# Supplementary material for: Lung Squamous Cell Carcinomas with Basaloid Histology Represent a Specific Molecular Entity
Source: Oxford University Press journal article supplement (doi:10.1158/1078-0432.ccr-14-0459), 2014-09-05
Supplement: 10780432ccr140459-sup-127410_1_supp_2530355_n7m6pr.xlsx [file 10780432ccr140459-sup-127410_1_supp_2530355_n7m6pr.xlsx]

## Sheet: SUP1A
Characteristics of the antibodies used for immunostaining
Antibody	Clone	Source	Working dilution	Retrieving buffer/time in minutes
P40	Polyclonal	Calbiochem	1/1000	Tris EDTA pH 8,5/30
P63	4A4	Abcam	1/50	Tris EDTA pH 8,5/30
TTF1	8G7G3/1	NeoMarkers	1/75	Tris EDTA pH 8,5/30
Chromogranin A	LK2H10	Chemicon	1/1000	Tris EDTA pH 8,5/30
Synaptophysin	Polyclonal	Zymed	1/100	Tris EDTA pH 8,5/60
CD56 (NCAM)	1B6	Novocastra	1/40	Tris EDTA pH 8,5/60
CK34bE12	Polyclonal	Dako	1/50	Tris EDTA pH 8,5/60
SOX4	Polyclonal	Thermo Scientific	1/50	Citrate pH 6,0/90
Involucrin	SY5	Abcam	1/20000	Citrate pH 6,0/30

## Sheet: SUP1B
Clinical characteristics of the CIT series
Number of patient		93
Histology	pure basaloid	24
	mixed basaloid	18
	well diff SCC	36
	poorly diff SCC	15
Gender	% Male	89
	% Female	4
age at diagnosis	median	64
Smoking	% smoker	98
Stage	% I	59
	%II	20
	% III	18
	% IV	2
Chemotherapy	% performed	5
Radiotherapy	% performed	25

## Sheet: SUP2A
DIFFERENTIAL GENE EXPRESSION - BETWEEN HISTOLOGIC LUNG SCC SUBTYPES (CIT series)
gene	GM.SCC_wd	GM.SCC_pd	GM.pBAS	GM.mBAS	FC.mBASvsSCC	FC.pBASvsSCC	FC.mBASvsSCC_pd	FC.pBASvsSCC_pd	BASvsSCC.limmaP	BASvsSCC.limmaQ	BASvsSCC.AUC	pBASvsSCC.limmaP	pBASvsSCC.limmaQ	pBASvsSCC.AUC	mBASvsSCC.limmaP	mBASvsSCC.limmaQ	mBASvsSCC.AUC	BASvsSCC_wd.limmaP	BASvsSCC_wd.limmaQ	BASvsSCC_wd.AUC	pBASvsSCC_wd.limmaP	pBASvsSCC_wd.limmaQ	pBASvsSCC_wd.AUC	mBASvsSCC_wd.limmaP	mBASvsSCC_wd.limmaQ	mBASvsSCC_wd.AUC	BASvsSCC_pd.limmaP	BASvsSCC_pd.limmaQ	BASvsSCC_pd.AUC	pBASvsSCC_pd.limmaP	pBASvsSCC_pd.limmaQ	pBASvsSCC_pd.AUC	mBASvsSCC_pd.limmaP	mBASvsSCC_pd.limmaQ	mBASvsSCC_pd.AUC	op	cutoff	TP	TN	FN	FP	sensitivity	specificity	PPV	NPV	accuracy	FisherP	keep
SOX4	7.39039	7.76588	8.37422	7.61483	0.114003	0.87339	-0.151048	0.608339	1.10406e-05	0.00169026	0.756303	2.26056e-10	5.67568e-07	0.898693	0.406616	0.828673	0.566449	4.11331e-06	0.00182732	0.795635	2.01089e-10	5.02497e-07	0.925926	0.133138	0.75797	0.621914	0.125127	0.455298	0.661905	0.000298804	0.0315756	0.833333	0.390656	0.770738	0.566667	>	8.16647	21	51	21	0	0.5	1	1	0.708333	0.774194	1.45573e-09	1
CBX5	6.33549	6.22166	7.13916	6.69122	0.389201	0.837146	0.469554	0.917499	4.76086e-07	0.000453211	0.782913	1.73731e-08	7.38946e-06	0.857843	0.00507221	0.410689	0.683007	2.63231e-05	0.00369456	0.765212	1.41426e-06	0.000173451	0.83912	0.0210692	0.620524	0.666667	0.00032729	0.0740502	0.825397	3.3406e-05	0.0143733	0.902778	0.014079	0.401502	0.722222	>	7.06149	19	50	23	1	0.452381	0.980392	0.95	0.684932	0.741935	2.19048e-07	1
PATZ1	5.50497	5.68694	6.05738	5.82641	0.267917	0.498882	0.139469	0.370434	1.9169e-06	0.000764941	0.754902	7.47146e-08	2.13374e-05	0.835784	0.00936111	0.427184	0.647059	2.72676e-06	0.00149789	0.781085	1.48232e-07	4.29466e-05	0.856481	0.00576732	0.581574	0.680556	0.0277493	0.261915	0.692063	0.00180807	0.0579731	0.786111	0.314995	0.728451	0.566667	>	6.05458	19	50	23	1	0.452381	0.980392	0.95	0.684932	0.741935	2.19048e-07	1
KCNK6	6.38435	6.04013	5.10933	5.70736	-0.575749	-1.17378	-0.332769	-0.9308	9.83382e-08	0.000245735	0.825397	5.61416e-09	3.77062e-06	0.892974	0.00888691	0.427184	0.735294	1.41361e-07	0.000282595	0.85119	1.01368e-08	9.21108e-06	0.913194	0.00510615	0.581574	0.768519	0.00275358	0.122326	0.763492	3.46787e-05	0.0143733	0.844444	0.197064	0.6435	0.655556	<	6.1404	39	29	3	22	0.928571	0.568627	0.639344	0.90625	0.731183	2.46986e-07	1
C1orf224	5.31499	5.29732	4.92765	4.98527	-0.324521	-0.382147	-0.312052	-0.369678	5.93619e-07	0.000486318	0.79225	2.34801e-05	0.00087573	0.80719	0.000769307	0.378067	0.772331	2.17882e-06	0.00149789	0.78373	5.47798e-05	0.00205075	0.800926	0.00106111	0.581574	0.760802	0.000133442	0.0564478	0.812698	0.000818214	0.0442585	0.822222	0.003979	0.363531	0.8	<	5.22895	39	28	3	23	0.928571	0.54902	0.629032	0.903226	0.72043	6.29808e-07	1
RBMX	8.15642	8.17436	8.68933	8.34383	0.182136	0.527627	0.169474	0.514965	5.65165e-07	0.000486318	0.773576	1.47465e-09	1.69596e-06	0.864379	0.0283316	0.489099	0.652505	9.55175e-06	0.00257356	0.777116	6.69436e-08	2.57806e-05	0.863426	0.0442912	0.674353	0.662037	0.00161513	0.105676	0.765079	2.73683e-05	0.0143733	0.866667	0.124105	0.575946	0.62963	>	8.63361	18	50	24	1	0.428571	0.980392	0.947368	0.675676	0.731183	6.4302e-07	1
SFRS3	7.52719	7.57334	7.93034	7.70769	0.166923	0.389574	0.134343	0.356995	1.40255e-06	0.000644862	0.78338	9.41416e-09	4.59036e-06	0.877451	0.0212457	0.469558	0.657952	5.53131e-06	0.00201048	0.801587	3.42241e-08	1.90048e-05	0.899306	0.0196311	0.620524	0.671296	0.00670089	0.16257	0.739683	0.000312928	0.0320808	0.825	0.21637	0.658479	0.625926	>	7.87356	20	49	22	2	0.47619	0.960784	0.909091	0.690141	0.741935	6.93441e-07	1
TOM1	6.6327	6.622	6.30904	6.42141	-0.208145	-0.320509	-0.200595	-0.31296	3.37518e-06	0.000992762	0.781979	9.16152e-06	0.000470817	0.820261	0.00361822	0.396974	0.730937	3.39965e-05	0.00416947	0.772487	7.2143e-05	0.00242388	0.806713	0.00796891	0.581574	0.726852	0.000984218	0.0909924	0.804762	0.000864988	0.0447277	0.852778	0.0118811	0.397188	0.740741	<	6.67057	40	25	2	26	0.952381	0.490196	0.606061	0.925926	0.698925	1.76002e-06	1
KRT16	10.3329	8.50853	6.73832	8.80728	-0.98905	-3.05801	0.298747	-1.77021	2.25236e-06	0.000849564	0.773109	2.33354e-08	9.14703e-06	0.857026	0.0751887	0.575847	0.66122	5.4068e-08	0.000272656	0.833333	4.77261e-10	9.09538e-07	0.90162	0.00599744	0.581574	0.742284	0.154936	0.493361	0.628571	0.00596599	0.0907666	0.75	0.649736	0.890625	0.533333	<	10.8863	42	19	0	32	1	0.372549	0.567568	1	0.655914	2.3287e-06	1
IVL	7.06069	5.36677	3.8807	5.48263	-1.07985	-2.68177	0.115857	-1.48607	1.99209e-07	0.000284456	0.79972	3.60047e-09	2.76835e-06	0.898693	0.0324191	0.495355	0.667756	5.99535e-10	1.19853e-05	0.867725	3.17016e-12	3.16873e-08	0.953704	0.00143835	0.581574	0.753086	0.0991445	0.41735	0.636508	0.00174216	0.0574296	0.766667	0.848419	0.959515	0.537037	<	6.98914	39	25	3	26	0.928571	0.490196	0.6	0.892857	0.688172	9.15898e-06	1
RPRD1A	7.29301	7.15128	8.05168	7.54357	0.292239	0.800349	0.392285	0.900394	6.98646e-08	0.000245735	0.800187	2.66515e-10	5.67568e-07	0.909314	0.0120232	0.442459	0.654684	5.31608e-06	0.00201048	0.781746	2.48994e-08	1.57346e-05	0.902778	0.0392431	0.667686	0.62037	6.33556e-05	0.0413124	0.844444	1.89633e-06	0.00995408	0.925	0.0151928	0.407665	0.737037	>	7.57461	31	45	11	6	0.738095	0.882353	0.837838	0.803571	0.817204	7.35774e-10	0
C1orf77	8.44043	8.46585	8.78854	8.63749	0.189584	0.340629	0.171644	0.322689	9.48952e-07	0.000611952	0.79972	2.45434e-07	4.10119e-05	0.857026	0.00541116	0.410689	0.723312	2.97949e-06	0.00156745	0.816799	4.71893e-07	8.99967e-05	0.877315	0.00456013	0.581574	0.736111	0.00328363	0.128327	0.75873	0.00097686	0.0470424	0.808333	0.0852557	0.531342	0.692593	>	8.60758	31	44	11	7	0.738095	0.862745	0.815789	0.8	0.806452	3.49211e-09	0
MPZL3	5.10809	4.98435	4.60132	4.72115	-0.35054	-0.470374	-0.263194	-0.383028	7.81767e-08	0.000245735	0.821195	4.21407e-07	5.69212e-05	0.860294	0.000650546	0.378067	0.769063	8.91772e-08	0.000272656	0.834656	3.53805e-07	7.60528e-05	0.873843	0.000396452	0.581574	0.782407	0.00161824	0.105676	0.788889	0.000898685	0.0453196	0.827778	0.0401648	0.478793	0.737037	<	4.87714	34	40	8	11	0.809524	0.784314	0.755556	0.833333	0.795699	8.80291e-09	0
ATP13A4	4.57456	4.33137	3.7904	3.87323	-0.629802	-0.712637	-0.458138	-0.540972	1.28058e-05	0.0018156	0.801587	0.00036614	0.00577703	0.840686	0.00248835	0.387853	0.749455	4.51023e-06	0.00191839	0.837302	0.000177757	0.0044868	0.873843	0.000856815	0.581574	0.78858	0.0084811	0.171319	0.715873	0.0273363	0.183014	0.761111	0.0396701	0.47659	0.655556	<	3.76748	29	45	13	6	0.690476	0.882353	0.828571	0.775862	0.795699	1.07359e-08	0
HNRNPU	6.94138	6.97225	7.37874	7.2152	0.264739	0.428282	0.242953	0.406495	8.61429e-08	0.000245735	0.791317	1.89403e-08	7.88823e-06	0.849673	0.00126814	0.378067	0.713508	8.23699e-07	0.000774409	0.797619	1.36749e-07	4.12443e-05	0.855324	0.00210911	0.581574	0.720679	0.000900186	0.0898268	0.77619	0.000141397	0.0253667	0.836111	0.0364849	0.468376	0.696296	>	7.34268	24	48	18	3	0.571429	0.941176	0.888889	0.727273	0.774194	4.06262e-08	0
SCAI	3.97187	3.98756	4.55949	4.26756	0.291075	0.583006	0.280006	0.571937	5.9592e-08	0.000245735	0.787115	5.931e-09	3.82473e-06	0.835784	0.00084659	0.378067	0.722222	1.85562e-06	0.00132484	0.785053	2.70896e-07	6.08183e-05	0.832176	0.00248815	0.581574	0.722222	0.000716765	0.084786	0.792063	0.000133332	0.0253667	0.844444	0.0160481	0.409665	0.722222	>	4.40062	24	48	18	3	0.571429	0.941176	0.888889	0.727273	0.774194	4.06262e-08	0
PLEKHM1	5.80919	5.7288	5.46636	5.71604	-0.0695024	-0.319182	-0.0127547	-0.262434	0.0100068	0.0777025	0.690476	0.000912055	0.0107951	0.787582	0.477426	0.86108	0.561002	0.0112907	0.107134	0.702381	0.00135767	0.0175105	0.798611	0.381654	0.882327	0.574074	0.214104	0.562216	0.661905	0.0516452	0.248995	0.761111	0.920793	0.978077	0.52963	<	5.37931	18	51	24	0	0.428571	1	1	0.68	0.741935	4.85664e-08	0
FUT3	5.74159	5.07868	4.49594	4.96582	-0.580796	-1.05068	-0.112863	-0.582743	1.67222e-05	0.00212525	0.771242	8.80494e-06	0.000457194	0.848039	0.0316562	0.4945	0.668845	7.27165e-07	0.000765092	0.811508	3.8026e-07	8.00186e-05	0.875	0.00531303	0.581574	0.726852	0.123095	0.451484	0.674603	0.0231104	0.169015	0.783333	0.722578	0.920612	0.52963	<	4.39966	20	50	22	1	0.47619	0.980392	0.952381	0.694444	0.752688	7.23235e-08	0
YPEL1	4.56594	4.71078	5.45332	4.76858	0.160046	0.844787	0.057804	0.742545	4.19758e-06	0.00111597	0.743231	1.95831e-09	2.00472e-06	0.86683	0.0742692	0.574136	0.578431	2.13473e-05	0.00336027	0.777116	5.21704e-08	2.32029e-05	0.887731	0.0397347	0.668537	0.62963	0.0274028	0.26111	0.661905	0.00122067	0.0504184	0.816667	0.665093	0.89843	0.544444	>	5.01691	20	50	22	1	0.47619	0.980392	0.952381	0.694444	0.752688	7.23235e-08	0
LDLRAD3	5.28842	5.28663	5.79186	5.45732	0.169421	0.503961	0.170684	0.505223	5.08588e-06	0.00114199	0.731559	3.87394e-08	1.38293e-05	0.820261	0.038656	0.509742	0.61329	8.22512e-05	0.00682275	0.726852	1.67836e-06	0.00019507	0.8125	0.0697647	0.703845	0.612654	0.00378574	0.135628	0.742857	0.000202956	0.0277897	0.838889	0.120394	0.5726	0.614815	>	5.64436	20	50	22	1	0.47619	0.980392	0.952381	0.694444	0.752688	7.23235e-08	0
OBFC2A	6.26189	6.1778	5.61304	5.94337	-0.293788	-0.624121	-0.234434	-0.564767	1.95086e-05	0.00220912	0.753968	2.5544e-07	4.11815e-05	0.85049	0.0453916	0.525292	0.625272	0.000115228	0.00811102	0.749339	3.28304e-06	0.000305262	0.837963	0.0616476	0.698803	0.631173	0.00864384	0.1725	0.765079	4.81086e-05	0.0153255	0.880556	0.224864	0.665869	0.611111	<	5.78701	25	47	17	4	0.595238	0.921569	0.862069	0.734375	0.774194	7.3377e-08	0
EEF1A1	11.2581	11.2815	11.4068	11.4341	0.169187	0.141834	0.152637	0.125284	5.92696e-06	0.00119683	0.780579	0.000418807	0.00631877	0.77451	6.66189e-05	0.378067	0.788671	4.44328e-05	0.00475003	0.777116	0.00138244	0.017659	0.771991	0.000302644	0.581574	0.783951	0.00466649	0.144366	0.788889	0.0213702	0.162976	0.780556	0.00322319	0.354125	0.8	>	11.4144	25	47	17	4	0.595238	0.921569	0.862069	0.734375	0.774194	7.3377e-08	0
CPSF3	8.71916	8.78079	9.1536	9.09502	0.35774	0.416316	0.314238	0.372813	4.1428e-05	0.00326058	0.755369	0.000238029	0.00427778	0.77451	0.00581967	0.410689	0.729847	2.15418e-05	0.00336439	0.771825	6.99487e-05	0.00239853	0.789352	0.00261714	0.581574	0.748457	0.0146555	0.208317	0.715873	0.0203872	0.159204	0.738889	0.0911326	0.538447	0.685185	>	8.80201	36	35	6	16	0.857143	0.686275	0.692308	0.853659	0.763441	1.05602e-07	0
TMBIM1	10.0933	10.0591	9.33321	9.76887	-0.314387	-0.75004	-0.290276	-0.725928	9.26467e-07	0.000611952	0.782446	1.4165e-07	3.27381e-05	0.839869	0.01128	0.442459	0.705882	1.29134e-05	0.00268835	0.778439	2.88368e-06	0.000283035	0.834491	0.0191887	0.620524	0.703704	0.00101005	0.0913663	0.792063	0.000177787	0.0265978	0.852778	0.0235516	0.430943	0.711111	<	9.98245	36	35	6	16	0.857143	0.686275	0.692308	0.853659	0.763441	1.05602e-07	0
HIST1H4C	9.48366	9.50361	10.3036	10.0235	0.534014	0.81405	0.519937	0.799973	3.27243e-07	0.000373224	0.792717	1.12414e-06	0.000115245	0.834967	0.00213602	0.387853	0.736383	1.51467e-06	0.00120595	0.800926	3.35828e-06	0.000307385	0.83912	0.00261183	0.581574	0.75	0.000295572	0.0695149	0.773016	0.000274675	0.0300056	0.825	0.0155805	0.40929	0.703704	>	9.87776	33	39	9	12	0.785714	0.764706	0.733333	0.8125	0.774194	1.16168e-07	0
TSPAN9	7.4399	7.53132	7.27981	7.12361	-0.343179	-0.186976	-0.407712	-0.251509	0.00165565	0.0272608	0.753968	0.0668946	0.194402	0.670752	6.70092e-06	0.133958	0.864924	0.0125701	0.113757	0.743386	0.164228	0.378016	0.659722	5.01698e-05	0.503497	0.854938	0.016107	0.217565	0.779365	0.131776	0.391668	0.697222	1.74078e-05	0.174	0.888889	<	7.19369	26	46	16	5	0.619048	0.901961	0.83871	0.741935	0.774194	1.24423e-07	0
SLPI	11.3626	10.5952	9.4796	10.4056	-0.731336	-1.65731	-0.189586	-1.11556	1.09735e-05	0.00169026	0.769841	2.67808e-06	0.000207296	0.820261	0.0182357	0.459711	0.702614	2.53067e-06	0.00149789	0.814815	9.1929e-07	0.000134143	0.856481	0.00196216	0.581574	0.759259	0.0957991	0.412895	0.661905	0.0282594	0.185042	0.733333	0.625495	0.880086	0.566667	<	10.5824	32	40	10	11	0.761905	0.784314	0.744186	0.8	0.774194	1.3241e-07	0
FAM83A	6.58388	6.25786	5.43144	5.94653	-0.541462	-1.05655	-0.311333	-0.826423	2.58633e-05	0.00255957	0.75957	1.16327e-05	0.000546543	0.843137	0.0456467	0.525292	0.648148	1.63268e-05	0.0028137	0.778439	7.53242e-06	0.000528353	0.855324	0.0267963	0.636133	0.675926	0.0142135	0.208198	0.714286	0.00173726	0.0574296	0.813889	0.311241	0.727125	0.581481	<	5.17401	17	51	25	0	0.404762	1	1	0.671053	0.731183	1.47642e-07	0
ZBTB10	4.51924	4.63855	5.18915	4.89721	0.342874	0.634815	0.258655	0.550595	5.05326e-08	0.000245735	0.81606	4.84209e-08	1.58686e-05	0.841503	0.000618275	0.378067	0.782135	2.3951e-07	0.000368311	0.835979	2.78351e-07	6.11485e-05	0.856481	0.000429163	0.581574	0.808642	0.00191045	0.111023	0.768254	0.000845207	0.0445819	0.805556	0.0261558	0.438314	0.718519	>	4.85378	29	43	13	8	0.690476	0.843137	0.783784	0.767857	0.774194	1.76886e-07	0
ZNF740	5.1107	5.13182	5.38016	5.28066	0.163746	0.263249	0.148843	0.248346	4.97161e-06	0.00114199	0.760037	2.86234e-06	0.00021626	0.803105	0.00433377	0.403314	0.702614	5.12591e-05	0.00514935	0.757275	3.2589e-05	0.00142167	0.798611	0.00996598	0.581574	0.70216	0.00410467	0.139212	0.766667	0.00133044	0.0520484	0.813889	0.0440055	0.485421	0.703704	>	5.24735	29	43	13	8	0.690476	0.843137	0.783784	0.767857	0.774194	1.76886e-07	0
LMF2	8.43078	8.41677	7.99154	8.28451	-0.142145	-0.435117	-0.132253	-0.425224	8.02047e-07	0.000593842	0.778711	5.88747e-10	7.84643e-07	0.89134	0.0475436	0.533059	0.62854	1.24518e-05	0.00268835	0.777116	2.78913e-08	1.68962e-05	0.890046	0.0699252	0.703845	0.626543	0.00180163	0.10914	0.78254	1.02763e-05	0.0126627	0.894444	0.178001	0.627604	0.633333	<	8.1865	27	45	15	6	0.642857	0.882353	0.818182	0.75	0.774194	2.05536e-07	0
SPRYD3	7.69097	7.57698	7.30248	7.52233	-0.135114	-0.354959	-0.0546541	-0.274499	8.37175e-06	0.0014553	0.744631	2.49866e-07	4.10119e-05	0.816993	0.045624	0.525292	0.648148	1.36843e-05	0.00273054	0.766534	8.55406e-07	0.000127615	0.833333	0.0271728	0.636395	0.677469	0.0319013	0.272145	0.692063	0.0020492	0.0598911	0.777778	0.498781	0.826109	0.577778	<	7.32467	19	50	23	1	0.452381	0.980392	0.95	0.684932	0.741935	2.19048e-07	0
KPNA5	5.44189	5.60417	6.44247	5.64037	0.15075	0.952852	0.0361955	0.838298	3.81423e-06	0.00104453	0.744164	2.44395e-10	5.67568e-07	0.883987	0.256148	0.746469	0.557734	1.17592e-05	0.00268835	0.759259	2.49876e-09	3.56805e-06	0.896991	0.1629	0.781591	0.575617	0.0169792	0.222286	0.707937	9.55591e-05	0.0227419	0.852778	0.839363	0.958009	0.514815	>	6.2627	19	50	23	1	0.452381	0.980392	0.95	0.684932	0.741935	2.19048e-07	0
METRNL	8.02456	8.06268	6.91865	7.54911	-0.486663	-1.11712	-0.513571	-1.14402	1.71305e-07	0.000263427	0.787582	8.78902e-09	4.59036e-06	0.863562	0.00658493	0.421538	0.686275	5.71547e-06	0.0020195	0.780423	4.36328e-07	8.63627e-05	0.850694	0.0169923	0.615309	0.686728	0.000251511	0.0661573	0.804762	1.91861e-05	0.0130718	0.894444	0.0165115	0.409665	0.685185	<	7.14205	19	50	23	1	0.452381	0.980392	0.95	0.684932	0.741935	2.19048e-07	0
TNR	3.78396	3.84016	3.65677	3.65091	-0.149579	-0.143719	-0.189251	-0.183391	4.72747e-05	0.00343661	0.768441	0.00120236	0.0130138	0.747549	0.000589138	0.378067	0.796296	0.000907828	0.0257059	0.751323	0.00797624	0.0561455	0.731481	0.00318923	0.581574	0.777778	0.000741033	0.0852437	0.809524	0.0059443	0.0907666	0.786111	0.00120894	0.316797	0.840741	<	3.59519	19	50	23	1	0.452381	0.980392	0.95	0.684932	0.741935	2.19048e-07	0
SNRPE	7.83432	7.78168	8.21146	8.0743	0.255459	0.392626	0.292616	0.429783	2.98741e-07	0.000373224	0.804855	8.58066e-08	2.31805e-05	0.859477	0.00140834	0.378067	0.732026	6.0625e-06	0.00208958	0.804233	7.84593e-07	0.000123502	0.866898	0.00384318	0.581574	0.720679	0.000394594	0.0784806	0.806349	0.000123077	0.0251064	0.841667	0.0174405	0.410289	0.759259	>	8.08322	24	47	18	4	0.571429	0.921569	0.857143	0.723077	0.763441	2.25532e-07	0
ZNF397	4.36631	4.27451	5.01794	4.48177	0.142459	0.678628	0.207265	0.743434	8.32002e-07	0.000594019	0.798319	2.95266e-10	5.67568e-07	0.916667	0.111475	0.614251	0.640523	4.64389e-05	0.0048861	0.781746	6.70597e-08	2.57806e-05	0.905093	0.241586	0.816207	0.617284	0.000293709	0.0695149	0.838095	1.99171e-06	0.00995408	0.944444	0.0527001	0.492587	0.696296	>	4.66161	24	47	18	4	0.571429	0.921569	0.857143	0.723077	0.763441	2.25532e-07	0
MALL	9.48409	9.06389	7.39345	8.85157	-0.508936	-1.96705	-0.212326	-1.67044	5.38536e-08	0.000245735	0.804855	1.19234e-11	1.39558e-07	0.922386	0.0630297	0.557728	0.648148	1.22751e-07	0.000272656	0.830026	5.83386e-11	1.94375e-07	0.93287	0.0301293	0.64222	0.692901	0.00276394	0.122488	0.744444	3.32625e-06	0.010966	0.897222	0.504902	0.829562	0.540741	<	7.88128	21	49	21	2	0.5	0.960784	0.913043	0.7	0.752688	2.43534e-07	0
PSME4	6.85231	6.84579	7.29131	7.06529	0.214897	0.440916	0.219497	0.445516	1.98969e-05	0.00222212	0.76704	7.54077e-06	0.000406592	0.806373	0.016548	0.450544	0.714597	9.68753e-05	0.00733573	0.782407	3.14819e-05	0.00139238	0.818287	0.0182505	0.618488	0.734568	0.00614988	0.158059	0.730159	0.00311563	0.069727	0.777778	0.0780498	0.522087	0.666667	>	6.92972	36	34	6	17	0.857143	0.666667	0.679245	0.85	0.752688	2.95417e-07	0
TADA1	5.29546	5.23276	5.58305	5.46723	0.190213	0.306029	0.234477	0.350293	1.05126e-06	0.000618111	0.782913	1.66666e-06	0.000148081	0.827614	0.00558531	0.410689	0.723312	3.05957e-05	0.00389579	0.757937	2.67605e-05	0.00123835	0.805556	0.0189897	0.620524	0.694444	3.00164e-05	0.037114	0.842857	1.83205e-05	0.0130718	0.880556	0.00526233	0.370307	0.792593	>	5.39946	34	37	8	14	0.809524	0.72549	0.708333	0.822222	0.763441	3.12037e-07	0
FAM161A	4.43533	4.48775	5.23385	4.62527	0.174517	0.783098	0.137517	0.746097	5.88861e-05	0.00395263	0.744164	3.08598e-07	4.55148e-05	0.839869	0.22175	0.722802	0.616558	0.000245806	0.0122237	0.751984	2.54725e-06	0.000259806	0.844907	0.217516	0.812698	0.628086	0.0146937	0.208317	0.725397	0.000568999	0.0382992	0.827778	0.452831	0.8031	0.588889	>	4.50704	34	37	8	14	0.809524	0.72549	0.708333	0.822222	0.763441	3.12037e-07	0
SMEK2	6.06868	6.13725	6.36044	6.20284	0.113996	0.271599	0.0655925	0.223195	0.000630849	0.0152679	0.720822	0.000301703	0.00503872	0.755719	0.115028	0.620279	0.674292	0.00058898	0.0200243	0.744709	0.000335492	0.00676772	0.773148	0.0725391	0.70463	0.70679	0.0655642	0.353764	0.663492	0.0290351	0.187663	0.713889	0.437261	0.794244	0.596296	>	6.07135	38	31	4	20	0.904762	0.607843	0.655172	0.885714	0.741935	3.33138e-07	0
PVRL1	5.286	5.20386	4.86955	5.12922	-0.132621	-0.392287	-0.0746441	-0.33431	6.74165e-06	0.00128355	0.755369	2.72412e-07	4.18908e-05	0.845588	0.0634462	0.557728	0.635076	8.34752e-06	0.00254565	0.775794	4.28172e-07	8.58197e-05	0.855324	0.0321329	0.650748	0.669753	0.0156265	0.21524	0.706349	0.00165001	0.0560253	0.822222	0.408518	0.780375	0.551852	<	5.01288	25	46	17	5	0.595238	0.901961	0.833333	0.730159	0.763441	3.71906e-07	0
NAGLU	5.22919	5.19598	4.98239	5.13522	-0.0842044	-0.237034	-0.0607603	-0.21359	8.22143e-05	0.00474129	0.727358	1.56832e-06	0.000142841	0.816993	0.106555	0.611101	0.607843	0.000300198	0.0135431	0.734127	1.09487e-05	0.000679739	0.821759	0.111625	0.737956	0.617284	0.0251249	0.252197	0.711111	0.00160544	0.0556949	0.805556	0.391488	0.771852	0.585185	<	5.06581	25	46	17	5	0.595238	0.901961	0.833333	0.730159	0.763441	3.71906e-07	0
BCL2	4.99027	4.99451	5.71336	5.14397	0.152454	0.721847	0.149457	0.71885	1.16763e-05	0.00174194	0.736695	2.03652e-08	8.30857e-06	0.83415	0.0997932	0.60293	0.606754	0.000136289	0.00905167	0.733466	8.36023e-07	0.000126232	0.832176	0.128657	0.752475	0.601852	0.0095288	0.180048	0.744444	0.000553422	0.0379947	0.838889	0.26128	0.695228	0.618519	>	5.29659	25	46	17	5	0.595238	0.901961	0.833333	0.730159	0.763441	3.71906e-07	0
GM2A	7.59807	7.5018	7.00735	7.32302	-0.246729	-0.562403	-0.178773	-0.494447	0.000189814	0.00763495	0.69888	1.38093e-05	0.000618608	0.767974	0.0557722	0.546421	0.606754	0.000490991	0.0178462	0.709656	4.85061e-05	0.00189757	0.775463	0.0536609	0.691419	0.621914	0.0497823	0.31995	0.673016	0.0107448	0.120455	0.75	0.337775	0.741378	0.57037	<	6.8299	16	51	26	0	0.380952	1	1	0.662338	0.72043	4.37247e-07	0
IQCK	4.86336	4.93165	5.3003	4.966	0.0825561	0.416852	0.0343513	0.368647	0.000160906	0.00691758	0.688609	6.70254e-07	7.8357e-05	0.794118	0.256773	0.746469	0.54793	0.000465339	0.017227	0.712302	5.46472e-06	0.000428413	0.809028	0.207156	0.80742	0.583333	0.0538848	0.328715	0.631746	0.00366486	0.0742979	0.758333	0.732258	0.922463	0.537037	>	5.33907	16	51	26	0	0.380952	1	1	0.662338	0.72043	4.37247e-07	0
HDAC2	7.13416	7.09851	7.67956	7.36426	0.240586	0.555887	0.26575	0.581051	8.67478e-07	0.000597992	0.798319	4.28011e-08	1.45023e-05	0.860294	0.0145862	0.447072	0.715686	1.50252e-05	0.00273054	0.789021	7.94653e-07	0.000124109	0.856481	0.0283412	0.641087	0.699074	0.000586788	0.0803457	0.820635	5.83674e-05	0.0169333	0.869444	0.0421203	0.484297	0.755556	>	7.18406	37	32	5	19	0.880952	0.627451	0.660714	0.864865	0.741935	5.25622e-07	0
SCEL	4.9644	4.29148	3.21096	4.23194	-0.534537	-1.55552	-0.0595339	-1.08052	6.21529e-06	0.0012302	0.781979	4.22381e-08	1.45023e-05	0.893791	0.110981	0.6136	0.632898	3.9952e-07	0.000499176	0.839286	5.00471e-10	9.09538e-07	0.952546	0.0294414	0.64222	0.688272	0.0562756	0.334712	0.644444	0.000775767	0.043933	0.752778	0.893516	0.972839	0.5	<	3.61399	28	43	14	8	0.666667	0.843137	0.777778	0.754386	0.763441	5.54939e-07	0
MPZL2	8.56629	8.07501	7.33269	7.95299	-0.468804	-1.08911	-0.122011	-0.742319	1.30621e-06	0.000644862	0.771242	1.17853e-07	2.8593e-05	0.859477	0.0227743	0.472283	0.653595	2.20044e-07	0.000366576	0.808862	2.51867e-08	1.57346e-05	0.884259	0.00392956	0.581574	0.708333	0.0412525	0.298061	0.680952	0.00381124	0.0754455	0.8	0.616916	0.876376	0.522222	<	7.78765	28	43	14	8	0.666667	0.843137	0.777778	0.754386	0.763441	5.54939e-07	0
PRSS3	6.05159	5.71965	4.96821	5.3491	-0.604861	-0.98575	-0.37055	-0.751439	6.71947e-05	0.00431926	0.774977	0.000126866	0.00281484	0.852941	0.0411452	0.516018	0.671024	5.09542e-05	0.00514457	0.792989	0.000110814	0.00330042	0.87037	0.0295274	0.64222	0.689815	0.00617303	0.158059	0.731746	0.00117919	0.0496837	0.811111	0.1963	0.64235	0.625926	<	4.98031	26	45	16	6	0.619048	0.882353	0.8125	0.737705	0.763441	5.93219e-07	0
PRAMEF12	4.02919	4.15929	3.88008	3.92639	-0.141065	-0.187373	-0.232899	-0.279207	6.51175e-05	0.00425413	0.737162	0.00026202	0.00458673	0.757353	0.00979494	0.427184	0.71024	0.00309924	0.0521963	0.69709	0.00448264	0.0381983	0.719907	0.0603612	0.695432	0.666667	2.72677e-05	0.037114	0.833333	0.000114926	0.0249726	0.847222	0.00125831	0.316797	0.814815	<	3.89471	26	45	16	6	0.619048	0.882353	0.8125	0.737705	0.763441	5.93219e-07	0
KLHL23	5.35073	5.37612	5.95318	5.68291	0.324708	0.594986	0.306783	0.577061	1.5128e-07	0.000255891	0.802054	7.99486e-08	2.21979e-05	0.852124	0.00303004	0.387853	0.735294	1.17633e-06	0.00102243	0.809524	5.0944e-07	9.242e-05	0.857639	0.00399106	0.581574	0.74537	0.000458597	0.0797171	0.784127	0.000137428	0.0253667	0.838889	0.0262919	0.439017	0.711111	>	5.40269	39	28	3	23	0.928571	0.54902	0.629032	0.903226	0.72043	6.29808e-07	0
PGLYRP4	5.66059	5.13095	4.87052	5.03494	-0.46987	-0.634293	-0.0960122	-0.260434	4.5876e-05	0.0033967	0.762372	0.000222027	0.00407206	0.792484	0.00916704	0.427184	0.722222	3.53404e-06	0.00160566	0.810185	3.41227e-05	0.00146698	0.834491	0.0014025	0.581574	0.777778	0.241852	0.589649	0.647619	0.157153	0.424731	0.691667	0.56092	0.855242	0.588889	<	4.94472	29	42	13	9	0.690476	0.823529	0.763158	0.763636	0.763441	6.35326e-07	0
LOC440983	7.65397	7.60049	8.0667	7.78961	0.151369	0.428461	0.189121	0.466213	2.65933e-05	0.00257731	0.728758	1.26753e-06	0.000122551	0.806373	0.0624157	0.557728	0.625272	0.000458701	0.0171873	0.714947	3.44534e-05	0.00147802	0.796296	0.132529	0.75797	0.606481	0.00186419	0.110774	0.761905	0.000222316	0.0284391	0.830556	0.0571843	0.497463	0.67037	>	8.07899	18	50	24	1	0.428571	0.980392	0.947368	0.675676	0.731183	6.4302e-07	0
HTATSF1	7.39645	7.31698	7.90032	7.52419	0.151112	0.527246	0.207205	0.583339	7.42415e-05	0.00454642	0.725957	1.74113e-06	0.000152662	0.806373	0.128264	0.636893	0.618736	0.00120337	0.0301462	0.712302	5.62073e-05	0.00207697	0.790509	0.251565	0.82082	0.608025	0.002773	0.122488	0.75873	0.000228001	0.0286299	0.844444	0.0831004	0.526471	0.644444	>	7.7209	23	47	19	4	0.547619	0.921569	0.851852	0.712121	0.752688	6.66079e-07	0
RPL31	9.3584	9.38282	9.91276	9.67773	0.31214	0.547177	0.294904	0.529941	2.03102e-06	0.000780811	0.76564	1.33706e-06	0.000128442	0.809641	0.00525212	0.410689	0.706972	1.94977e-05	0.00316893	0.76455	1.23084e-05	0.000743376	0.809028	0.0096649	0.581574	0.705247	0.00144443	0.102034	0.768254	0.000494749	0.0375671	0.811111	0.0286705	0.446032	0.711111	>	9.87748	23	47	19	4	0.547619	0.921569	0.851852	0.712121	0.752688	6.66079e-07	0
ANP32A	8.15586	8.34783	8.87793	8.49018	0.277852	0.665611	0.142345	0.530105	4.57109e-06	0.00113165	0.753501	2.25883e-07	4.03181e-05	0.832516	0.0329595	0.496529	0.648148	3.2221e-06	0.00158999	0.777778	1.50573e-07	4.30015e-05	0.859954	0.0130622	0.584174	0.66821	0.0241941	0.248845	0.695238	0.00256167	0.0641044	0.766667	0.41347	0.782961	0.6	>	8.70999	23	47	19	4	0.547619	0.921569	0.851852	0.712121	0.752688	6.66079e-07	0
PAPOLG	5.56004	5.64858	5.88736	5.8232	0.237122	0.301282	0.17462	0.238781	1.64048e-05	0.00210375	0.77451	1.60984e-05	0.000689128	0.810458	0.00345429	0.396867	0.72658	2.01296e-05	0.00324524	0.794312	1.17406e-05	0.000715568	0.827546	0.00247289	0.581574	0.75	0.0328664	0.27326	0.726984	0.0175897	0.150217	0.769444	0.146665	0.599537	0.67037	>	5.55248	40	26	2	25	0.952381	0.509804	0.615385	0.928571	0.709677	6.89627e-07	0
ZNF180	5.88984	5.96308	6.65807	5.97599	0.0646099	0.746695	0.0129078	0.694993	0.000242327	0.00890507	0.726424	1.12928e-07	2.85701e-05	0.875817	0.667927	0.919047	0.527233	0.000912441	0.0257636	0.725529	1.89034e-06	0.000209944	0.864583	0.617903	0.943227	0.540123	0.0173518	0.223794	0.728571	7.45882e-06	0.0116132	0.902778	0.937946	0.982888	0.503704	>	6.57458	20	49	22	2	0.47619	0.960784	0.909091	0.690141	0.741935	6.93441e-07	0
TMEM43	6.26434	6.27943	5.99296	6.17666	-0.0921129	-0.275812	-0.102766	-0.286465	8.35134e-05	0.00477284	0.749767	3.55741e-06	0.000245543	0.810458	0.0739991	0.573769	0.668845	0.000642102	0.0210431	0.753968	4.02438e-05	0.0016393	0.814815	0.110137	0.737742	0.67284	0.0118664	0.191772	0.739683	0.00249254	0.0636323	0.8	0.172791	0.624193	0.659259	<	6.08582	22	48	20	3	0.52381	0.941176	0.88	0.705882	0.752688	7.04288e-07	0
CPSF6	7.38533	7.41056	7.82139	7.71743	0.324676	0.428639	0.306866	0.410828	3.877e-06	0.00104737	0.777778	6.96364e-06	0.000388936	0.80719	0.00114798	0.378067	0.738562	3.99725e-05	0.00446228	0.773148	5.63926e-05	0.00207997	0.802083	0.00321446	0.581574	0.734568	0.0034768	0.131389	0.788889	0.00213196	0.0609809	0.819444	0.0216799	0.422286	0.748148	>	7.79052	22	48	20	3	0.52381	0.941176	0.88	0.705882	0.752688	7.04288e-07	0
STEAP4	6.12207	5.76075	4.74906	5.29892	-0.716875	-1.26673	-0.461828	-1.01169	0.000152706	0.006749	0.738095	0.000146138	0.0030817	0.789216	0.0521703	0.542905	0.669935	0.000183685	0.0104773	0.750661	0.000194704	0.00472369	0.796296	0.0423332	0.668977	0.689815	0.0175464	0.224106	0.707937	0.00427522	0.0797054	0.772222	0.228001	0.669048	0.622222	<	5.532	34	36	8	15	0.809524	0.705882	0.693878	0.818182	0.752688	9.3697e-07	0
PHF6	6.139	6.12905	6.62264	6.31669	0.180624	0.486572	0.187645	0.493593	1.5618e-06	0.000678738	0.78338	1.71476e-07	3.62124e-05	0.852124	0.0345848	0.499555	0.691721	3.5978e-05	0.00428824	0.765212	6.1754e-06	0.000467623	0.836806	0.0689973	0.703845	0.669753	0.00016032	0.060471	0.826984	1.26644e-05	0.0126627	0.888889	0.00884926	0.392659	0.744444	>	6.07615	42	20	0	31	1	0.392157	0.575342	1	0.666667	9.47992e-07	0
ZNF22	7.50765	7.74323	8.41575	7.80037	0.223428	0.838812	0.0571385	0.672523	7.71094e-05	0.00458778	0.750233	3.08274e-07	4.55148e-05	0.888072	0.24743	0.742844	0.566449	0.000117042	0.00812427	0.765873	1.0074e-06	0.000140979	0.894676	0.182389	0.788784	0.594136	0.0280208	0.262249	0.712698	1.39352e-05	0.0126627	0.872222	0.796039	0.944317	0.5	>	8.16863	24	46	18	5	0.571429	0.901961	0.827586	0.71875	0.752688	1.07091e-06	0
NCRNA00094	6.77691	6.6903	7.20296	6.82528	0.0738434	0.451516	0.134981	0.512653	0.000416525	0.0121299	0.694211	4.93677e-07	6.09204e-05	0.830065	0.46323	0.853522	0.513072	0.00445551	0.0644036	0.677249	1.62153e-05	0.000893003	0.8125	0.666814	0.953284	0.503086	0.0049783	0.145528	0.734921	1.62849e-05	0.0130718	0.872222	0.321762	0.7321	0.551852	>	7.03906	24	46	18	5	0.571429	0.901961	0.827586	0.71875	0.752688	1.07091e-06	0
SPRR2B	10.9398	9.74193	6.44505	9.01943	-1.56804	-4.14242	-0.722501	-3.29688	1.35852e-07	0.000255891	0.788515	3.40694e-10	5.67568e-07	0.875	0.0202603	0.469558	0.673203	9.52147e-08	0.000272656	0.821429	1.79346e-10	5.02497e-07	0.90162	0.00622208	0.581574	0.714506	0.0106309	0.183529	0.709524	0.000182277	0.0265978	0.811111	0.435858	0.793	0.574074	<	7.42247	24	46	18	5	0.571429	0.901961	0.827586	0.71875	0.752688	1.07091e-06	0
RIC8B	5.55293	5.67163	6.05402	5.7223	0.134461	0.466179	0.0506704	0.382388	1.32769e-06	0.000644862	0.783847	9.6441e-09	4.59036e-06	0.875817	0.0476083	0.533485	0.66122	1.46849e-06	0.00120595	0.822751	1.79909e-08	1.33206e-05	0.908565	0.0132284	0.586359	0.708333	0.021114	0.23753	0.690476	0.00139368	0.0529022	0.797222	0.571949	0.858706	0.548148	>	5.71758	32	38	10	13	0.761905	0.745098	0.711111	0.791667	0.752688	1.21166e-06	0
ELP2	7.13553	7.09314	7.46873	7.28907	0.166001	0.345668	0.195926	0.375593	1.95148e-06	0.000764941	0.780112	4.75263e-07	5.93811e-05	0.828431	0.0062661	0.412855	0.715686	7.70967e-05	0.00664328	0.760582	2.14556e-05	0.00106696	0.8125	0.0251447	0.628517	0.691358	0.000484254	0.0797171	0.826984	0.000161998	0.0257024	0.866667	0.00748551	0.383101	0.774074	>	7.24119	32	38	10	13	0.761905	0.745098	0.711111	0.791667	0.752688	1.21166e-06	0
MEX3C	5.02096	5.00807	5.29441	5.12624	0.109072	0.277235	0.118175	0.286338	3.18399e-05	0.00286277	0.749767	8.08495e-06	0.000427583	0.789216	0.0389856	0.509742	0.697168	0.000181631	0.0104773	0.75463	4.62872e-05	0.00182871	0.793981	0.0457775	0.677709	0.70216	0.0055016	0.149956	0.738095	0.00261236	0.0644133	0.777778	0.0876069	0.534722	0.685185	>	5.09326	32	38	10	13	0.761905	0.745098	0.711111	0.791667	0.752688	1.21166e-06	0
ARHGAP27	5.95768	5.83348	5.58392	5.77799	-0.143165	-0.337229	-0.0554888	-0.249553	0.0183552	0.110225	0.676937	0.00907376	0.0516778	0.745098	0.257992	0.746469	0.586057	0.0155908	0.127214	0.695106	0.0084868	0.0583786	0.763889	0.180319	0.787342	0.603395	0.312509	0.65009	0.633333	0.183124	0.457577	0.7	0.737218	0.92469	0.544444	<	5.32455	15	51	27	0	0.357143	1	1	0.653846	0.709677	1.26316e-06	0
TGIF2	6.4131	6.49648	7.30082	6.69084	0.253213	0.863189	0.194357	0.804334	3.09636e-06	0.000967176	0.756769	2.27806e-09	2.16861e-06	0.862745	0.0725141	0.569823	0.615468	2.70992e-05	0.0037073	0.759259	7.46079e-08	2.76201e-05	0.863426	0.0831845	0.715965	0.62037	0.00655912	0.159979	0.750794	6.50001e-05	0.0175597	0.861111	0.308755	0.725731	0.603704	>	7.38322	15	51	27	0	0.357143	1	1	0.653846	0.709677	1.26316e-06	0
RPL9	13.1057	13.1957	13.3258	13.2617	0.129533	0.19361	0.0659928	0.130069	3.85301e-05	0.00318287	0.730626	5.15431e-05	0.00149985	0.776144	0.0125675	0.444158	0.669935	2.50635e-05	0.00359375	0.768849	3.84246e-05	0.00158653	0.808449	0.00656504	0.581574	0.716049	0.0663239	0.354935	0.638889	0.0310847	0.194481	0.698611	0.30079	0.722295	0.559259	>	13.4062	15	51	27	0	0.357143	1	1	0.653846	0.709677	1.26316e-06	0
PTK6	6.77911	6.62629	5.64265	6.20132	-0.532849	-1.09152	-0.42497	-0.983638	1.10648e-06	0.000631987	0.794585	2.17573e-07	3.92108e-05	0.879085	0.0124561	0.443867	0.681917	5.47354e-06	0.00201048	0.795635	1.33193e-06	0.000168604	0.875	0.0138894	0.587968	0.689815	0.00185794	0.110774	0.792063	0.000181727	0.0265978	0.888889	0.0817763	0.52542	0.662963	<	5.37624	15	51	27	0	0.357143	1	1	0.653846	0.709677	1.26316e-06	0
ALS2CL	5.77084	5.5084	5.10653	5.48713	-0.206525	-0.587125	-0.0212679	-0.401867	5.44268e-07	0.000486318	0.777778	1.08557e-08	5.04689e-06	0.888889	0.0448353	0.524461	0.62963	1.16734e-07	0.000272656	0.818783	4.26587e-09	5.01642e-06	0.914352	0.0096719	0.581574	0.691358	0.0276108	0.261613	0.679365	0.000455362	0.0370046	0.827778	0.844093	0.959092	0.518519	<	5.15193	15	51	27	0	0.357143	1	1	0.653846	0.709677	1.26316e-06	0
SLC37A2	6.12863	6.04276	5.35984	5.79821	-0.305164	-0.743534	-0.244549	-0.682919	1.53604e-07	0.000255891	0.788049	2.00563e-09	2.00472e-06	0.879085	0.0173989	0.453462	0.666667	8.00806e-07	0.000774409	0.797619	1.24605e-08	1.05392e-05	0.884259	0.0167495	0.612929	0.682099	0.00104699	0.0930237	0.765079	1.69287e-05	0.0130718	0.866667	0.133211	0.585156	0.62963	<	5.82523	31	39	11	12	0.738095	0.764706	0.72093	0.78	0.752688	1.34849e-06	0
CENPF	6.80044	6.57077	7.64022	7.3582	0.625315	0.907329	0.787434	1.06945	2.82959e-07	0.000373224	0.785714	2.01755e-06	0.000172363	0.804739	0.00069521	0.378067	0.760349	6.23847e-06	0.00211379	0.775794	1.77833e-05	0.000948013	0.797454	0.00171191	0.581574	0.746914	4.08518e-05	0.037114	0.809524	0.000153013	0.0253667	0.822222	0.0014685	0.317632	0.792593	>	6.85032	37	31	5	20	0.880952	0.607843	0.649123	0.861111	0.731183	1.41453e-06	0
PI3	10.5126	8.87566	6.26848	9.06467	-0.966459	-3.76265	0.189002	-2.60719	1.20133e-06	0.000644862	0.766106	3.13491e-10	5.67568e-07	0.884804	0.115397	0.620279	0.607843	1.17807e-07	0.000272656	0.808201	9.93187e-12	4.52162e-08	0.917824	0.0179193	0.618488	0.662037	0.0738204	0.37041	0.665079	0.000795787	0.044045	0.805556	0.824157	0.952629	0.522222	<	7.81343	27	43	15	8	0.642857	0.843137	0.771429	0.741379	0.752688	1.6524e-06	0
MYB	4.4775	4.46527	6.00338	4.84177	0.367867	1.52948	0.376505	1.53812	1.01074e-06	0.000612293	0.791317	1.52705e-09	1.69596e-06	0.885621	0.0596799	0.551147	0.665577	2.30068e-05	0.00342717	0.790344	1.26961e-07	4.10444e-05	0.883102	0.0936275	0.729833	0.666667	0.0016562	0.10661	0.793651	4.03579e-05	0.014669	0.891667	0.0989601	0.546446	0.662963	>	4.9217	27	43	15	8	0.642857	0.843137	0.771429	0.741379	0.752688	1.6524e-06	0
SHROOM3	5.90053	5.94742	7.16827	6.51873	0.60441	1.25395	0.571313	1.22085	1.16786e-06	0.000644862	0.781979	9.61976e-08	2.53038e-05	0.857026	0.00492307	0.410689	0.681917	1.69418e-05	0.00286058	0.777778	2.04634e-06	0.000222328	0.84838	0.0100232	0.581574	0.683642	0.00259591	0.119081	0.792063	0.000431376	0.0361419	0.877778	0.0473511	0.48799	0.677778	>	6.42778	27	43	15	8	0.642857	0.843137	0.771429	0.741379	0.752688	1.6524e-06	0
MKNK2	9.8954	9.92025	9.37868	9.57655	-0.32616	-0.52403	-0.343699	-0.54157	9.43664e-05	0.00519432	0.749767	0.000137956	0.00297506	0.76634	0.0101997	0.427764	0.727669	0.000639147	0.0210221	0.744048	0.000753468	0.0118884	0.763889	0.0200537	0.620524	0.717593	0.00737985	0.16803	0.763492	0.00702752	0.0975605	0.772222	0.0301411	0.451257	0.751852	<	9.42885	25	45	17	6	0.595238	0.882353	0.806452	0.725806	0.752688	1.65578e-06	0
RAD54L	6.39408	6.55162	6.99547	6.8068	0.366384	0.555052	0.255183	0.443851	3.5166e-05	0.00299151	0.757236	0.000143836	0.00305571	0.756536	0.00610059	0.410689	0.75817	3.01275e-05	0.00389579	0.771825	0.000139576	0.00382753	0.768519	0.00228894	0.581574	0.776235	0.0274209	0.261158	0.722222	0.0312711	0.19493	0.727778	0.0990452	0.546663	0.714815	>	6.88373	25	45	17	6	0.595238	0.882353	0.806452	0.725806	0.752688	1.65578e-06	0
PFDN5	10.9812	11.0881	11.3145	11.2577	0.245092	0.301866	0.169608	0.226382	3.52292e-06	0.00100609	0.784781	6.63191e-05	0.00179403	0.77451	0.00128523	0.378067	0.798475	9.65519e-06	0.00257356	0.793651	0.000159314	0.00419058	0.788194	0.00172178	0.581574	0.800926	0.00338686	0.129306	0.763492	0.00637999	0.0937471	0.741667	0.00497646	0.36884	0.792593	>	11.0047	40	25	2	26	0.952381	0.490196	0.606061	0.925926	0.698925	1.76002e-06	0
DEFB4A	6.2548	5.99059	4.67825	6.03304	-0.144049	-1.49884	0.0424474	-1.31235	0.00176359	0.0282491	0.74183	7.30918e-06	0.00039936	0.895425	0.724218	0.934093	0.537037	0.00237933	0.0446203	0.736772	1.43638e-05	0.000821101	0.888889	0.622058	0.943583	0.533951	0.045406	0.307769	0.753968	1.28968e-05	0.0126627	0.911111	0.927695	0.979991	0.544444	<	4.62032	17	50	25	1	0.404762	0.980392	0.944444	0.666667	0.72043	1.83193e-06	0
IL1F5	5.09853	3.96357	3.37348	4.50829	-0.25643	-1.39124	0.544725	-0.590085	0.00252067	0.034945	0.738095	4.7644e-05	0.00141945	0.852941	0.535258	0.880131	0.584967	0.000204131	0.0112227	0.777116	3.35057e-06	0.000307385	0.883102	0.186792	0.791152	0.635802	0.776734	0.916574	0.644444	0.0435226	0.228303	0.780556	0.244285	0.681779	0.537037	<	3.1868	17	50	25	1	0.404762	0.980392	0.944444	0.666667	0.72043	1.83193e-06	0
LYNX1	5.6312	5.21257	4.98698	5.20971	-0.298357	-0.521094	-0.00285942	-0.225596	0.000133284	0.00632895	0.736228	0.000143305	0.00304767	0.794118	0.0566494	0.548174	0.659041	9.91601e-06	0.0026083	0.784392	1.93655e-05	0.000992658	0.837963	0.0136341	0.587968	0.712963	0.258863	0.6071	0.620635	0.0502717	0.244938	0.688889	0.984164	0.994651	0.52963	<	4.8698	17	50	25	1	0.404762	0.980392	0.944444	0.666667	0.72043	1.83193e-06	0
VPS26B	7.01229	6.95829	6.83112	6.85217	-0.144236	-0.165287	-0.106116	-0.127166	0.0253995	0.133411	0.612045	0.0461428	0.152638	0.595588	0.0496497	0.535707	0.633987	0.0343557	0.194007	0.628307	0.0590955	0.200004	0.615741	0.0547341	0.692287	0.645062	0.296829	0.636255	0.573016	0.327967	0.600512	0.547222	0.28503	0.711632	0.607407	<	6.65616	17	50	25	1	0.404762	0.980392	0.944444	0.666667	0.72043	1.83193e-06	0
PHF10	7.43624	7.55488	8.002	7.73805	0.266908	0.530859	0.183162	0.447113	3.20894e-05	0.00286277	0.706816	1.57644e-05	0.000680661	0.732843	0.00766635	0.425064	0.672113	5.68719e-05	0.00557316	0.731481	3.26421e-05	0.00142167	0.75	0.00317934	0.581574	0.70679	0.0406196	0.296188	0.647619	0.0219293	0.164746	0.691667	0.192319	0.640238	0.588889	>	8.08443	17	50	25	1	0.404762	0.980392	0.944444	0.666667	0.72043	1.83193e-06	0
SPRR3	11.2472	10.0516	6.06854	9.43982	-1.45572	-4.827	-0.61175	-3.98303	1.22308e-07	0.000255891	0.794118	2.79241e-11	1.39558e-07	0.902778	0.0395439	0.51044	0.649237	9.37071e-08	0.000272656	0.816799	1.13091e-11	4.52162e-08	0.922454	0.0108768	0.581574	0.675926	0.0109581	0.18634	0.739683	0.000111048	0.0248436	0.855556	0.553877	0.851604	0.585185	<	6.39869	21	48	21	3	0.5	0.941176	0.875	0.695652	0.741935	1.87076e-06	0
WNT7B	6.85239	6.77326	6.22692	6.72955	-0.0995731	-0.602202	-0.0437123	-0.546341	2.46143e-05	0.00251054	0.752568	3.47859e-09	2.76835e-06	0.881536	0.362233	0.806113	0.58061	9.22979e-05	0.00717948	0.755291	4.43578e-08	2.16282e-05	0.881944	0.31533	0.853495	0.58642	0.0131731	0.200188	0.746032	1.05492e-05	0.0126627	0.880556	0.752358	0.930409	0.566667	<	6.38355	21	48	21	3	0.5	0.941176	0.875	0.695652	0.741935	1.87076e-06	0
ACAP3	5.98239	5.86052	5.45517	5.75702	-0.189525	-0.491374	-0.103501	-0.40535	2.62412e-05	0.00257731	0.7493	5.01833e-07	6.15469e-05	0.837418	0.0746836	0.574953	0.631808	6.90123e-05	0.00630517	0.761905	2.76434e-06	0.000274935	0.84375	0.0647768	0.703845	0.652778	0.0223015	0.242551	0.719048	0.000517288	0.0377412	0.822222	0.423903	0.788081	0.581481	<	5.56322	21	48	21	3	0.5	0.941176	0.875	0.695652	0.741935	1.87076e-06	0
BCL9L	6.85862	6.77118	6.38316	6.50881	-0.324091	-0.449743	-0.262374	-0.388026	5.04104e-05	0.00357145	0.744164	0.000198984	0.00377114	0.744281	0.00153533	0.378067	0.744009	0.000164727	0.0101443	0.758598	0.000569799	0.00968609	0.761574	0.00189265	0.581574	0.75463	0.0257993	0.254819	0.709524	0.0325112	0.19816	0.702778	0.0320454	0.456912	0.718519	<	6.44684	21	48	21	3	0.5	0.941176	0.875	0.695652	0.741935	1.87076e-06	0
USP1	8.64464	8.7493	9.35558	8.92773	0.25231	0.680155	0.178429	0.606273	6.59287e-06	0.00127959	0.761438	2.42347e-07	4.10119e-05	0.826797	0.0287826	0.489406	0.674292	2.36753e-05	0.0034801	0.779762	1.40121e-06	0.000173451	0.842593	0.0222456	0.620524	0.695988	0.0139688	0.206126	0.71746	0.00189136	0.0588942	0.788889	0.242565	0.680456	0.622222	>	9.16884	21	48	21	3	0.5	0.941176	0.875	0.695652	0.741935	1.87076e-06	0
TBC1D19	5.69998	5.71761	6.24632	5.93034	0.225177	0.541152	0.212734	0.528709	2.02582e-05	0.0022499	0.727358	1.56163e-07	3.41453e-05	0.833333	0.0560589	0.546421	0.586057	0.000163393	0.0101127	0.722222	2.42257e-06	0.000250931	0.826389	0.0842199	0.716763	0.583333	0.00656208	0.159979	0.739683	0.000114423	0.0249726	0.85	0.197758	0.643777	0.592593	>	6.16655	21	48	21	3	0.5	0.941176	0.875	0.695652	0.741935	1.87076e-06	0
KHDRBS1	8.5383	8.68412	9.07848	8.79813	0.216935	0.497286	0.114004	0.394355	4.31699e-05	0.00328324	0.708683	7.31159e-06	0.00039936	0.76634	0.0141712	0.447072	0.631808	7.46037e-05	0.00657025	0.744048	1.9802e-05	0.00100985	0.796296	0.00685136	0.581574	0.674383	0.0671443	0.35661	0.62381	0.0236649	0.170912	0.694444	0.3488	0.747039	0.52963	>	8.88906	21	48	21	3	0.5	0.941176	0.875	0.695652	0.741935	1.87076e-06	0
PPYR1	3.85949	3.9215	3.68439	3.76244	-0.115286	-0.193336	-0.159057	-0.237107	1.37134e-05	0.00191709	0.761905	6.55998e-06	0.000372558	0.818627	0.0101721	0.427764	0.686275	0.000389816	0.0156168	0.738757	0.00011653	0.00338599	0.799769	0.0384612	0.667565	0.657407	0.000536075	0.0797171	0.81746	0.000309826	0.0319264	0.863889	0.0169977	0.410289	0.755556	<	3.77496	28	42	14	9	0.666667	0.823529	0.756757	0.75	0.752688	1.8861e-06	0
TBPL1	8.69906	8.5288	9.11648	9.01292	0.363938	0.467501	0.484127	0.58769	4.24261e-06	0.00111597	0.777778	4.34847e-05	0.00133945	0.781863	0.00175938	0.378067	0.772331	0.000156268	0.00988594	0.757937	0.000596222	0.0100329	0.759259	0.00918843	0.581574	0.756173	2.63082e-05	0.037114	0.825397	0.000146761	0.0253667	0.836111	0.000537581	0.316797	0.811111	>	8.97239	28	42	14	9	0.666667	0.823529	0.756757	0.75	0.752688	1.8861e-06	0
BRD3	6.62068	6.59735	6.94611	6.75578	0.14196	0.332291	0.158423	0.348754	5.10404e-05	0.00357145	0.752568	3.46891e-06	0.000242595	0.809641	0.053811	0.545781	0.676471	0.000592722	0.0201173	0.741402	6.19091e-05	0.00223398	0.796296	0.105172	0.736167	0.66821	0.0038585	0.136549	0.779365	0.000365908	0.0348327	0.841667	0.0948955	0.54163	0.696296	>	6.80857	28	42	14	9	0.666667	0.823529	0.756757	0.75	0.752688	1.8861e-06	0
KCNJ15	6.42374	6.26362	5.6009	5.92242	-0.454224	-0.77575	-0.341195	-0.662721	0.00113323	0.0215962	0.711018	0.000922454	0.0108609	0.729575	0.0480663	0.534255	0.686275	0.00242355	0.0450271	0.714947	0.00214454	0.0235954	0.734954	0.0533164	0.691419	0.688272	0.0664739	0.355157	0.701587	0.0378801	0.213194	0.716667	0.208575	0.651829	0.681481	<	5.57107	22	47	20	4	0.52381	0.921569	0.846154	0.701493	0.741935	1.89235e-06	0
ZNF24	6.33665	6.27393	6.80796	6.47121	0.153009	0.489757	0.197283	0.534032	1.60486e-05	0.00209692	0.764706	2.17718e-07	3.92108e-05	0.855392	0.0918204	0.594749	0.643791	0.000307063	0.0136173	0.755291	7.73327e-06	0.000538662	0.84375	0.179374	0.786727	0.637346	0.00121163	0.097276	0.787302	4.90635e-05	0.0153255	0.883333	0.0814666	0.52542	0.659259	>	6.62912	22	47	20	4	0.52381	0.921569	0.846154	0.701493	0.741935	1.89235e-06	0
ZNF496	4.86868	4.93911	5.15395	5.09682	0.207427	0.264553	0.157717	0.214842	5.4393e-06	0.00114199	0.752101	2.09689e-07	3.91766e-05	0.834967	0.00343219	0.396867	0.641612	1.71712e-05	0.00286058	0.769841	5.09885e-07	9.242e-05	0.851852	0.00477853	0.581574	0.660494	0.0224633	0.243396	0.709524	0.00175845	0.0577039	0.794444	0.152602	0.604926	0.596296	>	5.13211	22	47	20	4	0.52381	0.921569	0.846154	0.701493	0.741935	1.89235e-06	0
C9orf95	6.20023	6.06008	5.55494	6.25324	0.0942257	-0.604077	0.193159	-0.505144	0.0219885	0.122273	0.650327	5.80121e-05	0.00163111	0.794118	0.536111	0.880641	0.541394	0.0234222	0.1566	0.657407	0.000142362	0.00387285	0.798611	0.753557	0.969769	0.530864	0.309192	0.646487	0.633333	0.0121688	0.126966	0.783333	0.317195	0.729245	0.566667	<	5.46949	19	49	23	2	0.452381	0.960784	0.904762	0.680556	0.731183	1.92248e-06	0
MEX3A	6.02247	6.16836	6.92054	6.207	0.141625	0.855164	0.0386445	0.752184	2.77709e-06	0.000966553	0.750233	4.40832e-10	6.49036e-07	0.872549	0.189929	0.698338	0.587146	8.97533e-06	0.00255984	0.771825	4.87482e-09	5.12909e-06	0.887731	0.103471	0.734793	0.617284	0.0178551	0.224711	0.698413	0.000253237	0.0291757	0.836111	0.791254	0.942902	0.514815	>	6.65773	19	49	23	2	0.452381	0.960784	0.904762	0.680556	0.731183	1.92248e-06	0
C4orf27	5.48389	5.49685	5.77539	5.60938	0.121675	0.287683	0.112526	0.278533	4.63494e-05	0.00341908	0.71662	3.12644e-06	0.000225806	0.802288	0.0372247	0.505992	0.602397	0.000348832	0.0147599	0.715608	4.03916e-05	0.0016393	0.798611	0.0597352	0.695432	0.604938	0.0129094	0.198574	0.719048	0.00222136	0.0609934	0.811111	0.155366	0.608651	0.596296	>	5.74217	19	49	23	2	0.452381	0.960784	0.904762	0.680556	0.731183	1.92248e-06	0
C4orf46	5.81562	5.8354	6.60928	5.89985	0.0784183	0.787845	0.0644581	0.773884	7.43908e-05	0.00454642	0.706349	3.77721e-08	1.37291e-05	0.85049	0.548993	0.884061	0.514161	0.000366119	0.0152164	0.710317	5.06729e-07	9.242e-05	0.84838	0.546986	0.925743	0.526235	0.011734	0.190831	0.696825	0.000106055	0.0243695	0.855556	0.689774	0.907587	0.514815	>	6.46384	19	49	23	2	0.452381	0.960784	0.904762	0.680556	0.731183	1.92248e-06	0
SPRR1A	11.7467	9.5989	6.49024	10.1562	-0.958871	-4.62478	0.557252	-3.10866	1.29392e-06	0.000644862	0.767507	8.99689e-11	2.99762e-07	0.897059	0.180515	0.689086	0.594771	8.89108e-08	0.000272656	0.81746	1.86479e-12	3.16873e-08	0.93287	0.0245026	0.628517	0.66358	0.100898	0.419982	0.647619	0.000628423	0.0400425	0.811111	0.567597	0.858088	0.57037	<	6.23649	19	49	23	2	0.452381	0.960784	0.904762	0.680556	0.731183	1.92248e-06	0
SPNS2	6.02692	5.80951	5.32168	5.68713	-0.275851	-0.641292	-0.122389	-0.48783	1.74122e-05	0.00212525	0.778711	4.09919e-06	0.000272249	0.864379	0.0730113	0.570711	0.664488	2.18794e-05	0.00339062	0.784392	8.65903e-06	0.000580167	0.87037	0.0514494	0.68781	0.669753	0.00484057	0.144918	0.765079	3.43581e-05	0.0143733	0.85	0.355044	0.750681	0.651852	<	5.73522	36	32	6	19	0.857143	0.627451	0.654545	0.842105	0.731183	2.09462e-06	0
CUL2	6.48914	6.57517	6.83057	6.72435	0.209911	0.31613	0.149182	0.255401	0.00718952	0.0640489	0.695612	0.0109935	0.0588155	0.708333	0.0848278	0.586902	0.678649	0.00574658	0.0739253	0.710317	0.00858559	0.0588261	0.722222	0.0495106	0.678155	0.694444	0.173212	0.515971	0.660317	0.166516	0.436139	0.675	0.36243	0.75603	0.640741	>	6.53688	36	32	6	19	0.857143	0.627451	0.654545	0.842105	0.731183	2.09462e-06	0
POLR3C	7.0106	6.9724	7.41056	7.23113	0.231767	0.411194	0.258732	0.438159	8.11041e-05	0.00472697	0.733894	5.38436e-05	0.0015399	0.778595	0.0363021	0.505664	0.674292	0.000559196	0.0193816	0.728175	0.000301131	0.00629697	0.774306	0.0655311	0.703845	0.666667	0.00189911	0.110774	0.747619	0.000599076	0.0390629	0.788889	0.0527265	0.492587	0.692593	>	7.29492	29	41	13	10	0.690476	0.803922	0.74359	0.759259	0.752688	2.12641e-06	0
ACE	4.77975	4.84906	4.56836	4.57553	-0.224602	-0.23177	-0.273526	-0.280694	0.00157469	0.0265143	0.674603	0.00876041	0.0504696	0.678922	0.0290329	0.489406	0.668845	0.00952879	0.0980269	0.632275	0.029838	0.129447	0.633102	0.0721559	0.703845	0.631173	0.00110504	0.0944213	0.77619	0.00214528	0.0609809	0.788889	0.0119096	0.397188	0.759259	<	4.98145	42	19	0	32	1	0.372549	0.567568	1	0.655914	2.3287e-06	0
EXO1	6.49616	6.41135	7.18631	7.11668	0.64546	0.715099	0.705327	0.774965	1.64823e-06	0.000690972	0.786648	2.93022e-05	0.00102231	0.800654	0.000834253	0.378067	0.767974	8.38691e-06	0.00254565	0.781085	6.22473e-05	0.0022381	0.796296	0.0013709	0.581574	0.760802	0.000273362	0.0683097	0.8	0.000825888	0.0443594	0.811111	0.00685571	0.374986	0.785185	>	6.86332	30	40	12	11	0.714286	0.784314	0.731707	0.769231	0.752688	2.39114e-06	0
SPRR2C	5.66041	5.07385	3.49054	4.52853	-0.959366	-1.99736	-0.545321	-1.58331	0.000371765	0.0114658	0.741363	0.000116578	0.00265433	0.815359	0.108544	0.611101	0.642702	0.000293115	0.0134088	0.753968	8.80246e-05	0.00275383	0.827546	0.0763557	0.7099	0.655864	0.0436559	0.304404	0.711111	0.00645949	0.0942566	0.786111	0.442851	0.797772	0.611111	<	3.22131	26	44	16	7	0.619048	0.862745	0.787879	0.733333	0.752688	2.50084e-06	0
C1orf116	7.28513	6.97391	5.94681	6.75471	-0.438887	-1.24678	-0.219201	-1.02709	8.56818e-06	0.00147661	0.733427	4.39382e-07	5.77874e-05	0.809641	0.05062	0.537631	0.631808	1.49715e-05	0.00273054	0.75463	1.341e-06	0.000168604	0.819444	0.0289384	0.64222	0.66821	0.0194029	0.231558	0.68254	0.00193649	0.0594044	0.786111	0.387287	0.768919	0.544444	<	6.53841	26	44	16	7	0.619048	0.862745	0.787879	0.733333	0.752688	2.50084e-06	0
TBC1D2	7.55814	7.33489	6.42881	7.33141	-0.161072	-1.06367	-0.00347822	-0.906073	3.03735e-05	0.0027972	0.711018	5.0917e-09	3.76993e-06	0.852941	0.351016	0.798558	0.521786	6.93881e-05	0.00630517	0.728175	4.14634e-08	2.07913e-05	0.862269	0.235868	0.813708	0.549383	0.0395237	0.293724	0.669841	0.000326341	0.0330953	0.830556	0.988015	0.995656	0.544444	<	6.88636	26	44	16	7	0.619048	0.862745	0.787879	0.733333	0.752688	2.50084e-06	0
LOC153546	5.88431	6.00867	5.83282	5.34527	-0.575617	-0.0880698	-0.663404	-0.175856	0.0324334	0.154339	0.660131	0.58119	0.748691	0.591503	0.00076099	0.378067	0.751634	0.106338	0.353537	0.638889	0.78065	0.89156	0.574074	0.00583979	0.581574	0.725309	0.052853	0.326006	0.711111	0.389869	0.65627	0.633333	0.000613528	0.316797	0.814815	<	5.57431	26	44	16	7	0.619048	0.862745	0.787879	0.733333	0.752688	2.50084e-06	0
MIB1	5.92272	5.75822	6.18816	6.11424	0.239898	0.313818	0.35602	0.429939	0.000242952	0.00891167	0.747432	0.000813747	0.00994225	0.769608	0.0141439	0.447072	0.717865	0.00707798	0.0831125	0.712302	0.0116814	0.071677	0.737269	0.0792854	0.712037	0.679012	0.000121541	0.0554594	0.831746	0.000240815	0.0288848	0.847222	0.0007756	0.316797	0.811111	>	6.09282	26	44	16	7	0.619048	0.862745	0.787879	0.733333	0.752688	2.50084e-06	0
HAUS6	6.10325	5.76398	6.65225	6.31587	0.312402	0.648783	0.551886	0.888267	9.80592e-05	0.00528383	0.760971	6.21724e-05	0.0017167	0.795752	0.0543278	0.546085	0.714597	0.00488902	0.0677314	0.710979	0.00211736	0.0233987	0.748843	0.231459	0.81365	0.660494	1.05144e-05	0.037114	0.880952	7.37744e-06	0.0116132	0.908333	0.000443952	0.316797	0.844444	>	6.09825	34	35	8	16	0.809524	0.686275	0.68	0.813953	0.741935	2.69361e-06	0
TCTA	7.36855	7.34545	6.9212	6.99805	-0.36371	-0.44056	-0.347405	-0.424255	1.95595e-05	0.00220912	0.782446	0.000177299	0.00349496	0.772876	0.00166488	0.378067	0.795207	0.00013255	0.00889195	0.787037	0.000763237	0.0119763	0.777778	0.00397194	0.581574	0.799383	0.00311924	0.127375	0.771429	0.00642776	0.0940171	0.761111	0.00664696	0.37474	0.785185	<	6.99482	23	46	19	5	0.547619	0.901961	0.821429	0.707692	0.741935	2.97105e-06	0
HNRNPC	9.29686	9.24358	9.57346	9.4696	0.188409	0.292271	0.226021	0.329883	1.41934e-06	0.000644862	0.784781	8.03042e-07	8.91867e-05	0.814542	0.00304552	0.387853	0.745098	5.78812e-05	0.0056444	0.761905	2.46358e-05	0.00118104	0.791667	0.0141175	0.587968	0.722222	0.000218553	0.0632569	0.839683	6.36821e-05	0.0174393	0.869444	0.00893792	0.393563	0.8	>	9.48437	23	46	19	5	0.547619	0.901961	0.821429	0.707692	0.741935	2.97105e-06	0
LDOC1L	8.33706	8.38553	8.8404	8.62841	0.277094	0.489087	0.24288	0.454873	3.91807e-05	0.00321009	0.730626	7.83889e-06	0.000418452	0.792484	0.0178788	0.457052	0.648148	0.000165081	0.0101443	0.738095	3.39959e-05	0.00146698	0.799769	0.0238624	0.626662	0.655864	0.0147242	0.208317	0.712698	0.00345121	0.0726244	0.775	0.139337	0.590887	0.62963	>	8.78958	23	46	19	5	0.547619	0.901961	0.821429	0.707692	0.741935	2.97105e-06	0
ELL2	6.87651	6.90496	6.07281	6.48746	-0.397425	-0.812072	-0.417509	-0.832156	6.08171e-07	0.000486318	0.781513	2.65323e-07	4.14609e-05	0.803105	0.00113411	0.378067	0.752723	1.40739e-05	0.00273054	0.775794	6.31231e-06	0.000474396	0.797454	0.00294939	0.581574	0.746914	0.0011624	0.0946347	0.795238	0.000671424	0.0415412	0.816667	0.0066111	0.37474	0.766667	<	6.84588	35	33	7	18	0.833333	0.647059	0.660377	0.825	0.731183	2.99109e-06	0
HNRNPA0	8.60807	8.64715	9.13824	8.85894	0.239377	0.518683	0.211787	0.491094	4.38234e-08	0.000245735	0.806256	6.83538e-09	4.019e-06	0.852124	0.00201228	0.387853	0.745098	6.15147e-07	0.000723377	0.810847	1.27295e-07	4.10444e-05	0.855324	0.00279586	0.581574	0.751543	0.000622509	0.0818722	0.795238	0.000119811	0.0251064	0.844444	0.0231586	0.429203	0.72963	>	8.67211	35	33	7	18	0.833333	0.647059	0.660377	0.825	0.731183	2.99109e-06	0
C1orf112	6.04429	6.0694	6.93712	6.48881	0.437136	0.885451	0.419406	0.86772	5.49566e-06	0.00114199	0.757703	3.07849e-06	0.000223789	0.814542	0.0197773	0.467856	0.681917	1.79803e-05	0.00297061	0.771164	8.39189e-06	0.000572567	0.824074	0.0195196	0.620524	0.700617	0.00177039	0.108232	0.725397	0.00073495	0.0427344	0.791667	0.0672123	0.509456	0.637037	>	6.08044	38	28	4	23	0.904762	0.54902	0.622951	0.875	0.709677	3.13644e-06	0
TGS1	5.72853	5.63707	6.00979	5.93941	0.237777	0.308155	0.302336	0.372715	0.000469947	0.0129756	0.721755	0.00171715	0.0166396	0.730392	0.0139029	0.447072	0.71024	0.00513492	0.0695947	0.693783	0.0108767	0.06857	0.702546	0.048125	0.677709	0.682099	0.00214104	0.113262	0.788889	0.0046471	0.0820839	0.797222	0.00475726	0.36884	0.777778	>	5.80782	32	37	10	14	0.761905	0.72549	0.695652	0.787234	0.741935	3.40993e-06	0
CTCF	8.58726	8.61645	8.80136	8.78022	0.184371	0.205514	0.163767	0.184909	0.00493936	0.0514553	0.702614	0.0136135	0.0671045	0.715686	0.0423174	0.518453	0.685185	0.00947036	0.0978408	0.700397	0.0215345	0.10523	0.711806	0.0555546	0.692287	0.685185	0.0689279	0.361065	0.707937	0.0795796	0.306519	0.725	0.128603	0.581624	0.685185	>	8.70201	32	37	10	14	0.761905	0.72549	0.695652	0.787234	0.741935	3.40993e-06	0
FUT6	4.95375	4.75473	4.5049	4.61678	-0.278433	-0.390319	-0.137946	-0.249833	0.000129887	0.00622289	0.748366	0.000595279	0.00806795	0.802288	0.0214517	0.469558	0.676471	3.10914e-06	0.00158999	0.798942	2.60126e-05	0.00121784	0.836806	0.0016788	0.581574	0.748457	0.111798	0.436764	0.626984	0.114122	0.365962	0.719444	0.395509	0.774832	0.503704	<	4.37261	14	51	28	0	0.333333	1	1	0.64557	0.698925	3.56391e-06	0
SFN	12.3563	11.9527	10.9782	12.1202	-0.117384	-1.25946	0.167552	-0.97452	1.80563e-05	0.00213581	0.729692	1.1684e-09	1.45985e-06	0.883987	0.475353	0.86037	0.523965	1.30986e-05	0.00268835	0.766534	2.26765e-09	3.48712e-06	0.917824	0.157495	0.777981	0.564815	0.094826	0.4111	0.64127	0.00154809	0.0555618	0.802778	0.464047	0.808988	0.574074	<	11.1136	14	51	28	0	0.333333	1	1	0.64557	0.698925	3.56391e-06	0
CLCA2	9.39048	8.60302	6.29503	8.53951	-0.619369	-2.86385	-0.0635149	-2.30799	9.23026e-06	0.00152498	0.697479	6.78699e-09	4.019e-06	0.78268	0.101072	0.604564	0.583878	1.43972e-05	0.00273054	0.731481	3.00449e-08	1.75457e-05	0.799769	0.0321119	0.650748	0.640432	0.0611804	0.344816	0.615873	0.00333716	0.0715684	0.741667	0.912447	0.976977	0.551852	<	5.50036	14	51	28	0	0.333333	1	1	0.64557	0.698925	3.56391e-06	0
HAS1	4.59005	4.8041	4.48753	4.41309	-0.239918	-0.165478	-0.39101	-0.31657	0.0343571	0.159321	0.687208	0.159321	0.340639	0.687908	0.0224153	0.469558	0.686275	0.139178	0.405643	0.67791	0.361323	0.594225	0.679398	0.0252155	0.628517	0.675926	0.0295979	0.265333	0.709524	0.114611	0.366706	0.708333	0.0202808	0.416279	0.711111	<	4.20244	14	51	28	0	0.333333	1	1	0.64557	0.698925	3.56391e-06	0
CTRB2	5.22669	5.2477	5.07838	5.1576	-0.0752711	-0.154485	-0.0901066	-0.16932	0.00305645	0.0391676	0.659197	0.00184897	0.017427	0.70915	0.0999247	0.603321	0.592593	0.0132125	0.11708	0.647487	0.00789048	0.0557972	0.697917	0.167351	0.783854	0.580247	0.0333507	0.274457	0.687302	0.0239141	0.171949	0.736111	0.133298	0.585156	0.622222	<	5.01404	14	51	28	0	0.333333	1	1	0.64557	0.698925	3.56391e-06	0
AKR1B10	11.1097	9.39742	7.05677	11.0833	0.477222	-3.54935	1.68592	-2.34066	0.00309862	0.0395032	0.633053	2.12319e-07	3.92108e-05	0.811275	0.454999	0.850432	0.604575	0.00078789	0.0240286	0.672619	6.05759e-08	2.5566e-05	0.840278	0.967471	0.997819	0.550926	0.53263	0.797455	0.538095	0.0150778	0.139805	0.741667	0.0601738	0.500574	0.733333	<	5.43957	14	51	28	0	0.333333	1	1	0.64557	0.698925	3.56391e-06	0
SPRR1B	11.4846	9.85673	6.28986	9.7956	-1.21019	-4.71593	-0.0611352	-3.56688	3.36053e-07	0.000373224	0.762372	1.74817e-11	1.39558e-07	0.888889	0.072297	0.569823	0.593682	1.57783e-07	0.000286749	0.800926	7.27335e-12	4.52162e-08	0.920139	0.0149575	0.599228	0.641975	0.0359099	0.282405	0.669841	0.000264084	0.0294933	0.813889	0.95002	0.986742	0.522222	<	5.24247	14	51	28	0	0.333333	1	1	0.64557	0.698925	3.56391e-06	0
GPC2	4.61829	4.51704	4.97557	4.71567	0.127165	0.387057	0.198639	0.458531	7.90953e-06	0.00141178	0.753501	5.52139e-08	1.72466e-05	0.836601	0.0652295	0.562668	0.642702	0.000312411	0.0137262	0.728175	3.22146e-06	0.000301398	0.818287	0.18312	0.789295	0.608025	0.00045054	0.0797171	0.814286	2.09118e-05	0.0131234	0.880556	0.0437524	0.48508	0.725926	>	5.01219	14	51	28	0	0.333333	1	1	0.64557	0.698925	3.56391e-06	0
FUS	6.0312	6.01982	6.34192	6.11148	0.0836262	0.314064	0.09166	0.322097	5.23348e-05	0.00363099	0.736228	4.37938e-08	1.45914e-05	0.855392	0.171144	0.680683	0.577342	0.000415778	0.0161708	0.737434	7.36214e-07	0.000116807	0.857639	0.229704	0.813506	0.57716	0.0110827	0.186599	0.733333	0.000245966	0.0290953	0.85	0.336534	0.740686	0.577778	>	6.37766	14	51	28	0	0.333333	1	1	0.64557	0.698925	3.56391e-06	0
CCDC34	5.53826	5.48076	6.06594	5.8023	0.280956	0.544596	0.321539	0.585179	4.46549e-05	0.00336867	0.709617	1.04173e-05	0.000505466	0.760621	0.0201575	0.468942	0.641612	0.000476646	0.0175158	0.699074	0.000111062	0.00330042	0.747685	0.0439307	0.673218	0.634259	0.00443297	0.140666	0.734921	0.00145524	0.0543771	0.791667	0.0549915	0.494369	0.659259	>	6.12538	14	51	28	0	0.333333	1	1	0.64557	0.698925	3.56391e-06	0
PRKD3	5.24542	5.38807	5.69545	5.39307	0.105689	0.408077	0.00499727	0.307385	0.000119978	0.00599621	0.695612	1.68147e-06	0.000148735	0.802288	0.197113	0.705553	0.553377	0.000102888	0.00762645	0.730159	2.67744e-06	0.000269165	0.822917	0.0988569	0.734793	0.606481	0.0980163	0.415872	0.612698	0.00754976	0.100151	0.752778	0.96097	0.990029	0.574074	>	5.7305	14	51	28	0	0.333333	1	1	0.64557	0.698925	3.56391e-06	0
TMEM108	4.36325	4.65453	5.19196	4.46581	0.01689	0.743043	-0.188719	0.537434	0.000324236	0.0105196	0.635854	1.14332e-07	2.85701e-05	0.758987	0.861393	0.968916	0.528322	0.000169994	0.0101443	0.681217	1.7086e-07	4.61577e-05	0.791667	0.284551	0.83809	0.533951	0.266441	0.612343	0.526984	0.016676	0.146956	0.680556	0.194427	0.640557	0.677778	>	5.25841	14	51	28	0	0.333333	1	1	0.64557	0.698925	3.56391e-06	0
POLR3E	5.92208	5.86172	6.12901	5.96924	0.0649155	0.22469	0.107521	0.267295	0.00681187	0.062262	0.63212	0.00114265	0.0125709	0.686275	0.267935	0.753694	0.559913	0.0347305	0.195247	0.615741	0.00763367	0.0544111	0.672454	0.455636	0.904183	0.540123	0.0383697	0.289452	0.671429	0.0167631	0.146983	0.719444	0.198229	0.643777	0.607407	>	6.20493	14	51	28	0	0.333333	1	1	0.64557	0.698925	3.56391e-06	0
GPRC5A	8.24675	8.83094	7.28801	7.8959	-0.522669	-1.13056	-0.935039	-1.54293	0.000478893	0.0130944	0.746499	0.000203342	0.00383854	0.812908	0.101617	0.605624	0.657952	0.0142147	0.121002	0.699074	0.00555955	0.0441736	0.760417	0.335723	0.865517	0.617284	4.41745e-05	0.037114	0.860317	6.77349e-06	0.0116132	0.938889	0.00174121	0.317632	0.755556	<	8.06206	31	38	11	13	0.738095	0.745098	0.704545	0.77551	0.741935	3.78668e-06	0
DTL	7.83092	7.61507	8.58999	8.3552	0.587766	0.822555	0.740131	0.97492	1.76772e-06	0.000721193	0.772642	7.67906e-06	0.000411561	0.805556	0.00278036	0.387853	0.728758	1.60425e-05	0.00279768	0.76918	2.55921e-05	0.00120379	0.799769	0.00524119	0.581574	0.728395	0.000111235	0.0542365	0.780952	0.000236941	0.0288822	0.819444	0.00712332	0.377587	0.72963	>	8.16502	31	38	11	13	0.738095	0.745098	0.704545	0.77551	0.741935	3.78668e-06	0
DEK	10.7204	11.0892	11.3609	11.0377	0.208876	0.532093	-0.0514629	0.271755	0.000127519	0.0061809	0.73436	1.7634e-05	0.000732892	0.799837	0.100508	0.603891	0.647059	2.66096e-06	0.00149789	0.804233	2.73805e-07	6.08183e-05	0.868056	0.00783811	0.581574	0.719136	0.376772	0.699809	0.566667	0.107824	0.355283	0.636111	0.763671	0.933768	0.525926	>	10.9956	31	38	11	13	0.738095	0.745098	0.704545	0.77551	0.741935	3.78668e-06	0
DYM	5.77075	5.73454	6.02569	5.84158	0.0814742	0.265586	0.107039	0.29115	0.000843828	0.0179648	0.715219	0.000100085	0.00243702	0.775327	0.181034	0.689834	0.635076	0.00647477	0.0786852	0.688492	0.00116261	0.0159737	0.75	0.306455	0.848695	0.606481	0.0115539	0.189478	0.779365	0.00284705	0.0667994	0.836111	0.121711	0.573704	0.703704	>	5.85297	31	38	11	13	0.738095	0.745098	0.704545	0.77551	0.741935	3.78668e-06	0
NUP107	8.76635	8.798	9.33918	9.36437	0.588712	0.563523	0.566371	0.541183	3.37691e-06	0.000992762	0.774977	2.06006e-05	0.000809717	0.785131	0.000336498	0.378067	0.761438	3.2165e-05	0.00401882	0.771164	0.000101052	0.00306304	0.78125	0.00121471	0.581574	0.757716	0.00252679	0.117409	0.784127	0.00158424	0.0556031	0.794444	0.0132549	0.399667	0.77037	>	8.76395	39	26	3	25	0.928571	0.509804	0.609375	0.896552	0.698925	3.83168e-06	0
ZNF281	7.67539	7.80599	8.02563	8.06016	0.346358	0.311827	0.254172	0.219641	0.000201668	0.00794783	0.729225	0.003558	0.0272053	0.727124	0.00506208	0.410689	0.732026	0.000110649	0.00792823	0.753307	0.00188941	0.0217143	0.748843	0.00312418	0.581574	0.759259	0.0335074	0.274457	0.671429	0.0747452	0.29689	0.675	0.0749588	0.520918	0.666667	>	7.63185	39	26	3	25	0.928571	0.509804	0.609375	0.896552	0.698925	3.83168e-06	0
UBTD1	5.79825	5.72355	5.38587	5.51145	-0.264822	-0.390403	-0.212092	-0.337673	1.31963e-06	0.000644862	0.77591	2.32407e-06	0.000187341	0.811275	0.00248332	0.387853	0.728758	5.304e-06	0.00201048	0.789683	8.43032e-06	0.000573233	0.820602	0.0031729	0.581574	0.748457	0.00316858	0.127549	0.742857	0.00128123	0.051432	0.788889	0.0448579	0.485421	0.681481	<	5.66621	34	34	8	17	0.809524	0.666667	0.666667	0.809524	0.731183	4.10513e-06	0
KIAA1539	6.85519	6.82058	6.48757	6.56538	-0.279623	-0.35744	-0.255194	-0.333011	7.11422e-06	0.00132916	0.768908	3.00887e-05	0.00103345	0.794118	0.00321695	0.387853	0.735294	3.33964e-05	0.00412116	0.766534	9.76983e-05	0.00298181	0.796296	0.00539509	0.581574	0.726852	0.00227786	0.115019	0.774603	0.00173906	0.0574296	0.788889	0.027291	0.443197	0.755556	<	6.72108	34	34	8	17	0.809524	0.666667	0.666667	0.809524	0.731183	4.10513e-06	0
MGA	5.39379	5.39687	5.7524	5.53728	0.142578	0.357701	0.140404	0.355527	3.22207e-05	0.00286277	0.750233	5.16717e-06	0.000317871	0.80719	0.0639689	0.557942	0.674292	0.000150254	0.00968941	0.740079	2.58245e-05	0.00121187	0.802083	0.0773057	0.709954	0.657407	0.00405916	0.13881	0.774603	0.000824768	0.0443594	0.819444	0.131249	0.58453	0.714815	>	5.44175	34	34	8	17	0.809524	0.666667	0.666667	0.809524	0.731183	4.10513e-06	0
CCDC112	3.26296	3.4679	3.62237	3.59292	0.269679	0.299136	0.125021	0.154478	9.90011e-05	0.00528892	0.745565	0.00163668	0.0161367	0.734477	0.00131985	0.378067	0.760349	1.18686e-05	0.00268835	0.793651	0.000400692	0.0076297	0.778935	5.03724e-05	0.503497	0.813272	0.184961	0.530876	0.630159	0.263532	0.541947	0.627778	0.190889	0.638982	0.633333	>	3.47767	34	34	8	17	0.809524	0.666667	0.666667	0.809524	0.731183	4.10513e-06	0
ZBTB24	4.95771	5.24764	5.50951	5.19156	0.148572	0.466522	-0.0560839	0.261867	0.00690747	0.0628666	0.75817	0.0026923	0.0225668	0.794118	0.339185	0.792886	0.71024	8.1341e-05	0.00682275	0.789021	1.83388e-05	0.000965379	0.820602	0.0219317	0.620524	0.746914	0.53404	0.797902	0.684127	0.300541	0.576816	0.730556	0.822606	0.952087	0.622222	>	4.87363	40	24	2	27	0.952381	0.470588	0.597015	0.923077	0.688172	4.40586e-06	0
CSF3	5.77575	5.9455	5.60789	5.56595	-0.259725	-0.217784	-0.379549	-0.337609	0.000136045	0.00636928	0.693978	0.00453296	0.0321684	0.663807	0.00428368	0.403314	0.734205	0.00183789	0.0381926	0.651455	0.0203355	0.101632	0.614583	0.015868	0.607694	0.700617	1.22775e-05	0.037114	0.796032	0.000402249	0.0360922	0.781944	0.00109855	0.316797	0.814815	<	5.80861	40	24	2	27	0.952381	0.470588	0.597015	0.923077	0.688172	4.40586e-06	0
NSL1	6.74502	6.69165	7.03273	6.92144	0.192121	0.303412	0.229791	0.341081	5.03531e-06	0.00114199	0.772642	1.0326e-05	0.000502256	0.805556	0.00445828	0.403314	0.728758	0.000119665	0.00824907	0.746693	0.000153927	0.00409196	0.777778	0.0159823	0.608082	0.705247	0.00028493	0.0692688	0.834921	0.00032784	0.0330953	0.872222	0.00492786	0.36884	0.785185	>	6.97043	24	45	18	6	0.571429	0.882353	0.8	0.714286	0.741935	4.46604e-06	0
BLM	6.41786	6.44362	6.93316	6.83852	0.413084	0.507722	0.394899	0.489537	0.000143437	0.00647852	0.74183	0.000979002	0.011222	0.73366	0.00507955	0.410689	0.752723	0.000787129	0.0240286	0.736772	0.00360267	0.0330273	0.728009	0.0118203	0.583792	0.748457	0.00628207	0.158656	0.753968	0.0133783	0.131905	0.747222	0.00539732	0.370307	0.762963	>	6.87795	24	45	18	6	0.571429	0.882353	0.8	0.714286	0.741935	4.46604e-06	0
HMGB2	7.08763	7.14821	7.49643	7.30666	0.20121	0.390984	0.158447	0.348221	2.56616e-05	0.00255225	0.733894	1.36599e-05	0.000616423	0.786765	0.0251656	0.480692	0.663399	7.46059e-05	0.00657025	0.738095	4.40255e-05	0.00176023	0.78588	0.0255485	0.630544	0.674383	0.00899561	0.174933	0.72381	0.00285028	0.0667994	0.788889	0.126329	0.577874	0.637037	>	7.46548	24	45	18	6	0.571429	0.882353	0.8	0.714286	0.741935	4.46604e-06	0
SKIV2L2	6.26372	6.28576	6.50205	6.41373	0.143533	0.231855	0.127974	0.216296	0.000471018	0.0129756	0.720822	0.00051304	0.00726873	0.753268	0.025179	0.480692	0.67756	0.00195121	0.0394804	0.727513	0.00214461	0.0235954	0.759259	0.0427604	0.668977	0.685185	0.0281805	0.263083	0.704762	0.0189976	0.155635	0.738889	0.0871956	0.534046	0.659259	>	6.4392	24	45	18	6	0.571429	0.882353	0.8	0.714286	0.741935	4.46604e-06	0
GNA14	4.48401	4.59537	4.21452	4.20539	-0.31137	-0.302244	-0.389977	-0.380851	8.94419e-05	0.00499924	0.715686	0.00227977	0.0200683	0.712418	0.00387198	0.399534	0.720044	0.000619756	0.0206149	0.691799	0.00725266	0.0528574	0.689815	0.00911575	0.581574	0.694444	0.000190549	0.0614398	0.773016	0.00272626	0.0653158	0.766667	0.00252235	0.347555	0.781481	<	4.63963	41	21	1	30	0.97619	0.411765	0.577465	0.954545	0.666667	4.66602e-06	0
SFRS7	7.9828	8.05819	8.35101	8.13336	0.128386	0.346033	0.0751729	0.29282	1.01242e-05	0.00161915	0.773576	1.63975e-07	3.52475e-05	0.836601	0.0439521	0.522981	0.689542	2.1303e-05	0.00336027	0.798942	5.13162e-07	9.242e-05	0.857639	0.0284343	0.641087	0.720679	0.0268835	0.258432	0.712698	0.00259944	0.0644133	0.786111	0.407514	0.779896	0.614815	>	8.17266	26	43	16	8	0.619048	0.843137	0.764706	0.728814	0.741935	4.67955e-06	0
NAP1L4	5.94117	5.88816	6.2257	6.09091	0.165328	0.300122	0.202742	0.337535	1.49483e-05	0.00203287	0.747899	8.23294e-06	0.000433117	0.780229	0.00519313	0.410689	0.704793	0.000409833	0.0160647	0.728836	0.000209234	0.0049324	0.761574	0.0238718	0.626662	0.685185	0.00158921	0.105676	0.793651	0.00104357	0.0478688	0.825	0.00947058	0.393563	0.751852	>	6.0987	26	43	16	8	0.619048	0.843137	0.764706	0.728814	0.741935	4.67955e-06	0
MTX3	6.10213	6.03803	6.33942	6.2363	0.153029	0.256143	0.198276	0.30139	0.000425304	0.0121777	0.735294	0.000343737	0.00550172	0.780229	0.0355326	0.503424	0.675381	0.0043127	0.0634401	0.722884	0.00284868	0.0283323	0.769676	0.0930879	0.729833	0.660494	0.00426126	0.139763	0.765079	0.00277664	0.0656903	0.805556	0.0337943	0.461779	0.711111	>	6.24675	26	43	16	8	0.619048	0.843137	0.764706	0.728814	0.741935	4.67955e-06	0
LZTFL1	5.20546	5.23769	5.50149	5.33799	0.123048	0.286554	0.100293	0.2638	0.00032948	0.0105724	0.728291	4.40769e-05	0.00135352	0.785948	0.0844279	0.586902	0.651416	0.00110216	0.0284554	0.72619	0.000205855	0.00488167	0.784722	0.0989222	0.734793	0.648148	0.0324152	0.272897	0.733333	0.00660095	0.0949349	0.788889	0.277268	0.706547	0.659259	>	5.37424	26	43	16	8	0.619048	0.843137	0.764706	0.728814	0.741935	4.67955e-06	0
OAF	5.73751	5.71894	5.44837	5.59808	-0.133966	-0.283681	-0.120858	-0.270572	3.95074e-05	0.00321253	0.738095	8.76791e-06	0.000456456	0.797386	0.0317631	0.4945	0.659041	0.000283947	0.0132577	0.728836	8.78646e-05	0.00275314	0.780093	0.0517647	0.68781	0.660494	0.00744743	0.168609	0.760317	0.0015411	0.0555053	0.838889	0.0986881	0.546049	0.655556	<	5.56466	26	43	16	8	0.619048	0.843137	0.764706	0.728814	0.741935	4.67955e-06	0
PLSCR4	7.49928	7.22813	6.84371	7.0741	-0.345436	-0.57582	-0.154035	-0.384419	0.0018418	0.0290145	0.719421	0.000931483	0.0109201	0.762255	0.0931735	0.595357	0.662309	0.00107627	0.0280518	0.740079	0.000496416	0.00884479	0.780093	0.0571662	0.692808	0.686728	0.184014	0.529451	0.669841	0.0687142	0.283836	0.719444	0.56319	0.856047	0.603704	<	6.85132	26	43	16	8	0.619048	0.843137	0.764706	0.728814	0.741935	4.67955e-06	0
LOC100287241	4.96418	5.02287	4.83537	4.84692	-0.13452	-0.146078	-0.17595	-0.187508	0.000418186	0.0121432	0.739029	0.00272936	0.0227724	0.718954	0.00230686	0.387853	0.765795	0.00554463	0.0728714	0.722222	0.0171526	0.0919017	0.704861	0.0121148	0.584174	0.74537	0.00484216	0.144918	0.779365	0.015563	0.142194	0.752778	0.00465538	0.36884	0.814815	<	4.79794	20	48	22	3	0.47619	0.941176	0.869565	0.685714	0.731183	4.86272e-06	0
TMSB15A	5.69735	5.90254	8.50026	6.10321	0.34551	2.74256	0.200672	2.59772	5.51682e-06	0.00114199	0.731559	8.1866e-11	2.99762e-07	0.872549	0.344932	0.79574	0.543573	4.16291e-05	0.00454758	0.739418	3.76269e-09	4.70124e-06	0.872685	0.312802	0.851823	0.561728	0.00992413	0.181365	0.712698	2.91142e-05	0.0143733	0.872222	0.693011	0.908929	0.5	>	7.50381	20	48	22	3	0.47619	0.941176	0.869565	0.685714	0.731183	4.86272e-06	0
C10orf99	6.72308	5.22156	4.0898	5.53478	-0.746676	-2.19166	0.313225	-1.13176	0.000134703	0.0063361	0.739963	1.01763e-05	0.000498613	0.845588	0.163815	0.672357	0.599129	8.46045e-06	0.00254565	0.78836	8.39823e-07	0.000126232	0.878472	0.0344626	0.651192	0.66821	0.320962	0.657195	0.62381	0.0325508	0.198227	0.766667	0.590483	0.8652	0.566667	<	3.38693	16	50	26	1	0.380952	0.980392	0.941176	0.657895	0.709677	5.07093e-06	0
SDC1	11.2102	10.9368	10.3276	10.9311	-0.198695	-0.802248	-0.00571845	-0.609272	4.56095e-05	0.00338952	0.724556	4.69115e-07	5.93012e-05	0.80719	0.148729	0.655731	0.614379	2.91546e-05	0.0038344	0.757937	4.84572e-07	9.08538e-05	0.832176	0.0475031	0.677709	0.658951	0.0932567	0.408847	0.644444	0.00936667	0.111524	0.747222	0.975187	0.992564	0.507407	<	10.3204	16	50	26	1	0.380952	0.980392	0.941176	0.657895	0.709677	5.07093e-06	0
CSTB	9.99237	9.53397	9.04649	9.55437	-0.303176	-0.811058	0.0204052	-0.487477	0.000114402	0.00582993	0.691877	9.44375e-06	0.000479162	0.779412	0.103085	0.607029	0.575163	1.65223e-05	0.00282305	0.741402	1.54858e-06	0.000185233	0.818287	0.0223365	0.620524	0.638889	0.221701	0.570548	0.573016	0.0413845	0.222517	0.686111	0.930326	0.980219	0.577778	<	8.90289	16	50	26	1	0.380952	0.980392	0.941176	0.657895	0.709677	5.07093e-06	0
DUOX1	4.37798	4.30003	3.89191	4.27166	-0.0833911	-0.463141	-0.0283654	-0.408115	2.15211e-05	0.0023382	0.752101	5.58637e-09	3.77062e-06	0.887255	0.317001	0.777133	0.571895	3.83663e-05	0.00438275	0.775132	1.26527e-08	1.05392e-05	0.896991	0.227943	0.813349	0.612654	0.0226005	0.24382	0.696825	0.000129663	0.0253667	0.863889	0.805612	0.946405	0.525926	<	3.87637	16	50	26	1	0.380952	0.980392	0.941176	0.657895	0.709677	5.07093e-06	0
RBM12	7.68147	7.71514	8.10662	7.8831	0.191726	0.41525	0.167953	0.391477	1.65908e-06	0.000690972	0.758637	1.57139e-07	3.41453e-05	0.821895	0.0103913	0.430742	0.674292	1.53717e-05	0.0027437	0.767857	2.11965e-06	0.000227817	0.826389	0.0155942	0.604936	0.689815	0.0031267	0.127375	0.736508	0.000441576	0.0364774	0.811111	0.077165	0.522087	0.637037	>	8.14085	16	50	26	1	0.380952	0.980392	0.941176	0.657895	0.709677	5.07093e-06	0
C2orf44	5.87361	5.99935	6.43199	6.15542	0.244827	0.5214	0.156068	0.432641	4.64186e-06	0.00113165	0.745098	1.22224e-07	2.90879e-05	0.829248	0.0157402	0.447072	0.632898	1.44285e-05	0.00273054	0.765212	6.49651e-07	0.000109136	0.844907	0.0137938	0.587968	0.658951	0.0201508	0.233305	0.696825	0.00170046	0.0567635	0.791667	0.266816	0.700003	0.57037	>	6.40506	16	50	26	1	0.380952	0.980392	0.941176	0.657895	0.709677	5.07093e-06	0
SFRS1	8.32517	8.33397	8.71425	8.48979	0.162039	0.38649	0.155825	0.380276	1.84878e-05	0.00215175	0.732026	1.45884e-07	3.28807e-05	0.822712	0.0324067	0.495355	0.611111	0.000163339	0.0101127	0.740079	2.54471e-06	0.000259806	0.827546	0.0524092	0.688378	0.623457	0.0114108	0.188754	0.712698	0.000885377	0.0450125	0.811111	0.188105	0.636388	0.581481	>	8.71052	16	50	26	1	0.380952	0.980392	0.941176	0.657895	0.709677	5.07093e-06	0
ZNF704	3.30794	3.31864	3.81855	3.38826	0.0771689	0.507461	0.0696206	0.499913	7.57065e-05	0.00456787	0.711018	3.24409e-07	4.66566e-05	0.809641	0.184473	0.692275	0.579521	0.000571195	0.0196137	0.715608	8.17886e-06	0.000563806	0.8125	0.199662	0.799973	0.58642	0.0247681	0.250681	0.7	0.00272816	0.0653158	0.802778	0.400537	0.77567	0.562963	>	3.74357	16	50	26	1	0.380952	0.980392	0.941176	0.657895	0.709677	5.07093e-06	0
PROX1	4.04218	4.22527	5.27042	4.21082	0.114791	1.17439	-0.0144463	1.04515	3.05032e-05	0.0027972	0.710551	2.87896e-08	1.10679e-05	0.811275	0.176906	0.685963	0.576253	0.000146216	0.00957318	0.76455	8.11137e-07	0.000125701	0.850694	0.0734807	0.707541	0.649691	0.0487101	0.317262	0.580952	0.00341246	0.0721889	0.716667	0.891609	0.972032	0.6	>	4.64204	16	50	26	1	0.380952	0.980392	0.941176	0.657895	0.709677	5.07093e-06	0
H2BFXP	3.45765	3.50231	4.15171	3.59653	0.125745	0.680925	0.0942225	0.649402	2.91124e-05	0.00273342	0.706816	8.67974e-09	4.59036e-06	0.843137	0.183407	0.690966	0.525054	0.000234906	0.0118586	0.724206	4.29292e-07	8.58197e-05	0.84375	0.200657	0.799973	0.564815	0.0226889	0.24382	0.665079	0.000710792	0.0425432	0.841667	0.522533	0.837872	0.57037	>	3.95041	16	50	26	1	0.380952	0.980392	0.941176	0.657895	0.709677	5.07093e-06	0
ZNF195	6.5489	6.64009	7.21249	6.74841	0.172684	0.636768	0.108319	0.572403	5.54264e-05	0.00378167	0.70028	6.11999e-07	7.19675e-05	0.806373	0.129325	0.638276	0.558824	0.000157336	0.00989092	0.71164	3.15146e-06	0.000301398	0.814815	0.101851	0.734793	0.574074	0.0302473	0.267673	0.673016	0.00271811	0.0653158	0.786111	0.487074	0.819626	0.522222	>	7.24333	16	50	26	1	0.380952	0.980392	0.941176	0.657895	0.709677	5.07093e-06	0
FLJ22536	3.80884	3.85698	4.07865	4.00045	0.177456	0.255649	0.14347	0.221662	7.09854e-05	0.00446248	0.696545	5.74078e-06	0.000343605	0.780229	0.009879	0.427184	0.584967	0.00019047	0.0106957	0.713624	1.15705e-05	0.000711713	0.799769	0.0117201	0.583792	0.598765	0.0473346	0.313749	0.655556	0.0140688	0.13545	0.733333	0.210699	0.654322	0.551852	>	4.15384	16	50	26	1	0.380952	0.980392	0.941176	0.657895	0.709677	5.07093e-06	0
CP110	5.61359	5.69243	6.02422	5.73413	0.0973516	0.387439	0.0416998	0.331787	0.00104276	0.0205718	0.674603	2.2254e-05	0.000844175	0.76634	0.228073	0.724976	0.552288	0.00231156	0.0439173	0.688492	0.000112158	0.0033118	0.780093	0.193404	0.795021	0.566358	0.116668	0.443322	0.64127	0.0198827	0.158042	0.733333	0.721019	0.920074	0.518519	>	6.03974	16	50	26	1	0.380952	0.980392	0.941176	0.657895	0.709677	5.07093e-06	0
EFR3A	9.68294	9.58045	9.16745	9.44431	-0.208486	-0.485345	-0.136142	-0.413	3.75893e-05	0.00314451	0.74183	1.44863e-05	0.000639282	0.787582	0.0360676	0.505664	0.680828	7.13721e-05	0.00639821	0.761905	3.6932e-05	0.00155107	0.802083	0.0245077	0.628517	0.708333	0.0209397	0.236388	0.693651	0.00746333	0.0996656	0.752778	0.20831	0.651725	0.614815	<	9.25423	21	47	21	4	0.5	0.921569	0.84	0.691176	0.731183	5.17743e-06	0
CYP26B1	4.92639	4.90782	4.70242	4.50745	-0.413479	-0.218515	-0.400372	-0.205408	0.00362123	0.0428851	0.699346	0.077473	0.213888	0.653595	0.00137559	0.378067	0.760349	0.00896289	0.0944961	0.694444	0.107211	0.291521	0.65162	0.00335769	0.581574	0.751543	0.0513717	0.32273	0.711111	0.215674	0.493945	0.658333	0.00810567	0.384894	0.781481	<	4.47905	21	47	21	4	0.5	0.921569	0.84	0.691176	0.731183	5.17743e-06	0
GTF3C4	6.02397	5.94063	6.44364	6.26546	0.266003	0.444174	0.324831	0.503002	3.30887e-06	0.000992762	0.765173	2.61096e-06	0.000203889	0.816176	0.00584601	0.410689	0.697168	4.29995e-05	0.00464651	0.75	1.76007e-05	0.000943315	0.810185	0.0126171	0.584174	0.669753	0.000492011	0.0797171	0.801587	0.000336771	0.033351	0.830556	0.0177459	0.410289	0.762963	>	6.36051	21	47	21	4	0.5	0.921569	0.84	0.691176	0.731183	5.17743e-06	0
MCM6	6.6384	6.72287	7.27819	6.87948	0.216235	0.614941	0.156613	0.555319	1.75967e-05	0.00212525	0.763305	1.20801e-06	0.000120019	0.83415	0.0557814	0.546421	0.668845	1.60939e-05	0.00279768	0.774471	8.37997e-07	0.000126232	0.850694	0.0191271	0.620524	0.67284	0.0211631	0.237707	0.736508	0.00503691	0.0854166	0.794444	0.347712	0.746586	0.659259	>	7.07968	21	47	21	4	0.5	0.921569	0.84	0.691176	0.731183	5.17743e-06	0
MYL6B	8.07953	8.21435	8.92311	8.3289	0.209716	0.803929	0.114547	0.70876	4.08079e-05	0.00325016	0.729692	3.73495e-07	5.20497e-05	0.830882	0.17458	0.683917	0.594771	0.000120404	0.0082715	0.73545	2.42176e-06	0.000250931	0.831019	0.147112	0.771425	0.608025	0.0178614	0.224711	0.715873	0.000488198	0.0373929	0.830556	0.522206	0.837729	0.562963	>	8.68681	21	47	21	4	0.5	0.921569	0.84	0.691176	0.731183	5.17743e-06	0
ZNF187	5.92477	6.28199	6.61594	6.13467	0.104836	0.586109	-0.147323	0.33395	3.48997e-05	0.00299151	0.712418	7.25213e-08	2.10112e-05	0.84232	0.312979	0.775387	0.539216	3.32283e-06	0.00158999	0.777778	1.45551e-08	1.15593e-05	0.892361	0.0578034	0.692808	0.625	0.307708	0.645272	0.555556	0.00808812	0.104176	0.722222	0.179648	0.628515	0.666667	>	6.43196	21	47	21	4	0.5	0.921569	0.84	0.691176	0.731183	5.17743e-06	0
C9orf123	7.12858	6.95109	7.39339	7.23536	0.158988	0.317016	0.28427	0.442298	0.00601802	0.0580176	0.652661	0.00317311	0.0251893	0.684641	0.128594	0.637263	0.610022	0.0568332	0.254076	0.623677	0.0290007	0.127195	0.659722	0.360207	0.873677	0.575617	0.0070639	0.165251	0.722222	0.00441559	0.0812201	0.744444	0.0305898	0.451307	0.692593	>	7.45477	21	47	21	4	0.5	0.921569	0.84	0.691176	0.731183	5.17743e-06	0
ACE2	4.8764	4.23397	3.88912	4.23973	-0.447719	-0.798337	0.00576017	-0.344857	0.00599579	0.0578764	0.714286	0.00528658	0.0357403	0.767974	0.144436	0.651026	0.642702	0.00150109	0.034256	0.742725	0.00176663	0.0207819	0.788194	0.0554217	0.692287	0.682099	0.526659	0.793526	0.646032	0.304833	0.580429	0.719444	0.986198	0.995159	0.548148	<	3.48399	18	49	24	2	0.428571	0.960784	0.9	0.671233	0.72043	5.18771e-06	0
CDKN1A	5.95295	5.8871	5.59767	5.7368	-0.196791	-0.335913	-0.150308	-0.28943	3.49681e-06	0.00100609	0.75817	1.2074e-06	0.000120019	0.801471	0.00586056	0.410689	0.700436	8.53177e-06	0.00254565	0.775132	2.6794e-06	0.000269165	0.814815	0.00480006	0.581574	0.722222	0.0114885	0.189026	0.71746	0.00348577	0.0728818	0.769444	0.131429	0.58453	0.648148	<	5.60021	18	49	24	2	0.428571	0.960784	0.9	0.671233	0.72043	5.18771e-06	0
PTMA	11.4783	11.5807	11.9317	11.6321	0.12368	0.423338	0.0513481	0.351006	3.05518e-06	0.000967176	0.758637	2.193e-08	8.76805e-06	0.848856	0.0827518	0.586902	0.638344	9.21959e-06	0.00255984	0.773148	1.97949e-07	5.0091e-05	0.855324	0.0576323	0.692808	0.66358	0.0111112	0.186816	0.72381	0.000179626	0.0265978	0.833333	0.49669	0.825486	0.577778	>	11.8695	18	49	24	2	0.428571	0.960784	0.9	0.671233	0.72043	5.18771e-06	0
LBR	9.67709	9.69448	10.0408	10.1995	0.517292	0.358578	0.505019	0.346304	1.42745e-05	0.00197485	0.743231	0.00103667	0.0116887	0.721405	6.30778e-05	0.378067	0.772331	7.00832e-05	0.00633951	0.746693	0.00197171	0.0223449	0.725694	0.000180019	0.581574	0.774691	0.00481728	0.144918	0.734921	0.0213762	0.162976	0.711111	0.00474682	0.36884	0.766667	>	10.2971	18	49	24	2	0.428571	0.960784	0.9	0.671233	0.72043	5.18771e-06	0
DDX46	7.8936	7.88731	8.16818	8.09402	0.202268	0.276431	0.206713	0.280876	0.000102734	0.00541714	0.737628	0.000182302	0.00355205	0.778595	0.0139419	0.447072	0.683007	0.000182073	0.0104773	0.734788	0.000161543	0.00423252	0.78125	0.0123522	0.584174	0.67284	0.0115517	0.189478	0.744444	0.0110421	0.121336	0.772222	0.092456	0.539813	0.707407	>	8.07217	27	42	15	9	0.642857	0.823529	0.75	0.736842	0.741935	5.32681e-06	0
MAP2K3	7.70718	7.66587	7.19759	7.48091	-0.21412	-0.497437	-0.184961	-0.468279	2.90096e-06	0.000966553	0.750233	2.65738e-07	4.14609e-05	0.840686	0.0310753	0.493634	0.62963	1.05464e-05	0.00268835	0.75463	9.5683e-07	0.000138609	0.844907	0.0307952	0.642359	0.634259	0.00238472	0.115019	0.739683	0.000219962	0.0284391	0.830556	0.136606	0.589717	0.618519	<	7.58946	36	31	6	20	0.857143	0.607843	0.642857	0.837838	0.72043	5.32696e-06	0
FAM83G	6.87038	6.63844	6.36766	6.61422	-0.187938	-0.434504	-0.0242203	-0.270786	0.000628046	0.0152555	0.695145	0.000378024	0.00587643	0.759804	0.153055	0.66107	0.608932	8.11613e-05	0.00682275	0.744048	6.98772e-05	0.00239853	0.804398	0.0525284	0.688739	0.66358	0.158853	0.498399	0.577778	0.0527079	0.251596	0.652778	0.865802	0.964787	0.522222	<	7.01839	42	18	0	33	1	0.352941	0.56	1	0.645161	5.66302e-06	0
LMNB1	7.27181	7.34907	8.09398	7.71602	0.42149	0.799444	0.366956	0.74491	7.16619e-07	0.000550997	0.776844	4.62825e-07	5.93012e-05	0.816176	0.00509889	0.410689	0.724401	2.68439e-06	0.00149789	0.794312	1.59387e-06	0.000186334	0.827546	0.00433696	0.581574	0.75	0.0018333	0.110723	0.734921	0.0007509	0.0429987	0.788889	0.049446	0.488411	0.662963	>	6.95002	42	18	0	33	1	0.352941	0.56	1	0.645161	5.66302e-06	0
ERCC8	4.87233	4.77232	5.07046	5.08112	0.238206	0.227541	0.308798	0.298133	0.00138913	0.0245103	0.718487	0.0107523	0.0579849	0.712418	0.0136079	0.447072	0.72658	0.00994784	0.100337	0.701058	0.0380348	0.150714	0.69213	0.0402589	0.668537	0.712963	0.00222129	0.114743	0.760317	0.00922977	0.110885	0.761111	0.00700265	0.374986	0.759259	>	4.6017	42	18	0	33	1	0.352941	0.56	1	0.645161	5.66302e-06	0
DNMT1	9.00279	8.95041	9.51417	9.21694	0.229557	0.526793	0.266531	0.563766	4.61899e-06	0.00113165	0.777544	5.96681e-07	7.05814e-05	0.836193	0.0325422	0.495355	0.699346	2.3009e-05	0.00342717	0.785384	1.58501e-06	0.000186334	0.845486	0.0401885	0.668537	0.705247	0.00097898	0.0909924	0.75873	0.000221308	0.0284391	0.813889	0.0743822	0.520309	0.685185	>	9.2964	25	44	17	7	0.595238	0.862745	0.78125	0.721311	0.741935	6.54059e-06	0
CDCA7	6.11495	6.22016	6.72508	6.50082	0.354925	0.579184	0.280657	0.504915	3.51116e-05	0.00299151	0.739029	4.49673e-05	0.00137453	0.754085	0.00835356	0.427026	0.718954	9.37077e-05	0.00721867	0.753307	0.000118583	0.00342077	0.763889	0.00813887	0.581574	0.739198	0.0179318	0.225248	0.704762	0.011796	0.125315	0.730556	0.0896104	0.535486	0.67037	>	6.60971	25	44	17	7	0.595238	0.862745	0.78125	0.721311	0.741935	6.54059e-06	0
PFDN4	7.45686	7.44232	7.8306	7.69839	0.245807	0.378016	0.256076	0.388285	0.000249829	0.00908633	0.722689	0.00017311	0.00344263	0.772059	0.0297848	0.490095	0.656863	0.00103223	0.0273399	0.721561	0.000539782	0.00933459	0.770833	0.0463833	0.677709	0.655864	0.0114714	0.188953	0.725397	0.00491617	0.0847234	0.775	0.0993879	0.547174	0.659259	>	7.79825	25	44	17	7	0.595238	0.862745	0.78125	0.721311	0.741935	6.54059e-06	0
S100A8	9.67821	8.97381	7.69778	8.53288	-0.938152	-1.77325	-0.440928	-1.27603	8.12256e-06	0.00143292	0.760504	2.03893e-06	0.000172713	0.808007	0.0152023	0.447072	0.697168	4.99548e-06	0.00201048	0.800926	1.45548e-06	0.000177418	0.837963	0.0059502	0.581574	0.751543	0.0422137	0.299618	0.663492	0.00838539	0.105753	0.736111	0.360844	0.755094	0.566667	<	8.21814	25	44	17	7	0.595238	0.862745	0.78125	0.721311	0.741935	6.54059e-06	0
FLJ32255	5.67982	5.4887	4.74655	4.83135	-0.792261	-0.87706	-0.657353	-0.742152	2.66871e-05	0.00257731	0.747899	0.000206593	0.00387794	0.754902	0.00312632	0.387853	0.738562	3.87152e-05	0.00439747	0.757937	0.000208014	0.00491538	0.762731	0.00286821	0.581574	0.751543	0.0105821	0.183529	0.72381	0.0130255	0.130449	0.736111	0.052423	0.491552	0.707407	<	4.98049	29	40	13	11	0.690476	0.784314	0.725	0.754717	0.741935	6.65567e-06	0
CLK2	8.5279	8.48821	8.80862	8.68642	0.170191	0.292387	0.198214	0.320409	0.00100604	0.0201925	0.708217	0.000377583	0.00587413	0.76634	0.0510115	0.538138	0.630719	0.00570508	0.0737032	0.702381	0.00213006	0.0234871	0.759259	0.0995317	0.734793	0.626543	0.0209101	0.236299	0.722222	0.00889569	0.108833	0.783333	0.115258	0.565523	0.640741	>	8.6531	29	40	13	11	0.690476	0.784314	0.725	0.754717	0.741935	6.65567e-06	0
TPSB2	8.55168	8.88718	7.55551	7.90351	-0.746852	-1.09485	-0.983673	-1.33167	2.91701e-05	0.00273342	0.729225	8.19904e-05	0.002096	0.747549	0.00785861	0.425064	0.704793	0.000535276	0.018921	0.706349	0.00078992	0.0123081	0.724537	0.026551	0.63554	0.682099	0.000284359	0.0692688	0.784127	0.000502371	0.0375671	0.802778	0.00448679	0.36884	0.759259	<	8.5843	38	27	4	24	0.904762	0.529412	0.612903	0.870968	0.698925	7.40453e-06	0
DPP4	5.20979	5.43863	4.47745	4.97948	-0.297619	-0.799649	-0.459154	-0.961184	0.000684289	0.0159348	0.721755	0.000122286	0.00274985	0.79085	0.212585	0.717534	0.62963	0.00614856	0.0764878	0.688492	0.00109426	0.0152655	0.755787	0.375688	0.878888	0.598765	0.000396807	0.0784806	0.801587	1.13291e-05	0.0126627	0.875	0.0748682	0.520918	0.703704	<	5.27049	38	27	4	24	0.904762	0.529412	0.612903	0.870968	0.698925	7.40453e-06	0
CA13	5.78868	5.4562	5.22996	5.30596	-0.384932	-0.46093	-0.150236	-0.226234	0.000601349	0.0148049	0.711018	0.00330199	0.0258356	0.720588	0.0196919	0.467856	0.698257	6.50514e-05	0.00614986	0.752646	0.00060482	0.0101434	0.761574	0.00351224	0.581574	0.740741	0.239821	0.588109	0.611111	0.255434	0.534486	0.622222	0.427588	0.789355	0.596296	<	5.69927	38	27	4	24	0.904762	0.529412	0.612903	0.870968	0.698925	7.40453e-06	0
CCT3	10.626	10.5178	10.972	10.882	0.287809	0.377831	0.364173	0.454195	1.86329e-05	0.00215249	0.757236	7.67552e-05	0.00201366	0.785131	0.00618372	0.410689	0.720044	0.000152728	0.00975725	0.748677	0.000267932	0.00586663	0.775463	0.013059	0.584174	0.712963	0.00040682	0.0784806	0.777778	0.000778544	0.0439657	0.808333	0.0124723	0.398511	0.737037	>	10.599	38	27	4	24	0.904762	0.529412	0.612903	0.870968	0.698925	7.40453e-06	0
UHRF1	8.79156	8.76441	9.48203	9.18022	0.396648	0.698455	0.415812	0.717618	1.94334e-05	0.00220912	0.746965	4.12639e-05	0.0012829	0.776144	0.0158481	0.447072	0.708061	3.15889e-05	0.00397166	0.762566	5.08556e-05	0.00195963	0.790509	0.0100888	0.581574	0.725309	0.00282759	0.122488	0.709524	0.00383938	0.0756569	0.741667	0.054589	0.493349	0.666667	>	8.83852	38	27	4	24	0.904762	0.529412	0.612903	0.870968	0.698925	7.40453e-06	0
EFTUD1	7.49952	7.53789	7.93139	7.83284	0.322034	0.420581	0.294949	0.393496	3.15655e-05	0.00285532	0.746032	0.000140725	0.00300645	0.767974	0.00831582	0.427026	0.716776	0.000114547	0.00809238	0.749339	0.000375505	0.00731649	0.774306	0.0125096	0.584174	0.716049	0.00256664	0.118498	0.738095	0.00232401	0.0624453	0.752778	0.0319571	0.456912	0.718519	>	7.46054	38	27	4	24	0.904762	0.529412	0.612903	0.870968	0.698925	7.40453e-06	0
E2F6	7.74773	7.71422	8.09049	8.05523	0.317352	0.352609	0.341007	0.376264	9.94765e-05	0.00528892	0.730159	0.000574538	0.00786145	0.730392	0.00316455	0.387853	0.729847	0.000466531	0.0172392	0.734127	0.0015083	0.0186976	0.734954	0.00540825	0.581574	0.733025	0.00713163	0.165251	0.720635	0.0132402	0.131292	0.719444	0.0247156	0.435311	0.722222	>	7.69304	38	27	4	24	0.904762	0.529412	0.612903	0.870968	0.698925	7.40453e-06	0
HNRNPF	9.02632	8.87526	9.21947	9.26042	0.278533	0.237582	0.385158	0.344207	0.00164367	0.0271111	0.709617	0.0131332	0.0656727	0.709967	0.0159977	0.447072	0.70915	0.0205657	0.14699	0.662037	0.0698045	0.22242	0.663194	0.0704199	0.703845	0.660494	0.000212877	0.0632569	0.82381	0.00030684	0.0319264	0.822222	0.0023082	0.334371	0.825926	>	8.86958	38	27	4	24	0.904762	0.529412	0.612903	0.870968	0.698925	7.40453e-06	0
SART3	6.47346	6.46507	6.73234	6.62407	0.153073	0.261349	0.158992	0.267268	0.000201464	0.00794783	0.731092	0.000220138	0.00405602	0.754902	0.0359864	0.505555	0.699346	0.000932736	0.0261153	0.723545	0.000859882	0.0129764	0.75	0.056135	0.692287	0.688272	0.00640506	0.158731	0.749206	0.00416937	0.0785722	0.766667	0.0683122	0.510309	0.725926	>	6.61598	30	39	12	12	0.714286	0.764706	0.714286	0.764706	0.741935	7.41248e-06	0
PSMA4	10.4782	10.3732	10.6774	10.665	0.217655	0.230098	0.291748	0.304192	0.0015189	0.0258767	0.712418	0.00538848	0.0362453	0.723039	0.0198495	0.468168	0.698257	0.0154287	0.126603	0.686508	0.0309617	0.132567	0.695602	0.0733607	0.707475	0.674383	0.0024978	0.116667	0.774603	0.00322373	0.0705724	0.788889	0.010543	0.393563	0.755556	>	10.5675	30	39	12	12	0.714286	0.764706	0.714286	0.764706	0.741935	7.41248e-06	0
SPINK5	7.99463	7.40747	6.1299	7.20734	-0.614591	-1.69203	-0.200127	-1.27756	1.81626e-05	0.00213581	0.747899	1.41285e-06	0.000131955	0.833333	0.101508	0.605624	0.633987	3.34049e-06	0.00158999	0.791667	2.10955e-07	5.20642e-05	0.880787	0.0350087	0.651225	0.67284	0.0335085	0.274457	0.642857	0.00269447	0.0652638	0.719444	0.66173	0.897271	0.540741	<	7.45643	35	32	7	19	0.833333	0.627451	0.648148	0.820513	0.72043	7.44809e-06	0
CPEB4	5.81618	5.81451	5.42997	5.45658	-0.359112	-0.385714	-0.357934	-0.384536	8.58405e-05	0.00487511	0.725023	0.00076814	0.00956753	0.726307	0.0032384	0.387853	0.723312	0.000243773	0.0121528	0.721561	0.00133774	0.0173551	0.725694	0.00404628	0.581574	0.716049	0.00796594	0.170088	0.733333	0.017324	0.149012	0.727778	0.0276716	0.444497	0.740741	<	5.79731	35	32	7	19	0.833333	0.627451	0.648148	0.820513	0.72043	7.44809e-06	0
LECT1	3.32734	3.30524	3.91412	3.44474	0.123892	0.593279	0.139491	0.608879	1.73074e-05	0.00212525	0.772176	2.51781e-07	4.10119e-05	0.79902	0.040047	0.511726	0.736383	0.000280796	0.0131874	0.767196	1.08431e-05	0.000675279	0.795139	0.0755611	0.709743	0.729938	0.0078875	0.170088	0.784127	0.00133729	0.0521125	0.808333	0.0282795	0.445409	0.751852	>	3.34681	35	32	7	19	0.833333	0.627451	0.648148	0.820513	0.72043	7.44809e-06	0
PARP1	9.31971	9.35265	9.75084	9.56763	0.238228	0.421445	0.214973	0.39819	9.49429e-06	0.00154309	0.760971	3.50478e-06	0.000244126	0.805556	0.0144367	0.447072	0.701525	2.24722e-05	0.00342717	0.773148	5.31948e-06	0.000423673	0.818287	0.0130205	0.584174	0.712963	0.00638475	0.158731	0.731746	0.00202923	0.0598888	0.775	0.116978	0.56762	0.674074	>	9.43084	35	32	7	19	0.833333	0.627451	0.648148	0.820513	0.72043	7.44809e-06	0
CNOT6	7.73695	7.71928	8.02759	7.99182	0.260071	0.295843	0.272546	0.308317	0.000596753	0.0147745	0.711951	0.00142431	0.0146544	0.718954	0.0123575	0.443161	0.702614	0.00182004	0.0379004	0.722884	0.0026504	0.0271574	0.726852	0.0179206	0.618488	0.717593	0.0234422	0.24664	0.685714	0.0261183	0.179775	0.7	0.0771552	0.522087	0.666667	>	7.69686	35	32	7	19	0.833333	0.627451	0.648148	0.820513	0.72043	7.44809e-06	0
HTR1F	3.57499	3.69992	3.43013	3.44898	-0.162752	-0.181606	-0.250935	-0.269789	1.7772e-05	0.00212525	0.753035	0.000145825	0.00307834	0.764706	0.00261795	0.387853	0.737473	0.000653793	0.0213213	0.724206	0.00139984	0.017847	0.738426	0.0137316	0.587968	0.705247	3.99486e-05	0.037114	0.822222	0.000194234	0.0272358	0.827778	0.00199854	0.320411	0.814815	<	3.4216	22	46	20	5	0.52381	0.901961	0.814815	0.69697	0.731183	7.94431e-06	0
ADAM9	7.5852	7.43558	6.98787	7.38999	-0.151204	-0.553327	-0.0455933	-0.447716	0.000597917	0.0147745	0.711485	3.66442e-05	0.00117964	0.821078	0.262892	0.750384	0.565359	0.00076172	0.0235356	0.731481	7.60398e-05	0.0025251	0.84375	0.191238	0.792816	0.58179	0.0689583	0.361065	0.663492	0.00655704	0.0947807	0.766667	0.756774	0.931915	0.525926	<	7.10835	22	46	20	5	0.52381	0.901961	0.814815	0.69697	0.731183	7.94431e-06	0
LOC727930	3.75065	3.77379	3.6528	3.65347	-0.103987	-0.104657	-0.120322	-0.120992	0.0039405	0.0448092	0.680205	0.00995079	0.0549217	0.685458	0.0298508	0.490095	0.673203	0.0143564	0.121558	0.676587	0.0240536	0.112893	0.685185	0.0587507	0.695432	0.665123	0.0332059	0.274457	0.688889	0.0407257	0.220922	0.686111	0.0880554	0.535415	0.692593	<	3.61564	22	46	20	5	0.52381	0.901961	0.814815	0.69697	0.731183	7.94431e-06	0
TP53INP2	7.79122	7.30075	7.03172	7.43971	-0.207251	-0.615241	0.138961	-0.269028	0.00402822	0.0454962	0.668067	0.000471546	0.00687076	0.735294	0.287169	0.763646	0.578431	0.000810975	0.0243426	0.709656	0.000120226	0.00345818	0.770833	0.102767	0.734793	0.628086	0.654713	0.860907	0.568254	0.188541	0.462363	0.65	0.547848	0.848337	0.540741	<	6.99584	22	46	20	5	0.52381	0.901961	0.814815	0.69697	0.731183	7.94431e-06	0
RPS9	8.83612	8.9099	8.9995	8.96243	0.104611	0.141676	0.0525375	0.0896019	9.80514e-05	0.00528383	0.747899	0.00029063	0.00490709	0.772876	0.0144216	0.447072	0.714597	7.70595e-05	0.00664328	0.784392	0.000275405	0.00593278	0.813657	0.00963572	0.581574	0.74537	0.0744424	0.371464	0.660317	0.0480446	0.239755	0.675	0.263932	0.697455	0.640741	>	8.98507	22	46	20	5	0.52381	0.901961	0.814815	0.69697	0.731183	7.94431e-06	0
GLTSCR2	8.86731	8.93398	9.14932	8.95726	0.0703344	0.262403	0.0232717	0.21534	0.00101436	0.0202579	0.683473	3.49639e-05	0.00115288	0.790033	0.279088	0.758272	0.541394	0.00146264	0.0337567	0.69709	8.38094e-05	0.00268931	0.800926	0.21443	0.812698	0.558642	0.10525	0.427079	0.650794	0.0125018	0.128039	0.763889	0.782568	0.941101	0.5	>	9.10738	22	46	20	5	0.52381	0.901961	0.814815	0.69697	0.731183	7.94431e-06	0
SENP1	6.24471	6.07183	6.75694	6.41488	0.221018	0.563081	0.34305	0.685112	1.7633e-05	0.00212525	0.755369	2.28518e-06	0.000184951	0.825163	0.0629735	0.557728	0.662309	0.000403999	0.0160134	0.726852	3.84907e-05	0.00158653	0.799769	0.159458	0.778843	0.62963	0.000129808	0.0564301	0.82381	2.82219e-05	0.0143733	0.886111	0.0193667	0.416279	0.740741	>	6.37801	33	35	9	16	0.785714	0.686275	0.673469	0.795455	0.731183	8.25844e-06	0
ILF2	10.3156	10.344	10.8923	10.6251	0.301154	0.568358	0.281151	0.548355	4.60713e-07	0.000453211	0.781979	2.49888e-07	4.10119e-05	0.829248	0.00511713	0.410689	0.718954	2.77235e-06	0.00149789	0.791005	1.29282e-06	0.00016674	0.837963	0.00601729	0.581574	0.728395	0.00083012	0.0882709	0.760317	0.000283462	0.0304661	0.808333	0.0358778	0.467187	0.696296	>	10.2993	39	25	3	26	0.928571	0.490196	0.6	0.892857	0.688172	9.15898e-06	0
NUCKS1	9.01106	8.90864	9.48332	9.31569	0.334757	0.502386	0.407054	0.574683	1.98456e-05	0.00222212	0.749767	1.5009e-05	0.000656554	0.79902	0.00970202	0.427184	0.684096	0.000338677	0.0144654	0.734127	0.000174323	0.0044337	0.783565	0.03028	0.642359	0.66821	0.000712524	0.084786	0.787302	0.000229322	0.0286299	0.836111	0.0187871	0.413876	0.722222	>	8.92948	39	25	3	26	0.928571	0.490196	0.6	0.892857	0.688172	9.15898e-06	0
PSMD4	8.85457	8.74333	8.97669	9.04515	0.223295	0.154833	0.301818	0.233355	0.00055996	0.0143331	0.715219	0.0109204	0.0585596	0.696078	0.00323651	0.387853	0.740741	0.0102428	0.101774	0.668651	0.0643513	0.211308	0.638889	0.022054	0.620524	0.708333	0.000226954	0.0632569	0.826984	0.000649099	0.0405505	0.833333	0.00140159	0.316797	0.818519	>	8.77285	39	25	3	26	0.928571	0.490196	0.6	0.892857	0.688172	9.15898e-06	0
S100A9	12.2956	11.5653	9.75515	10.7784	-1.30244	-2.32564	-0.78694	-1.81015	4.46773e-07	0.000453211	0.780579	1.81372e-07	3.69981e-05	0.834967	0.00615591	0.410689	0.708061	3.30565e-07	0.000472024	0.806217	1.3149e-07	4.10722e-05	0.855324	0.0026809	0.581574	0.740741	0.00675503	0.163076	0.719048	0.000912677	0.0456797	0.786111	0.172972	0.624193	0.62963	<	11.1959	32	36	10	15	0.761905	0.705882	0.680851	0.782609	0.731183	9.18215e-06	0
SGSH	7.02327	7.03288	6.43933	6.84653	-0.179565	-0.586764	-0.186347	-0.593546	3.75938e-05	0.00314451	0.75957	4.70652e-07	5.93012e-05	0.835784	0.11536	0.620279	0.657952	0.00030445	0.0136173	0.763889	7.03284e-06	0.000508575	0.83912	0.159579	0.778843	0.66358	0.00579913	0.153692	0.749206	0.000266936	0.0296462	0.827778	0.207508	0.650759	0.644444	<	6.93354	32	36	10	15	0.761905	0.705882	0.680851	0.782609	0.731183	9.18215e-06	0
HSF2	6.02512	5.86939	6.82357	6.16712	0.187807	0.844251	0.297734	0.954178	1.26341e-05	0.00180406	0.755836	6.75104e-08	1.98471e-05	0.843954	0.16585	0.675122	0.638344	0.000361477	0.0151178	0.73082	4.19373e-06	0.000352256	0.820602	0.332735	0.863807	0.611111	0.000541515	0.0797171	0.815873	1.70802e-05	0.0130718	0.9	0.0509648	0.489472	0.703704	>	6.18294	32	36	10	15	0.761905	0.705882	0.680851	0.782609	0.731183	9.18215e-06	0
ZNF124	4.9427	4.83659	5.50238	5.16641	0.254919	0.590881	0.329821	0.665783	1.57665e-05	0.00209692	0.754902	1.21886e-06	0.000120019	0.827614	0.0398411	0.511097	0.657952	0.000365685	0.0152164	0.723545	3.53118e-05	0.00149876	0.796296	0.103142	0.734793	0.626543	0.000582694	0.0803354	0.830159	4.88103e-05	0.0153255	0.902778	0.032581	0.457208	0.733333	>	5.06249	32	36	10	15	0.761905	0.705882	0.680851	0.782609	0.731183	9.18215e-06	0
MRPS9	7.88335	7.84422	8.25095	8.14785	0.27601	0.379104	0.303633	0.406727	0.000360411	0.0111532	0.721289	0.00102388	0.0115772	0.729575	0.017167	0.453462	0.71024	0.00151049	0.034429	0.722884	0.00296445	0.0289921	0.731481	0.0274728	0.636395	0.71142	0.00851964	0.171676	0.71746	0.0125555	0.128256	0.725	0.0383489	0.473537	0.707407	>	7.96431	32	36	10	15	0.761905	0.705882	0.680851	0.782609	0.731183	9.18215e-06	0
POU2F1	5.26882	5.27473	5.50576	5.36018	0.0896203	0.235206	0.0854446	0.23103	1.85134e-05	0.00215175	0.752101	1.60031e-06	0.000144759	0.821078	0.0501019	0.536863	0.660131	9.08696e-05	0.00714294	0.760582	9.05257e-06	0.000599699	0.827546	0.0559779	0.692287	0.671296	0.00711283	0.165251	0.731746	0.00153676	0.0555053	0.805556	0.170702	0.623137	0.633333	>	5.26899	37	29	5	22	0.880952	0.568627	0.627119	0.852941	0.709677	9.37893e-06	0
ARHGAP1	6.50571	6.51672	6.30792	6.36574	-0.143208	-0.201036	-0.150979	-0.208808	2.64631e-05	0.00257731	0.752101	9.61348e-05	0.00236851	0.761438	0.00393529	0.399534	0.739651	0.00022627	0.0116394	0.749339	0.000550235	0.00945809	0.759259	0.00913016	0.581574	0.736111	0.00333566	0.128939	0.75873	0.00512657	0.0857617	0.766667	0.0170976	0.410289	0.748148	<	6.52528	37	29	5	22	0.880952	0.568627	0.627119	0.852941	0.709677	9.37893e-06	0
DHX9	7.27649	7.21009	7.99056	7.46352	0.206555	0.733601	0.253426	0.780473	8.17131e-06	0.00143292	0.737628	3.29253e-08	1.2419e-05	0.836601	0.103394	0.607032	0.605664	0.000137191	0.00908143	0.726852	1.11446e-06	0.000149525	0.826389	0.175428	0.784101	0.594136	0.00146661	0.102514	0.763492	3.25163e-05	0.0143733	0.861111	0.12401	0.575833	0.633333	>	8.14385	13	51	29	0	0.309524	1	1	0.6375	0.688172	9.83149e-06	0
PAR5	2.47983	2.45258	2.69594	2.62596	0.154148	0.224132	0.173383	0.243367	0.000169382	0.00711369	0.725023	0.000566632	0.0077906	0.705065	0.000349719	0.378067	0.751634	0.00161697	0.0358767	0.716931	0.00360325	0.0330273	0.694444	0.00124799	0.581574	0.746914	0.016147	0.217806	0.744444	0.0290854	0.187806	0.730556	0.00611048	0.372852	0.762963	>	2.69688	13	51	29	0	0.309524	1	1	0.6375	0.688172	9.83149e-06	0
CCDC160	2.41912	2.47597	2.67281	2.51485	0.0790086	0.236964	0.0388811	0.196836	0.000733216	0.0165811	0.72479	0.000151609	0.00313906	0.76348	0.0329545	0.496529	0.673203	0.00152862	0.0346469	0.757606	0.000519334	0.00909904	0.792245	0.0195209	0.620524	0.71142	0.135437	0.468779	0.646032	0.0648799	0.276308	0.694444	0.467033	0.810444	0.581481	>	2.62817	13	51	29	0	0.309524	1	1	0.6375	0.688172	9.83149e-06	0
DTNB	4.97799	4.99549	5.13949	5.06011	0.0769719	0.15635	0.064613	0.143991	0.00230763	0.0330783	0.673669	0.000643134	0.0084569	0.70915	0.113149	0.617345	0.626362	0.00579254	0.0742679	0.672619	0.00195363	0.0222178	0.708333	0.135032	0.760614	0.625	0.0773679	0.377511	0.67619	0.0289488	0.18759	0.711111	0.338254	0.742022	0.62963	>	5.23288	13	51	29	0	0.309524	1	1	0.6375	0.688172	9.83149e-06	0
KCNB2	3.49565	3.48179	3.74719	3.61316	0.12159	0.255615	0.131375	0.2654	0.0013163	0.0235369	0.611111	6.34268e-05	0.00173932	0.661765	0.0648526	0.561925	0.543573	0.00717518	0.0837397	0.605159	0.000683335	0.0110458	0.658565	0.123719	0.74579	0.533951	0.0562632	0.334712	0.625397	0.0156042	0.142364	0.669444	0.246969	0.685062	0.566667	>	3.79578	13	51	29	0	0.309524	1	1	0.6375	0.688172	9.83149e-06	0
CCDC8	5.19027	5.21134	6.07401	5.41028	0.21382	0.877548	0.198941	0.86267	0.0062176	0.0588176	0.591503	9.64281e-05	0.00237109	0.708333	0.394008	0.820919	0.56427	0.0165608	0.131449	0.596561	0.000507515	0.00896267	0.709491	0.438348	0.899575	0.554012	0.111778	0.436764	0.579365	0.0136622	0.133021	0.705556	0.615749	0.876206	0.588889	>	6.56766	13	51	29	0	0.309524	1	1	0.6375	0.688172	9.83149e-06	0
ZNF300	5.48226	5.65821	5.98142	5.59748	0.0634763	0.44741	-0.0607276	0.323206	0.204667	0.442899	0.571662	0.0814252	0.220148	0.61683	0.807245	0.956545	0.511438	0.185822	0.46963	0.578704	0.0813803	0.245863	0.622685	0.684748	0.956715	0.520062	0.653905	0.860511	0.554762	0.398379	0.663279	0.602778	0.866465	0.965013	0.509259	>	6.82491	13	51	29	0	0.309524	1	1	0.6375	0.688172	9.83149e-06	0
P2RY2	6.08279	5.71831	4.8271	5.53663	-0.438958	-1.14848	-0.18168	-0.891206	1.70371e-05	0.00212525	0.7493	7.81552e-07	8.7285e-05	0.85866	0.0922514	0.595216	0.603486	7.63731e-06	0.00245534	0.782407	2.94744e-07	6.4046e-05	0.888889	0.0452726	0.677709	0.640432	0.0238999	0.247813	0.669841	0.000811866	0.0442585	0.786111	0.567778	0.858088	0.514815	<	4.68384	13	51	29	0	0.309524	1	1	0.6375	0.688172	9.83149e-06	0
UPP1	7.84367	7.7142	6.4552	7.54671	-0.25888	-1.3504	-0.167486	-1.259	7.41612e-06	0.00134778	0.745565	5.65847e-09	3.77062e-06	0.870098	0.208984	0.71513	0.579521	3.54392e-05	0.00426786	0.755291	7.07254e-08	2.66768e-05	0.873843	0.178927	0.786727	0.597222	0.00860569	0.1725	0.722222	0.000109954	0.0248436	0.861111	0.515205	0.834465	0.537037	<	6.1575	13	51	29	0	0.309524	1	1	0.6375	0.688172	9.83149e-06	0
COPZ2	6.44376	6.23604	5.63547	6.13588	-0.246786	-0.74719	-0.100159	-0.600563	1.21991e-05	0.00176719	0.740896	1.18714e-07	2.8593e-05	0.832516	0.0701584	0.569509	0.618736	1.39867e-05	0.00273054	0.768519	1.89925e-07	4.93089e-05	0.856481	0.0332804	0.651192	0.651235	0.0396295	0.293788	0.674603	0.00272479	0.0653158	0.775	0.591815	0.86603	0.540741	<	5.41722	13	51	29	0	0.309524	1	1	0.6375	0.688172	9.83149e-06	0
CALML3	7.64898	7.34838	6.30655	7.16114	-0.399433	-1.25402	-0.187244	-1.04183	3.0662e-06	0.000967176	0.737628	1.71357e-08	7.38946e-06	0.818627	0.0232135	0.472935	0.62963	8.98355e-06	0.00255984	0.769841	1.3495e-07	4.12443e-05	0.84375	0.0115479	0.583792	0.671296	0.0294273	0.26491	0.660317	0.00251384	0.0636323	0.758333	0.452719	0.802973	0.52963	<	6.39164	13	51	29	0	0.309524	1	1	0.6375	0.688172	9.83149e-06	0
TOM1L2	6.11708	5.94591	5.71752	5.94763	-0.119108	-0.349218	0.00171767	-0.228393	2.19006e-05	0.0023475	0.730159	9.46685e-07	0.000101748	0.82598	0.100619	0.603891	0.602397	3.48859e-06	0.00160566	0.781746	1.93478e-07	4.95873e-05	0.861111	0.0241655	0.628209	0.675926	0.111578	0.43672	0.606349	0.0100735	0.116674	0.741667	0.984302	0.994651	0.574074	<	5.63672	13	51	29	0	0.309524	1	1	0.6375	0.688172	9.83149e-06	0
KRT6B	11.6504	10.6325	8.5188	11.1043	-0.246734	-2.83226	0.471791	-2.11373	1.34707e-05	0.00189643	0.723156	4.54529e-10	6.49036e-07	0.85866	0.494632	0.867832	0.542484	5.75817e-06	0.0020195	0.771825	3.68652e-10	8.18857e-07	0.893519	0.122489	0.744611	0.609568	0.118079	0.444627	0.606349	0.00178484	0.0579232	0.775	0.36185	0.755482	0.618519	<	8.37158	13	51	29	0	0.309524	1	1	0.6375	0.688172	9.83149e-06	0
EGFLAM	6.19927	6.47587	6.07907	5.93179	-0.348837	-0.201556	-0.544086	-0.396805	0.0583054	0.216651	0.692344	0.244929	0.445071	0.699346	0.0270942	0.487087	0.683007	0.223185	0.514936	0.662037	0.514822	0.721271	0.668981	0.0821675	0.715423	0.652778	0.038668	0.290606	0.765079	0.141064	0.404699	0.772222	0.0103618	0.393563	0.755556	<	5.56826	13	51	29	0	0.309524	1	1	0.6375	0.688172	9.83149e-06	0
KRT6A	13.3091	12.6359	9.54591	13.0463	-0.0647922	-3.56522	0.410387	-3.09004	9.15417e-06	0.00152498	0.681606	2.75747e-11	1.39558e-07	0.862745	0.802856	0.955824	0.559913	2.73246e-05	0.0037073	0.71627	8.08621e-10	1.3471e-06	0.888889	0.27447	0.832995	0.513889	0.052409	0.324596	0.598413	0.00060184	0.0390629	0.8	0.361034	0.755173	0.67037	<	9.50738	13	51	29	0	0.309524	1	1	0.6375	0.688172	9.83149e-06	0
SERPINB7	5.82081	4.7444	4.54102	5.68599	0.181771	-0.963198	0.941589	-0.203379	0.229335	0.472157	0.646125	0.0318531	0.119354	0.75	0.726382	0.934675	0.507625	0.0808725	0.307091	0.677249	0.0121884	0.0738584	0.773148	0.817908	0.979736	0.549383	0.582079	0.824571	0.571429	0.669824	0.847711	0.694444	0.110077	0.559726	0.592593	<	3.68739	13	51	29	0	0.309524	1	1	0.6375	0.688172	9.83149e-06	0
SRRM3	5.22431	5.163	4.98636	5.13833	-0.0679464	-0.219919	-0.0246743	-0.176647	0.0044276	0.0486179	0.638655	0.00102779	0.0116148	0.731209	0.259093	0.747443	0.515251	0.00556098	0.0728981	0.652778	0.00182146	0.021158	0.741898	0.195876	0.797506	0.533951	0.170597	0.511536	0.604762	0.064789	0.276308	0.705556	0.72461	0.92138	0.52963	<	4.88714	13	51	29	0	0.309524	1	1	0.6375	0.688172	9.83149e-06	0
STIM1	6.56783	6.28703	6.13416	6.47351	-0.0117256	-0.351078	0.186484	-0.152868	0.0154209	0.0995413	0.638189	0.000286008	0.00486604	0.739379	0.902534	0.979938	0.503268	0.00309129	0.0521501	0.685185	7.66758e-05	0.0025336	0.773148	0.366532	0.875603	0.567901	0.954301	0.984309	0.525397	0.245357	0.525153	0.658333	0.133819	0.585892	0.651852	<	5.94749	13	51	29	0	0.309524	1	1	0.6375	0.688172	9.83149e-06	0
APLNR	5.89896	5.78563	5.49314	5.82393	-0.0417062	-0.372494	0.0382942	-0.292494	0.0660645	0.233503	0.617647	0.00699515	0.043094	0.686275	0.79148	0.953414	0.526144	0.0624528	0.267572	0.62963	0.00757426	0.0541685	0.697917	0.664693	0.952689	0.53858	0.438254	0.742106	0.588889	0.126205	0.382844	0.658333	0.863408	0.964095	0.503704	<	5.14465	13	51	29	0	0.309524	1	1	0.6375	0.688172	9.83149e-06	0
TNNT2	5.26171	5.25949	5.09781	5.11579	-0.145264	-0.163247	-0.143694	-0.161677	9.97306e-06	0.00160783	0.759104	0.000158573	0.00322874	0.76634	0.000960639	0.378067	0.749455	7.60775e-05	0.00661246	0.748016	0.000670247	0.0109215	0.758102	0.00245353	0.581574	0.734568	0.00231552	0.115019	0.785714	0.0069289	0.0969988	0.786111	0.00857055	0.389751	0.785185	<	5.00977	13	51	29	0	0.309524	1	1	0.6375	0.688172	9.83149e-06	0
PLRG1	7.46004	7.4042	7.93173	7.85625	0.412633	0.488114	0.452043	0.527525	3.05679e-06	0.000967176	0.769841	5.45131e-06	0.000333263	0.806373	0.00104647	0.378067	0.721133	5.37812e-05	0.00529625	0.759921	5.20237e-05	0.00198854	0.800926	0.0040632	0.581574	0.705247	0.000917023	0.0898638	0.793651	0.0004319	0.0361419	0.819444	0.0126217	0.398511	0.759259	>	7.51435	34	33	8	18	0.809524	0.647059	0.653846	0.804878	0.72043	1.00725e-05	0
ZNF184	6.61016	6.95122	7.47482	6.99766	0.287187	0.764344	0.0464363	0.523593	3.72975e-06	0.00104453	0.753968	1.94567e-07	3.81332e-05	0.822712	0.0397074	0.511097	0.662309	7.03011e-07	0.000765092	0.810185	4.99654e-08	2.32029e-05	0.873843	0.00642155	0.581574	0.725309	0.0654162	0.353442	0.619048	0.0070425	0.0975653	0.7	0.784407	0.941363	0.511111	>	6.8902	34	33	8	18	0.809524	0.647059	0.653846	0.804878	0.72043	1.00725e-05	0
LPGAT1	6.99886	7.09843	7.55335	7.29845	0.270301	0.525199	0.200016	0.454913	3.41981e-05	0.00298539	0.743697	1.74004e-05	0.000727454	0.791667	0.0212442	0.469558	0.679739	6.52178e-05	0.00614986	0.757275	3.54991e-05	0.00150352	0.802083	0.0157297	0.604936	0.697531	0.0196853	0.232154	0.711111	0.00804288	0.103732	0.766667	0.173687	0.625242	0.637037	>	7.12181	34	33	8	18	0.809524	0.647059	0.653846	0.804878	0.72043	1.00725e-05	0
KIF3A	5.28905	5.35113	5.74482	5.47305	0.165741	0.43751	0.121921	0.393689	0.000438883	0.0124278	0.730159	5.29579e-05	0.00152812	0.781863	0.119463	0.624319	0.66122	0.000829135	0.0246655	0.748677	0.000114089	0.00333444	0.798611	0.101949	0.734793	0.682099	0.0482431	0.315907	0.685714	0.011917	0.125977	0.741667	0.395216	0.774736	0.611111	>	5.34207	34	33	8	18	0.809524	0.647059	0.653846	0.804878	0.72043	1.00725e-05	0
PPIH	5.85474	5.89619	6.2982	6.01354	0.146606	0.431268	0.117352	0.402013	0.00013844	0.00640636	0.728758	2.06166e-05	0.000809717	0.784314	0.0775391	0.582641	0.654684	0.000376551	0.0153854	0.73545	7.32064e-05	0.00245548	0.787037	0.0617234	0.698803	0.666667	0.0278808	0.26214	0.712698	0.00925477	0.11089	0.777778	0.263967	0.697455	0.625926	>	5.88615	34	33	8	18	0.809524	0.647059	0.653846	0.804878	0.72043	1.00725e-05	0
INTS7	5.08034	4.899	5.44733	5.28876	0.261752	0.420326	0.389752	0.548326	1.04592e-05	0.00164638	0.753035	1.15831e-05	0.000546543	0.79902	0.0118935	0.442459	0.691721	0.000492799	0.0178794	0.714947	0.000272081	0.00590003	0.766204	0.0563324	0.692287	0.646605	2.25576e-05	0.037114	0.844444	1.35671e-05	0.0126627	0.877778	0.00297695	0.347555	0.8	>	5.17361	31	37	11	14	0.738095	0.72549	0.688889	0.770833	0.731183	1.01404e-05	0
TSN	8.25907	8.27442	8.76073	8.51763	0.254043	0.497148	0.243214	0.486319	0.000416849	0.0121299	0.722222	0.000257653	0.00453012	0.736111	0.0323589	0.495355	0.703704	0.001003	0.0270983	0.723545	0.000548951	0.00944413	0.738426	0.0252755	0.628517	0.703704	0.0368658	0.2851	0.719048	0.0264791	0.180847	0.730556	0.163671	0.618248	0.703704	>	8.39079	31	37	11	14	0.738095	0.72549	0.688889	0.770833	0.731183	1.01404e-05	0
DLK1	3.63246	3.81234	5.93027	4.41112	0.725748	2.2449	0.598773	2.11792	0.000835616	0.0179044	0.717554	0.00011164	0.00259511	0.704248	0.0396457	0.511097	0.735294	0.00281068	0.0494688	0.714947	0.000576549	0.00975935	0.701389	0.035393	0.651685	0.733025	0.0821551	0.387978	0.72381	0.0372738	0.212049	0.711111	0.298502	0.719981	0.740741	>	3.58203	31	37	11	14	0.738095	0.72549	0.688889	0.770833	0.731183	1.01404e-05	0
CEP192	6.73268	6.56942	7.16253	6.99232	0.307661	0.477867	0.422905	0.593111	0.000221526	0.00846756	0.704015	0.00037271	0.00582552	0.72549	0.0301932	0.491682	0.675381	0.00254303	0.0461741	0.679894	0.00258615	0.026732	0.703704	0.0804467	0.714354	0.648148	0.000682869	0.0837499	0.761905	0.000787609	0.044045	0.777778	0.0139442	0.401502	0.740741	>	6.5396	41	20	1	31	0.97619	0.392157	0.569444	0.952381	0.655914	1.07297e-05	0
CDK2	5.98691	6.07543	6.3562	6.20207	0.189123	0.343251	0.126638	0.280766	0.000589184	0.0146858	0.711018	0.000633624	0.0083733	0.745915	0.0653011	0.562688	0.664488	0.000447358	0.0169057	0.742063	0.000495359	0.00883383	0.775463	0.0390315	0.667686	0.697531	0.0580797	0.339425	0.636508	0.0373144	0.212066	0.675	0.312512	0.728047	0.585185	>	5.94743	40	23	2	28	0.952381	0.45098	0.588235	0.92	0.677419	1.08121e-05	0
TNS1	5.80396	5.90468	5.58643	5.75941	-0.074168	-0.247147	-0.145267	-0.318246	0.0265179	0.137159	0.64099	0.0134448	0.0665779	0.683007	0.47465	0.859767	0.584967	0.083118	0.311338	0.619709	0.0385881	0.152303	0.663194	0.675178	0.956088	0.561728	0.015665	0.215526	0.692063	0.010895	0.121055	0.730556	0.190918	0.638982	0.640741	<	6.03305	40	23	2	28	0.952381	0.45098	0.588235	0.92	0.677419	1.08121e-05	0
ZNF239	4.9969	5.29912	5.99083	5.59458	0.508787	0.905041	0.295458	0.691712	1.469e-06	0.000652597	0.776377	1.84581e-07	3.72722e-05	0.822712	0.00398244	0.399534	0.714597	2.42441e-06	0.00149789	0.80291	3.92173e-07	8.0824e-05	0.850694	0.00235081	0.581574	0.739198	0.0238949	0.247813	0.712698	0.00410395	0.0780327	0.755556	0.217334	0.658479	0.655556	>	5.40598	30	38	12	13	0.714286	0.745098	0.697674	0.76	0.731183	1.10592e-05	0
SHISA5	9.39501	9.28663	8.78656	9.20444	-0.1587	-0.576577	-0.0821976	-0.500074	5.26967e-06	0.00114199	0.777311	9.46851e-09	4.59036e-06	0.883987	0.117932	0.623543	0.635076	1.11341e-05	0.00268835	0.794974	3.07188e-08	1.75457e-05	0.903935	0.0796242	0.713157	0.649691	0.0137966	0.204785	0.734921	0.00019741	0.0272358	0.836111	0.541006	0.845098	0.6	<	8.97853	23	45	19	6	0.547619	0.882353	0.793103	0.703125	0.731183	1.16353e-05	0
HSDL1	6.38896	6.46886	6.98943	6.69374	0.281279	0.57697	0.224881	0.520571	6.00584e-06	0.00120063	0.75817	1.43877e-06	0.000133159	0.805556	0.00889498	0.427184	0.694989	3.9668e-05	0.00446228	0.759259	1.37638e-05	0.000803599	0.803241	0.0126845	0.584174	0.700617	0.00798643	0.170088	0.755556	0.00206077	0.0600131	0.811111	0.0772555	0.522087	0.681481	>	6.78276	23	45	19	6	0.547619	0.882353	0.793103	0.703125	0.731183	1.16353e-05	0
IPO9	5.79447	5.62608	6.1163	5.93347	0.18853	0.371357	0.307393	0.49022	2.10613e-05	0.00231339	0.7493	5.16773e-06	0.000317871	0.812908	0.0283051	0.489099	0.664488	0.000701438	0.0224001	0.721561	8.58285e-05	0.00272349	0.789352	0.10255	0.734793	0.631173	0.0001205	0.0554594	0.815873	4.6035e-05	0.0153255	0.869444	0.0119576	0.397188	0.744444	>	6.06203	23	45	19	6	0.547619	0.882353	0.793103	0.703125	0.731183	1.16353e-05	0
BCL7A	5.99386	5.84765	6.59774	6.21903	0.268171	0.646882	0.371375	0.750086	4.3194e-05	0.00328324	0.746499	5.51757e-06	0.000336286	0.816176	0.0497314	0.535707	0.653595	0.000945815	0.0262973	0.722884	0.000141157	0.00385501	0.803241	0.134229	0.758657	0.615741	0.000812315	0.0877783	0.803175	0.000151259	0.0253667	0.847222	0.0239787	0.432556	0.744444	>	6.3753	23	45	19	6	0.547619	0.882353	0.793103	0.703125	0.731183	1.16353e-05	0
HMGB1	11.0672	10.9513	11.4225	11.2483	0.21523	0.389396	0.297001	0.471167	4.01747e-05	0.00321253	0.733427	1.13109e-05	0.000535819	0.793301	0.0277373	0.487435	0.653595	0.00129307	0.031333	0.704365	0.000370283	0.00724298	0.762731	0.101968	0.734793	0.626543	0.0002393	0.0651871	0.803175	2.10069e-05	0.0131234	0.866667	0.0127352	0.398511	0.718519	>	11.3698	23	45	19	6	0.547619	0.882353	0.793103	0.703125	0.731183	1.16353e-05	0
EYA1	4.31358	4.34828	5.18501	5.06368	0.739893	0.861222	0.715399	0.836728	2.17648e-05	0.0023475	0.701681	3.63428e-05	0.00117752	0.723856	0.00039858	0.378067	0.672113	0.000231436	0.0117726	0.713624	0.000323789	0.00664436	0.736111	0.00192014	0.581574	0.683642	0.0128109	0.198068	0.673016	0.0113835	0.122949	0.694444	0.0245497	0.434696	0.644444	>	4.74265	23	45	19	6	0.547619	0.882353	0.793103	0.703125	0.731183	1.16353e-05	0
ZNF227	6.13213	6.16804	6.91973	6.08323	-0.0594602	0.777044	-0.0848138	0.751691	0.000522316	0.013667	0.698413	2.49341e-09	2.20133e-06	0.889706	0.667064	0.918717	0.556645	0.0020941	0.0416134	0.701058	9.51929e-08	3.3386e-05	0.87963	0.755568	0.970421	0.537037	0.0275825	0.261576	0.692063	1.14253e-06	0.00995408	0.913889	0.611582	0.874948	0.603704	>	6.63553	23	45	19	6	0.547619	0.882353	0.793103	0.703125	0.731183	1.16353e-05	0
PLCB2	5.40121	5.43709	5.21978	5.30089	-0.110873	-0.19198	-0.136203	-0.21731	0.000281317	0.00967954	0.710084	0.000177449	0.00349496	0.762255	0.0459736	0.526088	0.640523	0.00213588	0.0419847	0.699735	0.00107305	0.0150772	0.752315	0.093595	0.729833	0.62963	0.00422823	0.139637	0.734921	0.00199334	0.0597623	0.786111	0.0646563	0.50274	0.666667	<	5.20866	19	48	23	3	0.452381	0.941176	0.863636	0.676056	0.72043	1.23548e-05	0
S100A2	12.6752	12.3061	10.3814	12.25	-0.316679	-2.18523	-0.056138	-1.92469	4.79839e-05	0.00346298	0.694678	3.68591e-08	1.36454e-05	0.821078	0.308636	0.774355	0.526144	0.000107753	0.00788331	0.715608	2.03922e-07	5.09575e-05	0.841435	0.182604	0.788784	0.54784	0.0477211	0.314849	0.644444	0.0021902	0.0609809	0.772222	0.902823	0.975021	0.525926	<	11.0551	19	48	23	3	0.452381	0.941176	0.863636	0.676056	0.72043	1.23548e-05	0
ADAMTS2	5.37783	5.42293	5.18993	5.20808	-0.183021	-0.201173	-0.214856	-0.233008	0.0149568	0.09813	0.676471	0.032285	0.120502	0.715686	0.0689763	0.565103	0.624183	0.0407103	0.213215	0.667328	0.0661209	0.214617	0.707176	0.115686	0.741665	0.614198	0.0568783	0.336108	0.698413	0.0750058	0.297155	0.736111	0.102809	0.552254	0.648148	<	5.02314	19	48	23	3	0.452381	0.941176	0.863636	0.676056	0.72043	1.23548e-05	0
NCAPG	6.66496	6.57194	7.46022	7.01662	0.379018	0.822624	0.444675	0.888282	1.76514e-05	0.00212525	0.745565	6.04622e-06	0.000358665	0.79902	0.0345302	0.499555	0.674292	9.92987e-05	0.00746271	0.73545	2.36715e-05	0.00114303	0.792824	0.0472408	0.677709	0.658951	0.00140291	0.100658	0.769841	0.000597483	0.0390629	0.813889	0.057346	0.497463	0.711111	>	7.34364	19	48	23	3	0.452381	0.941176	0.863636	0.676056	0.72043	1.23548e-05	0
EEF1G	12.928	12.9695	13.1311	13.0708	0.130592	0.190865	0.101316	0.161589	4.71395e-05	0.00343661	0.723156	8.51656e-05	0.00216562	0.76634	0.00836881	0.427026	0.665577	0.000148135	0.00964617	0.722884	0.000262049	0.0057694	0.766204	0.0110002	0.581574	0.665123	0.0195069	0.232034	0.72381	0.0131818	0.130972	0.766667	0.0926367	0.539813	0.666667	>	13.12	19	48	23	3	0.452381	0.941176	0.863636	0.676056	0.72043	1.23548e-05	0
FBXO5	7.06662	7.03656	7.77858	7.30487	0.247086	0.720802	0.268304	0.74202	4.24117e-05	0.00328324	0.715219	3.46566e-06	0.000242595	0.777778	0.0615338	0.556365	0.631808	0.000234535	0.0118586	0.714947	2.09299e-05	0.00104844	0.78125	0.0698306	0.703845	0.626543	0.007638	0.169657	0.715873	0.00203654	0.0598888	0.769444	0.136527	0.589717	0.644444	>	7.65362	19	48	23	3	0.452381	0.941176	0.863636	0.676056	0.72043	1.23548e-05	0
EPB41	5.01083	5.16168	5.44644	5.03188	-0.0233135	0.391245	-0.129794	0.284764	0.00586568	0.0569227	0.634454	3.65139e-05	0.00117952	0.759804	0.733696	0.936216	0.53268	0.00328099	0.0537626	0.679233	4.11187e-05	0.00166397	0.795139	0.755132	0.970421	0.524691	0.400282	0.715617	0.526984	0.055579	0.257582	0.675	0.145649	0.599109	0.67037	>	5.33297	19	48	23	3	0.452381	0.941176	0.863636	0.676056	0.72043	1.23548e-05	0
PDZD4	4.77856	4.87334	4.65941	4.61002	-0.196418	-0.147026	-0.263322	-0.21393	0.0001303	0.00622289	0.749767	0.00598175	0.0388685	0.715686	0.000300191	0.378067	0.795207	0.00469459	0.0661378	0.704365	0.0483058	0.176444	0.672454	0.00503447	0.581574	0.746914	0.000183801	0.0614398	0.85873	0.00329856	0.0712882	0.819444	3.17091e-05	0.211299	0.911111	<	4.64558	25	43	17	8	0.595238	0.843137	0.757576	0.716667	0.731183	1.26296e-05	0
EIF4B	9.17083	9.19742	9.53346	9.47971	0.301063	0.354807	0.28229	0.336033	4.9061e-05	0.00351264	0.744164	0.00029958	0.00501583	0.763072	0.00181624	0.378067	0.718954	0.000407402	0.0160134	0.723545	0.00167574	0.0200357	0.729167	0.00639713	0.581574	0.716049	0.00640563	0.158731	0.793651	0.0092484	0.11089	0.844444	0.0070154	0.374986	0.725926	>	9.43103	25	43	17	8	0.595238	0.843137	0.757576	0.716667	0.731183	1.26296e-05	0
PCSK5	6.32813	6.10056	5.29588	6.04124	-0.219955	-0.965317	-0.0593201	-0.804682	0.00318744	0.0399127	0.690943	0.000102761	0.00246772	0.793301	0.444985	0.846301	0.554466	0.00378331	0.0582125	0.708995	0.000156211	0.00412525	0.810185	0.36533	0.875193	0.574074	0.112032	0.437086	0.647619	0.0057345	0.0893822	0.752778	0.86957	0.966552	0.507407	<	5.54082	25	43	17	8	0.595238	0.843137	0.757576	0.716667	0.731183	1.26296e-05	0
GJC1	4.89592	4.89995	5.55399	5.07852	0.181411	0.656885	0.178567	0.654041	0.00463901	0.0497524	0.645658	0.000295007	0.00496003	0.735294	0.306524	0.773912	0.526144	0.0140448	0.120176	0.642196	0.00150469	0.0186718	0.728009	0.362787	0.873677	0.527778	0.0791528	0.381188	0.653968	0.0161655	0.144565	0.752778	0.470899	0.813189	0.522222	>	5.34902	25	43	17	8	0.595238	0.843137	0.757576	0.716667	0.731183	1.26296e-05	0
SIAE	4.47238	4.47361	4.13977	4.27047	-0.202271	-0.332975	-0.203138	-0.333842	5.38633e-06	0.00114199	0.774977	6.52894e-06	0.000371852	0.821078	0.00588102	0.410689	0.713508	4.90412e-05	0.00507971	0.771164	4.82591e-05	0.00189166	0.819444	0.0114754	0.583792	0.70679	0.00162285	0.105676	0.784127	0.000989995	0.0470424	0.825	0.0253257	0.436634	0.72963	<	4.42644	36	30	6	21	0.857143	0.588235	0.631579	0.833333	0.709677	1.31518e-05	0
MGLL	8.24533	8.13973	7.4084	7.57909	-0.635181	-0.805872	-0.560633	-0.731325	3.35087e-05	0.00293804	0.76564	0.000189287	0.0036464	0.783497	0.00677991	0.425064	0.74183	3.82731e-05	0.00438275	0.769841	0.000160653	0.00421472	0.788194	0.00482847	0.581574	0.74537	0.00773649	0.169814	0.755556	0.0107892	0.120455	0.772222	0.0623733	0.501337	0.733333	<	8.22087	36	30	6	21	0.857143	0.588235	0.631579	0.833333	0.709677	1.31518e-05	0
TMPO	6.86408	6.91035	7.47483	7.15402	0.276333	0.597135	0.243677	0.56448	1.56004e-05	0.00209307	0.754435	7.42589e-06	0.000403399	0.805556	0.0251235	0.480692	0.686275	4.4056e-05	0.00473508	0.76455	2.10307e-05	0.00104844	0.813657	0.0212476	0.620524	0.699074	0.00599708	0.156307	0.730159	0.00266493	0.065044	0.786111	0.102696	0.552254	0.655556	>	6.93433	36	30	6	21	0.857143	0.588235	0.631579	0.833333	0.709677	1.31518e-05	0
KRT13	10.0545	8.57701	6.52629	8.2472	-1.37274	-3.09365	-0.329808	-2.05072	0.00012774	0.0061809	0.733427	2.57352e-05	0.000937107	0.787582	0.0796344	0.585499	0.66122	2.30759e-05	0.00342717	0.775132	4.14215e-06	0.000351598	0.825231	0.0224726	0.620524	0.708333	0.132977	0.465888	0.633333	0.0320203	0.19672	0.697222	0.743709	0.927479	0.548148	<	9.97695	36	30	6	21	0.857143	0.588235	0.631579	0.833333	0.709677	1.31518e-05	0
COPG2	4.5351	4.51556	4.83139	4.76299	0.233631	0.302031	0.247428	0.315828	0.000451771	0.0125785	0.72549	0.00158838	0.0157976	0.749183	0.0279629	0.488214	0.6939	0.000890032	0.0253625	0.726852	0.00215635	0.0236816	0.753472	0.0317102	0.648841	0.691358	0.0080415	0.170088	0.722222	0.0123025	0.12743	0.738889	0.0707454	0.516535	0.7	>	4.49782	36	30	6	21	0.857143	0.588235	0.631579	0.833333	0.709677	1.31518e-05	0
MRPL35	6.54287	6.47423	6.80246	6.72469	0.202009	0.279775	0.250465	0.328231	0.00112848	0.0215782	0.701681	0.00269161	0.0225668	0.705882	0.0322533	0.495355	0.696078	0.0057691	0.074072	0.687169	0.00917743	0.0614141	0.694444	0.0626452	0.701591	0.677469	0.00775769	0.169814	0.736508	0.0122387	0.12725	0.733333	0.0351046	0.465132	0.740741	>	6.50961	36	30	6	21	0.857143	0.588235	0.631579	0.833333	0.709677	1.31518e-05	0
FAM71E1	5.62689	5.61652	6.88162	6.10598	0.482138	1.25778	0.489457	1.2651	9.03725e-06	0.00151818	0.754902	7.40915e-07	8.46379e-05	0.804739	0.00291987	0.387853	0.688453	0.000113127	0.00806158	0.75	1.44533e-05	0.000823177	0.799769	0.00471837	0.581574	0.683642	0.00973725	0.180822	0.766667	0.00354536	0.0735221	0.816667	0.0522008	0.491157	0.7	>	6.55247	17	49	25	2	0.404762	0.960784	0.894737	0.662162	0.709677	1.36233e-05	0
CRYAB	8.97481	8.95509	7.52827	8.18146	-0.787549	-1.44074	-0.773632	-1.42682	2.11895e-05	0.00231475	0.752101	1.32261e-05	0.000602286	0.808007	0.0232552	0.472935	0.67756	4.58179e-05	0.00487205	0.761905	1.8264e-05	0.000965379	0.822917	0.0211065	0.620524	0.680556	0.00437582	0.139793	0.728571	0.00204013	0.0598888	0.772222	0.0985577	0.545756	0.67037	<	7.08964	17	49	25	2	0.404762	0.960784	0.894737	0.662162	0.709677	1.36233e-05	0
OSBPL10	5.32931	5.38278	5.17571	5.23107	-0.113962	-0.169327	-0.151708	-0.207074	0.000174811	0.00723529	0.716153	0.000331465	0.0053759	0.736111	0.0092983	0.427184	0.689542	0.0023712	0.0445349	0.70172	0.00277828	0.027826	0.725694	0.0311376	0.64395	0.669753	0.00344599	0.130471	0.750794	0.0054693	0.0876096	0.761111	0.0157824	0.409435	0.737037	<	5.09266	17	49	25	2	0.404762	0.960784	0.894737	0.662162	0.709677	1.36233e-05	0
NPAS2	5.61783	5.53627	5.09904	5.26114	-0.332699	-0.494804	-0.275128	-0.437233	4.13883e-05	0.00326058	0.715686	0.000127173	0.00281541	0.736928	0.00397495	0.399534	0.687364	8.31386e-05	0.00686098	0.728836	0.000229238	0.00526748	0.751157	0.00253727	0.581574	0.699074	0.020705	0.235464	0.684127	0.0240034	0.172276	0.702778	0.0640391	0.502363	0.659259	<	5.05689	17	49	25	2	0.404762	0.960784	0.894737	0.662162	0.709677	1.36233e-05	0
PTBP2	5.51619	5.68221	6.61849	5.80288	0.237863	1.05347	0.120667	0.936277	6.60264e-05	0.00429946	0.70028	8.85123e-07	9.66912e-05	0.779412	0.102437	0.60625	0.594771	0.00021909	0.0114956	0.71627	7.29216e-06	0.000518782	0.792824	0.0665904	0.703845	0.614198	0.0457639	0.308659	0.661905	0.00672852	0.0956941	0.747222	0.539135	0.844226	0.548148	>	6.31391	17	49	25	2	0.404762	0.960784	0.894737	0.662162	0.709677	1.36233e-05	0
LOC646014	5.35466	5.32172	5.08848	5.26147	-0.0834948	-0.256493	-0.0602447	-0.233242	0.00103216	0.0204499	0.679038	0.000126005	0.00280316	0.750817	0.212154	0.717334	0.583333	0.00137365	0.0323829	0.700066	0.000163067	0.00425661	0.774306	0.16871	0.784101	0.60108	0.0626184	0.34765	0.628571	0.0168817	0.147634	0.694444	0.513235	0.833136	0.540741	<	5.04913	17	49	25	2	0.404762	0.960784	0.894737	0.662162	0.709677	1.36233e-05	0
CCNJ	4.45156	4.50691	4.89607	4.6079	0.140058	0.428223	0.10099	0.389156	0.000739473	0.0166849	0.676004	3.23077e-05	0.00108548	0.778595	0.17331	0.681998	0.539216	0.00193553	0.0393243	0.681878	0.000136713	0.00379879	0.788194	0.173274	0.784101	0.540123	0.0604263	0.342854	0.661905	0.00921368	0.110825	0.755556	0.47572	0.815572	0.537037	>	4.89561	17	49	25	2	0.404762	0.960784	0.894737	0.662162	0.709677	1.36233e-05	0
C20orf202	3.74247	3.77249	3.6719	3.67657	-0.0747342	-0.0793959	-0.0959247	-0.100586	0.016755	0.104541	0.619048	0.0378647	0.133271	0.635621	0.0676838	0.56434	0.59695	0.0606974	0.263783	0.605159	0.0985678	0.27716	0.621528	0.14482	0.768108	0.583333	0.0448751	0.3065	0.652381	0.0664822	0.279387	0.669444	0.0819026	0.52542	0.62963	<	3.57233	17	49	25	2	0.404762	0.960784	0.894737	0.662162	0.709677	1.36233e-05	0
RFC3	5.96227	5.64143	6.41256	6.17641	0.308508	0.544652	0.534983	0.771126	0.000168	0.00710039	0.758637	0.00025611	0.00450696	0.786765	0.0469373	0.530272	0.721133	0.00602349	0.0758762	0.725529	0.00474628	0.0394852	0.751157	0.192566	0.794976	0.691358	6.84061e-06	0.037114	0.838095	1.52026e-05	0.0130718	0.872222	0.00066657	0.316797	0.792593	>	5.57164	42	17	0	34	1	0.333333	0.552632	1	0.634409	1.36346e-05	0
ELAVL1	6.69408	6.61686	7.10008	6.90909	0.237723	0.428712	0.292229	0.483219	1.60095e-05	0.00209692	0.753968	8.18317e-06	0.000431635	0.811275	0.0131752	0.447072	0.67756	0.00022385	0.0116186	0.738757	8.20424e-05	0.0026539	0.804398	0.0319592	0.650748	0.651235	0.00110144	0.0944213	0.790476	0.000562467	0.0382574	0.827778	0.0245468	0.434696	0.740741	>	6.43322	42	17	0	34	1	0.333333	0.552632	1	0.634409	1.36346e-05	0
C10orf54	6.38128	6.2645	5.6778	5.93769	-0.409238	-0.669129	-0.326803	-0.586695	6.42976e-06	0.00126017	0.74183	9.20074e-06	0.000471621	0.783497	0.00845891	0.427026	0.686275	2.3012e-05	0.00342717	0.749339	3.28228e-05	0.00142644	0.788194	0.0100843	0.581574	0.697531	0.00355156	0.132749	0.72381	0.0013946	0.0529022	0.772222	0.0533446	0.492587	0.659259	<	6.58128	42	17	0	34	1	0.333333	0.552632	1	0.634409	1.36346e-05	0
TPSAB1	7.50414	7.74407	6.76326	7.02816	-0.546543	-0.811446	-0.715904	-0.980808	9.10284e-05	0.00504085	0.71662	0.000220783	0.00406042	0.727941	0.0152355	0.447072	0.701525	0.0012843	0.0313102	0.689815	0.00180811	0.0210763	0.700231	0.046245	0.677709	0.675926	0.000487655	0.0797171	0.780952	0.000734137	0.0427344	0.794444	0.00675468	0.374986	0.762963	<	8.26348	42	17	0	34	1	0.333333	0.552632	1	0.634409	1.36346e-05	0
UTP15	5.19743	5.13907	5.47017	5.43728	0.257011	0.289905	0.298208	0.331102	0.00198104	0.0302754	0.689076	0.0080937	0.0474769	0.687908	0.0265169	0.485457	0.690632	0.00656492	0.0794976	0.694444	0.0176031	0.0935167	0.69213	0.0430248	0.668977	0.697531	0.0131783	0.200188	0.67619	0.0271418	0.182507	0.677778	0.042157	0.484297	0.674074	>	4.87216	42	17	0	34	1	0.333333	0.552632	1	0.634409	1.36346e-05	0
HNRPLL	6.40835	6.45995	6.73013	6.56883	0.1453	0.306605	0.10888	0.270185	4.35256e-06	0.00113003	0.75817	4.71657e-07	5.93012e-05	0.821078	0.0175756	0.454956	0.674292	8.75369e-06	0.00255984	0.781085	8.72358e-07	0.000129102	0.837963	0.0119086	0.583792	0.705247	0.0116468	0.190533	0.703175	0.00226898	0.0614623	0.780556	0.208176	0.651653	0.6	>	6.77476	15	50	27	1	0.357143	0.980392	0.9375	0.649351	0.698925	1.36518e-05	0
S100A7	8.71741	7.25242	5.10197	6.72494	-1.56159	-3.18456	-0.527473	-2.15045	3.95354e-05	0.00321253	0.743231	6.19937e-06	0.000364443	0.810458	0.0481618	0.534479	0.653595	1.18938e-05	0.00268835	0.770503	1.71462e-06	0.000195868	0.832176	0.0176919	0.61726	0.688272	0.0798581	0.382382	0.677778	0.0107797	0.120455	0.758333	0.59455	0.867117	0.57037	<	3.52761	15	50	27	1	0.357143	0.980392	0.9375	0.649351	0.698925	1.36518e-05	0
MAGOH	8.18291	8.25134	8.72496	8.38174	0.178708	0.521926	0.130406	0.473624	0.000171718	0.00716661	0.724556	3.61827e-06	0.000247715	0.791667	0.133115	0.639291	0.635076	0.000516883	0.0184848	0.732143	1.77659e-05	0.000948013	0.798611	0.133397	0.758657	0.643519	0.0312171	0.271096	0.706349	0.00213964	0.0609809	0.775	0.417759	0.78498	0.614815	>	8.84081	15	50	27	1	0.357143	0.980392	0.9375	0.649351	0.698925	1.36518e-05	0
LMAN1	8.47606	8.52695	9.15808	8.62681	0.13578	0.667051	0.0998616	0.631133	0.000138356	0.00640636	0.70775	2.96006e-07	4.51715e-05	0.835784	0.321602	0.779828	0.537037	0.000507323	0.0182408	0.71164	2.32396e-06	0.000245811	0.83912	0.318595	0.853613	0.541667	0.0196432	0.232154	0.698413	0.000249019	0.0291119	0.827778	0.579675	0.862568	0.525926	>	9.24729	15	50	27	1	0.357143	0.980392	0.9375	0.649351	0.698925	1.36518e-05	0
SPRR2G	6.1652	5.66989	4.92369	5.90435	-0.115174	-1.09583	0.234456	-0.746201	0.0390358	0.172265	0.700747	0.00353772	0.0271487	0.812908	0.804172	0.95634	0.551198	0.0255344	0.164611	0.721561	0.00267547	0.0272884	0.831019	0.612796	0.941615	0.575617	0.419741	0.728366	0.650794	0.0316865	0.19587	0.769444	0.658726	0.895822	0.507407	<	4.65344	15	50	27	1	0.357143	0.980392	0.9375	0.649351	0.698925	1.36518e-05	0
C18orf10	7.3488	7.19499	7.75239	7.53377	0.23021	0.448825	0.338785	0.5574	8.35566e-05	0.00477284	0.697946	2.52512e-05	0.000927083	0.744281	0.0261356	0.483775	0.636166	0.00211073	0.0417779	0.657407	0.00057203	0.00969838	0.71412	0.0979349	0.734793	0.58179	0.000998999	0.0910217	0.795238	0.000421642	0.0361419	0.816667	0.0150049	0.407665	0.766667	>	7.79326	15	50	27	1	0.357143	0.980392	0.9375	0.649351	0.698925	1.36518e-05	0
KIF26B	4.58242	4.58002	4.37519	4.53193	-0.049788	-0.206529	-0.0480894	-0.204831	0.000372703	0.0114658	0.697012	1.07266e-05	0.00051671	0.785948	0.272946	0.756163	0.578431	0.00179523	0.0377376	0.689153	9.94221e-05	0.00302059	0.77662	0.321414	0.854748	0.572531	0.0177791	0.224711	0.715873	0.0015325	0.0555053	0.808333	0.386012	0.767983	0.592593	<	4.31739	15	50	27	1	0.357143	0.980392	0.9375	0.649351	0.698925	1.36518e-05	0
S100A11	11.7444	11.4967	10.9466	11.5377	-0.133882	-0.724908	0.0409419	-0.550084	0.000174389	0.00723279	0.688609	2.48228e-06	0.000196918	0.781863	0.16567	0.674836	0.56427	0.000180751	0.0104736	0.738095	6.69316e-06	0.000490121	0.819444	0.0395775	0.668537	0.62963	0.158628	0.49837	0.569841	0.0275781	0.183508	0.691667	0.751669	0.930391	0.592593	<	11.1643	15	50	27	1	0.357143	0.980392	0.9375	0.649351	0.698925	1.36518e-05	0
BTBD3	7.62351	7.68452	8.42927	7.62996	-0.0114946	0.787818	-0.0545625	0.74475	0.000584225	0.0146567	0.681606	5.29273e-08	1.67948e-05	0.856209	0.932738	0.985414	0.551198	0.00217292	0.0422968	0.685847	1.41092e-06	0.000173451	0.84375	0.96708	0.997793	0.524691	0.0440423	0.304982	0.671429	0.000150066	0.0253667	0.886111	0.744552	0.927642	0.614815	>	8.3893	15	50	27	1	0.357143	0.980392	0.9375	0.649351	0.698925	1.36518e-05	0
RNF114	8.62876	8.68345	9.0979	8.83443	0.18959	0.453054	0.150987	0.414451	0.00053447	0.0138581	0.677404	0.000188399	0.00364597	0.714052	0.0419337	0.518229	0.62854	0.00166177	0.0363861	0.691799	0.000758755	0.0119435	0.722222	0.0448835	0.676055	0.651235	0.0564754	0.335214	0.642857	0.0296617	0.189628	0.694444	0.196164	0.64235	0.574074	>	9.16083	15	50	27	1	0.357143	0.980392	0.9375	0.649351	0.698925	1.36518e-05	0
ALDOB	3.481	3.48979	3.43106	3.44636	-0.0372232	-0.0525284	-0.0434225	-0.0587276	0.0110973	0.0822258	0.664799	0.0145528	0.0701531	0.708333	0.104351	0.60901	0.606754	0.0385698	0.206715	0.657407	0.0440677	0.166438	0.699074	0.187328	0.791152	0.601852	0.0759878	0.37342	0.68254	0.0829164	0.311458	0.730556	0.209532	0.653211	0.618519	<	3.38395	15	50	27	1	0.357143	0.980392	0.9375	0.649351	0.698925	1.36518e-05	0
GPRC5D	5.62849	5.77044	5.02227	5.77474	0.104502	-0.647973	0.00429915	-0.748176	0.0780305	0.256214	0.655929	0.00219982	0.0196851	0.794118	0.668539	0.919269	0.528322	0.140301	0.407847	0.652116	0.00355953	0.0327618	0.792824	0.546244	0.925743	0.535494	0.12958	0.462322	0.665079	0.0105441	0.119135	0.797222	0.98995	0.99648	0.511111	<	4.74872	15	50	27	1	0.357143	0.980392	0.9375	0.649351	0.698925	1.36518e-05	0
C11orf49	6.50106	6.53472	6.72064	6.62674	0.115787	0.209684	0.0920248	0.185922	0.00253443	0.0350412	0.650794	0.00199038	0.0183532	0.683824	0.0597712	0.551147	0.606754	0.00540369	0.0719209	0.661376	0.00455729	0.0385221	0.69213	0.0661136	0.703845	0.62037	0.0958805	0.412895	0.625397	0.0676229	0.281878	0.663889	0.24463	0.681779	0.574074	>	6.80665	15	50	27	1	0.357143	0.980392	0.9375	0.649351	0.698925	1.36518e-05	0
GAA	8.0498	7.8525	7.37122	8.05506	0.0632959	-0.620549	0.202564	-0.48128	0.00634275	0.0595295	0.635854	6.98454e-06	0.000388936	0.773693	0.616358	0.905344	0.54793	0.00454539	0.0651375	0.664021	9.79877e-06	0.000625198	0.791667	0.968448	0.99784	0.506173	0.320609	0.656946	0.568254	0.0153533	0.14102	0.730556	0.226474	0.668172	0.648148	<	7.26905	15	50	27	1	0.357143	0.980392	0.9375	0.649351	0.698925	1.36518e-05	0
C6orf134	4.75474	4.7669	5.12989	4.96778	0.209467	0.371575	0.200884	0.362992	2.81116e-06	0.000966553	0.760971	1.91447e-06	0.00016568	0.79085	0.00307676	0.387853	0.721133	2.70389e-05	0.0037073	0.763228	1.75354e-05	0.00094234	0.796296	0.0055414	0.581574	0.719136	0.0031895	0.127549	0.755556	0.00176076	0.0577039	0.777778	0.0308025	0.45211	0.725926	>	5.08136	20	47	22	4	0.47619	0.921569	0.833333	0.681159	0.72043	1.36554e-05	0
NUP160	5.71755	5.8316	6.31922	6.05155	0.300454	0.568126	0.219949	0.487622	5.25819e-06	0.00114199	0.755836	9.31097e-07	0.000100614	0.825163	0.0102168	0.427764	0.663399	7.7378e-06	0.00245534	0.780423	1.05853e-06	0.000144939	0.842593	0.00553288	0.581574	0.697531	0.0169033	0.221944	0.696825	0.00455595	0.0816799	0.783333	0.195729	0.641762	0.581481	>	6.23454	20	47	22	4	0.47619	0.921569	0.833333	0.681159	0.72043	1.36554e-05	0
MAPK11	5.04376	5.04304	4.81555	4.91978	-0.123771	-0.227995	-0.123264	-0.227488	9.4862e-05	0.00519558	0.737162	4.03061e-05	0.00126692	0.794118	0.0482347	0.534809	0.66122	0.000217672	0.0114815	0.746693	5.83418e-05	0.00214395	0.804398	0.0526226	0.688749	0.669753	0.00821821	0.170088	0.714286	0.00278436	0.0656903	0.769444	0.156352	0.610012	0.640741	<	4.81492	20	47	22	4	0.47619	0.921569	0.833333	0.681159	0.72043	1.36554e-05	0
GPC1	8.09904	7.71572	6.85341	7.87016	-0.116141	-1.13289	0.154438	-0.86231	0.000119671	0.00599586	0.70915	1.16195e-07	2.8593e-05	0.853758	0.569561	0.891972	0.51634	6.04878e-05	0.0058416	0.741402	9.30417e-08	3.32142e-05	0.877315	0.280097	0.83611	0.560185	0.106747	0.428826	0.631746	0.00182961	0.0580842	0.797222	0.530961	0.84077	0.588889	<	7.06257	20	47	22	4	0.47619	0.921569	0.833333	0.681159	0.72043	1.36554e-05	0
LPCAT4	4.95165	4.84637	4.53123	4.85008	-0.0706065	-0.389452	0.00370629	-0.31514	0.000275055	0.00952924	0.706816	2.00549e-06	0.000172067	0.821078	0.386987	0.819345	0.554466	0.000258758	0.0126739	0.72619	2.88825e-06	0.000283035	0.834491	0.241692	0.816297	0.58179	0.0811047	0.385833	0.660317	0.00385641	0.0758011	0.788889	0.971294	0.99236	0.511111	<	4.58524	20	47	22	4	0.47619	0.921569	0.833333	0.681159	0.72043	1.36554e-05	0
RFX3	3.64565	3.63101	3.97174	3.77614	0.134796	0.330394	0.145135	0.340733	8.00035e-05	0.00469017	0.701214	7.19976e-06	0.000396503	0.771242	0.0294556	0.489406	0.607843	0.000873309	0.0252383	0.695767	0.000131779	0.00370516	0.763889	0.0658781	0.703845	0.604938	0.0119695	0.192245	0.714286	0.00330338	0.0713152	0.788889	0.0920924	0.539572	0.614815	>	3.87843	20	47	22	4	0.47619	0.921569	0.833333	0.681159	0.72043	1.36554e-05	0
FAM171A1	7.11213	7.50144	8.40532	7.51626	0.289626	1.17868	0.0148217	0.903878	0.000345674	0.0108941	0.689542	3.47067e-06	0.000242595	0.772059	0.285031	0.762994	0.579521	0.000298718	0.0135106	0.712963	4.4326e-06	0.000364659	0.795139	0.172509	0.784101	0.603395	0.108253	0.431255	0.633333	0.00526658	0.0860165	0.716667	0.966068	0.991014	0.522222	>	8.17848	20	47	22	4	0.47619	0.921569	0.833333	0.681159	0.72043	1.36554e-05	0
ING4	7.34324	7.34874	7.60376	7.35757	0.0127134	0.258905	0.00882953	0.255021	0.00955857	0.0755577	0.634454	0.000136156	0.00294898	0.749183	0.855812	0.967896	0.518519	0.02412	0.159229	0.640873	0.000839778	0.012786	0.747685	0.85817	0.983788	0.501543	0.0895026	0.403347	0.619048	0.00464675	0.0820839	0.752778	0.918355	0.977633	0.559259	>	7.57216	20	47	22	4	0.47619	0.921569	0.833333	0.681159	0.72043	1.36554e-05	0
SEPSECS	4.76661	4.7022	5.2297	4.8929	0.145233	0.482034	0.190694	0.527495	2.66459e-05	0.00257731	0.742297	1.96753e-07	3.81872e-05	0.84232	0.134469	0.642335	0.608932	0.000405709	0.0160134	0.730159	5.27091e-06	0.000421483	0.828704	0.235711	0.813708	0.598765	0.00130247	0.10004	0.771429	1.96166e-05	0.0130718	0.875	0.127314	0.579154	0.633333	>	5.0519	26	42	16	9	0.619048	0.823529	0.742857	0.724138	0.731183	1.43333e-05	0
S100A10	12.3858	12.1498	11.4113	12.0802	-0.236149	-0.905121	-0.0695743	-0.738546	7.30239e-06	0.00133928	0.729225	2.53267e-09	2.20133e-06	0.86683	0.103356	0.607032	0.545752	1.27072e-05	0.00268835	0.763228	9.76411e-09	9.21108e-06	0.893519	0.0527819	0.688749	0.589506	0.0433796	0.303611	0.647619	0.00108807	0.0485685	0.802778	0.749781	0.929825	0.559259	<	11.9672	26	42	16	9	0.619048	0.823529	0.742857	0.724138	0.731183	1.43333e-05	0
SAP30	5.56883	5.79501	6.13621	5.86341	0.228058	0.500858	0.0684014	0.341201	4.68621e-05	0.00343157	0.727824	1.19621e-05	0.000558725	0.779412	0.0394516	0.51044	0.659041	1.35412e-05	0.00273054	0.766534	4.25387e-06	0.000355812	0.815972	0.00936737	0.581574	0.700617	0.105946	0.427611	0.634921	0.0312495	0.19493	0.691667	0.627319	0.880978	0.559259	>	5.90434	26	42	16	9	0.619048	0.823529	0.742857	0.724138	0.731183	1.43333e-05	0
LOC100292688	2.61412	2.59054	2.72373	2.69488	0.0876982	0.116544	0.104341	0.133186	0.000214669	0.00834392	0.727591	0.000606492	0.00815845	0.752451	0.0182844	0.460357	0.694444	0.00250567	0.0458288	0.696429	0.00459117	0.038694	0.721065	0.0556539	0.692287	0.66358	0.00194112	0.112123	0.802381	0.00235435	0.0626822	0.827778	0.0213407	0.422286	0.768519	>	2.70325	26	42	16	9	0.619048	0.823529	0.742857	0.724138	0.731183	1.43333e-05	0
HNRNPA3P1	2.63136	2.65268	2.77882	2.79882	0.161184	0.141182	0.146135	0.126133	0.000102456	0.00541714	0.725023	0.000734847	0.00928006	0.719771	0.000904668	0.378067	0.732026	0.000407725	0.0160134	0.73545	0.00175561	0.0207222	0.730324	0.00222602	0.581574	0.742284	0.0278535	0.26214	0.7	0.0422262	0.224555	0.694444	0.0429068	0.484297	0.707407	>	2.72745	26	42	16	9	0.619048	0.823529	0.742857	0.724138	0.731183	1.43333e-05	0
ZNF473	5.85256	5.93196	6.51933	5.9283	0.0523799	0.643414	-0.00366447	0.58737	0.000155897	0.00680467	0.723156	7.25493e-09	4.14381e-06	0.870915	0.666392	0.918717	0.526144	0.000381142	0.0154239	0.727513	3.91203e-08	2.07913e-05	0.873843	0.567018	0.929913	0.532407	0.0362674	0.28388	0.712698	6.79056e-05	0.0180167	0.863889	0.982864	0.99416	0.511111	>	6.20059	26	42	16	9	0.619048	0.823529	0.742857	0.724138	0.731183	1.43333e-05	0
DHX57	4.86287	4.92186	5.16052	4.99066	0.110435	0.280301	0.0687927	0.238658	0.000390229	0.0118608	0.718487	1.86668e-05	0.000761451	0.781863	0.10333	0.607032	0.633987	0.000549777	0.0192818	0.747354	2.55614e-05	0.00120379	0.81713	0.0738022	0.708446	0.654321	0.0851868	0.394206	0.649206	0.0192833	0.156386	0.697222	0.513998	0.833421	0.585185	>	5.00422	26	42	16	9	0.619048	0.823529	0.742857	0.724138	0.731183	1.43333e-05	0
BOK	5.96794	5.91783	5.42609	5.827	-0.126201	-0.527117	-0.0908293	-0.491745	3.08181e-05	0.00281318	0.749767	5.05277e-07	6.15915e-05	0.847222	0.191606	0.700202	0.619826	9.18659e-05	0.00717379	0.759921	2.40926e-06	0.000250931	0.853009	0.164822	0.782198	0.635802	0.00924355	0.176324	0.725397	0.000505372	0.0375671	0.833333	0.410117	0.781082	0.581481	<	5.76213	27	41	15	10	0.642857	0.803922	0.72973	0.732143	0.731183	1.59931e-05	0
ATP11C	5.20155	5.25453	5.66199	5.54424	0.327109	0.44486	0.28971	0.407461	1.44229e-05	0.00197485	0.746965	2.36423e-05	0.000880135	0.79085	0.00342913	0.396867	0.688453	6.50593e-05	0.00614986	0.759259	8.42389e-05	0.00268975	0.798611	0.00541929	0.581574	0.70679	0.00836022	0.170889	0.71746	0.00510957	0.085553	0.772222	0.0514197	0.489601	0.644444	>	5.41557	27	41	15	10	0.642857	0.803922	0.72973	0.732143	0.731183	1.59931e-05	0
RNF219	5.89992	5.84077	6.15884	6.0567	0.174173	0.276312	0.21593	0.318069	0.000113271	0.00579239	0.735761	3.15227e-05	0.00106809	0.791667	0.0229728	0.472935	0.66122	0.00164071	0.0361898	0.708333	0.000457606	0.00835005	0.768519	0.0680961	0.703845	0.628086	0.00290946	0.122488	0.801587	0.000509177	0.0376998	0.847222	0.0452798	0.485421	0.740741	>	6.04707	27	41	15	10	0.642857	0.803922	0.72973	0.732143	0.731183	1.59931e-05	0
CCNT1	5.66276	5.58282	6.0183	5.86061	0.221361	0.379056	0.27779	0.435485	0.00171226	0.027784	0.718021	0.00225825	0.0199667	0.730392	0.0719072	0.569823	0.701525	0.00695617	0.082384	0.708995	0.00695318	0.051477	0.721065	0.11448	0.739974	0.692901	0.0105839	0.183529	0.739683	0.0121547	0.126942	0.752778	0.0654739	0.504972	0.722222	>	5.81586	27	41	15	10	0.642857	0.803922	0.72973	0.732143	0.731183	1.59931e-05	0
POLD3	6.24576	6.22584	6.5273	6.36958	0.129682	0.2874	0.143743	0.301461	0.00274339	0.0367732	0.711951	0.00168665	0.0164436	0.745098	0.158181	0.666429	0.667756	0.00612495	0.0762944	0.700397	0.00330885	0.0312016	0.736111	0.179505	0.786727	0.652778	0.0287023	0.263326	0.739683	0.0187494	0.15431	0.766667	0.214749	0.657362	0.703704	>	6.36012	27	41	15	10	0.642857	0.803922	0.72973	0.732143	0.731183	1.59931e-05	0
CASC2	3.00427	3.01147	3.11126	3.06665	0.0602677	0.104875	0.0551812	0.0997881	0.00680177	0.0622308	0.702614	0.00499067	0.0343871	0.748366	0.155505	0.66241	0.641612	0.00685606	0.0816317	0.699074	0.00346209	0.0321761	0.746528	0.130972	0.756503	0.635802	0.110875	0.435719	0.711111	0.0810409	0.30878	0.752778	0.396447	0.774832	0.655556	>	3.0538	27	41	15	10	0.642857	0.803922	0.72973	0.732143	0.731183	1.59931e-05	0
ZNF551	4.36806	4.3761	4.67617	4.36689	-0.00352852	0.305744	-0.00920902	0.300063	0.00124089	0.0228003	0.669468	2.64349e-07	4.14609e-05	0.836601	0.951474	0.989973	0.553377	0.00438356	0.0641051	0.671958	4.15072e-06	0.000351598	0.833333	0.985664	0.998964	0.54321	0.0520047	0.323542	0.663492	0.000533322	0.0379947	0.844444	0.909707	0.976508	0.577778	>	4.54559	24	44	18	7	0.571429	0.862745	0.774194	0.709677	0.731183	1.6565e-05	0
ALPP	3.69517	3.81095	3.54015	3.60364	-0.125585	-0.189078	-0.207317	-0.270809	0.000416475	0.0121299	0.736695	0.000977602	0.0112155	0.758987	0.0256535	0.480692	0.706972	0.00864905	0.092929	0.706349	0.00999418	0.0649102	0.733796	0.105143	0.736167	0.669753	0.000386751	0.0784806	0.809524	0.00118335	0.0496837	0.819444	0.00402846	0.363531	0.796296	<	3.76233	38	26	4	25	0.904762	0.509804	0.603175	0.866667	0.688172	1.70836e-05	0
SF4	6.71021	6.64285	6.87474	6.81074	0.120339	0.184341	0.167889	0.23189	2.36017e-05	0.00244467	0.736228	6.76431e-05	0.0018249	0.761438	0.00771256	0.425064	0.702614	0.00107486	0.0280516	0.678571	0.00159591	0.0194417	0.712963	0.045643	0.677709	0.632716	9.0916e-05	0.0491217	0.874603	0.000212567	0.028145	0.877778	0.000960755	0.316797	0.87037	>	6.68657	38	26	4	25	0.904762	0.509804	0.603175	0.866667	0.688172	1.70836e-05	0
PSMB4	10.3379	10.2752	10.5755	10.5271	0.207635	0.256004	0.25188	0.300249	5.5186e-05	0.00377816	0.728291	0.000368475	0.00579558	0.742647	0.00892887	0.427184	0.70915	0.000288366	0.0132828	0.719577	0.000985009	0.0142278	0.732639	0.0161377	0.608634	0.70216	0.000696558	0.0843933	0.749206	0.0019983	0.0598026	0.766667	0.0158033	0.409435	0.725926	>	10.2939	38	26	4	25	0.904762	0.509804	0.603175	0.866667	0.688172	1.70836e-05	0
E2F8	6.02346	5.41319	6.48539	6.07129	0.227327	0.641425	0.658107	1.07221	0.00456213	0.049405	0.669001	0.00241857	0.0208944	0.722222	0.265405	0.751896	0.598039	0.0893989	0.323178	0.615079	0.0312158	0.133427	0.677083	0.806312	0.978462	0.532407	8.16176e-05	0.0466177	0.798413	0.000197548	0.0272358	0.830556	0.00264864	0.347555	0.755556	>	5.69632	38	26	4	25	0.904762	0.509804	0.603175	0.866667	0.688172	1.70836e-05	0
MSH6	6.34323	6.4633	6.8509	6.58922	0.210674	0.472358	0.125912	0.387596	1.37526e-06	0.000644862	0.784314	1.54328e-07	3.41453e-05	0.85049	0.0211559	0.469558	0.696078	8.52233e-07	0.000774409	0.812831	8.3305e-08	3.02791e-05	0.878472	0.0079176	0.581574	0.725309	0.010569	0.183529	0.715873	0.00138473	0.0529022	0.783333	0.291224	0.715657	0.625926	>	6.56064	28	40	14	11	0.666667	0.784314	0.717949	0.740741	0.731183	1.76958e-05	0
FFAR2	4.40827	4.24919	3.72319	3.76694	-0.594542	-0.638296	-0.48225	-0.526004	8.95266e-05	0.00499924	0.75957	0.00132048	0.0138862	0.761438	0.00959836	0.427184	0.757081	0.000110199	0.00792439	0.772487	0.00142232	0.0180076	0.773148	0.00978745	0.581574	0.771605	0.00225809	0.115019	0.728571	0.00572623	0.0893622	0.733333	0.0321539	0.456912	0.722222	<	3.76783	28	40	14	11	0.666667	0.784314	0.717949	0.740741	0.731183	1.76958e-05	0
PIGC	6.43545	6.42253	6.73081	6.53297	0.101322	0.299164	0.110439	0.308281	0.000134192	0.0063361	0.753035	1.62564e-05	0.000694405	0.826797	0.153353	0.661653	0.654684	0.000844234	0.0248869	0.751984	0.000132809	0.00371642	0.825231	0.21296	0.812698	0.654321	0.00236685	0.115019	0.755556	0.000222672	0.0284391	0.830556	0.13736	0.589998	0.655556	>	6.56824	28	40	14	11	0.666667	0.784314	0.717949	0.740741	0.731183	1.76958e-05	0
KIFC2	6.83056	6.62106	6.19686	6.39667	-0.372274	-0.572082	-0.224394	-0.424201	5.89207e-05	0.00395263	0.730159	0.000100644	0.00244172	0.756536	0.0124514	0.443867	0.694989	9.37014e-05	0.00721867	0.74537	0.000187926	0.00462664	0.769676	0.010756	0.581574	0.712963	0.0335968	0.274457	0.693651	0.0167592	0.146983	0.725	0.139898	0.591017	0.651852	<	6.4335	28	40	14	11	0.666667	0.784314	0.717949	0.740741	0.731183	1.76958e-05	0
NRTN	4.76745	4.70671	5.68366	5.1801	0.430522	0.934079	0.473397	0.976954	5.10812e-05	0.00357145	0.721289	3.38555e-06	0.000240311	0.794118	0.0265456	0.485457	0.624183	0.000620815	0.0206158	0.709656	6.64709e-05	0.00233126	0.782407	0.0611656	0.698523	0.612654	0.00740561	0.168234	0.749206	0.00127244	0.051432	0.822222	0.0850257	0.531197	0.651852	>	5.14876	28	40	14	11	0.666667	0.784314	0.717949	0.740741	0.731183	1.76958e-05	0
MAFB	9.95319	9.66241	9.08143	9.48433	-0.383334	-0.786237	-0.178079	-0.580982	7.50959e-05	0.00454922	0.733427	2.96436e-05	0.00102365	0.765523	0.0327319	0.495825	0.690632	3.60374e-05	0.00428824	0.756614	1.58231e-05	0.000881113	0.793981	0.00988038	0.581574	0.70679	0.0808925	0.385448	0.677778	0.0320018	0.19672	0.697222	0.450783	0.801776	0.651852	<	9.89785	35	31	7	20	0.833333	0.607843	0.636364	0.815789	0.709677	1.79799e-05	0
FANCI	7.45103	7.39431	7.99065	7.82764	0.393292	0.556297	0.433331	0.596337	0.000152473	0.006749	0.739963	0.000489154	0.00701483	0.76634	0.0194725	0.467856	0.704793	0.000618196	0.0206134	0.747354	0.00133447	0.0173488	0.769676	0.0300543	0.64222	0.717593	0.00273213	0.122241	0.722222	0.00413691	0.0782476	0.758333	0.0318051	0.456912	0.674074	>	7.79341	29	39	13	12	0.690476	0.764706	0.707317	0.75	0.731183	1.95221e-05	0
KLF10	9.65077	9.48997	9.21656	9.30975	-0.29373	-0.386916	-0.18022	-0.273406	0.00082804	0.0178185	0.714753	0.00254563	0.0216961	0.729575	0.0131995	0.447072	0.694989	0.000632329	0.0208596	0.73545	0.00208326	0.0231369	0.748843	0.00591634	0.581574	0.717593	0.135521	0.46885	0.665079	0.145178	0.409435	0.683333	0.220276	0.661111	0.640741	<	9.34521	29	39	13	12	0.690476	0.764706	0.707317	0.75	0.731183	1.95221e-05	0
GJB2	10.8185	10.3415	8.43837	9.86235	-0.81587	-2.23985	-0.479123	-1.90311	1.5424e-05	0.00208339	0.742764	4.28688e-07	5.71327e-05	0.813725	0.0469423	0.530272	0.648148	5.27724e-05	0.0052248	0.763228	3.19204e-06	0.000301398	0.825231	0.0406575	0.668537	0.680556	0.0214696	0.238428	0.693651	0.00172935	0.0573323	0.786111	0.333514	0.738778	0.57037	<	8.92304	21	46	21	5	0.5	0.901961	0.807692	0.686567	0.72043	2.04828e-05	0
IL18	6.6863	6.43941	5.26612	6.07323	-0.540459	-1.34757	-0.366183	-1.17329	5.50761e-05	0.00377816	0.728758	2.90435e-06	0.00021626	0.805556	0.0819703	0.586902	0.626362	0.000183352	0.0104773	0.738757	1.70148e-05	0.000919304	0.80787	0.0845795	0.71691	0.646605	0.0141756	0.208198	0.704762	0.000470761	0.0372816	0.8	0.303777	0.723642	0.577778	<	5.48568	21	46	21	5	0.5	0.901961	0.807692	0.686567	0.72043	2.04828e-05	0
HOXC9	3.78442	4.14973	4.93225	4.4152	0.523339	1.04039	0.265473	0.782522	1.75995e-05	0.00212525	0.726891	7.15199e-06	0.00039496	0.751634	0.00310147	0.387853	0.6939	1.7035e-05	0.00286058	0.763228	9.40905e-06	0.000612692	0.783565	0.000448663	0.581574	0.736111	0.0758646	0.37342	0.639683	0.0374054	0.212073	0.675	0.302747	0.723301	0.592593	>	4.57349	21	46	21	5	0.5	0.901961	0.807692	0.686567	0.72043	2.04828e-05	0
RBM4	6.33612	6.37117	6.64381	6.40462	0.0581958	0.29738	0.0334556	0.27264	0.000102972	0.00541714	0.715219	2.9989e-07	4.54175e-05	0.827614	0.283985	0.76243	0.565359	0.000425547	0.016415	0.722222	4.01925e-06	0.000343371	0.829861	0.267434	0.830089	0.578704	0.0280493	0.262393	0.698413	0.00089629	0.0453196	0.822222	0.633748	0.884478	0.533333	>	6.52978	21	46	21	5	0.5	0.901961	0.807692	0.686567	0.72043	2.04828e-05	0
SLC16A10	4.77523	4.8475	5.47511	5.17565	0.379166	0.67863	0.328146	0.627609	0.000451437	0.0125785	0.694211	0.00047483	0.00689417	0.718954	0.0159073	0.447072	0.66122	0.00134736	0.0319893	0.70172	0.00142698	0.0180403	0.722222	0.0173612	0.617093	0.674383	0.0458847	0.308865	0.67619	0.0384006	0.214672	0.711111	0.102066	0.550491	0.62963	>	5.41637	21	46	21	5	0.5	0.901961	0.807692	0.686567	0.72043	2.04828e-05	0
TMEM229B	4.61081	4.68976	4.52031	4.53842	-0.0956124	-0.113727	-0.15134	-0.169455	0.0145243	0.0963998	0.683007	0.0292932	0.112941	0.69281	0.0597154	0.551147	0.669935	0.0939077	0.331456	0.642196	0.12538	0.321261	0.658565	0.199205	0.799973	0.62037	0.0150299	0.210435	0.780952	0.0267331	0.181425	0.775	0.0193668	0.416279	0.788889	<	4.44456	21	46	21	5	0.5	0.901961	0.807692	0.686567	0.72043	2.04828e-05	0
KDELC1	6.57475	6.69158	7.08882	6.84497	0.235853	0.479703	0.153384	0.397235	0.00562768	0.0554654	0.676937	0.00226601	0.0199822	0.719771	0.125432	0.633372	0.619826	0.00949376	0.0980269	0.684524	0.00472729	0.03936	0.72338	0.125642	0.747334	0.632716	0.160219	0.499517	0.65873	0.0778873	0.303517	0.711111	0.43903	0.795315	0.588889	>	7.13957	21	46	21	5	0.5	0.901961	0.807692	0.686567	0.72043	2.04828e-05	0
IFT88	6.72184	6.71546	7.15892	6.78744	0.0674721	0.438957	0.0719756	0.443461	0.00695971	0.0631561	0.671335	2.94911e-05	0.00102365	0.763889	0.607457	0.902741	0.54793	0.0197269	0.14396	0.665344	0.000200209	0.00481635	0.758102	0.660408	0.95229	0.541667	0.0844709	0.392335	0.685714	0.00197335	0.0596284	0.777778	0.713231	0.91663	0.562963	>	7.13922	21	46	21	5	0.5	0.901961	0.807692	0.686567	0.72043	2.04828e-05	0
SETMAR	4.62799	4.71643	5.01384	4.76618	0.112183	0.359844	0.0497533	0.297414	0.00355245	0.0424489	0.663866	0.000689397	0.00887998	0.729575	0.142118	0.648249	0.576253	0.00609132	0.0762502	0.69246	0.001847	0.0213586	0.748843	0.11099	0.737742	0.617284	0.186232	0.532876	0.595238	0.0837759	0.313333	0.683333	0.622621	0.878509	0.522222	>	4.90917	21	46	21	5	0.5	0.901961	0.807692	0.686567	0.72043	2.04828e-05	0
PTGDR	3.11021	3.10737	3.00322	3.06352	-0.0458514	-0.10616	-0.0438414	-0.10415	0.0151143	0.0984523	0.656863	0.00816016	0.0477266	0.716503	0.26842	0.753958	0.577342	0.0285209	0.175135	0.657407	0.0161356	0.0881894	0.71875	0.300627	0.846145	0.575617	0.109861	0.43373	0.655556	0.0645131	0.275809	0.711111	0.411645	0.781797	0.581481	<	2.97458	21	46	21	5	0.5	0.901961	0.807692	0.686567	0.72043	2.04828e-05	0
CMTM4	6.5104	6.63777	6.79116	6.79117	0.243312	0.243298	0.153403	0.153389	0.0156648	0.100596	0.653128	0.0441175	0.148202	0.614379	0.0160327	0.447072	0.704793	0.0151797	0.125288	0.672619	0.0415258	0.159877	0.631944	0.0108114	0.581574	0.726852	0.356916	0.686399	0.606349	0.433862	0.691226	0.572222	0.275804	0.705516	0.651852	>	6.90885	21	46	21	5	0.5	0.901961	0.807692	0.686567	0.72043	2.04828e-05	0
ZNF550	4.92563	4.95534	5.3691	4.89494	-0.039427	0.434738	-0.0604035	0.413761	0.0132917	0.0915632	0.62465	6.01842e-05	0.00166871	0.763889	0.661275	0.918535	0.561002	0.0279957	0.173431	0.636905	0.000419899	0.00788928	0.769676	0.764937	0.972891	0.540123	0.167755	0.508921	0.595238	0.0129216	0.130138	0.75	0.606897	0.872841	0.611111	>	5.21049	21	46	21	5	0.5	0.901961	0.807692	0.686567	0.72043	2.04828e-05	0
FABP5	12.2677	11.5401	10.8305	11.4064	-0.647354	-1.22321	-0.133691	-0.709546	1.64166e-05	0.00210375	0.753501	4.65428e-06	0.000297264	0.821895	0.0308875	0.493634	0.662309	1.64592e-06	0.00121865	0.797619	4.72695e-07	8.99967e-05	0.853009	0.00653372	0.581574	0.723765	0.117677	0.443908	0.647619	0.0181399	0.152432	0.747222	0.708074	0.914472	0.514815	<	12.3701	39	24	3	27	0.928571	0.470588	0.590909	0.888889	0.677419	2.14497e-05	0
EXOC2	6.00131	6.35975	6.58636	6.21058	0.103849	0.479628	-0.149166	0.226614	0.00144723	0.0252017	0.703548	9.02971e-05	0.00226207	0.784314	0.398468	0.823166	0.595861	4.01066e-05	0.00446228	0.770503	1.87643e-06	0.000209563	0.84838	0.0631244	0.703599	0.666667	0.654016	0.860511	0.542857	0.173345	0.44481	0.630556	0.356599	0.752221	0.574074	>	5.99258	39	24	3	27	0.928571	0.470588	0.590909	0.888889	0.677419	2.14497e-05	0
PLXND1	6.70765	6.93112	6.55064	6.64357	-0.129809	-0.222735	-0.287553	-0.380479	0.0109763	0.0818407	0.655462	0.0141973	0.0690555	0.683007	0.165599	0.674836	0.618736	0.113543	0.365745	0.60119	0.0884429	0.259437	0.636574	0.483407	0.910991	0.554012	0.000797897	0.0876316	0.785714	0.00214185	0.0609809	0.794444	0.0107543	0.393563	0.774074	<	6.88024	39	24	3	27	0.928571	0.470588	0.590909	0.888889	0.677419	2.14497e-05	0
ZNF519	3.35933	3.27635	3.80073	3.58906	0.254137	0.465809	0.312715	0.524387	8.78555e-06	0.00148841	0.762838	4.69765e-06	0.00029813	0.769608	0.00156425	0.378067	0.753813	0.000350423	0.0147603	0.733466	0.000184516	0.00455954	0.746528	0.0127773	0.584174	0.716049	0.00158358	0.105676	0.833333	0.00116272	0.0496663	0.825	0.00321841	0.354125	0.844444	>	3.35681	33	34	9	17	0.785714	0.666667	0.66	0.790698	0.72043	2.15213e-05	0
S100A12	7.21043	5.99999	4.62566	5.95773	-0.896685	-2.22875	-0.042258	-1.37432	5.64526e-05	0.00381265	0.738562	4.35967e-06	0.000286691	0.830065	0.117881	0.623543	0.616558	1.21544e-05	0.00268835	0.753968	1.20553e-06	0.000158742	0.829861	0.0464001	0.677709	0.652778	0.0873204	0.397999	0.701587	0.000831121	0.044425	0.830556	0.94458	0.985806	0.52963	<	5.55181	33	34	9	17	0.785714	0.666667	0.66	0.790698	0.72043	2.15213e-05	0
IL1F9	7.21595	5.95854	4.10091	5.6827	-1.16342	-2.74521	-0.275834	-1.85763	2.55018e-05	0.00254903	0.760971	2.07398e-06	0.000174206	0.848039	0.0835895	0.586902	0.64488	4.26414e-06	0.00185314	0.793651	2.69047e-07	6.08183e-05	0.875	0.029392	0.64222	0.685185	0.0591599	0.340826	0.68254	0.00251265	0.0636323	0.783333	0.732855	0.922506	0.548148	<	6.75049	37	28	5	23	0.880952	0.54902	0.616667	0.848485	0.698925	2.3086e-05	0
ZNF643	3.31715	3.51289	4.51684	3.63065	0.25593	1.14213	0.117761	1.00396	0.000206973	0.00811295	0.741363	5.7376e-06	0.000343605	0.822712	0.128414	0.637002	0.632898	0.000415769	0.0161708	0.760582	2.07859e-05	0.00104668	0.83912	0.0560935	0.692287	0.655864	0.0752342	0.37342	0.695238	0.0169108	0.147746	0.783333	0.639344	0.886315	0.577778	>	3.20568	37	28	5	23	0.880952	0.54902	0.616667	0.848485	0.698925	2.3086e-05	0
GLO1	10.7827	10.9606	11.2467	11.1451	0.310039	0.411652	0.184518	0.286131	0.00120525	0.0224132	0.703548	0.00221697	0.0197679	0.736928	0.0540459	0.546085	0.659041	0.000488565	0.0178228	0.73545	0.000774853	0.012126	0.771991	0.0300245	0.64222	0.686728	0.1081	0.430912	0.626984	0.0711859	0.288686	0.652778	0.364037	0.756325	0.592593	>	10.7475	37	28	5	23	0.880952	0.54902	0.616667	0.848485	0.698925	2.3086e-05	0
UBE2T	8.54169	8.34498	9.10076	8.99779	0.513957	0.61693	0.652808	0.755781	2.82407e-05	0.00268838	0.757236	0.000198953	0.00377114	0.770425	0.00279161	0.387853	0.739651	0.000273972	0.0130404	0.746693	0.00083363	0.0127507	0.765046	0.00617361	0.581574	0.722222	0.000725453	0.0851422	0.78254	0.00223642	0.0609934	0.783333	0.0071074	0.377587	0.781481	>	8.70979	32	35	10	16	0.761905	0.686275	0.666667	0.777778	0.72043	2.36926e-05	0
CDC25A	4.99876	5.03627	5.47782	5.30928	0.299486	0.468033	0.273011	0.441559	0.000198389	0.00788469	0.710084	0.000373465	0.00583277	0.724673	0.0153379	0.447072	0.690632	0.000317597	0.0138324	0.714947	0.000488695	0.00874621	0.731481	0.00933982	0.581574	0.692901	0.026724	0.257682	0.698413	0.028505	0.18598	0.708333	0.112594	0.563006	0.685185	>	5.05189	32	35	10	16	0.761905	0.686275	0.666667	0.777778	0.72043	2.36926e-05	0
EHBP1L1	5.91683	5.79372	5.48105	5.74396	-0.136662	-0.399568	-0.0497642	-0.31267	0.000236479	0.0087871	0.73436	1.8155e-05	0.000743724	0.796569	0.17422	0.683713	0.651416	0.00028603	0.0132577	0.748016	3.50861e-05	0.00149236	0.806713	0.125107	0.74701	0.669753	0.046305	0.310112	0.701587	0.00242253	0.063253	0.772222	0.645855	0.889069	0.607407	<	5.77501	32	35	10	16	0.761905	0.686275	0.666667	0.777778	0.72043	2.36926e-05	0
CPZ	5.54422	5.72779	5.00846	5.34727	-0.25094	-0.589749	-0.380523	-0.719333	8.84142e-05	0.00499291	0.733427	1.01471e-05	0.000498407	0.810458	0.0923908	0.595357	0.630719	0.00125045	0.0309761	0.716931	0.000105084	0.00316375	0.799769	0.20426	0.803335	0.606481	0.000410246	0.0784806	0.773016	3.55776e-05	0.0143733	0.836111	0.0492862	0.488411	0.688889	<	5.42177	32	35	10	16	0.761905	0.686275	0.666667	0.777778	0.72043	2.36926e-05	0
ARID4B	5.1529	5.18644	5.36823	5.23646	0.0736978	0.205468	0.0500232	0.181794	7.79333e-05	0.00461656	0.742764	7.65974e-06	0.000411561	0.792484	0.0724864	0.569823	0.676471	0.000277314	0.0131311	0.746032	4.77905e-05	0.00188067	0.792824	0.0721917	0.703845	0.683642	0.0280061	0.262249	0.734921	0.0058737	0.0903944	0.791667	0.316751	0.729245	0.659259	>	5.19298	34	32	8	19	0.809524	0.627451	0.641509	0.8	0.709677	2.39019e-05	0
CCL22	5.8678	5.85903	5.46426	5.58774	-0.277477	-0.400966	-0.271284	-0.394773	0.00262543	0.0358504	0.711951	0.00432178	0.0311901	0.758987	0.0621777	0.557728	0.649237	0.0071779	0.0837397	0.707672	0.0101349	0.0655582	0.756944	0.0886063	0.721817	0.641975	0.028756	0.263555	0.722222	0.0242271	0.172542	0.763889	0.104693	0.55427	0.666667	<	5.84921	34	32	8	19	0.809524	0.627451	0.641509	0.8	0.709677	2.39019e-05	0
CCT7	10.4458	10.4902	10.7701	10.6516	0.192786	0.311271	0.161414	0.279899	0.00280629	0.0373256	0.690943	0.00329085	0.0257889	0.709967	0.0908009	0.592815	0.665577	0.00285205	0.0499259	0.698413	0.0028161	0.0280922	0.719907	0.0710144	0.703845	0.669753	0.0721889	0.366855	0.673016	0.0564472	0.258643	0.686111	0.287383	0.713232	0.655556	>	10.4728	34	32	8	19	0.809524	0.627451	0.641509	0.8	0.709677	2.39019e-05	0
HPDL	4.17045	4.12404	4.73941	4.51493	0.358131	0.582611	0.390889	0.615368	0.0102382	0.0788845	0.688609	0.0118333	0.0614281	0.70098	0.0912697	0.594001	0.672113	0.028583	0.175169	0.687169	0.0299513	0.129798	0.699074	0.140126	0.764972	0.671296	0.0714397	0.364726	0.692063	0.0689626	0.284254	0.705556	0.125618	0.576946	0.674074	>	4.01365	34	32	8	19	0.809524	0.627451	0.641509	0.8	0.709677	2.39019e-05	0
HIC1	4.35732	4.50371	4.22414	4.13666	-0.263721	-0.176238	-0.367053	-0.27957	0.0171264	0.106031	0.648926	0.12076	0.285458	0.623366	0.0340262	0.499425	0.683007	0.0800838	0.305519	0.597222	0.278943	0.512282	0.575231	0.0968052	0.734793	0.626543	0.00293027	0.122807	0.773016	0.0278088	0.184326	0.738889	0.00316475	0.354125	0.818519	<	4.37916	34	32	8	19	0.809524	0.627451	0.641509	0.8	0.709677	2.39019e-05	0
TGM2	5.89085	6.16372	5.6206	5.70413	-0.266974	-0.350505	-0.45959	-0.543121	0.00963075	0.0757986	0.64239	0.0198629	0.0869836	0.658497	0.127452	0.636495	0.620915	0.0646047	0.272644	0.591931	0.0796284	0.24256	0.605324	0.301725	0.846145	0.574074	0.000707612	0.084786	0.763492	0.00130102	0.0518102	0.786111	0.0212869	0.422286	0.733333	<	6.32498	41	19	1	32	0.97619	0.372549	0.561644	0.95	0.645161	2.43225e-05	0
GMNN	8.91359	9.10266	9.541	9.45139	0.482195	0.571802	0.348732	0.438339	4.68119e-05	0.00343157	0.736695	0.000300921	0.00503406	0.754085	0.00533457	0.410689	0.713508	1.16017e-05	0.00268835	0.77381	6.22142e-05	0.0022381	0.792824	0.00129687	0.581574	0.748457	0.0380123	0.288717	0.647619	0.0491655	0.242723	0.661111	0.144432	0.59817	0.62963	>	9.23943	31	36	11	15	0.738095	0.705882	0.673913	0.765957	0.72043	2.59741e-05	0
FETUB	3.75005	3.66666	3.13843	3.45294	-0.27259	-0.587099	-0.213723	-0.528232	0.00146205	0.0253714	0.733894	0.000790684	0.0097428	0.821895	0.162436	0.670814	0.616558	0.00185079	0.0384208	0.74537	0.000967303	0.0140498	0.832176	0.148041	0.772182	0.62963	0.0290382	0.264442	0.706349	0.00876612	0.107842	0.797222	0.335342	0.739925	0.585185	<	3.17061	31	36	11	15	0.738095	0.705882	0.673913	0.765957	0.72043	2.59741e-05	0
SRPR	8.95338	8.91774	8.70261	8.54598	-0.396916	-0.240287	-0.371762	-0.215132	0.000419453	0.0121432	0.727358	0.0170953	0.0788175	0.696078	0.000634472	0.378067	0.769063	0.000499751	0.018066	0.740741	0.0132748	0.0777333	0.710648	0.000465089	0.581574	0.780864	0.0327545	0.27326	0.695238	0.137483	0.400091	0.661111	0.0236658	0.431791	0.740741	<	8.79676	31	36	11	15	0.738095	0.705882	0.673913	0.765957	0.72043	2.59741e-05	0
LOC100131581	4.11169	4.11898	3.92055	3.97679	-0.137041	-0.193283	-0.142181	-0.198423	0.000201452	0.00794783	0.72549	0.000465608	0.00680905	0.764706	0.0213945	0.469558	0.673203	0.000442317	0.0167787	0.732804	0.000674387	0.0109518	0.773148	0.0228443	0.623881	0.679012	0.0106032	0.183529	0.707937	0.0124265	0.128002	0.744444	0.08645	0.533612	0.659259	<	4.02028	31	36	11	15	0.738095	0.705882	0.673913	0.765957	0.72043	2.59741e-05	0
CCDC84	6.93631	6.60173	6.55267	6.40832	-0.429585	-0.285238	-0.19341	-0.049063	0.00086701	0.0183024	0.699346	0.0226021	0.094867	0.647876	0.00102445	0.378067	0.767974	9.66127e-05	0.00733573	0.744709	0.00419186	0.0363739	0.693287	0.000110096	0.581574	0.813272	0.452473	0.750675	0.590476	0.771547	0.901086	0.538889	0.2092	0.652589	0.659259	<	6.73117	31	36	11	15	0.738095	0.705882	0.673913	0.765957	0.72043	2.59741e-05	0
METT5D1	4.17619	4.15137	4.30127	4.31082	0.141932	0.132381	0.159454	0.149903	0.00232515	0.0332014	0.69888	0.0128072	0.0647355	0.687092	0.00614556	0.410689	0.714597	0.0109455	0.105249	0.686508	0.036186	0.146436	0.672454	0.0175471	0.61726	0.705247	0.0302467	0.267673	0.728571	0.0657346	0.277716	0.722222	0.0259051	0.438128	0.737037	>	4.22462	31	36	11	15	0.738095	0.705882	0.673913	0.765957	0.72043	2.59741e-05	0
KERA	2.88501	2.84571	2.70783	2.7397	-0.133745	-0.165615	-0.106007	-0.137877	0.0049064	0.0512882	0.69141	0.0112869	0.0597619	0.728758	0.0833095	0.586902	0.641612	0.0054923	0.0726168	0.699074	0.0113694	0.0705124	0.734954	0.0806254	0.714354	0.651235	0.0647556	0.352445	0.673016	0.0559453	0.257874	0.713889	0.237062	0.675222	0.618519	<	2.75034	31	36	11	15	0.738095	0.705882	0.673913	0.765957	0.72043	2.59741e-05	0
KIF22	6.74866	6.59309	7.08421	6.91737	0.214467	0.381307	0.324279	0.491119	0.00398481	0.0451077	0.689542	0.00321978	0.0254112	0.736928	0.138124	0.644585	0.626362	0.021081	0.148752	0.664683	0.0124601	0.0746895	0.710648	0.259498	0.827446	0.603395	0.00550586	0.149956	0.749206	0.00345549	0.072638	0.8	0.0764914	0.52186	0.681481	>	6.88794	31	36	11	15	0.738095	0.705882	0.673913	0.765957	0.72043	2.59741e-05	0
MDM1	5.17048	5.2605	5.81235	5.70774	0.51078	0.61539	0.447235	0.551845	0.000128311	0.0061809	0.746965	6.83862e-05	0.00183751	0.79902	0.0129806	0.447072	0.67756	0.000451	0.0170112	0.758598	0.000194255	0.00471853	0.809028	0.0214237	0.620524	0.691358	0.0190116	0.23056	0.719048	0.00223142	0.0609934	0.775	0.117736	0.569565	0.644444	>	5.03663	40	22	2	29	0.952381	0.431373	0.57971	0.916667	0.666667	2.59895e-05	0
RNASEH2A	8.55451	8.45808	9.20255	8.88155	0.355407	0.676402	0.423477	0.744472	0.000152668	0.006749	0.723156	0.000187339	0.00362897	0.756536	0.0433563	0.520591	0.678649	0.000350714	0.0147603	0.728836	0.000294893	0.00621203	0.767361	0.0401556	0.668537	0.677469	0.0046895	0.144366	0.709524	0.00555241	0.0885014	0.730556	0.0743339	0.520309	0.681481	>	8.34828	40	22	2	29	0.952381	0.431373	0.57971	0.916667	0.666667	2.59895e-05	0
SCTR	4.00652	4.13017	3.86198	3.92649	-0.116389	-0.180899	-0.203675	-0.268185	0.000315192	0.0103126	0.704482	0.000815793	0.00995635	0.741013	0.0458373	0.525722	0.655773	0.0100168	0.100727	0.64881	0.0116418	0.0715656	0.690972	0.192012	0.793995	0.592593	5.96618e-06	0.037114	0.838095	3.04283e-05	0.0143733	0.861111	0.00105394	0.316797	0.807407	<	4.06989	40	22	2	29	0.952381	0.431373	0.57971	0.916667	0.666667	2.59895e-05	0
ATP10B	5.20975	5.15047	4.49516	4.82967	-0.362644	-0.697153	-0.320802	-0.655312	2.33213e-06	0.000863364	0.764706	1.22474e-06	0.000120019	0.834967	0.0163255	0.447072	0.671024	1.31788e-05	0.00268835	0.759921	7.09811e-06	0.000508596	0.829861	0.0218688	0.620524	0.666667	0.000630621	0.0820535	0.77619	8.65043e-05	0.0213495	0.847222	0.0483001	0.488411	0.681481	<	4.27496	12	51	30	0	0.285714	1	1	0.62963	0.677419	2.6545e-05	0
NLRX1	7.27486	6.89802	6.47434	6.88205	-0.281967	-0.689678	-0.0159629	-0.423673	3.37379e-06	0.000992762	0.761438	2.48562e-07	4.10119e-05	0.879902	0.0529316	0.545661	0.603486	3.64777e-07	0.00048615	0.808862	4.06991e-08	2.07913e-05	0.922454	0.0118687	0.583792	0.657407	0.0594732	0.341373	0.647619	0.00134703	0.0523901	0.777778	0.916265	0.97712	0.525926	<	6.38333	12	51	30	0	0.285714	1	1	0.62963	0.677419	2.6545e-05	0
SFRS13A	8.03822	8.04142	8.45033	8.16486	0.125702	0.411169	0.123446	0.408913	2.40359e-05	0.00246411	0.740896	4.53119e-07	5.88201e-05	0.835784	0.0800421	0.585982	0.614379	0.000216931	0.0114815	0.739418	8.35895e-06	0.000572273	0.833333	0.112514	0.738686	0.614198	0.00698586	0.165076	0.744444	0.000625316	0.0400425	0.841667	0.176668	0.626878	0.614815	>	8.50649	12	51	30	0	0.285714	1	1	0.62963	0.677419	2.6545e-05	0
WHSC1	6.06463	6.0679	6.65679	6.34966	0.284074	0.591198	0.281766	0.588889	1.14915e-05	0.00172726	0.736228	7.12812e-07	8.2369e-05	0.802288	0.0191341	0.467856	0.648148	8.04478e-05	0.00682275	0.736772	5.10869e-06	0.000413473	0.802083	0.0281273	0.639696	0.649691	0.00617497	0.158059	0.734921	0.00099473	0.0470424	0.802778	0.113416	0.564302	0.644444	>	6.81997	12	51	30	0	0.285714	1	1	0.62963	0.677419	2.6545e-05	0
IRAK1BP1	5.10012	5.1397	6.30349	5.27673	0.164972	1.19172	0.137039	1.16379	1.19434e-05	0.00176719	0.734827	8.29346e-09	4.59036e-06	0.874183	0.377432	0.815007	0.54902	5.2503e-05	0.0052248	0.740741	6.35313e-08	2.5566e-05	0.87963	0.355039	0.871881	0.555556	0.00451658	0.142191	0.720635	3.73001e-05	0.0143733	0.861111	0.53486	0.842053	0.533333	>	6.31001	12	51	30	0	0.285714	1	1	0.62963	0.677419	2.6545e-05	0
LGALS3	7.40509	7.47428	6.96065	7.28431	-0.14113	-0.46479	-0.189972	-0.513633	1.69295e-05	0.00212525	0.729692	2.29516e-07	4.0604e-05	0.827614	0.109528	0.612064	0.599129	0.000306029	0.0136173	0.710317	6.6011e-06	0.000485157	0.815972	0.206849	0.806909	0.569444	0.000878212	0.0898268	0.77619	3.12495e-05	0.0143733	0.855556	0.0840244	0.528639	0.67037	<	6.83516	12	51	30	0	0.285714	1	1	0.62963	0.677419	2.6545e-05	0
RPS6	10.6134	10.6325	10.7718	10.722	0.102975	0.152833	0.0894789	0.139336	7.30569e-05	0.00454642	0.725957	0.000115068	0.00264102	0.752451	0.0136037	0.447072	0.690632	0.00036754	0.0152438	0.716931	0.000548273	0.00944059	0.74537	0.0239447	0.626662	0.679012	0.0112863	0.188139	0.747619	0.00687591	0.0965283	0.769444	0.0748652	0.520918	0.718519	>	10.8742	12	51	30	0	0.285714	1	1	0.62963	0.677419	2.6545e-05	0
BCLAF1	7.11052	7.07528	7.45955	7.1921	0.0919509	0.359393	0.116821	0.384264	3.25267e-05	0.00287717	0.724556	4.28048e-07	5.71327e-05	0.804739	0.131976	0.638978	0.617647	0.00040697	0.0160134	0.709656	9.82002e-06	0.000625198	0.793981	0.211569	0.812111	0.597222	0.00371142	0.134411	0.760317	0.000329447	0.0330953	0.830556	0.139535	0.591013	0.666667	>	7.54203	12	51	30	0	0.285714	1	1	0.62963	0.677419	2.6545e-05	0
SUPT16H	8.17806	8.13498	8.76324	8.35778	0.192393	0.597851	0.222799	0.628257	0.000338191	0.0107828	0.697012	1.58564e-05	0.000681688	0.779412	0.135322	0.643611	0.587146	0.00224653	0.0433498	0.683201	0.000168024	0.00433415	0.766204	0.204766	0.804456	0.572531	0.0152281	0.212142	0.730159	0.00242706	0.063253	0.811111	0.200313	0.64608	0.622222	>	8.97775	12	51	30	0	0.285714	1	1	0.62963	0.677419	2.6545e-05	0
SMAD4	5.04321	5.04857	5.37275	5.16829	0.123499	0.327966	0.119722	0.324189	0.000164758	0.00702277	0.694211	2.07901e-05	0.000814932	0.737745	0.0536758	0.545781	0.636166	0.000840913	0.0248679	0.693783	0.000143983	0.00388969	0.734954	0.0689467	0.703845	0.638889	0.0227877	0.244142	0.695238	0.00771976	0.10133	0.744444	0.177727	0.627573	0.62963	>	5.41729	12	51	30	0	0.285714	1	1	0.62963	0.677419	2.6545e-05	0
SFRS2	10.3053	10.279	10.5438	10.4151	0.117506	0.246293	0.136094	0.264881	0.000390396	0.0118608	0.693744	0.000141906	0.00302758	0.750817	0.0575704	0.54935	0.617647	0.0019039	0.0389968	0.689815	0.000616676	0.0102819	0.75	0.0853777	0.717356	0.609568	0.0145656	0.208313	0.703175	0.00775712	0.101643	0.752778	0.12117	0.573482	0.637037	>	10.7052	12	51	30	0	0.285714	1	1	0.62963	0.677419	2.6545e-05	0
NOD2	6.11571	5.85433	5.39865	5.55879	-0.480042	-0.640188	-0.295539	-0.455686	0.000439917	0.0124278	0.69281	0.000600568	0.00809809	0.707516	0.0232444	0.472935	0.673203	0.000606061	0.0204003	0.702381	0.0008713	0.0130415	0.719907	0.0223996	0.620524	0.679012	0.0764229	0.374377	0.669841	0.0335949	0.201559	0.677778	0.22717	0.668241	0.659259	<	4.90654	12	51	30	0	0.285714	1	1	0.62963	0.677419	2.6545e-05	0
FYCO1	6.41146	6.40818	6.14879	6.29068	-0.119809	-0.261706	-0.117498	-0.259394	0.000780582	0.0171668	0.69141	0.000120066	0.00271828	0.747549	0.0762951	0.579476	0.616558	0.0030517	0.0517952	0.695106	0.000581695	0.00982981	0.747685	0.105717	0.736394	0.625	0.041017	0.297414	0.68254	0.0134413	0.132042	0.747222	0.237806	0.675577	0.596296	<	5.93697	12	51	30	0	0.285714	1	1	0.62963	0.677419	2.6545e-05	0
AUTS2	5.55747	5.61655	6.03651	5.57845	0.00359806	0.461661	-0.0381068	0.419956	0.00128514	0.023187	0.69141	1.9186e-07	3.7975e-05	0.832516	0.970154	0.99271	0.503268	0.00235488	0.0444133	0.704365	7.23865e-07	0.0001167	0.84375	0.840498	0.981492	0.518519	0.0872382	0.397889	0.660317	0.000680202	0.0418398	0.805556	0.784193	0.941363	0.533333	>	6.18183	12	51	30	0	0.285714	1	1	0.62963	0.677419	2.6545e-05	0
FANCF	7.18727	7.12319	7.82321	7.25141	0.0829847	0.65479	0.128218	0.700023	0.00066406	0.0156179	0.674136	1.01109e-06	0.000105826	0.830065	0.574216	0.893527	0.533769	0.00344215	0.0550056	0.659392	9.36103e-06	0.000611557	0.825231	0.686884	0.956715	0.561728	0.0132244	0.200504	0.709524	0.000105028	0.0243695	0.841667	0.525496	0.838781	0.533333	>	7.92119	12	51	30	0	0.285714	1	1	0.62963	0.677419	2.6545e-05	0
HOXC6	6.87029	7.39202	8.02786	7.36904	0.3453	1.00412	-0.0229857	0.635831	0.00246295	0.0345121	0.673203	0.000312822	0.00518974	0.742647	0.203646	0.711113	0.58061	0.00147795	0.0339216	0.696429	0.000282934	0.00605016	0.759259	0.101024	0.734793	0.612654	0.321486	0.657448	0.61746	0.0957239	0.334664	0.702778	0.945425	0.986	0.503704	>	8.63536	12	51	30	0	0.285714	1	1	0.62963	0.677419	2.6545e-05	0
TMEM111	6.52698	6.57628	6.37116	6.44343	-0.098051	-0.170322	-0.132855	-0.205127	0.00256601	0.03528	0.668534	0.000475783	0.00689417	0.73366	0.0983815	0.601393	0.581699	0.0144307	0.121981	0.64881	0.00243748	0.0256732	0.716435	0.190674	0.792467	0.558642	0.0229214	0.244759	0.715873	0.00644003	0.0940413	0.775	0.15925	0.613295	0.637037	<	6.2082	12	51	30	0	0.285714	1	1	0.62963	0.677419	2.6545e-05	0
ARNT2	5.44356	5.67614	6.58406	5.99275	0.480782	1.07209	0.316608	0.907917	0.000505367	0.0134346	0.660131	9.87944e-06	0.000490074	0.754902	0.0857496	0.586902	0.533769	0.000991679	0.0269357	0.68254	2.4329e-05	0.00116914	0.770833	0.0788449	0.711094	0.564815	0.0945169	0.41084	0.606349	0.014624	0.13777	0.716667	0.478254	0.81632	0.540741	>	7.31561	12	51	30	0	0.285714	1	1	0.62963	0.677419	2.6545e-05	0
TCF4	8.53315	8.5189	8.85881	8.87471	0.345748	0.329847	0.355805	0.339905	0.00417457	0.0466223	0.660131	0.0212192	0.0910126	0.639706	0.0117106	0.442459	0.687364	0.0114164	0.107908	0.65873	0.0400312	0.156093	0.636574	0.0198382	0.620524	0.688272	0.0520329	0.323542	0.663492	0.105384	0.350869	0.647222	0.0396403	0.476518	0.685185	>	9.22351	12	51	30	0	0.285714	1	1	0.62963	0.677419	2.6545e-05	0
FGF3	4.1871	4.28195	5.78057	4.80363	0.588633	1.56557	0.52168	1.49862	8.22985e-05	0.00474129	0.644258	2.41882e-06	0.000193419	0.660948	0.00793156	0.425064	0.622004	0.000657928	0.0214212	0.687831	4.94368e-05	0.00192613	0.700231	0.0190688	0.620524	0.671296	0.0391319	0.292127	0.539683	0.0111408	0.121638	0.566667	0.191687	0.639774	0.503704	>	4.84841	12	51	30	0	0.285714	1	1	0.62963	0.677419	2.6545e-05	0
REEP5	9.58498	9.65458	9.31317	9.50191	-0.103537	-0.292279	-0.152664	-0.341406	0.00537501	0.0540502	0.641923	0.00166217	0.0163124	0.691993	0.18446	0.692275	0.575163	0.026527	0.168655	0.623677	0.00924027	0.0616243	0.678241	0.321881	0.855663	0.550926	0.033292	0.274457	0.685714	0.019176	0.156111	0.725	0.134662	0.587515	0.633333	<	9.09809	12	51	30	0	0.285714	1	1	0.62963	0.677419	2.6545e-05	0
TMX3	5.48951	5.5575	5.72009	5.7526	0.243098	0.210589	0.195107	0.162598	0.00200971	0.0305522	0.637255	0.00886964	0.0509373	0.622549	0.00992067	0.427184	0.656863	0.00329255	0.0538636	0.656085	0.0109494	0.0688598	0.641204	0.0133667	0.587968	0.675926	0.101416	0.420625	0.592063	0.127094	0.384147	0.577778	0.12276	0.574222	0.611111	>	5.99478	12	51	30	0	0.285714	1	1	0.62963	0.677419	2.6545e-05	0
HNRNPH3	8.62442	8.61012	9.03295	8.56848	-0.0517375	0.412737	-0.0416394	0.422835	0.00742975	0.065402	0.625117	4.90701e-06	0.00030945	0.776144	0.518679	0.875733	0.576253	0.022264	0.153133	0.619709	6.03512e-05	0.00218565	0.771991	0.525982	0.922765	0.583333	0.0877553	0.399162	0.638095	0.00222069	0.0609934	0.786111	0.70589	0.913963	0.559259	>	9.08286	12	51	30	0	0.285714	1	1	0.62963	0.677419	2.6545e-05	0
MAP3K6	5.08086	5.01244	4.92981	4.85333	-0.207407	-0.130929	-0.159116	-0.0826382	0.0187027	0.111441	0.621382	0.102337	0.25544	0.597222	0.00917955	0.427184	0.653595	0.0215301	0.150597	0.632937	0.0970248	0.274473	0.607639	0.0103866	0.581574	0.666667	0.299232	0.638476	0.593651	0.499758	0.738917	0.572222	0.14771	0.599664	0.622222	<	4.56115	12	51	30	0	0.285714	1	1	0.62963	0.677419	2.6545e-05	0
ADAMTS18	3.55637	3.55352	4.10492	3.63816	0.0826217	0.54938	0.0846329	0.551391	0.000353046	0.0110105	0.611578	2.2706e-06	0.000184518	0.693627	0.222101	0.722802	0.502179	0.00242843	0.0450759	0.613095	5.48822e-05	0.00205075	0.694444	0.292004	0.842191	0.50463	0.042015	0.299326	0.607937	0.00617798	0.0920984	0.691667	0.435733	0.793	0.503704	>	3.97133	12	51	30	0	0.285714	1	1	0.62963	0.677419	2.6545e-05	0
ANXA2	10.5951	10.5091	10.259	10.6443	0.0744929	-0.310861	0.135189	-0.250165	0.0506304	0.199912	0.598973	0.000196125	0.00373404	0.74183	0.373285	0.812603	0.591503	0.0413383	0.21503	0.62037	0.000238017	0.00540704	0.763889	0.578415	0.932383	0.570988	0.479884	0.766249	0.547619	0.0424386	0.225216	0.688889	0.258881	0.693964	0.640741	<	10.1132	12	51	30	0	0.285714	1	1	0.62963	0.677419	2.6545e-05	0
TBR1	2.59116	2.63824	2.56109	2.57203	-0.0329723	-0.0439167	-0.0662093	-0.0771537	0.182087	0.414837	0.589636	0.163703	0.345902	0.596405	0.412896	0.831072	0.58061	0.436051	0.706066	0.560847	0.370545	0.602487	0.565972	0.662889	0.952635	0.554012	0.122989	0.451382	0.65873	0.09269	0.329548	0.669444	0.281232	0.708755	0.644444	<	2.44177	12	51	30	0	0.285714	1	1	0.62963	0.677419	2.6545e-05	0
ULK4	3.59716	3.61234	3.72233	3.62497	0.0233495	0.120709	0.0126334	0.109993	0.042112	0.179773	0.587302	0.00712753	0.0435605	0.659314	0.569173	0.891972	0.508715	0.0630837	0.268601	0.590608	0.0147317	0.0831928	0.659722	0.543756	0.925644	0.501543	0.298969	0.638362	0.579365	0.133743	0.395155	0.658333	0.840416	0.958336	0.525926	>	3.84623	12	51	30	0	0.285714	1	1	0.62963	0.677419	2.6545e-05	0
SFXN4	6.56549	6.55962	6.47577	6.64824	0.0844768	-0.0879981	0.0886242	-0.0838507	0.843419	0.923645	0.539216	0.282027	0.484116	0.618464	0.310579	0.774899	0.566449	0.845583	0.936046	0.539021	0.32779	0.56121	0.618056	0.36642	0.875603	0.566358	0.930337	0.976283	0.539683	0.494134	0.734932	0.619444	0.442278	0.7974	0.566667	<	6.22592	12	51	30	0	0.285714	1	1	0.62963	0.677419	2.6545e-05	0
DMD	3.65	3.69052	3.93554	3.57754	-0.0843755	0.273623	-0.112975	0.245023	0.27593	0.522953	0.530812	0.0264485	0.105472	0.540033	0.441354	0.845417	0.625272	0.308744	0.599206	0.517196	0.0477819	0.175363	0.552083	0.567395	0.929913	0.609568	0.627162	0.846945	0.563492	0.225896	0.506094	0.511111	0.496571	0.825486	0.662963	>	4.30923	12	51	30	0	0.285714	1	1	0.62963	0.677419	2.6545e-05	0
ORC1L	5.02799	5.04323	5.78783	5.64209	0.609612	0.755354	0.59885	0.744593	6.72805e-06	0.00128355	0.747899	8.80937e-05	0.00222078	0.723856	0.00065988	0.378067	0.779956	4.01786e-05	0.00446228	0.753968	0.000324276	0.00664436	0.725694	0.00107257	0.581574	0.791667	0.00241647	0.115342	0.733333	0.00693503	0.0969988	0.719444	0.00505363	0.36884	0.751852	>	5.29331	30	37	12	14	0.714286	0.72549	0.681818	0.755102	0.72043	2.82404e-05	0
BMP1	5.63244	5.64025	5.35597	5.49765	-0.137089	-0.278768	-0.142604	-0.284284	3.83746e-05	0.00318287	0.74043	2.25245e-05	0.000852026	0.786765	0.0239693	0.478659	0.678649	0.000156016	0.00988594	0.74537	7.65516e-05	0.0025336	0.792824	0.0259085	0.632402	0.682099	0.0064556	0.159003	0.728571	0.00419416	0.0786547	0.772222	0.0831145	0.526471	0.67037	<	5.49373	30	37	12	14	0.714286	0.72549	0.681818	0.755102	0.72043	2.82404e-05	0
RPL10A	10.1135	10.1598	10.2793	10.2269	0.0998252	0.152247	0.0671498	0.119572	0.000245903	0.00898693	0.719888	0.000367541	0.00578545	0.745915	0.02109	0.469558	0.685185	0.000324052	0.0139615	0.737434	0.000499788	0.00888112	0.761574	0.0162883	0.608634	0.705247	0.0643697	0.352017	0.677778	0.0474247	0.237901	0.708333	0.23217	0.671423	0.637037	>	10.1875	30	37	12	14	0.714286	0.72549	0.681818	0.755102	0.72043	2.82404e-05	0
FUBP1	6.28956	6.36349	6.77582	6.48115	0.169847	0.464517	0.117666	0.412335	0.000325305	0.0105196	0.701681	2.88409e-05	0.00101588	0.755719	0.0705736	0.569516	0.62963	0.000921054	0.0259335	0.71627	0.000131963	0.00370516	0.771991	0.0663763	0.703845	0.641975	0.0623175	0.346823	0.666667	0.0177554	0.150593	0.716667	0.369892	0.759503	0.6	>	6.40985	30	37	12	14	0.714286	0.72549	0.681818	0.755102	0.72043	2.82404e-05	0
RANBP1	7.08839	7.12692	7.28783	7.33753	0.237812	0.188115	0.210612	0.160915	0.0098513	0.0768523	0.698413	0.059934	0.181249	0.678105	0.0286164	0.489406	0.72549	0.015943	0.128897	0.712302	0.0751669	0.233296	0.69213	0.0390803	0.667686	0.739198	0.0733603	0.369509	0.665079	0.163977	0.432425	0.644444	0.0592293	0.499611	0.692593	>	7.19873	30	37	12	14	0.714286	0.72549	0.681818	0.755102	0.72043	2.82404e-05	0
CDC5L	7.91811	7.86277	8.28883	8.04493	0.143095	0.386998	0.182155	0.426058	0.000762332	0.0169519	0.727824	0.000136689	0.00295092	0.786765	0.180102	0.688679	0.649237	0.00511193	0.0694715	0.715608	0.00112422	0.0156072	0.770833	0.287963	0.839532	0.641975	0.00418136	0.139305	0.757143	0.000511091	0.0377019	0.825	0.116683	0.56762	0.666667	>	7.87757	37	27	5	24	0.880952	0.529412	0.606557	0.84375	0.688172	2.90905e-05	0
TIE1	4.18387	4.32022	3.93901	4.12339	-0.100575	-0.284962	-0.196821	-0.381208	0.00376997	0.0438171	0.666667	0.00129024	0.0136761	0.728758	0.299332	0.768416	0.583878	0.0298767	0.179731	0.628307	0.00895904	0.0604659	0.685185	0.554459	0.92755	0.552469	0.00079997	0.0876316	0.75873	0.000235244	0.0288513	0.833333	0.0609845	0.501105	0.659259	<	4.24674	37	27	5	24	0.880952	0.529412	0.606557	0.84375	0.688172	2.90905e-05	0
ZC3H12A	7.81907	7.75661	6.5042	7.15126	-0.649443	-1.2965	-0.60535	-1.25241	1.00309e-06	0.000612293	0.776377	1.72086e-07	3.62124e-05	0.841503	0.0122418	0.443067	0.689542	2.433e-06	0.00149789	0.791005	2.23154e-07	5.44034e-05	0.855324	0.0097821	0.581574	0.705247	0.00176454	0.108232	0.74127	0.000333507	0.0333357	0.808333	0.0926917	0.539813	0.651852	<	6.66018	22	45	20	6	0.52381	0.882353	0.785714	0.692308	0.72043	2.92736e-05	0
TRIM29	8.67075	8.19104	7.58552	8.16554	-0.364115	-0.944141	-0.0254961	-0.605521	2.24676e-05	0.00236517	0.755369	4.92247e-06	0.00030945	0.812092	0.0133351	0.447072	0.679739	5.24789e-06	0.00201048	0.81746	2.29503e-06	0.000244042	0.869213	0.000306628	0.581574	0.748457	0.172415	0.51444	0.606349	0.0596011	0.266365	0.675	0.889339	0.971392	0.514815	<	7.95808	22	45	20	6	0.52381	0.882353	0.785714	0.692308	0.72043	2.92736e-05	0
GPR115	4.64714	4.23263	3.56202	3.99177	-0.533456	-0.963203	-0.240864	-0.67061	3.97383e-05	0.00321253	0.754902	3.87927e-05	0.00123292	0.822712	0.0274798	0.487395	0.664488	7.69851e-06	0.00245534	0.791005	8.61223e-06	0.000580167	0.849537	0.00677668	0.581574	0.712963	0.0631654	0.348797	0.668254	0.0279602	0.184616	0.758333	0.416819	0.784543	0.548148	<	3.49535	22	45	20	6	0.52381	0.882353	0.785714	0.692308	0.72043	2.92736e-05	0
SH3BGRL3	10.3094	10.3849	9.79105	10.0224	-0.309212	-0.540531	-0.362514	-0.593834	2.19887e-05	0.0023475	0.744631	1.75805e-05	0.000732193	0.784314	0.0165348	0.450544	0.691721	0.000411863	0.0161126	0.727513	0.00028332	0.00605112	0.765046	0.0489978	0.677709	0.677469	0.00045451	0.0797171	0.785714	0.000155915	0.025387	0.830556	0.0102338	0.393563	0.725926	<	9.93856	22	45	20	6	0.52381	0.882353	0.785714	0.692308	0.72043	2.92736e-05	0
DHX15	10.0257	10.1058	10.5223	10.1594	0.110109	0.473	0.0535747	0.416466	2.10453e-05	0.00231339	0.743697	6.50594e-09	4.019e-06	0.861928	0.217375	0.720071	0.586057	4.64261e-05	0.0048861	0.757275	2.00819e-08	1.43377e-05	0.876157	0.166257	0.783692	0.598765	0.0237297	0.24714	0.711111	0.000164853	0.0257467	0.827778	0.67625	0.902541	0.555556	>	10.4003	22	45	20	6	0.52381	0.882353	0.785714	0.692308	0.72043	2.92736e-05	0
PAMR1	6.57699	6.57076	5.81131	6.2312	-0.343961	-0.763846	-0.339558	-0.759442	0.000158093	0.0068705	0.739029	1.7315e-05	0.000727195	0.819444	0.105948	0.611026	0.631808	0.000460769	0.0171873	0.744048	3.78752e-05	0.00157742	0.828704	0.126564	0.748782	0.631173	0.00637343	0.158731	0.726984	0.000300103	0.0315756	0.797222	0.21803	0.659002	0.633333	<	5.80846	22	45	20	6	0.52381	0.882353	0.785714	0.692308	0.72043	2.92736e-05	0
CENPV	5.25997	5.43079	6.27793	5.53414	0.223935	0.967719	0.103353	0.847137	0.000101385	0.00537608	0.727358	2.67543e-07	4.14609e-05	0.837418	0.278497	0.758272	0.58061	0.000221185	0.0115149	0.739418	1.09211e-06	0.000147516	0.844907	0.230773	0.81365	0.598765	0.0276327	0.261613	0.698413	0.000223347	0.0284391	0.819444	0.694094	0.909103	0.537037	>	6.11099	22	45	20	6	0.52381	0.882353	0.785714	0.692308	0.72043	2.92736e-05	0
MAL	5.77443	5.77983	5.12703	5.22701	-0.549008	-0.648989	-0.552815	-0.652796	0.00379266	0.0439531	0.720822	0.00779281	0.0462823	0.71732	0.0490223	0.534865	0.72549	0.00966831	0.098679	0.705026	0.0154197	0.0860736	0.704861	0.0732691	0.707254	0.705247	0.0367839	0.2851	0.75873	0.0319244	0.196309	0.747222	0.111733	0.562917	0.774074	<	4.91827	22	45	20	6	0.52381	0.882353	0.785714	0.692308	0.72043	2.92736e-05	0
PROS1	8.31724	8.18527	7.43012	7.89683	-0.381603	-0.84831	-0.288445	-0.755153	0.000712181	0.0163084	0.719888	0.000218231	0.00403202	0.763072	0.107383	0.611101	0.662309	0.000870542	0.0252383	0.728175	0.000236559	0.00538005	0.770833	0.0814949	0.71486	0.671296	0.0531423	0.326423	0.7	0.0197036	0.157222	0.744444	0.36455	0.756325	0.640741	<	7.61781	22	45	20	6	0.52381	0.882353	0.785714	0.692308	0.72043	2.92736e-05	0
CASP6	7.38963	7.49072	8.00489	7.64002	0.220662	0.585527	0.149306	0.514171	5.08914e-05	0.00357145	0.712885	3.97102e-06	0.00026717	0.79085	0.0715596	0.569823	0.608932	0.000159944	0.00996637	0.717593	2.05933e-05	0.00104111	0.792824	0.0680492	0.703845	0.617284	0.0184371	0.228362	0.701587	0.00212121	0.0609809	0.786111	0.289324	0.715164	0.588889	>	7.80244	22	45	20	6	0.52381	0.882353	0.785714	0.692308	0.72043	2.92736e-05	0
CAV1	9.83346	9.78062	8.92278	9.51201	-0.305906	-0.895141	-0.26861	-0.857844	0.00042095	0.0121432	0.704949	3.91296e-05	0.00124165	0.776961	0.159212	0.667956	0.608932	0.000942305	0.0262362	0.712302	8.99709e-05	0.00279721	0.784722	0.152069	0.773804	0.615741	0.0283509	0.263083	0.687302	0.00562689	0.089117	0.758333	0.352628	0.749234	0.592593	<	9.09367	22	45	20	6	0.52381	0.882353	0.785714	0.692308	0.72043	2.92736e-05	0
CDX4	4.31984	4.33093	4.18369	4.17531	-0.147792	-0.139408	-0.155623	-0.147239	0.00113021	0.0215782	0.698413	0.00985995	0.0546033	0.685458	0.00509767	0.410689	0.715686	0.00440618	0.0642948	0.686508	0.0231055	0.110256	0.677083	0.010898	0.581574	0.699074	0.0216044	0.238538	0.726984	0.0601662	0.267701	0.705556	0.0190434	0.416061	0.755556	<	4.16329	22	45	20	6	0.52381	0.882353	0.785714	0.692308	0.72043	2.92736e-05	0
MIA	5.72406	5.69806	6.73405	5.72451	0.00809305	1.01764	0.0264495	1.036	0.000655243	0.0156126	0.697946	1.7491e-06	0.000152691	0.824346	0.91705	0.983288	0.529412	0.00430591	0.0634336	0.700397	5.23745e-05	0.00199813	0.821759	0.995921	0.999412	0.53858	0.0467687	0.311651	0.692063	0.00500964	0.085386	0.830556	0.767718	0.934901	0.507407	>	5.933	22	45	20	6	0.52381	0.882353	0.785714	0.692308	0.72043	2.92736e-05	0
TBRG1	5.55817	5.51811	5.3115	5.37278	-0.17361	-0.234882	-0.145335	-0.206607	2.97455e-05	0.00276578	0.736695	0.000136079	0.00294898	0.744281	0.00275183	0.387853	0.72658	7.05018e-05	0.00634866	0.751984	0.000269069	0.00587535	0.756944	0.00241654	0.581574	0.74537	0.0170161	0.222478	0.7	0.0227157	0.167804	0.713889	0.0529472	0.492587	0.681481	<	5.43169	29	38	13	13	0.690476	0.745098	0.690476	0.745098	0.72043	3.03095e-05	0
CREB3L4	6.56854	6.32716	7.25418	6.6151	0.11756	0.756636	0.287948	0.927023	0.000181651	0.00744135	0.729692	9.27909e-07	0.000100614	0.84232	0.454076	0.849787	0.579521	0.00288428	0.0501825	0.704365	1.84996e-05	0.000965379	0.822917	0.772443	0.974081	0.546296	0.000512611	0.0797171	0.790476	6.88902e-06	0.0116132	0.888889	0.131401	0.58453	0.659259	>	6.80704	29	38	13	13	0.690476	0.745098	0.690476	0.745098	0.72043	3.03095e-05	0
APOA1	4.25912	4.22867	4.13013	4.10557	-0.144599	-0.120038	-0.123106	-0.0985455	0.000252562	0.0091242	0.721289	0.00504561	0.0346316	0.712418	0.00311962	0.387853	0.733115	0.000504846	0.0181845	0.721561	0.00677101	0.0504132	0.710648	0.00469565	0.581574	0.736111	0.0200379	0.232488	0.720635	0.0562574	0.258483	0.716667	0.0327693	0.459069	0.725926	<	4.15244	29	38	13	13	0.690476	0.745098	0.690476	0.745098	0.72043	3.03095e-05	0
C16orf59	6.09925	6.05075	6.3045	6.35274	0.267762	0.219519	0.301993	0.25375	0.00144656	0.0252017	0.719421	0.0139918	0.0683387	0.694444	0.00703107	0.425064	0.752723	0.00319525	0.0530975	0.703042	0.0183347	0.0958245	0.675926	0.00751687	0.581574	0.739198	0.0201743	0.233394	0.75873	0.0596038	0.266365	0.738889	0.0394236	0.476442	0.785185	>	6.23761	29	38	13	13	0.690476	0.745098	0.690476	0.745098	0.72043	3.03095e-05	0
ALX3	4.45047	4.41965	4.7172	4.5317	0.090295	0.275791	0.112047	0.297542	0.000626202	0.0152368	0.712885	0.000102827	0.00246772	0.763072	0.136627	0.644386	0.645969	0.00393299	0.0596712	0.71164	0.000819628	0.012604	0.762731	0.214848	0.812698	0.643519	0.0144584	0.208313	0.715873	0.00530642	0.0863849	0.763889	0.131078	0.58453	0.651852	>	4.49216	29	38	13	13	0.690476	0.745098	0.690476	0.745098	0.72043	3.03095e-05	0
WDR36	5.86824	5.88168	6.15671	6.04255	0.170355	0.284513	0.160871	0.275029	0.00266976	0.0362085	0.708683	0.00395414	0.0293311	0.732026	0.0505022	0.53753	0.67756	0.00558225	0.0730332	0.705026	0.0075437	0.0540413	0.731481	0.0504899	0.68469	0.669753	0.0613397	0.344889	0.71746	0.0651874	0.276639	0.733333	0.141308	0.593837	0.696296	>	5.99042	29	38	13	13	0.690476	0.745098	0.690476	0.745098	0.72043	3.03095e-05	0
C3orf17	7.20824	7.29494	7.67135	7.32204	0.0883072	0.43761	0.0271028	0.376406	0.00416858	0.0465814	0.705882	0.00022667	0.00412941	0.793301	0.511441	0.87279	0.589325	0.00465476	0.0659018	0.707011	0.000293629	0.00619192	0.788194	0.431257	0.898167	0.598765	0.091403	0.405476	0.703175	0.00596164	0.0907666	0.805556	0.865709	0.964787	0.566667	>	7.43701	29	38	13	13	0.690476	0.745098	0.690476	0.745098	0.72043	3.03095e-05	0
SOX17	3.88094	3.89785	3.68531	3.75195	-0.133959	-0.200603	-0.145899	-0.212543	0.00727549	0.06447	0.702614	0.00705622	0.04339	0.718954	0.112737	0.616683	0.680828	0.0161059	0.129671	0.699074	0.0124136	0.0745448	0.71875	0.145286	0.768767	0.67284	0.0554142	0.333169	0.711111	0.0393811	0.21777	0.719444	0.210787	0.654322	0.7	<	3.72093	29	38	13	13	0.690476	0.745098	0.690476	0.745098	0.72043	3.03095e-05	0
HNRNPUL2	5.31938	5.26121	5.55675	5.42774	0.125471	0.254474	0.166535	0.295538	0.000616281	0.0150917	0.679739	0.000142112	0.00302874	0.743464	0.0620349	0.557728	0.594771	0.00545813	0.0723085	0.65873	0.00134628	0.017431	0.724537	0.139783	0.764923	0.570988	0.0101759	0.182176	0.730159	0.00378684	0.0752231	0.788889	0.0860046	0.532859	0.651852	>	5.42165	29	38	13	13	0.690476	0.745098	0.690476	0.745098	0.72043	3.03095e-05	0
PPP3R1	6.30508	6.26977	6.51914	6.57313	0.278431	0.224444	0.303354	0.249367	0.0231557	0.126339	0.672736	0.0897358	0.234144	0.656046	0.0443391	0.522981	0.694989	0.0630521	0.268529	0.664021	0.166283	0.380338	0.649306	0.0963362	0.733894	0.683642	0.0551838	0.332183	0.693651	0.11172	0.362118	0.672222	0.0255152	0.436634	0.722222	>	6.3645	29	38	13	13	0.690476	0.745098	0.690476	0.745098	0.72043	3.03095e-05	0
C10orf53	4.3157	4.29551	4.12856	4.23432	-0.0754404	-0.181204	-0.0611866	-0.16695	0.000118538	0.005954	0.718021	2.00337e-05	0.000796749	0.799837	0.0848857	0.586902	0.608932	0.000291888	0.0133833	0.724868	5.51212e-05	0.00205584	0.814815	0.082675	0.715965	0.604938	0.0197358	0.232241	0.701587	0.00462476	0.0819623	0.763889	0.289112	0.715046	0.618519	<	4.10832	18	48	24	3	0.428571	0.941176	0.857143	0.666667	0.709677	3.06506e-05	0
CDSN	4.74515	4.5609	4.19389	4.5022	-0.188756	-0.49707	-0.0586974	-0.367012	0.00924645	0.0740272	0.694211	0.00351658	0.0270593	0.795752	0.331729	0.787506	0.558824	0.00871615	0.093179	0.695106	0.00418204	0.0363176	0.793981	0.268034	0.830089	0.563272	0.141969	0.476432	0.692063	0.0226663	0.167744	0.8	0.756571	0.931915	0.548148	<	4.09677	18	48	24	3	0.428571	0.941176	0.857143	0.666667	0.709677	3.06506e-05	0
HAUS1	8.21192	8.07288	8.92808	8.5239	0.352874	0.757054	0.451021	0.8552	4.76106e-06	0.00114199	0.761438	4.38313e-07	5.77874e-05	0.809641	0.0131812	0.447072	0.697168	0.000124649	0.00850467	0.752646	1.12837e-05	0.000698367	0.80787	0.0387385	0.667565	0.679012	0.000755084	0.0858919	0.78254	0.000161218	0.0257024	0.813889	0.0241618	0.432556	0.740741	>	8.87292	18	48	24	3	0.428571	0.941176	0.857143	0.666667	0.709677	3.06506e-05	0
FANCL	7.91967	7.77225	8.70027	8.18329	0.30698	0.823953	0.411047	0.92802	7.21722e-06	0.00133592	0.754435	3.20163e-07	4.63795e-05	0.829248	0.0505237	0.53753	0.654684	0.000149196	0.00968367	0.736772	7.01901e-06	0.000508575	0.81713	0.111232	0.737742	0.62963	0.000410366	0.0784806	0.796825	3.73874e-05	0.0143733	0.858333	0.0380471	0.473103	0.714815	>	8.66279	18	48	24	3	0.428571	0.941176	0.857143	0.666667	0.709677	3.06506e-05	0
SFRS13B	3.7318	3.87005	4.37882	4.05946	0.286995	0.606356	0.189409	0.50877	4.55475e-05	0.00338952	0.722222	6.28077e-06	0.000364537	0.790033	0.0249996	0.480692	0.631808	8.66951e-05	0.00701669	0.740741	1.43757e-05	0.000821101	0.806713	0.0174001	0.617093	0.652778	0.0405299	0.296029	0.677778	0.0110889	0.121336	0.75	0.291701	0.715947	0.581481	>	4.43536	18	48	24	3	0.428571	0.941176	0.857143	0.666667	0.709677	3.06506e-05	0
SCNM1	8.74133	8.64296	8.94729	8.93492	0.22253	0.234893	0.291966	0.304329	0.000182925	0.00746297	0.712418	0.00113004	0.0124672	0.71732	0.00356902	0.396974	0.705882	0.003159	0.0526702	0.687831	0.00893903	0.0604122	0.69213	0.0185351	0.618488	0.682099	0.00126671	0.0993051	0.771429	0.0031112	0.069727	0.777778	0.00429583	0.36884	0.762963	>	9.0213	18	48	24	3	0.428571	0.941176	0.857143	0.666667	0.709677	3.06506e-05	0
MND1	5.64359	5.42521	6.37912	6.10812	0.528761	0.799761	0.682906	0.953907	0.000166895	0.00708364	0.708683	0.00027022	0.00468921	0.757353	0.023171	0.472935	0.643791	0.000971297	0.026672	0.703704	0.00085039	0.0128984	0.755787	0.0410266	0.668537	0.634259	0.0022919	0.115019	0.720635	0.0027007	0.0652638	0.761111	0.0345439	0.464091	0.666667	>	6.59712	18	48	24	3	0.428571	0.941176	0.857143	0.666667	0.709677	3.06506e-05	0
THRAP3	5.51068	5.52655	5.68038	5.58222	0.0668745	0.165037	0.055674	0.153837	0.000549952	0.0141494	0.700747	0.000121382	0.00273567	0.742647	0.0917423	0.594749	0.64488	0.00172094	0.0369749	0.703704	0.000499623	0.00888112	0.743056	0.103583	0.73508	0.651235	0.0448775	0.3065	0.693651	0.0170376	0.147984	0.741667	0.294381	0.717425	0.62963	>	5.68806	18	48	24	3	0.428571	0.941176	0.857143	0.666667	0.709677	3.06506e-05	0
CAPRIN1	7.3866	7.3182	7.7803	7.49203	0.125549	0.41382	0.173836	0.462108	0.000296112	0.0098812	0.699813	1.79749e-05	0.000742429	0.785131	0.162187	0.670814	0.586057	0.00211754	0.0418712	0.68254	0.000145934	0.00393177	0.777778	0.253287	0.821953	0.555556	0.00744519	0.168609	0.74127	0.0015071	0.0553832	0.802778	0.155026	0.608147	0.659259	>	7.80947	18	48	24	3	0.428571	0.941176	0.857143	0.666667	0.709677	3.06506e-05	0
HNRNPK	11.502	11.4768	11.665	11.531	0.0363391	0.17034	0.0541499	0.188151	0.00166504	0.0273058	0.688142	3.1037e-05	0.001057	0.785131	0.426666	0.837702	0.558824	0.00956447	0.098265	0.667328	0.000339314	0.00680364	0.763889	0.571735	0.931125	0.53858	0.0143832	0.208313	0.738095	0.000529466	0.0379947	0.836111	0.373166	0.76232	0.607407	>	11.6791	18	48	24	3	0.428571	0.941176	0.857143	0.666667	0.709677	3.06506e-05	0
GGT7	5.52763	5.54359	5.80684	5.61763	0.085304	0.274514	0.0740374	0.263247	0.00154279	0.0261152	0.68254	5.34768e-05	0.001537	0.756536	0.222653	0.723044	0.583878	0.00444032	0.0643731	0.689815	0.000238508	0.00541205	0.766204	0.244675	0.818321	0.587963	0.0673822	0.357209	0.665079	0.0111148	0.121551	0.733333	0.478939	0.816335	0.574074	>	5.81863	18	48	24	3	0.428571	0.941176	0.857143	0.666667	0.709677	3.06506e-05	0
ZNF518B	5.159	5.14668	5.70688	5.20819	0.0528149	0.5515	0.0615157	0.560201	0.000838506	0.0179471	0.664332	3.03098e-07	4.55148e-05	0.823529	0.663333	0.918717	0.54793	0.00401523	0.0604439	0.662037	5.73237e-06	0.000439064	0.813657	0.720191	0.964155	0.540123	0.0272455	0.260619	0.669841	9.72145e-05	0.0228637	0.847222	0.716242	0.918258	0.566667	>	5.62761	18	48	24	3	0.428571	0.941176	0.857143	0.666667	0.709677	3.06506e-05	0
SLC39A10	7.98643	7.92289	8.49856	8.07501	0.107274	0.530821	0.15213	0.575677	0.00222282	0.0324827	0.663399	9.92552e-05	0.00242272	0.734477	0.373439	0.812603	0.568627	0.00961797	0.0984244	0.659392	0.000636857	0.0105131	0.730324	0.483366	0.910991	0.564815	0.0327568	0.27326	0.673016	0.0065036	0.0945998	0.744444	0.358002	0.752556	0.577778	>	8.46945	18	48	24	3	0.428571	0.941176	0.857143	0.666667	0.709677	3.06506e-05	0
TEX9	2.98861	3.03587	3.36695	2.99374	-0.00876378	0.364442	-0.042125	0.331081	0.00538946	0.054141	0.638655	4.20175e-05	0.00129826	0.745915	0.900703	0.979442	0.504357	0.00866154	0.0929431	0.645503	0.000143438	0.00388546	0.75463	0.943788	0.994142	0.5	0.152136	0.490051	0.622222	0.0167174	0.146965	0.725	0.645079	0.888812	0.514815	>	3.30844	18	48	24	3	0.428571	0.941176	0.857143	0.666667	0.709677	3.06506e-05	0
RPL17	12.8135	12.7761	13.1081	12.9738	0.171339	0.30562	0.197685	0.331966	2.37748e-06	0.000864149	0.769374	2.08768e-06	0.000174623	0.81781	0.00717277	0.425064	0.704793	6.92879e-05	0.00630517	0.742063	4.95238e-05	0.00192613	0.790509	0.0243795	0.628517	0.677469	0.000174504	0.0614079	0.834921	8.26117e-05	0.021074	0.883333	0.00613584	0.372852	0.77037	>	12.762	40	21	2	30	0.952381	0.411765	0.571429	0.913043	0.655914	3.1244e-05	0
KIFC1	5.52839	5.58772	5.82642	5.7088	0.162967	0.280584	0.121085	0.238702	6.92129e-05	0.00439249	0.739963	7.89203e-05	0.00204419	0.785948	0.0262729	0.4849	0.678649	3.5241e-05	0.00426786	0.765873	3.23958e-05	0.00142023	0.810185	0.010491	0.581574	0.70679	0.0301961	0.267673	0.677778	0.020349	0.159139	0.727778	0.234387	0.67354	0.611111	>	5.48033	40	21	2	30	0.952381	0.411765	0.571429	0.913043	0.655914	3.1244e-05	0
CKS1B	10.4227	10.1404	10.8613	10.8064	0.466773	0.521652	0.666071	0.72095	1.87351e-05	0.00215249	0.739496	0.000274267	0.00473069	0.745915	0.00313589	0.387853	0.730937	0.000279747	0.0131874	0.721561	0.00136036	0.0175105	0.726852	0.00956432	0.581574	0.714506	3.88902e-05	0.037114	0.78254	0.000340265	0.033351	0.791667	0.00197747	0.320411	0.77037	>	10.2127	40	21	2	30	0.952381	0.411765	0.571429	0.913043	0.655914	3.1244e-05	0
TGFB1	6.22754	6.18388	5.83795	6.03421	-0.18049	-0.376752	-0.149672	-0.345933	0.00014094	0.00643418	0.718487	8.5838e-05	0.00217765	0.758987	0.0567356	0.548174	0.664488	0.000253641	0.0125198	0.725529	0.000154513	0.00409705	0.767361	0.0481759	0.677709	0.669753	0.0159032	0.216937	0.701587	0.00758653	0.100391	0.738889	0.185827	0.634479	0.651852	<	6.28952	40	21	2	30	0.952381	0.411765	0.571429	0.913043	0.655914	3.1244e-05	0
CYP3A43	3.31738	3.26668	3.19	3.21226	-0.0902073	-0.112466	-0.0544159	-0.0766748	0.00035536	0.011063	0.717087	0.00126723	0.0134967	0.737745	0.0203234	0.469558	0.689542	0.00022434	0.0116186	0.737434	0.000831304	0.0127248	0.760417	0.0125196	0.584174	0.70679	0.0927342	0.408247	0.668254	0.0903078	0.325287	0.683333	0.26982	0.70172	0.648148	<	3.3477	40	21	2	30	0.952381	0.411765	0.571429	0.913043	0.655914	3.1244e-05	0
HDAC11	6.16941	6.27039	5.91255	6.03065	-0.168456	-0.28656	-0.23974	-0.357844	1.23413e-05	0.00177493	0.759104	1.38321e-05	0.000618608	0.80719	0.0169907	0.453462	0.694989	0.000318916	0.0138597	0.728175	0.000185153	0.00456963	0.780093	0.056884	0.692808	0.658951	5.59036e-05	0.0399132	0.833333	4.58285e-05	0.0153255	0.872222	0.00717922	0.377587	0.781481	<	6.20028	36	29	6	22	0.857143	0.568627	0.62069	0.828571	0.698925	3.15245e-05	0
NBEAL2	5.99225	5.89979	5.64277	5.82786	-0.137192	-0.322286	-0.0719251	-0.257019	0.000272324	0.00952924	0.707283	0.000133912	0.00291923	0.765523	0.0901199	0.591657	0.62963	0.000301469	0.0135431	0.718915	0.000199716	0.00481027	0.77662	0.0595323	0.695432	0.641975	0.046241	0.310049	0.679365	0.016733	0.146973	0.738889	0.385187	0.767247	0.6	<	5.92856	36	29	6	22	0.857143	0.568627	0.62069	0.828571	0.698925	3.15245e-05	0
MED1	7.15799	7.03404	7.5449	7.24961	0.128076	0.423367	0.215566	0.510857	0.00114257	0.0216709	0.705415	7.26916e-05	0.00192985	0.767157	0.214636	0.719334	0.623094	0.0111995	0.106749	0.679233	0.00103669	0.0147228	0.741898	0.414266	0.892275	0.595679	0.00746787	0.168631	0.768254	0.00127087	0.051432	0.827778	0.120392	0.5726	0.688889	>	7.07793	36	29	6	22	0.857143	0.568627	0.62069	0.828571	0.698925	3.15245e-05	0
SH3BP1	6.59234	6.59117	6.23843	6.53105	-0.06094	-0.353558	-0.0601143	-0.352732	0.00107312	0.02095	0.65733	4.98986e-05	0.00146479	0.750817	0.460523	0.852595	0.53268	0.00333504	0.0542479	0.650132	0.00023945	0.00542111	0.741898	0.489107	0.913656	0.527778	0.0186374	0.228847	0.674603	0.00188354	0.0588942	0.772222	0.484522	0.818425	0.544444	<	6.77654	42	16	0	35	1	0.313725	0.545455	1	0.623656	3.24918e-05	0
ARID1B	6.02746	5.97917	6.19282	6.14847	0.135208	0.179563	0.169298	0.213653	2.88253e-06	0.000966553	0.760037	2.65728e-05	0.000957147	0.765523	0.000869662	0.378067	0.752723	0.000103659	0.00764666	0.740741	0.000401666	0.00764006	0.747685	0.00474771	0.581574	0.731481	0.000185953	0.0614398	0.806349	0.000788284	0.044045	0.808333	0.0014947	0.317632	0.803704	>	6.23849	16	49	26	2	0.380952	0.960784	0.888889	0.653333	0.698925	3.48141e-05	0
DNMT3A	5.57414	5.65584	6.14064	5.77489	0.176725	0.542471	0.119056	0.484802	2.658e-06	0.000948858	0.758637	2.91747e-09	2.43013e-06	0.872549	0.0644915	0.560417	0.606754	1.47539e-05	0.00273054	0.774471	4.6275e-08	2.20258e-05	0.87963	0.0633399	0.703735	0.634259	0.00791596	0.170088	0.720635	5.84463e-05	0.0169333	0.855556	0.353762	0.750246	0.540741	>	6.11149	16	49	26	2	0.380952	0.960784	0.888889	0.653333	0.698925	3.48141e-05	0
RBM15	6.30446	6.35392	6.76307	6.44067	0.121663	0.444063	0.0867473	0.409148	4.45553e-06	0.00113165	0.7493	5.05789e-08	1.63084e-05	0.830882	0.0642764	0.559647	0.640523	2.59114e-05	0.00367373	0.755291	6.89142e-07	0.000112923	0.83912	0.0567388	0.692808	0.643519	0.00822105	0.170088	0.734921	0.000593712	0.0390629	0.811111	0.263975	0.697455	0.633333	>	6.72627	16	49	26	2	0.380952	0.960784	0.888889	0.653333	0.698925	3.48141e-05	0
HNRNPR	8.59086	8.63868	9.01971	8.74647	0.14155	0.414784	0.107794	0.381028	5.71705e-06	0.00116622	0.739963	1.79969e-07	3.69981e-05	0.81781	0.0343724	0.499555	0.636166	2.42069e-05	0.00350667	0.751984	1.2222e-06	0.000159693	0.826389	0.0271122	0.636395	0.652778	0.0108935	0.186129	0.711111	0.00154188	0.0555053	0.797222	0.22822	0.669372	0.596296	>	8.97287	16	49	26	2	0.380952	0.960784	0.888889	0.653333	0.698925	3.48141e-05	0
CEACAM5	7.16698	7.14322	5.80484	6.59799	-0.562006	-1.35515	-0.54523	-1.33838	5.33229e-05	0.00367579	0.731092	5.71392e-06	0.000343605	0.804739	0.0619405	0.557596	0.632898	0.000179583	0.0104736	0.733466	1.69701e-05	0.000919304	0.813657	0.0660156	0.703845	0.626543	0.00893711	0.174474	0.725397	0.00172408	0.0572527	0.783333	0.182048	0.630727	0.648148	<	5.28708	16	49	26	2	0.380952	0.960784	0.888889	0.653333	0.698925	3.48141e-05	0
IL6R	5.72553	5.6707	5.02822	5.48792	-0.221491	-0.68119	-0.182788	-0.642487	6.7119e-05	0.00431926	0.723623	3.12882e-06	0.000225806	0.795752	0.108451	0.611101	0.627451	0.000220785	0.0115149	0.722222	1.3909e-05	0.000803628	0.798611	0.104539	0.73572	0.62037	0.0147192	0.208317	0.726984	0.00184302	0.0583897	0.788889	0.294853	0.717425	0.644444	<	5.02341	16	49	26	2	0.380952	0.960784	0.888889	0.653333	0.698925	3.48141e-05	0
OBFC1	5.67965	5.71662	5.39908	5.45513	-0.235396	-0.291442	-0.26149	-0.317536	0.000286906	0.00980345	0.721289	0.000968169	0.0111683	0.75	0.0179065	0.457052	0.683007	0.00188545	0.0387779	0.696429	0.00412763	0.0360015	0.722222	0.0413342	0.668537	0.662037	0.00237862	0.115019	0.780952	0.00226583	0.0614602	0.816667	0.0224932	0.427557	0.733333	<	5.27695	16	49	26	2	0.380952	0.960784	0.888889	0.653333	0.698925	3.48141e-05	0
C16orf87	4.51587	4.51992	4.9578	4.69623	0.179169	0.440745	0.17631	0.437886	0.000160019	0.00689964	0.717087	1.8114e-05	0.000743724	0.764706	0.0645307	0.560417	0.653595	0.000663281	0.0215604	0.71627	8.38097e-05	0.00268931	0.765046	0.0770548	0.7099	0.651235	0.0190528	0.230815	0.719048	0.00521711	0.0860165	0.763889	0.199034	0.644354	0.659259	>	5.03624	16	49	26	2	0.380952	0.960784	0.888889	0.653333	0.698925	3.48141e-05	0
SPRR4	6.81455	6.70877	6.30883	6.64375	-0.139694	-0.474609	-0.0650194	-0.399935	0.00131255	0.023516	0.712885	0.000169286	0.00338578	0.844771	0.333088	0.788282	0.537037	0.00246733	0.0455023	0.705026	0.000528106	0.00918033	0.831019	0.306353	0.848695	0.537037	0.0130444	0.199143	0.731746	2.49877e-05	0.0143733	0.877778	0.585868	0.863477	0.537037	<	6.26331	16	49	26	2	0.380952	0.960784	0.888889	0.653333	0.698925	3.48141e-05	0
GRHL3	7.38435	6.34143	5.13919	6.74701	-0.330596	-1.93842	0.405588	-1.20224	0.000193778	0.00776315	0.704949	1.26897e-06	0.000122551	0.803105	0.37223	0.81192	0.574074	2.03277e-05	0.00325097	0.749339	1.29908e-07	4.10722e-05	0.835648	0.0758208	0.709743	0.634259	0.312309	0.649945	0.598413	0.03065	0.192741	0.725	0.403816	0.777153	0.57037	<	4.587	16	49	26	2	0.380952	0.960784	0.888889	0.653333	0.698925	3.48141e-05	0
C11orf58	6.8093	6.76456	7.03983	6.85312	0.0569752	0.243691	0.0885525	0.275269	0.000573496	0.0145492	0.701214	1.8702e-05	0.000761451	0.790033	0.277828	0.758272	0.582789	0.00326822	0.0537115	0.687831	0.000112545	0.0033118	0.787037	0.395639	0.88628	0.555556	0.0125857	0.197081	0.733333	0.00239197	0.0632512	0.797222	0.256435	0.690915	0.648148	>	7.0178	16	49	26	2	0.380952	0.960784	0.888889	0.653333	0.698925	3.48141e-05	0
TTLL4	5.23605	5.26932	5.71143	5.38349	0.137657	0.465596	0.11417	0.442109	0.000854959	0.0181054	0.669935	3.26973e-05	0.00109489	0.745915	0.103371	0.607032	0.568627	0.00337068	0.0543852	0.677249	0.000273164	0.00590689	0.751157	0.126899	0.748967	0.578704	0.0771621	0.376718	0.652381	0.0212172	0.162546	0.733333	0.407928	0.780373	0.544444	>	5.55281	16	49	26	2	0.380952	0.960784	0.888889	0.653333	0.698925	3.48141e-05	0
ZNF713	2.94166	3.01209	3.81761	3.13408	0.171705	0.855234	0.121992	0.805521	0.000241946	0.00890507	0.668067	2.15089e-06	0.000179161	0.790033	0.193443	0.702163	0.505447	0.00113585	0.0290739	0.686508	2.99522e-05	0.00134859	0.791667	0.199889	0.799973	0.546296	0.0464301	0.310637	0.62381	0.00582219	0.0901481	0.786111	0.513164	0.833136	0.592593	>	3.52638	16	49	26	2	0.380952	0.960784	0.888889	0.653333	0.698925	3.48141e-05	0
HAS3	7.17259	7.13381	6.24535	7.25922	0.0980391	-0.915832	0.125411	-0.88846	0.00771771	0.0669148	0.650327	6.95448e-06	0.000388936	0.808007	0.62014	0.906895	0.559913	0.0179079	0.137533	0.652778	5.93659e-05	0.00216075	0.804398	0.69562	0.958346	0.549383	0.105269	0.427079	0.644444	0.00168919	0.0566588	0.816667	0.616416	0.876376	0.585185	<	6.21019	16	49	26	2	0.380952	0.960784	0.888889	0.653333	0.698925	3.48141e-05	0
NFE2L3	5.9616	6.08637	6.79483	6.44314	0.444845	0.796534	0.35677	0.70846	0.00266505	0.0361936	0.635854	0.00180225	0.0171666	0.648693	0.0366287	0.505664	0.618736	0.0061152	0.0762944	0.648148	0.00456111	0.0385381	0.662037	0.0428264	0.668977	0.62963	0.116219	0.442448	0.606349	0.0838435	0.31337	0.616667	0.23293	0.671736	0.592593	>	6.85618	16	49	26	2	0.380952	0.960784	0.888889	0.653333	0.698925	3.48141e-05	0
POLD1	7.0825	7.12563	7.4387	7.15435	0.0591593	0.343518	0.0287123	0.313071	0.012504	0.0883279	0.629318	0.000942451	0.0109783	0.715686	0.553386	0.886546	0.514161	0.0166813	0.13186	0.640873	0.00145045	0.0182709	0.726852	0.483162	0.910963	0.526235	0.185693	0.531925	0.601587	0.052177	0.250573	0.688889	0.84402	0.959064	0.514815	>	7.63755	16	49	26	2	0.380952	0.960784	0.888889	0.653333	0.698925	3.48141e-05	0
ZBED2	6.26595	5.87382	5.19066	6.11852	-0.0320922	-0.959957	0.2447	-0.683165	0.056607	0.213033	0.613445	0.00551543	0.0367775	0.723039	0.926897	0.985105	0.53268	0.043855	0.222063	0.628307	0.00575026	0.0452164	0.736111	0.701981	0.95952	0.515432	0.515041	0.786926	0.577778	0.14519	0.409435	0.691667	0.571177	0.858706	0.574074	<	4.81758	16	49	26	2	0.380952	0.960784	0.888889	0.653333	0.698925	3.48141e-05	0
SLC38A7	5.96958	5.94755	5.72363	6.02471	0.0616076	-0.239467	0.0771614	-0.223913	0.107786	0.309234	0.59197	0.00263886	0.0222494	0.707516	0.437496	0.842944	0.562092	0.126298	0.385939	0.603836	0.00451513	0.0383604	0.711806	0.509143	0.920195	0.540123	0.382022	0.702617	0.563492	0.0561165	0.258306	0.697222	0.476809	0.816226	0.614815	<	5.6488	16	49	26	2	0.380952	0.960784	0.888889	0.653333	0.698925	3.48141e-05	0
EAPP	8.73972	8.70687	8.94025	8.83877	0.108715	0.210198	0.131901	0.233384	0.0800187	0.260409	0.589636	0.0547762	0.170893	0.620098	0.326124	0.782863	0.54902	0.146693	0.417049	0.583995	0.101451	0.282116	0.614583	0.41548	0.892275	0.54321	0.213732	0.561778	0.603175	0.16036	0.42829	0.633333	0.3995	0.775607	0.562963	>	9.149	16	49	26	2	0.380952	0.960784	0.888889	0.653333	0.698925	3.48141e-05	0
LCN2	9.84565	8.57595	6.98016	8.78229	-0.689915	-2.49204	0.206341	-1.59579	7.02439e-05	0.00443643	0.729225	7.58109e-07	8.51425e-05	0.830065	0.204113	0.711122	0.594771	1.10966e-05	0.00268835	0.776455	1.11404e-07	3.7747e-05	0.87037	0.0611699	0.698523	0.651235	0.168183	0.509415	0.615873	0.00734802	0.0994504	0.733333	0.75827	0.932147	0.540741	<	6.23392	14	50	28	1	0.333333	0.980392	0.933333	0.641026	0.688172	3.57745e-05	0
RPL13A	12.9265	13.025	13.1689	13.0694	0.113987	0.213437	0.0444437	0.143894	0.00016152	0.00692907	0.722222	3.00402e-05	0.00103345	0.784314	0.0507971	0.537974	0.639434	0.00015277	0.00975725	0.75463	4.12585e-05	0.00166626	0.811343	0.0335321	0.651192	0.679012	0.107821	0.430699	0.644444	0.0173249	0.149012	0.719444	0.539634	0.844465	0.544444	>	13.2503	14	50	28	1	0.333333	0.980392	0.933333	0.641026	0.688172	3.57745e-05	0
SUV420H1	7.43938	7.42331	7.85824	7.57932	0.144665	0.423582	0.156013	0.434929	0.000154353	0.00679663	0.712418	2.75049e-06	0.000210671	0.803922	0.130351	0.638367	0.590414	0.00115827	0.0294626	0.707672	4.0427e-05	0.0016393	0.795139	0.195267	0.797212	0.591049	0.01015	0.182176	0.72381	0.000474927	0.0372816	0.825	0.226591	0.668172	0.588889	>	7.90548	14	50	28	1	0.333333	0.980392	0.933333	0.641026	0.688172	3.57745e-05	0
AHNAK2	6.27965	6.0364	5.07864	5.96464	-0.243465	-1.12947	-0.0717578	-0.957758	6.07513e-05	0.00402145	0.70775	3.74927e-07	5.20497e-05	0.804739	0.218297	0.720438	0.578431	7.24287e-05	0.00646394	0.720238	6.2603e-07	0.000107888	0.81713	0.115325	0.741665	0.591049	0.0497898	0.31995	0.677778	0.00363483	0.0741817	0.775	0.790805	0.942902	0.548148	<	4.74401	14	50	28	1	0.333333	0.980392	0.933333	0.641026	0.688172	3.57745e-05	0
ART3	2.62535	2.64452	4.01431	2.76808	0.137088	1.38332	0.123561	1.36979	0.00122131	0.022544	0.70028	3.50677e-05	0.00115302	0.763889	0.0172679	0.453462	0.615468	0.00600957	0.0757576	0.705026	0.000444286	0.00821621	0.770833	0.0300434	0.64222	0.617284	0.0794938	0.38201	0.688889	0.0227293	0.167804	0.747222	0.185578	0.634479	0.611111	>	2.87488	14	50	28	1	0.333333	0.980392	0.933333	0.641026	0.688172	3.57745e-05	0
PCDHGC5	3.03542	3.04019	2.94671	2.94845	-0.0883696	-0.0901181	-0.0917314	-0.09348	0.00226777	0.0327168	0.69888	0.00727536	0.0441804	0.674837	0.012711	0.445056	0.730937	0.00730589	0.0845698	0.705026	0.0162915	0.0888389	0.677083	0.0233038	0.626356	0.742284	0.0557348	0.333991	0.684127	0.0826905	0.311239	0.669444	0.0951952	0.54163	0.703704	<	2.84548	14	50	28	1	0.333333	0.980392	0.933333	0.641026	0.688172	3.57745e-05	0
RHOV	8.05456	7.38243	6.85198	7.55818	-0.298699	-1.0049	0.175751	-0.53045	0.000440547	0.0124278	0.696078	2.58345e-05	0.000939013	0.781046	0.215086	0.719334	0.582789	3.04047e-05	0.00389579	0.75463	1.6976e-06	0.000195868	0.829861	0.0378168	0.663453	0.654321	0.433326	0.738124	0.555556	0.0943605	0.332043	0.663889	0.569631	0.858287	0.588889	<	6.38692	14	50	28	1	0.333333	0.980392	0.933333	0.641026	0.688172	3.57745e-05	0
STARD5	7.14415	6.9805	6.37315	6.68899	-0.407029	-0.72287	-0.291506	-0.607347	0.000500308	0.0133533	0.688142	0.000432121	0.00647733	0.702614	0.0415672	0.516773	0.668845	0.000775711	0.0238526	0.694444	0.000704048	0.0113206	0.703704	0.0339696	0.651192	0.682099	0.0560605	0.334712	0.673016	0.0331599	0.200225	0.7	0.229987	0.671041	0.637037	<	5.99273	14	50	28	1	0.333333	0.980392	0.933333	0.641026	0.688172	3.57745e-05	0
SAMD9	7.72351	7.26306	6.71234	6.96625	-0.621833	-0.875745	-0.29681	-0.550723	0.00117584	0.0220357	0.674603	0.00185293	0.0174388	0.696078	0.0287924	0.489406	0.645969	0.000535705	0.018921	0.712963	0.000883005	0.0131536	0.732639	0.0107138	0.581574	0.686728	0.215951	0.564692	0.58254	0.171673	0.442943	0.608333	0.430571	0.790843	0.548148	<	5.86166	14	50	28	1	0.333333	0.980392	0.933333	0.641026	0.688172	3.57745e-05	0
POM121L9P	4.77601	4.96172	4.74797	4.72126	-0.109369	-0.0826592	-0.240459	-0.213749	0.0693841	0.240157	0.656863	0.20431	0.398319	0.662582	0.065388	0.562951	0.649237	0.46726	0.727744	0.60582	0.677857	0.831352	0.621528	0.319906	0.85385	0.584877	0.00642324	0.158749	0.779365	0.0355963	0.206802	0.761111	0.00277269	0.347555	0.803704	<	4.55903	14	50	28	1	0.333333	0.980392	0.933333	0.641026	0.688172	3.57745e-05	0
C19orf33	8.54883	8.26597	6.85436	8.11674	-0.348899	-1.61128	-0.149235	-1.41162	0.0054824	0.05469	0.655929	0.000390941	0.00600254	0.732026	0.4635	0.853522	0.554466	0.00739603	0.0852185	0.666667	0.000676801	0.0109714	0.741898	0.400045	0.888114	0.566358	0.119098	0.446277	0.630159	0.0180972	0.152329	0.708333	0.800735	0.94551	0.525926	<	6.06678	14	50	28	1	0.333333	0.980392	0.933333	0.641026	0.688172	3.57745e-05	0
MIF4GD	7.98535	7.93245	7.60962	7.711	-0.258798	-0.36017	-0.221459	-0.322831	0.00984135	0.0768328	0.652661	0.0140722	0.0686308	0.683824	0.0881441	0.590481	0.611111	0.0135245	0.118299	0.660053	0.0172388	0.0922188	0.686343	0.0841588	0.716763	0.625	0.131209	0.464657	0.634921	0.123711	0.378453	0.677778	0.271123	0.702256	0.577778	<	7.30994	14	50	28	1	0.333333	0.980392	0.933333	0.641026	0.688172	3.57745e-05	0
ZNF428	5.31577	5.34275	5.56989	5.34569	0.0219801	0.24618	0.00293496	0.227135	0.00377972	0.0438539	0.652194	3.03595e-05	0.00103924	0.748366	0.696846	0.92625	0.523965	0.00794387	0.0887788	0.65873	0.000143313	0.00388546	0.753472	0.633018	0.946288	0.532407	0.117542	0.443908	0.636508	0.0106435	0.119872	0.736111	0.970758	0.992148	0.503704	>	5.62433	14	50	28	1	0.333333	0.980392	0.933333	0.641026	0.688172	3.57745e-05	0
KLK14	5.31722	5.23378	5.01797	5.29676	0.00407605	-0.274712	0.0629728	-0.215815	0.0874667	0.274699	0.629785	0.0065273	0.0411113	0.719771	0.974118	0.993685	0.509804	0.0858078	0.316025	0.631614	0.00906305	0.0609557	0.721065	0.886594	0.985385	0.512346	0.419787	0.728366	0.625397	0.0311745	0.194692	0.716667	0.673375	0.901554	0.503704	<	4.83747	14	50	28	1	0.333333	0.980392	0.933333	0.641026	0.688172	3.57745e-05	0
LARP6	7.42904	7.69917	7.85564	7.72915	0.220667	0.347151	0.0299826	0.156468	0.0313848	0.151622	0.626984	0.0197227	0.0866135	0.666667	0.184087	0.692233	0.574074	0.0159646	0.128897	0.662037	0.00972867	0.0636646	0.693287	0.100393	0.734793	0.62037	0.637058	0.85181	0.542857	0.472893	0.719891	0.602778	0.901474	0.974945	0.537037	>	8.36066	14	50	28	1	0.333333	0.980392	0.933333	0.641026	0.688172	3.57745e-05	0
BACH2	4.81267	4.97207	5.13882	5.11317	0.253619	0.279268	0.1411	0.166749	0.0119543	0.0859017	0.623249	0.0252547	0.102081	0.627451	0.0325683	0.495355	0.617647	0.0096749	0.098679	0.652778	0.0204341	0.101971	0.653935	0.0206984	0.620524	0.651235	0.362507	0.690732	0.552381	0.385581	0.652446	0.563889	0.390066	0.770532	0.537037	>	5.41531	14	50	28	1	0.333333	0.980392	0.933333	0.641026	0.688172	3.57745e-05	0
GNG12	7.73349	7.63188	7.45302	7.54582	-0.157786	-0.250577	-0.086066	-0.178857	0.0386437	0.171359	0.61718	0.0345241	0.125939	0.640523	0.217566	0.720318	0.586057	0.0355544	0.198096	0.632275	0.0319509	0.135324	0.655093	0.178233	0.78652	0.601852	0.36058	0.689136	0.580952	0.272523	0.54997	0.605556	0.608089	0.873173	0.548148	<	7.07586	14	50	28	1	0.333333	0.980392	0.933333	0.641026	0.688172	3.57745e-05	0
SLC34A3	5.65971	5.71755	5.56934	5.63974	-0.0369781	-0.107379	-0.0778013	-0.148202	0.0256591	0.134297	0.614846	0.00953528	0.0532606	0.671569	0.355608	0.8023	0.539216	0.120693	0.377162	0.585979	0.0483785	0.176484	0.652778	0.643381	0.947603	0.503086	0.0334025	0.274457	0.684127	0.0206649	0.16037	0.716667	0.1638	0.618248	0.640741	<	5.48016	14	50	28	1	0.333333	0.980392	0.933333	0.641026	0.688172	3.57745e-05	0
RELB	6.68682	6.59582	6.63022	6.6005	-0.0595577	-0.0298313	0.00467741	0.0344039	0.795124	0.897483	0.565826	0.880003	0.9369	0.544118	0.697647	0.926412	0.594771	0.714044	0.874285	0.578042	0.802758	0.902661	0.555556	0.605601	0.93915	0.608025	0.938415	0.978849	0.536508	0.917616	0.968028	0.516667	0.983285	0.994326	0.562963	<	6.04363	14	50	28	1	0.333333	0.980392	0.933333	0.641026	0.688172	3.57745e-05	0
MATR3	8.35316	8.39505	8.68315	8.5513	0.185818	0.317675	0.156244	0.288101	3.79291e-06	0.00104453	0.76564	2.97014e-06	0.000218294	0.803922	0.00683466	0.425064	0.714597	1.22904e-05	0.00268835	0.775794	8.63544e-06	0.000580167	0.811343	0.00679537	0.581574	0.728395	0.00517741	0.146396	0.74127	0.0022291	0.0609934	0.786111	0.0796281	0.52542	0.681481	>	8.56368	25	42	17	9	0.595238	0.823529	0.735294	0.711864	0.72043	3.68015e-05	0
TNFRSF13C	5.48436	5.62755	5.31526	5.35726	-0.16922	-0.211218	-0.270289	-0.312286	2.8696e-05	0.00271877	0.74043	9.23619e-05	0.00229367	0.75817	0.00324003	0.387853	0.716776	0.00248578	0.0456324	0.695767	0.00310634	0.0299416	0.71412	0.0345225	0.651192	0.671296	3.97531e-05	0.037114	0.847619	8.32798e-05	0.021074	0.863889	0.000766209	0.316797	0.825926	<	5.36436	25	42	17	9	0.595238	0.823529	0.735294	0.711864	0.72043	3.68015e-05	0
FADS2	5.78325	5.65707	6.04429	6.0071	0.26096	0.298154	0.350025	0.387218	7.1517e-05	0.0044678	0.725957	0.000268033	0.00466764	0.742647	0.00305561	0.387853	0.703704	0.00190259	0.0389968	0.701058	0.00347364	0.0322234	0.721065	0.0189798	0.620524	0.674383	0.000673538	0.0836317	0.785714	0.00101919	0.0476041	0.794444	0.00403189	0.363531	0.774074	>	6.00946	25	42	17	9	0.595238	0.823529	0.735294	0.711864	0.72043	3.68015e-05	0
ST6GALNAC4	5.89941	6.01098	5.63394	5.66743	-0.264791	-0.298285	-0.343548	-0.377043	6.67852e-05	0.00431926	0.723623	0.00045245	0.00666047	0.720588	0.00213964	0.387853	0.727669	0.00191191	0.0390952	0.689153	0.00576208	0.0452434	0.693287	0.0161814	0.608634	0.683642	0.00048783	0.0797171	0.806349	0.00127621	0.051432	0.786111	0.00105051	0.316797	0.833333	<	5.7401	25	42	17	9	0.595238	0.823529	0.735294	0.711864	0.72043	3.68015e-05	0
TET1	5.35603	5.30985	6.39687	5.70866	0.366214	1.05442	0.398813	1.08702	6.01229e-05	0.00399308	0.720822	2.96248e-06	0.000218294	0.793301	0.0627015	0.557728	0.624183	0.000631172	0.0208558	0.71164	5.54711e-05	0.00205986	0.78125	0.111648	0.737956	0.618827	0.0072012	0.165762	0.742857	0.00110205	0.0486734	0.822222	0.104121	0.553585	0.637037	>	5.95334	25	42	17	9	0.595238	0.823529	0.735294	0.711864	0.72043	3.68015e-05	0
SNHG6	11.6324	11.5103	12.0788	11.7761	0.179603	0.482324	0.265787	0.568507	0.000910678	0.0190035	0.696545	0.000249964	0.00442998	0.73366	0.124734	0.632746	0.647059	0.0075856	0.0866053	0.681878	0.00216012	0.0237009	0.719907	0.246881	0.819103	0.631173	0.00677541	0.163076	0.731746	0.00337488	0.0720648	0.766667	0.0579097	0.497924	0.685185	>	11.8546	25	42	17	9	0.595238	0.823529	0.735294	0.711864	0.72043	3.68015e-05	0
USP21	7.59345	7.43313	7.83558	7.67999	0.133694	0.289279	0.246861	0.402446	0.01837	0.110281	0.649393	0.0113079	0.0597876	0.678105	0.196805	0.705537	0.611111	0.0917707	0.32744	0.626984	0.0506669	0.181588	0.655093	0.415509	0.892275	0.589506	0.028473	0.263083	0.703175	0.025591	0.177462	0.733333	0.0870039	0.534037	0.662963	>	7.752	25	42	17	9	0.595238	0.823529	0.735294	0.711864	0.72043	3.68015e-05	0
NFKBIZ	8.84733	8.88114	7.7173	8.05849	-0.798787	-1.13998	-0.822649	-1.16384	4.48952e-06	0.00113165	0.756303	2.15315e-05	0.000827525	0.772876	0.00299592	0.387853	0.734205	3.09603e-05	0.00391726	0.746693	9.54749e-05	0.00292736	0.761574	0.00521212	0.581574	0.726852	0.000797999	0.0876316	0.779365	0.00125679	0.0513794	0.8	0.0104333	0.393563	0.751852	<	8.90825	38	25	4	26	0.904762	0.490196	0.59375	0.862069	0.677419	3.85528e-05	0
PCSK7	5.84135	5.81022	5.61881	5.66279	-0.1694	-0.213381	-0.147427	-0.191409	4.11029e-05	0.00326058	0.735761	0.000101093	0.00244963	0.760621	0.00705419	0.425064	0.702614	0.000114559	0.00809238	0.736111	0.000203881	0.00486269	0.758102	0.00933039	0.581574	0.70679	0.0110285	0.186523	0.734921	0.00739782	0.0994531	0.766667	0.0761224	0.521858	0.692593	<	5.8563	38	25	4	26	0.904762	0.490196	0.59375	0.862069	0.677419	3.85528e-05	0
DPY30	10.0409	10.0576	10.4944	10.1611	0.115289	0.448645	0.103465	0.436822	0.000305879	0.0101239	0.718021	8.0224e-06	0.0004254	0.790033	0.241334	0.738144	0.622004	0.00100375	0.0270983	0.724206	3.76799e-05	0.00157586	0.796296	0.252236	0.820994	0.628086	0.0215964	0.238538	0.703175	0.00196511	0.0596284	0.775	0.415367	0.783658	0.607407	>	9.93964	38	25	4	26	0.904762	0.490196	0.59375	0.862069	0.677419	3.85528e-05	0
GRINA	7.81431	7.87555	7.40673	7.5908	-0.241519	-0.42559	-0.284746	-0.468818	0.00149809	0.0256847	0.69888	0.00175178	0.0168704	0.728758	0.0780619	0.58286	0.659041	0.00860431	0.0927772	0.67791	0.00865644	0.0590617	0.702546	0.149873	0.772307	0.645062	0.0057152	0.153154	0.749206	0.00431685	0.0802027	0.791667	0.0307591	0.451804	0.692593	<	7.89611	38	25	4	26	0.904762	0.490196	0.59375	0.862069	0.677419	3.85528e-05	0
TIPRL	7.63218	7.57229	7.96562	7.8484	0.233833	0.35106	0.276107	0.393334	0.00101024	0.0202354	0.697946	0.000977626	0.0112155	0.727124	0.0633809	0.557728	0.659041	0.0045409	0.0651375	0.689153	0.00320921	0.0305939	0.716435	0.110048	0.737742	0.652778	0.00653131	0.159813	0.719048	0.00242858	0.063253	0.752778	0.0859098	0.532859	0.674074	>	7.4873	38	25	4	26	0.904762	0.490196	0.59375	0.862069	0.677419	3.85528e-05	0
PM20D2	6.42359	6.30596	6.67896	6.59519	0.206203	0.289971	0.289233	0.373001	0.00289975	0.0380623	0.696078	0.00611988	0.0393511	0.721405	0.0651812	0.562668	0.662309	0.0167534	0.132179	0.668651	0.0229613	0.109761	0.693287	0.140432	0.765185	0.635802	0.00412039	0.139212	0.761905	0.00696	0.0970952	0.788889	0.0291278	0.447837	0.725926	>	6.29051	38	25	4	26	0.904762	0.490196	0.59375	0.862069	0.677419	3.85528e-05	0
FBXL4	5.56723	5.4036	5.8263	5.67957	0.160469	0.307201	0.275967	0.422698	0.00580055	0.0564826	0.689542	0.00398883	0.029479	0.720588	0.182027	0.690966	0.648148	0.0417099	0.215792	0.661376	0.0228904	0.109526	0.69213	0.382449	0.882327	0.62037	0.00236758	0.115019	0.757143	0.00103628	0.0477346	0.788889	0.0511008	0.489601	0.714815	>	5.4192	38	25	4	26	0.904762	0.490196	0.59375	0.862069	0.677419	3.85528e-05	0
EEF1E1	6.09662	6.3719	6.6562	6.30512	0.127535	0.478609	-0.0667795	0.284295	0.00434626	0.048083	0.687675	0.000532926	0.00746582	0.747549	0.387468	0.819496	0.607843	0.000630439	0.0208558	0.721561	5.53682e-05	0.00205986	0.784722	0.142131	0.767063	0.637346	0.430911	0.736046	0.606349	0.132857	0.393289	0.658333	0.73901	0.925245	0.537037	>	5.98612	38	25	4	26	0.904762	0.490196	0.59375	0.862069	0.677419	3.85528e-05	0
NTN4	6.62755	6.9548	6.0076	6.37886	-0.344944	-0.716202	-0.575946	-0.947204	0.0203678	0.117473	0.666667	0.0107364	0.0579627	0.701797	0.29998	0.768877	0.619826	0.0901777	0.324677	0.627646	0.0479132	0.175592	0.66088	0.507073	0.919061	0.583333	0.00968128	0.180708	0.760317	0.00132187	0.0520484	0.8	0.121016	0.573438	0.707407	<	6.91933	38	25	4	26	0.904762	0.490196	0.59375	0.862069	0.677419	3.85528e-05	0
KIF2A	5.50636	5.49203	5.81827	5.67448	0.172328	0.316127	0.182443	0.326242	4.27338e-05	0.00328324	0.735294	9.73569e-06	0.000485352	0.79902	0.023821	0.478057	0.650327	0.000424053	0.016397	0.73082	0.000109643	0.00327633	0.793981	0.05031	0.683717	0.646605	0.00422063	0.139637	0.746032	0.000775753	0.043933	0.811111	0.0688259	0.510827	0.659259	>	5.70931	23	44	19	7	0.547619	0.862745	0.766667	0.698413	0.72043	4.05991e-05	0
C12orf57	10.1605	10.3901	10.6846	10.4645	0.236433	0.456564	0.0743561	0.294487	4.91991e-05	0.00351264	0.735294	2.10155e-05	0.000817765	0.796569	0.0366195	0.505664	0.653595	1.48323e-05	0.00273054	0.768519	8.10434e-06	0.000560602	0.824074	0.0120609	0.584174	0.694444	0.0963893	0.413178	0.655556	0.0246199	0.174063	0.730556	0.573428	0.859261	0.555556	>	10.6181	23	44	19	7	0.547619	0.862745	0.766667	0.698413	0.72043	4.05991e-05	0
CCDC104	7.57629	7.91028	8.22448	7.92621	0.251692	0.549956	0.0159383	0.314202	2.9974e-05	0.00277412	0.724556	3.47001e-06	0.000242595	0.778595	0.0291093	0.489406	0.652505	5.38461e-06	0.00201048	0.779762	8.78287e-07	0.000129102	0.829861	0.0045548	0.581574	0.712963	0.21424	0.562277	0.592063	0.0513747	0.248383	0.655556	0.913789	0.976979	0.507407	>	8.0313	23	44	19	7	0.547619	0.862745	0.766667	0.698413	0.72043	4.05991e-05	0
ASF1A	7.07806	7.04716	7.59322	7.51931	0.450341	0.524251	0.472153	0.546063	0.000201966	0.00794783	0.723156	0.000265255	0.00463524	0.754902	0.0111903	0.442459	0.680828	0.00143686	0.0334391	0.710317	0.00146431	0.0183876	0.740741	0.0289326	0.64222	0.669753	0.00718793	0.165737	0.753968	0.00192504	0.0592967	0.788889	0.0468261	0.486033	0.707407	>	7.62321	23	44	19	7	0.547619	0.862745	0.766667	0.698413	0.72043	4.05991e-05	0
RABL5	6.74925	6.73705	7.09806	6.79293	0.0472743	0.3524	0.055882	0.361008	0.0178614	0.108465	0.648926	0.000960935	0.0111427	0.749183	0.693246	0.925847	0.515251	0.0372582	0.203172	0.653439	0.00275245	0.0276782	0.758102	0.738504	0.96899	0.513889	0.0940379	0.409746	0.638095	0.00942761	0.11189	0.727778	0.720672	0.919867	0.518519	>	7.00479	23	44	19	7	0.547619	0.862745	0.766667	0.698413	0.72043	4.05991e-05	0
FHOD1	6.45842	6.51524	6.14595	6.40254	-0.0725912	-0.329189	-0.112699	-0.369297	0.00697447	0.0632034	0.681139	0.00019989	0.00378167	0.776144	0.495233	0.867982	0.554466	0.0266413	0.169001	0.668651	0.00120298	0.0163596	0.759259	0.635657	0.946288	0.54784	0.0330847	0.274164	0.711111	0.00122505	0.0504949	0.816667	0.441008	0.79629	0.57037	<	6.20954	23	44	19	7	0.547619	0.862745	0.766667	0.698413	0.72043	4.05991e-05	0
ENG	6.57608	6.64671	6.13078	6.2453	-0.35155	-0.466076	-0.401405	-0.515931	5.09552e-06	0.00114199	0.756769	2.0294e-05	0.000803361	0.785948	0.00315558	0.387853	0.717865	8.36443e-05	0.00686098	0.740741	0.000179159	0.00449996	0.771991	0.0102114	0.581574	0.699074	0.000227827	0.0632569	0.795238	0.000232007	0.0286299	0.819444	0.0061926	0.372852	0.762963	<	6.28738	26	41	16	10	0.619048	0.803922	0.722222	0.719298	0.72043	4.08801e-05	0
ZNF670	4.47089	4.38763	5.12834	4.84829	0.401891	0.681934	0.460664	0.740707	2.24793e-05	0.00236517	0.739029	2.1737e-05	0.000831805	0.776961	0.00960361	0.427184	0.688453	0.000141854	0.00935908	0.731481	8.65326e-05	0.00272851	0.773148	0.0137496	0.587968	0.675926	0.00293811	0.122878	0.757143	0.00250958	0.0636323	0.786111	0.0366557	0.468376	0.718519	>	4.92476	26	41	16	10	0.619048	0.803922	0.722222	0.719298	0.72043	4.08801e-05	0
TUBB	11.5049	11.6809	11.9748	11.6691	0.112474	0.418125	-0.0117789	0.293872	0.000162627	0.00696161	0.732493	1.84528e-06	0.000160387	0.839052	0.258139	0.746469	0.590414	3.73481e-05	0.00436776	0.76918	2.50347e-07	5.82648e-05	0.875	0.108946	0.736535	0.628086	0.131498	0.464911	0.644444	0.00615905	0.0920519	0.752778	0.928857	0.980089	0.5	>	11.8099	26	41	16	10	0.619048	0.803922	0.722222	0.719298	0.72043	4.08801e-05	0
RBBP5	6.58474	6.64989	7.01314	6.91028	0.30638	0.409237	0.26039	0.363248	7.46194e-05	0.00454642	0.729225	0.000199017	0.00377114	0.745915	0.00606392	0.410689	0.706972	0.000183902	0.0104773	0.738757	0.000395035	0.00757156	0.75463	0.00661314	0.581574	0.717593	0.0200597	0.232607	0.706349	0.019413	0.156531	0.725	0.0728869	0.519112	0.681481	>	6.94453	26	41	16	10	0.619048	0.803922	0.722222	0.719298	0.72043	4.08801e-05	0
RPS3A	11.4018	11.4766	11.5826	11.5198	0.0959408	0.15879	0.0431957	0.106045	0.000143059	0.00647852	0.717087	0.000112845	0.00261704	0.756536	0.0277756	0.487435	0.664488	0.000108652	0.00788331	0.751984	0.000108541	0.00325068	0.783565	0.0159383	0.608082	0.709877	0.107501	0.430139	0.633333	0.0475578	0.238218	0.691667	0.424436	0.788516	0.555556	>	11.5078	26	41	16	10	0.619048	0.803922	0.722222	0.719298	0.72043	4.08801e-05	0
C20orf166	6.00472	6.11479	5.74804	5.92212	-0.114971	-0.289052	-0.192665	-0.366747	0.000134504	0.0063361	0.714753	3.99599e-06	0.00026717	0.814542	0.0970498	0.599358	0.581699	0.00349087	0.0552104	0.689815	0.000142312	0.00387285	0.788194	0.272858	0.832995	0.558642	0.000909848	0.0898268	0.774603	4.74192e-05	0.0153255	0.877778	0.0517151	0.49032	0.637037	<	5.9086	26	41	16	10	0.619048	0.803922	0.722222	0.719298	0.72043	4.08801e-05	0
KDM2B	8.1056	8.14956	8.49272	8.3023	0.183769	0.374192	0.152741	0.343164	0.000391389	0.0118729	0.702614	0.000271776	0.0047063	0.719771	0.0501925	0.537439	0.679739	0.000698276	0.0223706	0.710317	0.000486194	0.00871704	0.724537	0.0386003	0.667565	0.691358	0.0376753	0.28778	0.684127	0.0242189	0.172542	0.708333	0.205037	0.647945	0.651852	>	8.31322	26	41	16	10	0.619048	0.803922	0.722222	0.719298	0.72043	4.08801e-05	0
LOC401320	5.13413	5.1525	4.96482	5.01254	-0.126993	-0.174711	-0.139959	-0.187677	0.00137514	0.0243493	0.748366	0.00405981	0.0298491	0.789216	0.0320972	0.495104	0.6939	0.00447997	0.0646635	0.740079	0.00979247	0.0639116	0.787037	0.0470323	0.677709	0.677469	0.0170902	0.222756	0.768254	0.029643	0.189571	0.794444	0.0536464	0.492587	0.733333	<	5.10987	35	30	7	21	0.833333	0.588235	0.625	0.810811	0.698925	4.21155e-05	0
PHF3	5.87609	5.96267	6.28574	6.08411	0.182553	0.384187	0.121437	0.323072	1.20738e-05	0.00176719	0.746965	2.5169e-06	0.00019873	0.79902	0.0216674	0.469558	0.67756	1.51613e-05	0.00273054	0.76455	3.20031e-06	0.000301398	0.818287	0.0113181	0.583792	0.692901	0.0220731	0.241788	0.704762	0.00601197	0.0909225	0.752778	0.259343	0.694124	0.640741	>	5.89453	35	30	7	21	0.833333	0.588235	0.625	0.810811	0.698925	4.21155e-05	0
FZD3	4.75167	4.66849	5.45332	5.05124	0.324032	0.726109	0.382748	0.784825	0.00147288	0.0254488	0.718954	0.000530286	0.00743926	0.763072	0.148151	0.655168	0.660131	0.00432627	0.0634997	0.71627	0.00125652	0.0167349	0.756944	0.189609	0.791204	0.662037	0.0161693	0.217806	0.725397	0.00625205	0.0927187	0.777778	0.192623	0.640238	0.655556	>	4.56561	35	30	7	21	0.833333	0.588235	0.625	0.810811	0.698925	4.21155e-05	0
TNKS	4.34723	4.35978	4.5158	4.46238	0.111455	0.164883	0.102595	0.156024	0.000586012	0.0146804	0.70775	0.00115909	0.0126758	0.722222	0.0259595	0.482517	0.688453	0.00127058	0.0311864	0.720899	0.00211702	0.0233987	0.736111	0.0269816	0.636395	0.700617	0.0336773	0.274457	0.67619	0.0364356	0.209366	0.688889	0.1242	0.575946	0.659259	>	4.36475	35	30	7	21	0.833333	0.588235	0.625	0.810811	0.698925	4.21155e-05	0
RPS8	12.2099	12.3452	12.4417	12.3887	0.138972	0.192022	0.0434947	0.0965447	0.000761123	0.0169439	0.706816	0.00256601	0.02181	0.702614	0.0216811	0.469558	0.712418	0.000220499	0.0115149	0.744048	0.00113828	0.0157367	0.734954	0.00615808	0.581574	0.756173	0.278985	0.623801	0.61746	0.248597	0.528056	0.625	0.482544	0.818074	0.607407	>	12.2819	35	30	7	21	0.833333	0.588235	0.625	0.810811	0.698925	4.21155e-05	0
RPLP0	13.3663	13.3509	13.4439	13.5013	0.139529	0.0821574	0.150384	0.0930125	0.00462649	0.0496677	0.681606	0.0689562	0.198403	0.643791	0.00407172	0.399534	0.732026	0.0167495	0.132179	0.660714	0.126885	0.323912	0.625	0.0124542	0.584174	0.708333	0.0282159	0.263083	0.731746	0.122371	0.377102	0.688889	0.0107246	0.393563	0.788889	>	13.367	35	30	7	21	0.833333	0.588235	0.625	0.810811	0.698925	4.21155e-05	0
PGLYRP3	3.43139	3.38632	3.0645	3.20757	-0.210566	-0.353633	-0.178757	-0.321825	2.47916e-05	0.00251578	0.743697	3.37392e-05	0.0011204	0.810458	0.0310278	0.493634	0.654684	5.03688e-05	0.00514136	0.748016	6.01613e-05	0.00218273	0.814815	0.032877	0.651192	0.658951	0.00152416	0.104706	0.733333	0.000353134	0.0344366	0.8	0.0966509	0.543136	0.644444	<	3.15354	27	40	15	11	0.642857	0.784314	0.710526	0.727273	0.72043	4.49568e-05	0
ADNP2	7.72436	7.63731	8.09582	7.89554	0.196783	0.397063	0.258228	0.458508	0.000122061	0.00605492	0.742764	8.04186e-05	0.00206653	0.788399	0.0457552	0.525383	0.681917	0.000883317	0.0253445	0.729497	0.000408634	0.00774314	0.787037	0.080976	0.714354	0.652778	0.0020087	0.112526	0.774603	0.00155693	0.0556031	0.791667	0.0421231	0.484297	0.751852	>	7.95172	27	40	15	11	0.642857	0.784314	0.710526	0.727273	0.72043	4.49568e-05	0
NASP	5.89315	6.02913	6.43574	6.07607	0.142926	0.502601	0.0469378	0.406612	0.000137225	0.00639458	0.731092	4.45483e-06	0.000291034	0.809641	0.128486	0.637021	0.626362	0.00017537	0.0103416	0.759259	9.61494e-06	0.000616065	0.828704	0.0663924	0.703845	0.666667	0.080387	0.383924	0.663492	0.0133918	0.131905	0.763889	0.7076	0.914377	0.52963	>	6.0734	27	40	15	11	0.642857	0.784314	0.710526	0.727273	0.72043	4.49568e-05	0
WNK3	3.76891	3.81306	4.63268	4.07144	0.289547	0.850784	0.258379	0.819616	1.78601e-05	0.00212525	0.728758	2.07263e-07	3.90887e-05	0.812908	0.0615057	0.556365	0.616558	0.000100395	0.00748878	0.734788	1.83385e-06	0.000208298	0.81713	0.0693042	0.703845	0.625	0.0107985	0.185164	0.714286	0.00085879	0.0447277	0.802778	0.242655	0.680456	0.596296	>	4.01121	27	40	15	11	0.642857	0.784314	0.710526	0.727273	0.72043	4.49568e-05	0
ABHD14A	6.91234	7.02509	6.45684	6.75233	-0.19317	-0.488656	-0.27276	-0.568246	0.000182242	0.0074503	0.716153	2.81158e-05	0.00100189	0.775327	0.0942187	0.595357	0.637255	0.00207961	0.0414078	0.69709	0.000326992	0.00666638	0.756944	0.192923	0.794976	0.617284	0.00207999	0.112526	0.761905	0.000485909	0.0373608	0.819444	0.0583791	0.498955	0.685185	<	6.69075	27	40	15	11	0.642857	0.784314	0.710526	0.727273	0.72043	4.49568e-05	0
CEACAM6	9.36405	9.225	7.68889	8.5787	-0.744454	-1.63426	-0.646301	-1.53611	0.00042218	0.0121436	0.698413	0.000102028	0.00246333	0.749183	0.0875303	0.589944	0.630719	0.000886061	0.0253625	0.708333	0.000199628	0.00481027	0.75463	0.0848863	0.717031	0.646605	0.0303995	0.268663	0.674603	0.00921097	0.110825	0.736111	0.26673	0.700003	0.592593	<	8.45379	27	40	15	11	0.642857	0.784314	0.710526	0.727273	0.72043	4.49568e-05	0
CDKL1	3.56791	3.4863	3.36571	3.56562	0.0217186	-0.178199	0.0793231	-0.120595	0.0665374	0.234305	0.678805	0.000962607	0.0111487	0.78268	0.745198	0.938624	0.540305	0.0487808	0.234847	0.690476	0.00128546	0.0169959	0.791667	0.976533	0.998242	0.555556	0.623275	0.844853	0.650794	0.0370651	0.211469	0.761111	0.349423	0.747181	0.503704	<	3.43214	27	40	15	11	0.642857	0.784314	0.710526	0.727273	0.72043	4.49568e-05	0
MSH2	7.8463	7.98284	8.79252	8.22121	0.334753	0.906063	0.238371	0.809682	5.45253e-06	0.00114199	0.756769	2.47743e-07	4.10119e-05	0.830882	0.043453	0.520591	0.657952	1.06736e-05	0.00268835	0.773148	5.36529e-07	9.57657e-05	0.844907	0.0271033	0.636395	0.677469	0.00979028	0.180974	0.71746	0.00113748	0.049113	0.797222	0.270426	0.70203	0.611111	>	8.28977	28	39	14	12	0.666667	0.764706	0.7	0.735849	0.72043	4.92049e-05	0
WDR48	6.94919	6.99458	7.23188	7.06024	0.0977053	0.269343	0.0656646	0.237302	0.000263294	0.00931957	0.724556	1.58176e-05	0.000681486	0.804739	0.132819	0.639291	0.617647	0.000809682	0.0243404	0.746032	8.88493e-05	0.00277529	0.820602	0.138029	0.763512	0.646605	0.0329979	0.273835	0.673016	0.00287643	0.0672547	0.766667	0.401639	0.776309	0.548148	>	7.03277	28	39	14	12	0.666667	0.764706	0.7	0.735849	0.72043	4.92049e-05	0
RDH14	8.62371	8.69078	8.99808	8.82968	0.186244	0.354648	0.138895	0.307299	0.000140265	0.00643418	0.705882	4.40292e-05	0.00135352	0.75	0.0335485	0.499202	0.647059	0.000268351	0.0128957	0.726852	8.56942e-05	0.00272349	0.768519	0.0282612	0.641087	0.671296	0.0399197	0.294983	0.655556	0.0147854	0.138632	0.705556	0.250371	0.687565	0.588889	>	8.81515	28	39	14	12	0.666667	0.764706	0.7	0.735849	0.72043	4.92049e-05	0
CLIC3	6.90023	6.42807	5.64597	5.98617	-0.775191	-1.11539	-0.441902	-0.782096	0.000286078	0.00979279	0.734827	0.00048397	0.00697551	0.768791	0.0239916	0.478659	0.689542	0.000274793	0.0130484	0.753968	0.000509049	0.00898182	0.789352	0.0173267	0.617093	0.70679	0.0713078	0.364488	0.688889	0.0390227	0.216455	0.719444	0.24359	0.681732	0.648148	<	5.9696	28	39	14	12	0.666667	0.764706	0.7	0.735849	0.72043	4.92049e-05	0
BCAP29	5.51234	5.53577	5.36687	5.39799	-0.121237	-0.152362	-0.137777	-0.168902	0.00606451	0.0582304	0.686275	0.0103482	0.0564294	0.726307	0.0752395	0.575847	0.632898	0.020316	0.14604	0.669974	0.0271369	0.121752	0.708333	0.130258	0.755144	0.618827	0.0263953	0.256195	0.725397	0.0216777	0.164065	0.769444	0.101921	0.550491	0.666667	<	5.40227	28	39	14	12	0.666667	0.764706	0.7	0.735849	0.72043	4.92049e-05	0
ESAM	6.18083	6.37346	5.71852	5.94645	-0.291034	-0.518966	-0.427004	-0.654936	1.76281e-05	0.00212525	0.749767	1.9859e-05	0.000794001	0.808007	0.0294723	0.489406	0.672113	0.0003055	0.0136173	0.712302	0.00016368	0.00426615	0.771991	0.0809633	0.714354	0.632716	2.20547e-05	0.037114	0.839683	1.84813e-05	0.0130718	0.894444	0.00867355	0.389751	0.766667	<	6.28895	39	23	3	28	0.928571	0.45098	0.58209	0.884615	0.666667	4.92086e-05	0
CEACAM7	3.87777	3.91963	3.39451	3.42699	-0.463088	-0.495569	-0.492639	-0.525119	0.000914444	0.0190225	0.743697	0.00824187	0.048092	0.784314	0.0233626	0.473673	0.689542	0.0019161	0.0391264	0.752646	0.0129479	0.0764807	0.793981	0.0301174	0.64222	0.697531	0.00322277	0.127549	0.722222	0.0166943	0.146956	0.761111	0.0236991	0.431878	0.67037	<	3.73348	39	23	3	28	0.928571	0.45098	0.58209	0.884615	0.666667	4.92086e-05	0
BPGM	7.96933	7.65938	7.32853	7.57233	-0.305841	-0.549644	-0.0870539	-0.330856	0.000185493	0.00751704	0.718954	0.000157957	0.00322546	0.767157	0.0586035	0.551003	0.654684	2.85289e-05	0.00377697	0.763228	2.94526e-05	0.00133171	0.80787	0.018204	0.618488	0.703704	0.133201	0.465888	0.612698	0.0459715	0.235103	0.669444	0.638877	0.886315	0.537037	<	8.01551	39	23	3	28	0.928571	0.45098	0.58209	0.884615	0.666667	4.92086e-05	0
TTK	7.89299	7.60188	8.51422	8.29576	0.488394	0.706855	0.693879	0.912339	0.000255372	0.00918497	0.718021	0.000863674	0.0103573	0.739379	0.0281053	0.489099	0.689542	0.00164896	0.0362645	0.704365	0.00293229	0.0288481	0.725694	0.0553844	0.692287	0.675926	0.000590942	0.0803641	0.750794	0.00188625	0.0588942	0.772222	0.0149023	0.407539	0.722222	>	7.66008	39	23	3	28	0.928571	0.45098	0.58209	0.884615	0.666667	4.92086e-05	0
LOC100132741	3.39209	3.51718	3.16152	3.15643	-0.27245	-0.267356	-0.360755	-0.355661	0.000273141	0.00952924	0.703548	0.00493999	0.0341832	0.691993	0.00784537	0.425064	0.718954	0.0035365	0.0555367	0.650132	0.0243606	0.113703	0.644676	0.0302314	0.642248	0.657407	3.66616e-05	0.037114	0.831746	0.000979606	0.0470424	0.805556	0.000366449	0.316797	0.866667	<	3.47789	39	23	3	28	0.928571	0.45098	0.58209	0.884615	0.666667	4.92086e-05	0
VPS72	8.51935	8.38587	8.8566	8.75449	0.274404	0.376514	0.368622	0.470731	5.08742e-06	0.00114199	0.756303	1.96355e-05	0.000788219	0.775327	0.00261707	0.387853	0.730937	0.000151176	0.00971754	0.73545	0.000241191	0.00543932	0.755787	0.011084	0.581574	0.708333	9.82456e-05	0.0516849	0.806349	0.000212591	0.028145	0.822222	0.00276823	0.347555	0.785185	>	8.86006	20	46	22	5	0.47619	0.901961	0.8	0.676471	0.709677	5.09483e-05	0
RBM8A	7.58623	7.51899	7.93365	7.72355	0.157096	0.367201	0.204553	0.414659	0.000252854	0.0091242	0.72409	1.91913e-05	0.000776624	0.801471	0.0996288	0.602796	0.620915	0.00239576	0.0447187	0.712963	0.000217681	0.00507779	0.788194	0.190044	0.791204	0.612654	0.00428461	0.139793	0.750794	0.000365382	0.0348327	0.833333	0.112877	0.563284	0.640741	>	7.89456	20	46	22	5	0.47619	0.901961	0.8	0.676471	0.709677	5.09483e-05	0
PSMA1	10.999	10.9388	11.3297	11.2138	0.232558	0.348466	0.275026	0.390935	0.000167369	0.00708873	0.719888	0.000269668	0.00468527	0.749183	0.013584	0.447072	0.680828	0.000889977	0.0253625	0.703042	0.000900584	0.0133261	0.733796	0.0212332	0.620524	0.662037	0.00689847	0.16398	0.760317	0.0081424	0.104477	0.786111	0.0435354	0.48508	0.725926	>	11.3089	20	46	22	5	0.47619	0.901961	0.8	0.676471	0.709677	5.09483e-05	0
RNF41	6.8422	6.82215	7.19555	6.98568	0.149373	0.359248	0.163524	0.3734	0.000112668	0.00579007	0.711018	1.53149e-05	0.000665094	0.762255	0.0712722	0.569823	0.642702	0.000982098	0.0267481	0.70172	0.000182373	0.00452539	0.752315	0.124958	0.746788	0.634259	0.00491248	0.145274	0.733333	0.000744855	0.0429103	0.786111	0.0956335	0.542422	0.662963	>	7.12176	20	46	22	5	0.47619	0.901961	0.8	0.676471	0.709677	5.09483e-05	0
FAM193A	6.84495	6.80954	7.31453	6.97459	0.140057	0.479998	0.165046	0.504987	0.000429856	0.0122415	0.706816	1.56389e-05	0.000676702	0.788399	0.175483	0.68476	0.598039	0.00238598	0.0446241	0.705026	0.000127725	0.00361152	0.787037	0.24095	0.815742	0.595679	0.0186394	0.228847	0.711111	0.00295987	0.0683265	0.791667	0.256538	0.690915	0.603704	>	7.19078	20	46	22	5	0.47619	0.901961	0.8	0.676471	0.709677	5.09483e-05	0
NUP133	7.1773	7.14659	7.47237	7.31447	0.146195	0.304098	0.167873	0.325776	0.000656515	0.0156126	0.69888	9.88543e-05	0.00241885	0.771242	0.10387	0.6084	0.602397	0.00265996	0.0474809	0.689153	0.000327357	0.00666638	0.758102	0.149615	0.772307	0.597222	0.015493	0.21405	0.722222	0.00296448	0.0683541	0.802778	0.193513	0.640492	0.614815	>	7.49886	20	46	22	5	0.47619	0.901961	0.8	0.676471	0.709677	5.09483e-05	0
C1orf96	4.96095	4.98611	5.35989	5.08164	0.113287	0.391531	0.0955279	0.373772	0.00035105	0.010989	0.696078	1.46389e-05	0.000644356	0.781863	0.197395	0.7058	0.581699	0.001011	0.0271288	0.699735	5.73709e-05	0.00211216	0.78588	0.198032	0.799681	0.584877	0.0288183	0.263664	0.687302	0.00381574	0.0754455	0.772222	0.409413	0.780375	0.574074	>	5.29359	20	46	22	5	0.47619	0.901961	0.8	0.676471	0.709677	5.09483e-05	0
DDX5	9.70983	9.71867	10.0575	9.75621	0.0437735	0.345064	0.0375395	0.33883	0.00110279	0.0213415	0.679272	3.96404e-06	0.00026717	0.810458	0.582601	0.895374	0.504357	0.00466853	0.06605	0.675265	5.86457e-05	0.00214723	0.793981	0.615861	0.942485	0.516975	0.0283058	0.263083	0.688889	0.000252546	0.0291757	0.85	0.694601	0.909349	0.525926	>	10.0045	20	46	22	5	0.47619	0.901961	0.8	0.676471	0.709677	5.09483e-05	0
AADAT	5.01515	5.28912	5.65413	5.26313	0.167409	0.558408	-0.0259831	0.365015	0.00211382	0.0315119	0.670401	8.52557e-05	0.00216562	0.781863	0.23825	0.735407	0.521786	0.00106531	0.0279676	0.703704	4.97907e-05	0.00193275	0.813657	0.103505	0.734793	0.557099	0.340173	0.672309	0.590476	0.090681	0.326161	0.705556	0.902619	0.975021	0.562963	>	5.53549	20	46	22	5	0.47619	0.901961	0.8	0.676471	0.709677	5.09483e-05	0
ZNF766	7.79662	7.88548	8.32448	7.82	-0.00275067	0.501726	-0.0654725	0.439004	0.00375108	0.0437501	0.669935	1.39063e-06	0.000130517	0.843137	0.981653	0.994835	0.561002	0.00643705	0.0784933	0.675265	8.6774e-06	0.000580167	0.835648	0.864297	0.984622	0.53858	0.136672	0.470314	0.657143	0.000743151	0.0429103	0.861111	0.686846	0.907265	0.614815	>	8.23609	20	46	22	5	0.47619	0.901961	0.8	0.676471	0.709677	5.09483e-05	0
C11orf30	5.09523	5.00799	5.41821	5.0691	-0.000473127	0.348643	0.0611039	0.41022	0.0024105	0.0340795	0.6676	7.84951e-06	0.000418452	0.778595	0.9944	0.99798	0.519608	0.0197949	0.144237	0.647487	0.000205324	0.00488066	0.762731	0.721694	0.964771	0.506173	0.011936	0.192241	0.715873	0.000423324	0.0361419	0.816667	0.454608	0.804481	0.581481	>	5.3317	20	46	22	5	0.47619	0.901961	0.8	0.676471	0.709677	5.09483e-05	0
PIK3C3	4.38292	4.30187	4.52131	4.40776	0.0486834	0.162226	0.105891	0.219434	0.00912084	0.0735221	0.646125	0.00100543	0.0114267	0.743464	0.3536	0.800817	0.51634	0.0736045	0.292783	0.617725	0.0135498	0.0785871	0.71412	0.678214	0.956154	0.510802	0.0114578	0.188953	0.714286	0.00181537	0.0579731	0.813889	0.133743	0.585814	0.581481	>	4.50428	20	46	22	5	0.47619	0.901961	0.8	0.676471	0.709677	5.09483e-05	0
PLEC	7.69215	7.655	6.92889	7.3505	-0.330727	-0.752336	-0.304505	-0.726114	1.11513e-05	0.00169026	0.746499	2.8819e-06	0.00021626	0.80719	0.0278692	0.487435	0.665577	3.42611e-05	0.0041763	0.765212	8.23077e-06	0.000565434	0.824074	0.0238755	0.626662	0.686728	0.00511903	0.146042	0.701587	0.00170367	0.0567635	0.766667	0.114907	0.565095	0.614815	<	7.14679	20	46	22	5	0.47619	0.901961	0.8	0.676471	0.709677	5.09483e-05	0
CRCT1	5.20516	4.38363	3.47321	4.79723	-0.166309	-1.49033	0.413594	-0.910427	0.00561559	0.0554103	0.708217	0.000113886	0.00262127	0.835784	0.724571	0.934093	0.538126	0.00167443	0.03644	0.74537	3.6757e-05	0.00154697	0.87037	0.428366	0.897608	0.578704	0.381763	0.702617	0.619048	0.00427812	0.0797054	0.752778	0.426409	0.789209	0.559259	<	3.38485	20	46	22	5	0.47619	0.901961	0.8	0.676471	0.709677	5.09483e-05	0
ABHD6	5.29376	5.03411	4.6467	5.18786	-0.0295258	-0.570689	0.153753	-0.38741	0.00074468	0.0167156	0.698413	7.17798e-07	8.24684e-05	0.845588	0.815655	0.959121	0.502179	0.000167542	0.0101443	0.736772	1.26161e-07	4.10444e-05	0.877315	0.421386	0.895928	0.549383	0.267265	0.612948	0.606349	0.00339749	0.0721226	0.769444	0.329992	0.73626	0.611111	<	4.7152	20	46	22	5	0.47619	0.901961	0.8	0.676471	0.709677	5.09483e-05	0
MYD88	9.44381	9.33956	9.04646	9.25069	-0.162458	-0.366689	-0.0888726	-0.293103	0.000425803	0.0121777	0.694211	6.90237e-05	0.00184977	0.762255	0.0859178	0.587167	0.603486	0.000737898	0.023013	0.707672	0.00017594	0.00446914	0.771991	0.0731461	0.70709	0.621914	0.0748636	0.372717	0.661905	0.0158328	0.143445	0.738889	0.44458	0.79863	0.559259	<	9.04919	20	46	22	5	0.47619	0.901961	0.8	0.676471	0.709677	5.09483e-05	0
DHRS9	7.16682	6.86707	6.00795	6.97929	-0.0993728	-1.07071	0.112218	-0.859118	0.0086045	0.0709623	0.662932	0.000173686	0.00344461	0.763889	0.7445	0.938459	0.528322	0.00631316	0.0775971	0.685185	0.000117793	0.00340448	0.783565	0.550625	0.926198	0.554012	0.248634	0.597003	0.609524	0.0316537	0.195849	0.716667	0.792313	0.943142	0.533333	<	5.94224	20	46	22	5	0.47619	0.901961	0.8	0.676471	0.709677	5.09483e-05	0
SH3D20	4.45511	4.52613	3.9818	4.49781	0.0218147	-0.494193	-0.028318	-0.544326	0.118784	0.326047	0.658263	0.0180267	0.0816614	0.792484	0.914349	0.982703	0.520697	0.20335	0.490964	0.64418	0.042651	0.16281	0.773148	0.847114	0.982229	0.527778	0.22386	0.572788	0.692063	0.0677627	0.281967	0.838889	0.909706	0.976508	0.503704	<	3.79811	20	46	22	5	0.47619	0.901961	0.8	0.676471	0.709677	5.09483e-05	0
ASPHD1	5.18628	5.33234	4.97371	5.32518	0.0959398	-0.25553	-0.00716104	-0.358631	0.261361	0.507647	0.641457	0.00919076	0.0520488	0.73366	0.432173	0.840043	0.518519	0.521386	0.765182	0.62963	0.0188918	0.0975404	0.724537	0.24523	0.818321	0.503086	0.187467	0.534998	0.669841	0.0212603	0.162546	0.755556	0.971073	0.992309	0.555556	<	4.91999	20	46	22	5	0.47619	0.901961	0.8	0.676471	0.709677	5.09483e-05	0
DIO2	5.83339	5.88336	5.5704	5.43937	-0.408721	-0.277693	-0.443993	-0.312965	0.0245159	0.130797	0.633987	0.11634	0.278901	0.601307	0.0221964	0.469558	0.67756	0.0545872	0.248998	0.632937	0.177924	0.395399	0.59838	0.0402477	0.668537	0.679012	0.101979	0.421459	0.636508	0.220997	0.500674	0.608333	0.0545448	0.493173	0.674074	<	5.23404	20	46	22	5	0.47619	0.901961	0.8	0.676471	0.709677	5.09483e-05	0
SETDB1	6.11923	6.02466	6.42289	6.25828	0.166868	0.331481	0.233626	0.39824	1.11607e-05	0.00169026	0.753035	2.22062e-06	0.00018344	0.816993	0.0248979	0.480692	0.667756	0.000260336	0.0126936	0.732804	3.40129e-05	0.00146698	0.803241	0.0716336	0.703845	0.638889	0.000262833	0.0665101	0.801587	6.04311e-05	0.0170152	0.85	0.0221537	0.425024	0.737037	>	6.13877	33	33	9	18	0.785714	0.647059	0.647059	0.785714	0.709677	5.37476e-05	0
LOC285178	4.23586	4.22875	4.43119	4.33645	0.102681	0.197421	0.107703	0.202443	0.000172857	0.00719913	0.729225	4.14883e-05	0.00128389	0.795752	0.0582798	0.550083	0.640523	0.000639358	0.0210221	0.732804	0.000115526	0.00336168	0.806713	0.077797	0.709954	0.634259	0.011077	0.186599	0.720635	0.00298721	0.0685665	0.769444	0.165045	0.618287	0.655556	>	4.27481	33	33	9	18	0.785714	0.647059	0.647059	0.785714	0.709677	5.37476e-05	0
KLHL32	2.28578	2.31384	2.46127	2.36093	0.0669013	0.167244	0.0470944	0.147437	0.000825779	0.0178081	0.718487	0.000357986	0.00568879	0.748366	0.0290046	0.489406	0.678649	0.00209762	0.0416421	0.737434	0.00120554	0.0163722	0.769676	0.0239806	0.626662	0.694444	0.0993757	0.417878	0.673016	0.062629	0.272673	0.697222	0.281573	0.708755	0.640741	>	2.32915	33	33	9	18	0.785714	0.647059	0.647059	0.785714	0.709677	5.37476e-05	0
C19orf54	6.97841	6.83645	7.19814	7.04218	0.105522	0.261486	0.205727	0.361691	0.0458541	0.188887	0.701681	0.0285659	0.111015	0.743464	0.437849	0.843092	0.645969	0.162141	0.440583	0.683862	0.0975487	0.275554	0.728009	0.673843	0.955443	0.625	0.010332	0.182767	0.744444	0.00319665	0.0703016	0.780556	0.130328	0.584299	0.696296	>	6.92355	33	33	9	18	0.785714	0.647059	0.647059	0.785714	0.709677	5.37476e-05	0
RPS18	13.7282	13.8082	13.8719	13.8435	0.0917568	0.120204	0.0352447	0.0636919	0.00226613	0.0327168	0.697012	0.00453281	0.0321684	0.721405	0.0549074	0.546421	0.664488	0.000285875	0.0132577	0.751323	0.000561019	0.00960575	0.777778	0.0129103	0.584174	0.716049	0.336598	0.669413	0.566667	0.29765	0.574398	0.586111	0.6094	0.873972	0.540741	>	13.7857	33	33	9	18	0.785714	0.647059	0.647059	0.785714	0.709677	5.37476e-05	0
C2orf49	6.47045	6.24707	6.73558	6.57448	0.169726	0.330831	0.327407	0.488512	0.00198091	0.0302754	0.694678	0.0018653	0.0175232	0.721405	0.103149	0.607032	0.659041	0.0278225	0.172749	0.658069	0.016407	0.0892174	0.6875	0.313496	0.85232	0.618827	0.000716373	0.084786	0.78254	0.00121508	0.0503957	0.802778	0.0098762	0.393563	0.755556	>	6.44822	33	33	9	18	0.785714	0.647059	0.647059	0.785714	0.709677	5.37476e-05	0
VDR	5.91858	6.07627	5.62088	5.69863	-0.266327	-0.34408	-0.377635	-0.455387	0.00109593	0.0212912	0.688142	0.00262885	0.0221838	0.706699	0.0369658	0.505664	0.663399	0.0100727	0.100863	0.659392	0.0139631	0.0801655	0.678241	0.102477	0.734793	0.634259	0.00137358	0.100528	0.757143	0.00181478	0.0579731	0.775	0.0168017	0.410113	0.733333	<	5.91678	33	33	9	18	0.785714	0.647059	0.647059	0.785714	0.709677	5.37476e-05	0
DCTPP1	9.57634	9.40775	9.83046	9.73805	0.211297	0.303705	0.330303	0.42271	0.00477794	0.0506095	0.678338	0.00743234	0.0449289	0.715686	0.104314	0.60901	0.62854	0.0285261	0.175135	0.651455	0.0280761	0.124616	0.688657	0.224518	0.813349	0.601852	0.00264459	0.120084	0.742857	0.00295114	0.0682037	0.780556	0.0421617	0.484297	0.692593	>	9.57396	33	33	9	18	0.785714	0.647059	0.647059	0.785714	0.709677	5.37476e-05	0
MCM3	9.11253	9.11267	9.77393	9.42262	0.310049	0.661361	0.309947	0.66126	2.92607e-05	0.00273342	0.739963	9.59813e-06	0.000482101	0.79085	0.0387489	0.509742	0.672113	0.000128684	0.00872038	0.742725	3.83188e-05	0.00158599	0.792824	0.0482003	0.677709	0.675926	0.00350051	0.132035	0.733333	0.00103631	0.0477346	0.786111	0.0925592	0.539813	0.662963	>	8.8371	41	18	1	33	0.97619	0.352941	0.554054	0.947368	0.634409	5.43862e-05	0
VSIG2	5.60526	5.66114	5.34486	5.36107	-0.260623	-0.276834	-0.300068	-0.316279	0.000404754	0.0120887	0.711951	0.00415449	0.0303332	0.715686	0.0123002	0.443067	0.706972	0.00278684	0.0492622	0.672619	0.0149307	0.0840314	0.678241	0.0325594	0.651192	0.665123	0.000566443	0.0797171	0.806349	0.00326634	0.0709754	0.805556	0.00294393	0.347555	0.807407	<	5.78718	41	18	1	33	0.97619	0.352941	0.554054	0.947368	0.634409	5.43862e-05	0
EXOSC8	8.28572	8.00231	8.46021	8.52438	0.322019	0.257848	0.522074	0.457903	0.0150052	0.0982539	0.701214	0.0697499	0.200025	0.698529	0.0525143	0.543663	0.704793	0.125469	0.384496	0.655423	0.27154	0.504621	0.65162	0.198415	0.799701	0.660494	0.000338952	0.0740502	0.811111	0.000915382	0.0456797	0.811111	0.00163948	0.317632	0.811111	>	7.89337	41	18	1	33	0.97619	0.352941	0.554054	0.947368	0.634409	5.43862e-05	0
CEP76	7.38945	7.07275	7.73429	7.73125	0.434947	0.437984	0.658502	0.661539	0.00122274	0.0225497	0.68254	0.00722006	0.043938	0.691176	0.0180323	0.459215	0.671024	0.0147454	0.123486	0.655423	0.0377618	0.150171	0.66088	0.0664069	0.703845	0.648148	0.000493378	0.0797171	0.747619	0.00189088	0.0588942	0.763889	0.00504114	0.36884	0.725926	>	6.93037	41	18	1	33	0.97619	0.352941	0.554054	0.947368	0.634409	5.43862e-05	0
KIAA1486	2.82623	2.82833	2.7004	2.76987	-0.0569816	-0.126447	-0.058461	-0.127926	0.00481065	0.0506095	0.655929	0.0029517	0.0240945	0.704248	0.229215	0.72509	0.591503	0.0104069	0.10288	0.641534	0.00617971	0.0474678	0.690972	0.268627	0.830089	0.575617	0.0272469	0.260619	0.690476	0.0123863	0.127768	0.736111	0.290065	0.715657	0.62963	<	2.94244	41	18	1	33	0.97619	0.352941	0.554054	0.947368	0.634409	5.43862e-05	0
CEP70	5.92751	5.96085	6.408	6.03755	0.100229	0.470684	0.0766968	0.447152	0.0119953	0.0860898	0.635854	0.00257868	0.0219084	0.698529	0.549341	0.884352	0.552288	0.0145193	0.122316	0.647487	0.00323153	0.0307333	0.708333	0.520734	0.921849	0.566358	0.071214	0.364154	0.607937	0.0173528	0.149012	0.675	0.680884	0.904182	0.518519	>	5.54028	41	18	1	33	0.97619	0.352941	0.554054	0.947368	0.634409	5.43862e-05	0
GPR116	7.13389	7.68857	6.81265	7.08252	-0.214517	-0.484383	-0.606052	-0.875917	0.0403547	0.175758	0.608777	0.0291333	0.112581	0.646242	0.393862	0.820919	0.558824	0.270492	0.560745	0.550926	0.153017	0.361956	0.58912	0.840633	0.981492	0.5	0.00110995	0.0944213	0.747619	0.000936626	0.0464618	0.783333	0.0364057	0.468376	0.7	<	7.86112	41	18	1	33	0.97619	0.352941	0.554054	0.947368	0.634409	5.43862e-05	0
P2RX1	5.62603	5.75455	5.39356	5.40892	-0.254907	-0.270272	-0.345629	-0.360993	1.58741e-05	0.00209692	0.745565	0.000208533	0.00390701	0.751634	0.00231656	0.387853	0.737473	0.000436346	0.0167107	0.712963	0.00189247	0.0217143	0.716435	0.0117855	0.583792	0.708333	3.69873e-05	0.037114	0.82381	0.00014828	0.0253667	0.836111	0.00157655	0.317632	0.807407	<	5.5996	34	31	8	20	0.809524	0.607843	0.62963	0.794872	0.698925	5.49476e-05	0
BUB1	4.56321	4.57205	4.92539	4.75385	0.188038	0.35958	0.181798	0.35334	2.27826e-05	0.00238454	0.738562	2.26378e-05	0.000852264	0.772059	0.0154991	0.447072	0.6939	8.13569e-05	0.00682275	0.746693	7.12527e-05	0.00242247	0.778935	0.0151701	0.599758	0.703704	0.00566054	0.152301	0.719048	0.00435763	0.080586	0.755556	0.0634023	0.501337	0.67037	>	4.59762	34	31	8	20	0.809524	0.607843	0.62963	0.794872	0.698925	5.49476e-05	0
CARD6	7.70908	7.62937	6.83114	7.20942	-0.476213	-0.854489	-0.419947	-0.798224	6.76361e-05	0.0043337	0.736695	4.6665e-05	0.00140283	0.786765	0.0318765	0.4945	0.669935	0.000270999	0.0129606	0.73082	0.000189421	0.00464628	0.778935	0.0429457	0.668977	0.666667	0.0058045	0.153692	0.750794	0.00157999	0.0556031	0.805556	0.088204	0.535415	0.677778	<	7.67738	34	31	8	20	0.809524	0.607843	0.62963	0.794872	0.698925	5.49476e-05	0
ZNF3	4.28122	4.23399	4.5624	4.32747	0.060141	0.295067	0.0934821	0.328408	0.000260118	0.00927925	0.722222	4.54742e-06	0.000294199	0.827614	0.3034	0.772023	0.581699	0.00260289	0.0468088	0.719577	8.43615e-05	0.00268975	0.821759	0.465328	0.906723	0.583333	0.00514261	0.146042	0.728571	0.000416795	0.0361419	0.841667	0.191306	0.639532	0.577778	>	4.25478	34	31	8	20	0.809524	0.607843	0.62963	0.794872	0.698925	5.49476e-05	0
SNRNP48	6.07881	6.53901	6.91371	6.36185	0.147687	0.699548	-0.177157	0.374704	0.000355898	0.011063	0.718954	7.07477e-06	0.000391778	0.808007	0.326337	0.782863	0.600218	7.49285e-06	0.00245534	0.779762	6.14697e-08	2.5566e-05	0.869213	0.030946	0.642525	0.660494	0.493367	0.773612	0.573016	0.0980232	0.338118	0.661111	0.41381	0.783082	0.544444	>	6.18528	34	31	8	20	0.809524	0.607843	0.62963	0.794872	0.698925	5.49476e-05	0
SQRDL	10.1927	10.0543	9.36552	9.94574	-0.206267	-0.786487	-0.10861	-0.688831	0.000155686	0.00680467	0.715219	2.028e-06	0.000172518	0.79902	0.211098	0.716975	0.603486	0.000335056	0.0143428	0.728836	7.63594e-06	0.000533741	0.803241	0.171744	0.784101	0.62963	0.0377975	0.287961	0.68254	0.00207586	0.0602301	0.788889	0.604499	0.871415	0.540741	<	10.163	34	31	8	20	0.809524	0.607843	0.62963	0.794872	0.698925	5.49476e-05	0
EPHA2	7.58732	7.36835	6.66102	7.17042	-0.352495	-0.861893	-0.197927	-0.707324	0.000129176	0.00620757	0.709617	3.34294e-05	0.00111567	0.761438	0.0711657	0.569823	0.640523	9.3885e-05	0.00721867	0.738757	2.62755e-05	0.00122441	0.788194	0.0313303	0.644689	0.67284	0.0523396	0.32434	0.639683	0.0178346	0.150945	0.697222	0.432205	0.791586	0.562963	<	7.4191	34	31	8	20	0.809524	0.607843	0.62963	0.794872	0.698925	5.49476e-05	0
MUTYH	7.1414	7.22542	7.62477	7.44281	0.276703	0.458657	0.217398	0.399351	0.0001972	0.00785303	0.721755	0.000324391	0.00530245	0.722222	0.0173356	0.453462	0.721133	0.000594817	0.0201542	0.733466	0.000999236	0.0143917	0.739583	0.0218149	0.620524	0.725309	0.025369	0.253431	0.693651	0.0203483	0.159139	0.680556	0.0651484	0.50403	0.711111	>	7.45278	24	43	18	8	0.571429	0.843137	0.75	0.704918	0.72043	5.50944e-05	0
HAUS3	6.74692	6.70913	7.09139	6.85646	0.120656	0.355584	0.147331	0.382259	0.00387362	0.0444532	0.672269	0.000263705	0.00461219	0.755719	0.30169	0.770092	0.561002	0.015696	0.127552	0.66336	0.00163709	0.0196796	0.744213	0.408594	0.890558	0.555556	0.0256117	0.253718	0.693651	0.00106272	0.0482527	0.783333	0.329266	0.736199	0.574074	>	7.03757	24	43	18	8	0.571429	0.843137	0.75	0.704918	0.72043	5.50944e-05	0
CUEDC2	8.79056	8.79911	9.10689	8.86472	0.071644	0.31381	0.0656069	0.307773	0.00507843	0.0523584	0.665733	0.00016767	0.00336872	0.716503	0.403709	0.825754	0.598039	0.0119729	0.110861	0.657407	0.000569145	0.00968609	0.704861	0.425186	0.89737	0.594136	0.0982525	0.415872	0.685714	0.0170388	0.147984	0.744444	0.613611	0.875828	0.607407	>	8.96124	24	43	18	8	0.571429	0.843137	0.75	0.704918	0.72043	5.50944e-05	0
SNX33	6.36934	6.37651	6.04584	6.31531	-0.0561342	-0.325607	-0.0611938	-0.330666	0.000582095	0.0146567	0.713352	1.99246e-06	0.000171686	0.828431	0.44967	0.847377	0.559913	0.00132837	0.0318306	0.722884	2.44661e-06	0.000252115	0.837963	0.462231	0.906723	0.569444	0.03112	0.270841	0.690476	0.00156505	0.0556031	0.805556	0.5951	0.867418	0.537037	<	6.15708	24	43	18	8	0.571429	0.843137	0.75	0.704918	0.72043	5.50944e-05	0
ZNF831	3.12415	3.20055	3.03607	3.12073	-0.0258885	-0.110548	-0.07982	-0.164479	0.165666	0.393852	0.696078	0.02122	0.0910126	0.70915	0.72049	0.933027	0.678649	0.398853	0.678952	0.667328	0.0920984	0.265628	0.678241	0.966882	0.997793	0.652778	0.15823	0.49806	0.765079	0.022252	0.165778	0.783333	0.503823	0.829374	0.740741	<	2.98342	24	43	18	8	0.571429	0.843137	0.75	0.704918	0.72043	5.50944e-05	0
CD36	4.99437	4.76682	4.42334	4.55123	-0.376214	-0.504104	-0.215593	-0.343483	0.00389498	0.044545	0.69141	0.00614565	0.0394154	0.737745	0.0731126	0.570935	0.62963	0.00293298	0.0505895	0.71627	0.00460425	0.0387389	0.768519	0.0533416	0.691419	0.646605	0.163108	0.5035	0.631746	0.112395	0.363	0.663889	0.384811	0.766923	0.588889	<	4.70579	32	34	10	17	0.761905	0.666667	0.653061	0.772727	0.709677	5.8622e-05	0
WDR35	5.30671	5.36085	5.87629	5.47325	0.150618	0.553658	0.112398	0.515438	0.000139223	0.00642066	0.730626	5.67375e-07	6.79185e-05	0.808824	0.169716	0.67896	0.626362	0.000463406	0.0171873	0.742725	3.37111e-06	0.000307385	0.818287	0.16235	0.781269	0.641975	0.0373651	0.286963	0.701587	0.00249483	0.0636323	0.786111	0.502252	0.828494	0.588889	>	5.37418	32	34	10	17	0.761905	0.666667	0.653061	0.772727	0.709677	5.8622e-05	0
IRF2BP2	8.62408	8.58306	8.87643	8.75952	0.147505	0.264417	0.17646	0.293372	0.00021566	0.00834392	0.727358	0.000157412	0.00321762	0.772059	0.0338269	0.499202	0.667756	0.00175971	0.0373234	0.706349	0.00107921	0.0151417	0.752315	0.0715368	0.703845	0.645062	0.00483361	0.144918	0.777778	0.00305478	0.0693169	0.819444	0.0458786	0.485421	0.722222	>	8.66495	32	34	10	17	0.761905	0.666667	0.653061	0.772727	0.709677	5.8622e-05	0
LIN9	3.32295	3.28052	3.47075	3.44587	0.135395	0.160276	0.165345	0.190225	0.000149188	0.00665718	0.72549	0.000972907	0.0111971	0.736928	0.00925895	0.427184	0.71024	0.000981585	0.0267481	0.706349	0.00338486	0.0316496	0.717593	0.0199947	0.620524	0.691358	0.00176695	0.108232	0.771429	0.00525259	0.0860165	0.783333	0.0165884	0.409665	0.755556	>	3.35672	32	34	10	17	0.761905	0.666667	0.653061	0.772727	0.709677	5.8622e-05	0
TROVE2	6.90456	6.92308	7.21661	7.05251	0.142501	0.306603	0.129431	0.293533	0.000443477	0.0124653	0.722689	0.000323636	0.00529877	0.744281	0.0393109	0.51044	0.6939	0.00160974	0.035756	0.722222	0.00127229	0.0168836	0.746528	0.0485191	0.677709	0.689815	0.0296437	0.265386	0.72381	0.0213573	0.162976	0.738889	0.0932124	0.539813	0.703704	>	6.95031	32	34	10	17	0.761905	0.666667	0.653061	0.772727	0.709677	5.8622e-05	0
PLAG1	4.87184	4.75939	5.92918	5.19972	0.360955	1.09042	0.440326	1.16979	0.000518311	0.0135978	0.712885	2.7886e-05	0.000995479	0.785948	0.211602	0.717334	0.615468	0.00255948	0.0463465	0.704365	0.000154528	0.00409705	0.775463	0.291474	0.841936	0.609568	0.00754843	0.16931	0.733333	0.000425725	0.0361419	0.811111	0.232275	0.671423	0.62963	>	4.90344	32	34	10	17	0.761905	0.666667	0.653061	0.772727	0.709677	5.8622e-05	0
NFYB	6.65061	6.65294	6.87689	6.78454	0.133248	0.225593	0.131598	0.223943	0.0136814	0.0933655	0.665733	0.0145011	0.0700559	0.702614	0.204077	0.711122	0.616558	0.02504	0.162524	0.666005	0.0244911	0.11402	0.704861	0.241084	0.815742	0.614198	0.0491862	0.318317	0.665079	0.0290775	0.187806	0.697222	0.254078	0.689811	0.622222	>	6.74095	32	34	10	17	0.761905	0.666667	0.653061	0.772727	0.709677	5.8622e-05	0
ENDOD1	7.56309	7.29243	6.81559	7.13406	-0.349416	-0.667893	-0.158362	-0.476839	0.000206701	0.00811295	0.70775	7.29149e-05	0.00193238	0.776144	0.0359627	0.505555	0.616558	0.000174785	0.0103388	0.73545	7.63511e-05	0.00253123	0.797454	0.0186872	0.618488	0.652778	0.11249	0.437659	0.64127	0.0420779	0.223981	0.725	0.458617	0.806744	0.52963	<	6.79237	19	47	23	4	0.452381	0.921569	0.826087	0.671429	0.709677	6.11327e-05	0
LOC100289378	4.80123	4.87526	4.76063	4.59985	-0.223152	-0.0623699	-0.275409	-0.114627	0.0103002	0.0789982	0.700747	0.284108	0.486685	0.642974	0.000152917	0.378067	0.777778	0.0566844	0.254045	0.680556	0.529192	0.730903	0.622685	0.00137372	0.581574	0.757716	0.028319	0.263083	0.749206	0.209231	0.486364	0.691667	0.00125824	0.316797	0.825926	<	4.62337	19	47	23	4	0.452381	0.921569	0.826087	0.671429	0.709677	6.11327e-05	0
LGI4	5.06254	5.05754	4.96164	4.93989	-0.121177	-0.0994264	-0.117641	-0.0958909	0.0047832	0.0506095	0.669001	0.0364855	0.130061	0.651144	0.0145436	0.447072	0.69281	0.0089584	0.0944961	0.672619	0.0497604	0.179657	0.652778	0.019017	0.620524	0.699074	0.0587378	0.339864	0.660317	0.147069	0.41206	0.647222	0.0591945	0.499611	0.677778	<	4.87752	19	47	23	4	0.452381	0.921569	0.826087	0.671429	0.709677	6.11327e-05	0
RPS7	12.8836	12.9427	13.0845	13.0681	0.167128	0.183537	0.125419	0.141828	0.00010569	0.00552197	0.74183	0.000982073	0.0112443	0.752451	0.00547308	0.410689	0.727669	2.93945e-05	0.00384069	0.773148	0.000266445	0.00584623	0.782407	0.00136031	0.581574	0.760802	0.0482082	0.315907	0.666667	0.080303	0.308001	0.680556	0.138969	0.590887	0.648148	>	13.1568	19	47	23	4	0.452381	0.921569	0.826087	0.671429	0.709677	6.11327e-05	0
TMSB15B	4.19987	4.38842	5.18399	4.36101	0.105686	0.928666	-0.027409	0.795571	0.00051978	0.0136185	0.685341	2.4832e-07	4.10119e-05	0.828431	0.568532	0.891972	0.505447	0.00112245	0.0288417	0.697751	2.2004e-06	0.000235231	0.827546	0.449095	0.903141	0.524691	0.0876386	0.398903	0.655556	0.00123503	0.0506966	0.830556	0.914141	0.977115	0.577778	>	4.98855	19	47	23	4	0.452381	0.921569	0.826087	0.671429	0.709677	6.11327e-05	0
INSM1	3.37382	3.11836	4.55865	3.72375	0.425066	1.25997	0.605388	1.44029	0.00253592	0.0350412	0.651727	0.000466522	0.00681743	0.715686	0.0946091	0.595357	0.566449	0.018935	0.14156	0.642857	0.00518019	0.0420111	0.706019	0.242209	0.816641	0.558642	0.0317537	0.27166	0.673016	0.0154	0.141156	0.738889	0.0740908	0.52002	0.585185	>	3.55754	19	47	23	4	0.452381	0.921569	0.826087	0.671429	0.709677	6.11327e-05	0
FHOD3	5.00348	5.3473	6.44266	5.04227	-0.0623265	1.33806	-0.305022	1.09536	0.0105117	0.0798337	0.603875	2.9648e-05	0.00102365	0.732843	0.836104	0.964383	0.568083	0.00896699	0.0944961	0.62004	3.05587e-05	0.00136385	0.747685	0.89888	0.98739	0.550154	0.314334	0.651459	0.565079	0.0342494	0.203411	0.697222	0.527393	0.839286	0.611111	>	6.42841	19	47	23	4	0.452381	0.921569	0.826087	0.671429	0.709677	6.11327e-05	0
PRKCD	7.34629	7.41302	6.80205	7.1816	-0.184314	-0.563863	-0.231416	-0.610965	7.07935e-06	0.00132916	0.751167	1.40306e-07	3.27381e-05	0.835784	0.059321	0.551003	0.638344	0.00018816	0.0106257	0.726852	7.35795e-06	0.000521606	0.811343	0.133712	0.758657	0.614198	0.000736079	0.0852437	0.809524	3.88449e-05	0.0146075	0.894444	0.0411477	0.481912	0.696296	<	7.4345	37	26	5	25	0.880952	0.509804	0.596774	0.83871	0.677419	6.37507e-05	0
HBS1L	5.34979	5.43632	5.80965	5.55267	0.177433	0.434406	0.116354	0.373327	2.38396e-05	0.00245658	0.737162	5.54261e-06	0.000336785	0.787582	0.0393812	0.51044	0.669935	4.93536e-05	0.00508571	0.756614	1.58934e-05	0.000882568	0.802083	0.0273829	0.636395	0.695988	0.0175907	0.224278	0.690476	0.00468204	0.0823207	0.752778	0.232236	0.671423	0.607407	>	5.33286	37	26	5	25	0.880952	0.509804	0.596774	0.83871	0.677419	6.37507e-05	0
TFEB	6.51777	6.67964	6.25266	6.26331	-0.302071	-0.31272	-0.416334	-0.426983	8.1984e-05	0.00474129	0.723156	0.000950653	0.0110427	0.723856	0.00252179	0.387853	0.722222	0.00302529	0.0515149	0.662698	0.0121742	0.0737985	0.663194	0.0215749	0.620524	0.662037	7.9647e-05	0.0466177	0.868254	0.000386898	0.0358291	0.869444	0.000235456	0.316797	0.866667	<	6.60785	37	26	5	25	0.880952	0.509804	0.596774	0.83871	0.677419	6.37507e-05	0
C4orf38	3.79701	3.78578	3.6796	3.6047	-0.18901	-0.114107	-0.181082	-0.106179	0.000440765	0.0124278	0.721755	0.0149536	0.0715332	0.691993	0.000942975	0.378067	0.761438	0.00089489	0.0254477	0.73082	0.0164531	0.0893304	0.702546	0.0014576	0.581574	0.768519	0.0254866	0.253431	0.7	0.0980025	0.338118	0.666667	0.0238055	0.432239	0.744444	<	3.78885	37	26	5	25	0.880952	0.509804	0.596774	0.83871	0.677419	6.37507e-05	0
KRT19P2	3.83279	3.92559	3.67525	3.74513	-0.114949	-0.184829	-0.180453	-0.250334	0.000173965	0.00723023	0.720355	0.000153228	0.00315467	0.760621	0.0267607	0.485457	0.666667	0.0047629	0.0668176	0.683201	0.00268963	0.0273062	0.728009	0.113397	0.738768	0.623457	0.000413125	0.0784806	0.809524	0.000318967	0.032533	0.838889	0.00992152	0.393563	0.77037	<	3.87823	37	26	5	25	0.880952	0.509804	0.596774	0.83871	0.677419	6.37507e-05	0
WIPI1	8.56748	8.45009	8.08396	8.31722	-0.215735	-0.448988	-0.132873	-0.366126	0.0138141	0.0937693	0.685808	0.0111914	0.0594545	0.721405	0.203594	0.711113	0.638344	0.0139696	0.120129	0.69246	0.0121719	0.0737985	0.725694	0.156733	0.776711	0.648148	0.196242	0.544532	0.669841	0.138919	0.402075	0.711111	0.507104	0.830468	0.614815	<	8.70234	37	26	5	25	0.880952	0.509804	0.596774	0.83871	0.677419	6.37507e-05	0
CREB3L1	5.85342	5.93494	5.51444	5.73525	-0.142146	-0.362956	-0.199692	-0.420502	0.014017	0.0943795	0.672269	0.00309383	0.0247593	0.714869	0.347986	0.797133	0.615468	0.038499	0.206558	0.654762	0.00764953	0.0544787	0.689815	0.462808	0.906723	0.608025	0.0387011	0.290636	0.714286	0.00620518	0.0922974	0.775	0.331762	0.737199	0.633333	<	5.8729	37	26	5	25	0.880952	0.509804	0.596774	0.83871	0.677419	6.37507e-05	0
DSCC1	6.40269	6.36392	6.65642	6.50621	0.114926	0.265133	0.142294	0.292501	0.00285818	0.0376753	0.663866	0.00168156	0.0164141	0.700163	0.180965	0.689735	0.615468	0.00952809	0.0980269	0.647487	0.0050939	0.0415981	0.679398	0.248946	0.81964	0.604938	0.0137773	0.204785	0.703175	0.00829469	0.105295	0.75	0.149299	0.600613	0.640741	>	6.37413	37	26	5	25	0.880952	0.509804	0.596774	0.83871	0.677419	6.37507e-05	0
FER1L4	4.37713	4.46041	4.22107	4.16598	-0.235648	-0.180554	-0.294432	-0.239338	0.000283525	0.00973873	0.723623	0.0107847	0.0580809	0.68219	0.00240231	0.387853	0.778867	0.00155252	0.0350592	0.706349	0.0271389	0.121752	0.664352	0.00513547	0.581574	0.762346	0.000662115	0.0832475	0.765079	0.0113681	0.122949	0.725	0.00260045	0.347555	0.818519	<	4.2806	31	35	11	16	0.738095	0.686275	0.659574	0.76087	0.709677	6.37559e-05	0
DNAJB2	7.48128	7.5287	7.29419	7.09836	-0.396866	-0.201033	-0.430334	-0.234501	0.00235984	0.0335291	0.709617	0.0636741	0.188918	0.660948	0.00155422	0.378067	0.77451	0.0117368	0.109487	0.695106	0.130203	0.328417	0.649306	0.00724065	0.581574	0.756173	0.0105769	0.183529	0.744444	0.0609327	0.269241	0.688889	0.0024642	0.342096	0.818519	<	7.39155	31	35	11	16	0.738095	0.686275	0.659574	0.76087	0.709677	6.37559e-05	0
STS	5.17025	5.27302	4.86743	4.9233	-0.277176	-0.333043	-0.349716	-0.405584	0.000661973	0.0156126	0.708217	0.00238756	0.020707	0.74183	0.0329138	0.496529	0.663399	0.00617428	0.0766647	0.671296	0.0130174	0.0767642	0.704861	0.0897262	0.724441	0.626543	0.000242866	0.0651871	0.796825	0.000119379	0.0251064	0.830556	0.00962703	0.393563	0.751852	<	5.02822	31	35	11	16	0.738095	0.686275	0.659574	0.76087	0.709677	6.37559e-05	0
IPO11	5.54296	5.58652	5.72463	5.68295	0.127172	0.168858	0.0964266	0.138113	0.00851385	0.0704908	0.704015	0.017272	0.0793211	0.708333	0.0913982	0.594085	0.698257	0.0109536	0.105276	0.712963	0.0213116	0.104412	0.712963	0.0905896	0.726716	0.712963	0.110325	0.434413	0.68254	0.111708	0.362118	0.697222	0.240936	0.678434	0.662963	>	5.57038	31	35	11	16	0.738095	0.686275	0.659574	0.76087	0.709677	6.37559e-05	0
ALMS1	6.5608	6.60975	6.96225	6.79217	0.216972	0.387054	0.182419	0.352501	0.00272589	0.036671	0.703548	0.00233867	0.0204427	0.747549	0.107731	0.611101	0.64488	0.00468564	0.0661315	0.714947	0.00388331	0.0345182	0.758102	0.111225	0.737742	0.657407	0.0536687	0.327785	0.67619	0.0304456	0.192	0.722222	0.253623	0.689534	0.614815	>	6.71703	31	35	11	16	0.738095	0.686275	0.659574	0.76087	0.709677	6.37559e-05	0
LPPR2	6.38669	6.4082	6.21787	6.27684	-0.116176	-0.175147	-0.131364	-0.190334	0.00559624	0.0553286	0.697479	0.00595879	0.0387641	0.705065	0.104402	0.60901	0.687364	0.0174121	0.135337	0.685847	0.0157326	0.08707	0.694444	0.160997	0.779297	0.674383	0.0310246	0.270705	0.725397	0.0200526	0.158467	0.730556	0.145342	0.598508	0.718519	<	6.30062	31	35	11	16	0.738095	0.686275	0.659574	0.76087	0.709677	6.37559e-05	0
FSD1L	3.24803	3.33511	3.52837	3.42829	0.154649	0.25473	0.0931815	0.193262	0.00284761	0.0376232	0.694678	0.00248336	0.0213378	0.727124	0.0679354	0.56434	0.651416	0.00233256	0.0441574	0.715608	0.00196346	0.0222893	0.748843	0.0400349	0.668537	0.671296	0.175328	0.518399	0.644444	0.123841	0.378722	0.675	0.43202	0.791586	0.603704	>	3.31563	31	35	11	16	0.738095	0.686275	0.659574	0.76087	0.709677	6.37559e-05	0
MCTP1	5.03773	4.97294	4.63752	4.79608	-0.222589	-0.381151	-0.17686	-0.335422	0.00424726	0.0472493	0.676004	0.00313761	0.0249769	0.71732	0.128389	0.637002	0.620915	0.00633651	0.0777137	0.678571	0.00444753	0.0379798	0.717593	0.129369	0.753121	0.626543	0.0748581	0.372717	0.669841	0.0333603	0.200694	0.716667	0.324004	0.73296	0.607407	<	4.92799	31	35	11	16	0.738095	0.686275	0.659574	0.76087	0.709677	6.37559e-05	0
MRPL9	8.92476	8.83239	9.20842	9.22218	0.324588	0.310828	0.389789	0.376029	3.99689e-05	0.00321253	0.732493	0.000542237	0.00756973	0.740196	0.00210244	0.387853	0.722222	0.00046289	0.0171873	0.716931	0.00251855	0.026319	0.724537	0.00741081	0.581574	0.70679	0.000476556	0.0797171	0.769841	0.00123755	0.0506966	0.777778	0.00526285	0.370307	0.759259	>	8.78823	40	20	2	31	0.952381	0.392157	0.56338	0.909091	0.645161	6.75223e-05	0
ADCY4	6.14963	6.1963	5.89245	6.0023	-0.161052	-0.2709	-0.193994	-0.303842	1.43802e-05	0.00197485	0.738562	5.08559e-06	0.000315748	0.803922	0.0213318	0.469558	0.651416	0.000118678	0.00820929	0.730159	2.02255e-05	0.00102621	0.795139	0.0418274	0.668977	0.643519	0.000756189	0.0858919	0.75873	0.000149403	0.0253667	0.825	0.0493623	0.488411	0.67037	<	6.25189	40	20	2	31	0.952381	0.392157	0.56338	0.909091	0.645161	6.75223e-05	0
SIDT1	4.69888	5.01966	4.27654	4.21433	-0.578888	-0.516682	-0.805321	-0.743115	0.00100135	0.0201591	0.680672	0.0126745	0.0642003	0.678922	0.0115221	0.442459	0.683007	0.00816663	0.0904483	0.640873	0.0447797	0.168048	0.637731	0.034255	0.651192	0.645062	0.0003804	0.0784806	0.77619	0.00418761	0.0786547	0.777778	0.00297299	0.347555	0.774074	<	5.11526	40	20	2	31	0.952381	0.392157	0.56338	0.909091	0.645161	6.75223e-05	0
CCPG1	6.80656	6.94313	6.59657	6.49386	-0.352864	-0.250161	-0.449268	-0.346566	0.0100915	0.078012	0.677871	0.0613636	0.184303	0.666667	0.0253111	0.480692	0.69281	0.032473	0.187729	0.643519	0.115526	0.304937	0.634259	0.0486341	0.677709	0.655864	0.0199294	0.232453	0.760317	0.0557442	0.257754	0.744444	0.0384922	0.473537	0.781481	<	7.11583	40	20	2	31	0.952381	0.392157	0.56338	0.909091	0.645161	6.75223e-05	0
GNAI1	8.24646	7.79073	7.60161	7.73636	-0.376054	-0.510812	-0.0543628	-0.18912	0.00918072	0.0737076	0.669468	0.0199735	0.0873721	0.669118	0.0848091	0.586902	0.669935	0.00252033	0.0459504	0.723545	0.00808876	0.056556	0.721065	0.0297557	0.64222	0.726852	0.559562	0.812086	0.539683	0.48546	0.728919	0.544444	0.797447	0.944379	0.533333	<	8.48413	40	20	2	31	0.952381	0.392157	0.56338	0.909091	0.645161	6.75223e-05	0
CLEC3B	6.27604	6.63945	5.89215	6.16915	-0.213772	-0.490772	-0.470293	-0.747294	0.0336822	0.157824	0.613445	0.0215335	0.0918842	0.656046	0.383174	0.817841	0.556645	0.160022	0.437739	0.559524	0.088723	0.259891	0.607639	0.681539	0.956715	0.50463	0.00453605	0.1424	0.742857	0.0019434	0.0594044	0.772222	0.0865878	0.533758	0.703704	<	6.83568	40	20	2	31	0.952381	0.392157	0.56338	0.909091	0.645161	6.75223e-05	0
P4HB	10.782	10.823	10.4879	10.5555	-0.238532	-0.306162	-0.26749	-0.335119	0.000296356	0.0098812	0.717554	0.000364603	0.00576644	0.736928	0.0143884	0.447072	0.691721	0.00206794	0.0412166	0.707672	0.00186579	0.0215353	0.721065	0.035015	0.651225	0.689815	0.00877959	0.172919	0.74127	0.00518835	0.0859323	0.775	0.0495855	0.488411	0.696296	<	10.6987	30	36	12	15	0.714286	0.705882	0.666667	0.75	0.709677	6.89577e-05	0
GINS2	5.89425	5.89423	6.24738	6.09819	0.203947	0.353131	0.203965	0.353148	5.24914e-05	0.00363099	0.736695	2.10251e-05	0.000817765	0.785131	0.0249604	0.480692	0.672113	0.000323567	0.0139615	0.736111	0.000121665	0.00347459	0.780093	0.0423933	0.668977	0.677469	0.00504712	0.145594	0.738095	0.00114092	0.0491556	0.797222	0.0819451	0.52542	0.659259	>	6.04209	30	36	12	15	0.714286	0.705882	0.666667	0.75	0.709677	6.89577e-05	0
MAP3K7	7.58708	7.59236	7.88428	7.83222	0.243588	0.295643	0.239858	0.291912	0.000125092	0.0061292	0.726891	0.000622623	0.00827033	0.731209	0.00685483	0.425064	0.721133	0.000480581	0.0175958	0.723545	0.0016269	0.0196086	0.729167	0.0110831	0.581574	0.716049	0.0080156	0.170088	0.734921	0.0124652	0.128039	0.736111	0.0315955	0.456229	0.733333	>	7.73762	30	36	12	15	0.714286	0.705882	0.666667	0.75	0.709677	6.89577e-05	0
MTL5	5.14719	5.01822	5.96451	5.68964	0.580381	0.855249	0.671418	0.946286	0.000546705	0.014084	0.725957	0.000180729	0.00353517	0.788399	0.0294508	0.489406	0.642702	0.00468649	0.0661315	0.714286	0.00180244	0.0210584	0.773148	0.0777249	0.709954	0.635802	0.0119485	0.192241	0.753968	0.00253782	0.0638487	0.825	0.0741341	0.52002	0.659259	>	5.15926	30	36	12	15	0.714286	0.705882	0.666667	0.75	0.709677	6.89577e-05	0
CAND1	7.60174	7.819	7.9658	7.92394	0.258295	0.300157	0.104935	0.146796	0.0299281	0.147076	0.706349	0.0390375	0.136243	0.737745	0.160624	0.668561	0.664488	0.00719289	0.0837397	0.73082	0.00530185	0.0427721	0.758102	0.0661548	0.703845	0.694444	0.525655	0.793159	0.647619	0.484302	0.728001	0.688889	0.708936	0.914716	0.592593	>	7.70372	30	36	12	15	0.714286	0.705882	0.666667	0.75	0.709677	6.89577e-05	0
EPAS1	6.47149	6.36174	6.06002	6.11535	-0.323857	-0.379186	-0.24639	-0.30172	4.79654e-05	0.00346298	0.74183	0.000569305	0.00781124	0.72549	0.00157197	0.378067	0.763617	3.7791e-05	0.00438275	0.756614	0.00044959	0.00826841	0.740741	0.000460873	0.581574	0.777778	0.0333957	0.274457	0.706349	0.0629997	0.273282	0.688889	0.0578049	0.497503	0.72963	<	6.32595	33	32	9	19	0.785714	0.627451	0.634615	0.780488	0.698925	6.99229e-05	0
EPHA1	6.26059	6.04829	5.74619	6.05436	-0.143785	-0.451955	0.00606958	-0.3021	8.35623e-05	0.00477284	0.723156	6.1558e-06	0.000363011	0.808007	0.157048	0.664239	0.610022	2.66128e-05	0.00369456	0.753968	3.34273e-06	0.000307385	0.834491	0.0590918	0.695432	0.646605	0.102113	0.421478	0.649206	0.00812217	0.104398	0.744444	0.953802	0.987989	0.522222	<	6.05511	33	32	9	19	0.785714	0.627451	0.634615	0.780488	0.698925	6.99229e-05	0
POR	7.98842	7.84195	7.35792	7.8395	-0.105843	-0.587422	-0.00245478	-0.484033	0.000232674	0.0086861	0.719888	3.11917e-07	4.55148e-05	0.81781	0.388698	0.819496	0.589325	0.000294843	0.0134571	0.743386	6.58227e-07	0.000109655	0.836806	0.266351	0.830089	0.618827	0.0786987	0.380371	0.663492	0.00160752	0.0556949	0.772222	0.988414	0.995836	0.518519	<	7.84597	33	32	9	19	0.785714	0.627451	0.634615	0.780488	0.698925	6.99229e-05	0
MAP3K9	5.5794	5.55371	4.98715	5.27361	-0.298241	-0.584694	-0.280106	-0.566559	0.00052809	0.0137568	0.713819	0.00045528	0.00668736	0.767974	0.0826907	0.586902	0.641612	0.00145918	0.033723	0.713624	0.00121768	0.0164256	0.769676	0.0989348	0.734793	0.638889	0.0101107	0.181937	0.714286	0.00523357	0.0860165	0.763889	0.122099	0.573704	0.648148	<	5.38408	33	32	9	19	0.785714	0.627451	0.634615	0.780488	0.698925	6.99229e-05	0
TPCN1	6.15537	6.21566	5.9904	6.04623	-0.126876	-0.182704	-0.169429	-0.225257	0.00113076	0.0215782	0.704482	0.00119911	0.0129926	0.743464	0.0497134	0.535707	0.652505	0.00788517	0.0885078	0.686508	0.00574714	0.0452149	0.725694	0.112321	0.738686	0.634259	0.00559095	0.151243	0.747619	0.00358453	0.0737984	0.786111	0.0567519	0.497463	0.696296	<	6.15496	33	32	9	19	0.785714	0.627451	0.634615	0.780488	0.698925	6.99229e-05	0
CASP4	6.42003	6.38685	6.10781	6.1398	-0.270475	-0.302463	-0.247057	-0.279045	0.00101978	0.0203008	0.701214	0.00404476	0.02975	0.713235	0.020837	0.469558	0.685185	0.00170718	0.0368555	0.695106	0.00511225	0.041696	0.707176	0.0226452	0.62184	0.679012	0.0320455	0.27242	0.715873	0.0428205	0.226581	0.727778	0.0971412	0.543454	0.7	<	6.33498	33	32	9	19	0.785714	0.627451	0.634615	0.780488	0.698925	6.99229e-05	0
SPCS1	11.0389	11.0905	10.8561	10.8744	-0.179656	-0.197936	-0.216024	-0.234304	0.00114556	0.0217069	0.69281	0.0062983	0.0401028	0.689542	0.0153007	0.447072	0.697168	0.00835719	0.0914443	0.666667	0.0257123	0.117704	0.665509	0.0467757	0.677709	0.66821	0.00383862	0.136474	0.755556	0.0107674	0.120455	0.747222	0.00606523	0.372852	0.766667	<	11.0045	33	32	9	19	0.785714	0.627451	0.634615	0.780488	0.698925	6.99229e-05	0
RRAD	5.95038	6.30325	5.09004	6.07264	0.0184738	-0.96413	-0.230611	-1.21322	0.0144864	0.0962117	0.6676	0.000108608	0.00254834	0.777778	0.951565	0.989973	0.520697	0.0726402	0.290546	0.622354	0.00111132	0.0154496	0.728009	0.712621	0.961882	0.518519	0.00866512	0.172702	0.77619	7.55201e-06	0.0116132	0.897222	0.532045	0.84077	0.614815	<	5.70521	33	32	9	19	0.785714	0.627451	0.634615	0.780488	0.698925	6.99229e-05	0
HMX2	3.00256	2.95248	3.50365	3.29829	0.310464	0.515818	0.345819	0.551173	0.000541459	0.0139822	0.743697	0.000274064	0.00473069	0.736928	0.00969052	0.427184	0.752723	0.0039958	0.0604236	0.742725	0.00216713	0.0237387	0.737269	0.029214	0.64222	0.75	0.0293973	0.26491	0.746032	0.0209216	0.161111	0.736111	0.0676015	0.509465	0.759259	>	2.96309	33	32	9	19	0.785714	0.627451	0.634615	0.780488	0.698925	6.99229e-05	0
C18orf54	4.06014	4.07574	4.60438	4.20243	0.137705	0.539646	0.126697	0.528639	3.51343e-05	0.00299151	0.742764	4.68901e-07	5.93012e-05	0.831699	0.14435	0.650812	0.624183	0.000176653	0.0103867	0.750661	3.86769e-06	0.000333285	0.840278	0.150578	0.772307	0.631173	0.00973686	0.180822	0.72381	0.000792777	0.044045	0.811111	0.297326	0.719322	0.607407	>	4.13492	33	32	9	19	0.785714	0.627451	0.634615	0.780488	0.698925	6.99229e-05	0
ILF3	7.91248	7.85469	8.30452	8.04892	0.153438	0.409039	0.194235	0.449836	2.20764e-05	0.0023475	0.732026	1.10458e-06	0.000113823	0.821078	0.0805674	0.586535	0.61329	0.000183959	0.0104773	0.724868	7.06503e-06	0.000508575	0.820602	0.12893	0.752475	0.597222	0.00124395	0.0982921	0.749206	0.000118548	0.0251064	0.822222	0.100184	0.548104	0.651852	>	7.97609	33	32	9	19	0.785714	0.627451	0.634615	0.780488	0.698925	6.99229e-05	0
TMEM206	5.49964	5.40567	5.80265	5.74908	0.277074	0.330645	0.343411	0.396982	2.72042e-05	0.00261461	0.729225	4.63728e-05	0.00139839	0.760621	0.00316346	0.387853	0.687364	0.000685808	0.0220773	0.699735	0.000715912	0.0114586	0.725694	0.0166974	0.612929	0.665123	0.000822543	0.0879329	0.8	0.000420134	0.0361419	0.844444	0.0093434	0.393563	0.740741	>	5.53592	33	32	9	19	0.785714	0.627451	0.634615	0.780488	0.698925	6.99229e-05	0
PTGES3	12.0874	12.0703	12.2896	12.3646	0.282251	0.20724	0.294353	0.219343	0.000143169	0.00647852	0.723156	0.00592153	0.0386253	0.687092	0.000509654	0.378067	0.771242	0.000873637	0.0252383	0.712302	0.0154024	0.086032	0.675926	0.00180771	0.581574	0.760802	0.00434271	0.139793	0.749206	0.0267053	0.181409	0.713889	0.00258056	0.347555	0.796296	>	12.176	33	32	9	19	0.785714	0.627451	0.634615	0.780488	0.698925	6.99229e-05	0
C14orf93	4.86763	4.77634	5.12372	5.07739	0.236603	0.282932	0.301042	0.347372	0.00175152	0.0281684	0.696078	0.00572306	0.0377839	0.698529	0.0278695	0.487435	0.69281	0.0111249	0.106272	0.666005	0.0223748	0.10786	0.670139	0.070597	0.703845	0.660494	0.00543261	0.149386	0.768254	0.00998858	0.116094	0.766667	0.0185108	0.413876	0.77037	>	4.93304	33	32	9	19	0.785714	0.627451	0.634615	0.780488	0.698925	6.99229e-05	0
ZNF292	5.97185	6.07946	6.42368	6.14267	0.139162	0.420173	0.0632024	0.344214	4.30814e-05	0.00328324	0.732493	1.34951e-06	0.000128442	0.812092	0.0929956	0.595357	0.626362	8.1773e-05	0.00682275	0.748677	4.89496e-06	0.000399409	0.819444	0.064104	0.703735	0.654321	0.0376464	0.287687	0.693651	0.00331855	0.0714883	0.794444	0.527483	0.839315	0.559259	>	6.6159	11	51	31	0	0.261905	1	1	0.621951	0.666667	7.02158e-05	0
SYTL1	8.93	8.55239	7.79416	8.58577	-0.233169	-1.02477	0.033378	-0.758228	3.21516e-05	0.00286277	0.727358	1.91477e-07	3.7975e-05	0.81781	0.14352	0.650052	0.606754	2.81683e-05	0.00377697	0.761905	4.52843e-07	8.7892e-05	0.853009	0.0469141	0.677709	0.640432	0.101393	0.420614	0.644444	0.00775968	0.101643	0.733333	0.863431	0.964095	0.525926	<	7.73856	11	51	31	0	0.261905	1	1	0.621951	0.666667	7.02158e-05	0
MED23	6.1194	6.20957	6.55906	6.23633	0.0904099	0.413143	0.0267604	0.349494	2.32404e-05	0.00241979	0.72409	2.37834e-07	4.10119e-05	0.810458	0.177596	0.686216	0.608932	4.29699e-05	0.00464651	0.742725	9.96669e-07	0.000140979	0.820602	0.101934	0.734793	0.638889	0.0292748	0.26491	0.679365	0.00184703	0.0584239	0.786111	0.722634	0.920612	0.537037	>	6.69101	11	51	31	0	0.261905	1	1	0.621951	0.666667	7.02158e-05	0
FBXW8	4.98755	4.94663	5.18805	5.10717	0.131653	0.212542	0.160535	0.241423	0.000484576	0.0131619	0.718954	0.000105206	0.00250025	0.75	0.0456318	0.525292	0.67756	0.00247864	0.0456265	0.718254	0.000308927	0.00642638	0.747685	0.0797838	0.713947	0.679012	0.0143459	0.208313	0.720635	0.00474394	0.082754	0.755556	0.12882	0.581713	0.674074	>	5.30481	11	51	31	0	0.261905	1	1	0.621951	0.666667	7.02158e-05	0
RAD51AP1	8.51304	8.17694	9.11871	8.70569	0.291507	0.704531	0.528751	0.941774	9.84269e-05	0.00528892	0.715686	2.74535e-05	0.000981793	0.777778	0.0753837	0.576509	0.632898	0.0022661	0.0434825	0.684524	0.000378505	0.00734631	0.755787	0.223096	0.813349	0.589506	0.000175091	0.0614079	0.790476	0.000111846	0.0248436	0.830556	0.0124181	0.398511	0.737037	>	9.3941	11	51	31	0	0.261905	1	1	0.621951	0.666667	7.02158e-05	0
BAG3	10.4371	10.2178	9.65632	10.1518	-0.220783	-0.716252	-0.0659718	-0.56144	5.56642e-05	0.00378498	0.715219	2.91001e-06	0.00021626	0.79085	0.0959019	0.598183	0.614379	5.0408e-05	0.00514136	0.753307	4.28793e-06	0.000357167	0.81713	0.038803	0.667565	0.66821	0.0652101	0.353122	0.62381	0.0107177	0.12037	0.727778	0.683627	0.905227	0.514815	<	9.33445	11	51	31	0	0.261905	1	1	0.621951	0.666667	7.02158e-05	0
APEX1	10.5863	10.6699	11.0214	10.8144	0.203453	0.410456	0.144431	0.351433	0.000241855	0.00890507	0.713819	1.90814e-05	0.000773744	0.764706	0.0501115	0.536863	0.645969	0.000615174	0.0205651	0.725529	6.77381e-05	0.00235505	0.77662	0.0526052	0.688749	0.657407	0.0574029	0.337413	0.685714	0.0110725	0.121336	0.736111	0.335611	0.740122	0.618519	>	11.1774	11	51	31	0	0.261905	1	1	0.621951	0.666667	7.02158e-05	0
MYOF	7.71214	7.6063	6.96528	7.58331	-0.0977003	-0.715734	-0.0229858	-0.64102	4.16206e-05	0.00326289	0.706816	6.61455e-08	1.9736e-05	0.803922	0.349922	0.797472	0.577342	0.000103003	0.00762645	0.72619	4.05469e-07	8.27115e-05	0.815972	0.2315	0.81365	0.606481	0.0314688	0.27166	0.660317	0.00127127	0.051432	0.775	0.862743	0.963984	0.507407	<	6.56547	11	51	31	0	0.261905	1	1	0.621951	0.666667	7.02158e-05	0
VASH2	3.53327	3.67122	4.74494	3.72541	0.151565	1.1711	0.0541922	1.07373	4.2322e-05	0.00328324	0.703081	1.39217e-08	6.32522e-06	0.85049	0.301928	0.770271	0.506536	0.000208563	0.0112686	0.72619	3.68011e-07	7.8265e-05	0.868056	0.239988	0.814949	0.537037	0.0366657	0.284654	0.647619	0.00133412	0.0520907	0.808333	0.80511	0.946255	0.566667	>	5.09401	11	51	31	0	0.261905	1	1	0.621951	0.666667	7.02158e-05	0
TAB2	8.50817	8.42571	8.8388	8.5917	0.107781	0.354883	0.165987	0.413089	0.000589902	0.0146858	0.690476	3.65866e-05	0.00117964	0.754902	0.193926	0.702261	0.604575	0.00456799	0.0653677	0.670635	0.000316884	0.00654534	0.738426	0.329049	0.861472	0.580247	0.0075886	0.16931	0.738095	0.00150601	0.0553832	0.794444	0.151861	0.60378	0.662963	>	8.9596	11	51	31	0	0.261905	1	1	0.621951	0.666667	7.02158e-05	0
PSIP1	6.27832	6.19329	6.76011	6.41757	0.164255	0.506799	0.224278	0.566823	0.00138404	0.024442	0.689076	0.000232542	0.00419941	0.75	0.145232	0.651938	0.607843	0.00952123	0.0980269	0.672619	0.0021492	0.0236329	0.737269	0.264532	0.82953	0.58642	0.0187998	0.229374	0.728571	0.00740264	0.0994531	0.780556	0.104619	0.55427	0.659259	>	7.1245	11	51	31	0	0.261905	1	1	0.621951	0.666667	7.02158e-05	0
LOC643008	6.08706	5.73581	5.46312	5.71933	-0.26442	-0.520629	-0.0164789	-0.272689	0.00212495	0.031607	0.684407	0.00150521	0.0152203	0.732026	0.120143	0.62641	0.620915	0.000532986	0.018921	0.720899	0.000518555	0.00909337	0.761574	0.0426977	0.668977	0.666667	0.359758	0.688906	0.596825	0.174391	0.446039	0.661111	0.929887	0.980198	0.511111	<	5.08789	11	51	31	0	0.261905	1	1	0.621951	0.666667	7.02158e-05	0
MALT1	7.32504	7.09602	7.7502	7.56874	0.311053	0.492513	0.472715	0.654175	0.000289234	0.00981181	0.68394	0.000548544	0.0076164	0.687092	0.00818908	0.425138	0.679739	0.00544079	0.0721745	0.651455	0.00585992	0.0458418	0.665509	0.0361557	0.653847	0.632716	0.00204503	0.112526	0.761905	0.00439456	0.0811187	0.738889	0.00339921	0.354125	0.792593	>	8.1527	11	51	31	0	0.261905	1	1	0.621951	0.666667	7.02158e-05	0
GSDMC	6.62021	6.22273	5.56643	6.35108	-0.152229	-0.936877	0.128342	-0.656307	0.000922632	0.0191331	0.680672	9.86286e-06	0.000490074	0.800654	0.504372	0.87056	0.520697	0.000384028	0.0155093	0.712963	5.23192e-06	0.000420046	0.824074	0.269928	0.830235	0.564815	0.200134	0.548417	0.603175	0.00861905	0.106825	0.744444	0.637552	0.886112	0.585185	<	5.17789	11	51	31	0	0.261905	1	1	0.621951	0.666667	7.02158e-05	0
C20orf12	3.8343	3.82411	4.37196	3.93849	0.107192	0.540657	0.114388	0.547853	0.00030971	0.0102169	0.679739	4.0221e-06	0.00026802	0.773693	0.210462	0.71669	0.554466	0.00212973	0.041905	0.679233	7.41923e-05	0.0024799	0.769676	0.281187	0.836117	0.558642	0.0279042	0.26214	0.680952	0.00389259	0.075974	0.783333	0.330103	0.73626	0.544444	>	4.4744	11	51	31	0	0.261905	1	1	0.621951	0.666667	7.02158e-05	0
ZHX1	7.55812	7.42477	7.22232	7.08463	-0.434272	-0.296581	-0.340144	-0.202453	0.00068764	0.0159844	0.678338	0.0186877	0.0836326	0.628268	0.000514036	0.378067	0.745098	0.000603103	0.0203659	0.701058	0.0137104	0.0791464	0.648148	0.000260326	0.581574	0.771605	0.101195	0.420143	0.62381	0.278005	0.555169	0.580556	0.0366114	0.468376	0.681481	<	6.79985	11	51	31	0	0.261905	1	1	0.621951	0.666667	7.02158e-05	0
CRLS1	6.52782	6.66817	6.89449	6.68325	0.114152	0.325387	0.0150855	0.22632	0.000770417	0.0170558	0.677404	2.96283e-05	0.00102365	0.755719	0.175588	0.68476	0.572985	0.000521146	0.018604	0.707672	2.55833e-05	0.00120379	0.787037	0.0948022	0.731271	0.601852	0.204313	0.552323	0.604762	0.0343128	0.20364	0.680556	0.897599	0.974019	0.503704	>	7.09691	11	51	31	0	0.261905	1	1	0.621951	0.666667	7.02158e-05	0
CSE1L	8.57755	8.63052	8.81854	8.87612	0.282993	0.225408	0.245607	0.188022	0.00233569	0.0333182	0.674136	0.0191704	0.0850879	0.647876	0.00892356	0.427184	0.70915	0.00382542	0.0586457	0.681217	0.02277	0.109139	0.65625	0.0116837	0.583792	0.714506	0.0656637	0.35391	0.657143	0.128342	0.38634	0.627778	0.0674484	0.509459	0.696296	>	9.20237	11	51	31	0	0.261905	1	1	0.621951	0.666667	7.02158e-05	0
THBD	7.7324	6.92995	6.16063	7.62158	0.125193	-1.33576	0.691628	-0.769328	0.00572184	0.0561263	0.673669	2.53417e-06	0.00019873	0.826797	0.697368	0.926412	0.530501	0.0010323	0.0273399	0.716931	3.85932e-07	8.03663e-05	0.861111	0.747275	0.969521	0.524691	0.690757	0.879137	0.569841	0.0114433	0.122991	0.744444	0.0827023	0.525486	0.662963	<	5.68337	11	51	31	0	0.261905	1	1	0.621951	0.666667	7.02158e-05	0
SH3RF2	5.36947	4.90191	4.49486	4.86129	-0.370663	-0.737096	-0.0406204	-0.407053	0.000914156	0.0190225	0.672736	0.000416845	0.00629868	0.704248	0.0677242	0.56434	0.630719	0.000296597	0.0134756	0.709656	0.000183861	0.00454897	0.736111	0.0206805	0.620524	0.674383	0.331301	0.665298	0.584127	0.154878	0.421879	0.627778	0.869348	0.966474	0.525926	<	3.83746	11	51	31	0	0.261905	1	1	0.621951	0.666667	7.02158e-05	0
WTAP	6.9042	6.91602	7.08495	7.02195	0.114274	0.17727	0.105931	0.168927	0.00150906	0.025823	0.670401	0.00170862	0.0165811	0.683007	0.0296959	0.489406	0.653595	0.00431669	0.0634522	0.678571	0.00453567	0.0384695	0.693287	0.0406024	0.668537	0.658951	0.0612497	0.344816	0.650794	0.0535093	0.253364	0.658333	0.147894	0.599664	0.640741	>	7.25616	11	51	31	0	0.261905	1	1	0.621951	0.666667	7.02158e-05	0
TEX11	3.20928	3.22758	3.58931	3.24653	0.0318706	0.374655	0.0189514	0.361736	0.00641396	0.0599166	0.668534	0.000450246	0.00664761	0.718137	0.318848	0.777803	0.602397	0.0184033	0.139293	0.68254	0.00260461	0.0268524	0.731481	0.298193	0.845223	0.617284	0.153986	0.492535	0.634921	0.0584118	0.263559	0.686111	0.683526	0.905227	0.566667	>	3.43868	11	51	31	0	0.261905	1	1	0.621951	0.666667	7.02158e-05	0
SLC12A6	6.97679	6.74534	6.09297	6.84141	-0.0673105	-0.815752	0.0960716	-0.65237	0.004367	0.0481526	0.667134	3.42633e-05	0.00113591	0.789216	0.758876	0.943438	0.504357	0.002809	0.0494688	0.695106	1.67216e-05	0.000910847	0.818287	0.549011	0.925847	0.530864	0.204818	0.55294	0.6	0.012935	0.130138	0.719444	0.751309	0.930391	0.559259	<	5.7171	11	51	31	0	0.261905	1	1	0.621951	0.666667	7.02158e-05	0
TMEM154	6.92069	6.62743	5.6741	6.62196	-0.212476	-1.16034	-0.00546727	-0.953333	0.00135494	0.0240771	0.666667	1.90222e-05	0.000772912	0.776961	0.445194	0.846376	0.519608	0.0010728	0.0280345	0.689153	1.38683e-05	0.000803599	0.802083	0.292629	0.842653	0.53858	0.136889	0.470314	0.612698	0.0147718	0.138575	0.716667	0.988958	0.996234	0.525926	<	5.01277	11	51	31	0	0.261905	1	1	0.621951	0.666667	7.02158e-05	0
ACOT9	8.46883	8.55888	8.21703	8.33254	-0.162772	-0.278292	-0.226336	-0.341855	0.0072398	0.0642677	0.658263	0.00341019	0.0264339	0.696078	0.138472	0.645117	0.607843	0.0363712	0.200811	0.636243	0.017321	0.0925343	0.675926	0.267844	0.830089	0.583333	0.0217957	0.239669	0.711111	0.00695419	0.0970818	0.744444	0.126394	0.577874	0.666667	<	7.90406	11	51	31	0	0.261905	1	1	0.621951	0.666667	7.02158e-05	0
MYBPC3	5.91095	5.9814	5.82595	5.81079	-0.120886	-0.10572	-0.170615	-0.155449	0.00631715	0.059418	0.650327	0.0285184	0.110963	0.644608	0.0176015	0.454956	0.657952	0.0427208	0.21909	0.619048	0.102629	0.283965	0.613426	0.0622279	0.699661	0.626543	0.0122758	0.195076	0.725397	0.0320539	0.19672	0.719444	0.0181928	0.412467	0.733333	<	5.66478	11	51	31	0	0.261905	1	1	0.621951	0.666667	7.02158e-05	0
PCDH8	2.52397	2.51939	3.40149	2.74958	0.226954	0.878864	0.230191	0.882102	0.00114683	0.0217105	0.644258	8.86669e-06	0.000459207	0.732843	0.169933	0.67896	0.526144	0.00604124	0.0760041	0.650132	0.000163101	0.00425661	0.739583	0.247487	0.819103	0.530864	0.0691559	0.361437	0.630159	0.011586	0.123793	0.716667	0.435187	0.792986	0.514815	>	3.15044	11	51	31	0	0.261905	1	1	0.621951	0.666667	7.02158e-05	0
ZP4	3.76921	3.73966	4.14711	3.89152	0.131003	0.386593	0.151858	0.407448	0.00198906	0.0303536	0.644258	0.000412019	0.00624937	0.689542	0.0638328	0.557728	0.583878	0.0100691	0.100863	0.634259	0.00289641	0.0286219	0.681713	0.11848	0.743887	0.570988	0.0560497	0.334712	0.668254	0.0303722	0.191745	0.708333	0.152155	0.604356	0.614815	>	4.14962	11	51	31	0	0.261905	1	1	0.621951	0.666667	7.02158e-05	0
NFKBIA	11.0488	10.9694	10.4168	10.8196	-0.205817	-0.608585	-0.149794	-0.552562	0.00324474	0.0402739	0.643791	0.000854847	0.0103071	0.691176	0.193665	0.70226	0.58061	0.00653816	0.0792629	0.647487	0.00223695	0.0242921	0.695602	0.184504	0.789447	0.583333	0.0928624	0.408695	0.634921	0.0390823	0.216545	0.680556	0.420933	0.786437	0.574074	<	9.94935	11	51	31	0	0.261905	1	1	0.621951	0.666667	7.02158e-05	0
PLIN4	4.40059	4.36253	4.24734	4.25757	-0.131826	-0.14205	-0.104964	-0.115188	0.0165162	0.103861	0.634454	0.0465651	0.153611	0.629902	0.048173	0.534479	0.640523	0.0217744	0.151617	0.644841	0.0558123	0.192873	0.636574	0.0481768	0.677709	0.655864	0.193973	0.542185	0.609524	0.262727	0.541127	0.613889	0.1821	0.630727	0.603704	<	4.06123	11	51	31	0	0.261905	1	1	0.621951	0.666667	7.02158e-05	0
SRP14	11.827	11.8389	12.0195	11.8669	0.0364655	0.189032	0.0280526	0.180619	0.0148822	0.0977686	0.628385	0.00154598	0.0154916	0.701797	0.55419	0.886546	0.530501	0.0226293	0.153998	0.637566	0.00263424	0.0270323	0.709491	0.534859	0.923986	0.541667	0.145529	0.48126	0.606349	0.0390407	0.216494	0.683333	0.744533	0.927642	0.503704	>	12.1378	11	51	31	0	0.261905	1	1	0.621951	0.666667	7.02158e-05	0
LOC729810	6.43185	6.52187	6.60946	6.54496	0.0866355	0.151137	0.0230953	0.0875966	0.0323644	0.154172	0.628385	0.0264896	0.105552	0.640523	0.189084	0.697028	0.6122	0.0223592	0.153233	0.652778	0.020316	0.101585	0.664352	0.116254	0.741665	0.637346	0.510001	0.7836	0.569841	0.392079	0.658107	0.583333	0.796782	0.944379	0.551852	>	6.81719	11	51	31	0	0.261905	1	1	0.621951	0.666667	7.02158e-05	0
ANKRD34A	4.63662	4.68852	4.51857	4.54406	-0.107825	-0.13332	-0.144459	-0.169955	0.0251746	0.132718	0.621382	0.0302259	0.115358	0.652778	0.101762	0.605624	0.579521	0.0869069	0.318246	0.600529	0.0892149	0.260844	0.623843	0.210269	0.810702	0.569444	0.0677397	0.358155	0.671429	0.0638441	0.274829	0.722222	0.124473	0.576682	0.603704	<	4.31588	11	51	31	0	0.261905	1	1	0.621951	0.666667	7.02158e-05	0
XKR4	2.87016	2.97825	3.447	3.29424	0.392291	0.545052	0.315986	0.468747	0.00179039	0.0284739	0.612979	0.000348124	0.00555414	0.640523	0.0149333	0.447072	0.576253	0.00494508	0.0681559	0.652778	0.00136663	0.0175355	0.673611	0.0260971	0.63314	0.625	0.144673	0.479787	0.51746	0.0836573	0.313052	0.561111	0.274661	0.704644	0.540741	>	3.2737	11	51	31	0	0.261905	1	1	0.621951	0.666667	7.02158e-05	0
MAPK12	6.09363	6.19065	5.85312	6.12193	-0.00023557	-0.269043	-0.0687247	-0.337532	0.0150785	0.0983472	0.612512	0.000331265	0.0053759	0.713235	0.997172	0.998571	0.521786	0.0741424	0.293967	0.588624	0.00304419	0.0295416	0.69213	0.679286	0.956154	0.549383	0.033675	0.274457	0.669841	0.00472432	0.0825559	0.763889	0.464173	0.808988	0.544444	<	5.70746	11	51	31	0	0.261905	1	1	0.621951	0.666667	7.02158e-05	0
RNF165	3.34883	3.30557	3.83494	3.49047	0.15437	0.498834	0.184907	0.529371	0.00186021	0.0291666	0.611578	0.000129901	0.00285367	0.651144	0.112438	0.616278	0.558824	0.0108281	0.104471	0.604497	0.00147158	0.0184441	0.650463	0.211479	0.81193	0.54321	0.0531283	0.326423	0.628571	0.0178512	0.151021	0.652778	0.233004	0.671736	0.596296	>	4.0595	11	51	31	0	0.261905	1	1	0.621951	0.666667	7.02158e-05	0
FAM102A	8.33554	8.10276	7.80682	8.31709	0.0500163	-0.460257	0.214335	-0.295939	0.0813198	0.262797	0.592437	0.00343139	0.0265302	0.721405	0.763525	0.944769	0.579521	0.0514483	0.24098	0.613757	0.00302353	0.0293843	0.733796	0.920722	0.99101	0.546296	0.709937	0.886869	0.54127	0.155817	0.42343	0.691667	0.313002	0.7281	0.659259	<	7.35813	11	51	31	0	0.261905	1	1	0.621951	0.666667	7.02158e-05	0
MCART6	2.74098	2.76059	2.83884	2.7812	0.0344461	0.0920856	0.0206054	0.0782449	0.0232313	0.126475	0.590103	0.0101463	0.0557238	0.628268	0.292191	0.765935	0.539216	0.0282294	0.17406	0.601852	0.0138009	0.0794853	0.642361	0.244572	0.818321	0.54784	0.280172	0.625026	0.561905	0.180673	0.45409	0.594444	0.677332	0.903114	0.518519	>	2.94289	11	51	31	0	0.261905	1	1	0.621951	0.666667	7.02158e-05	0
SP140L	5.29016	5.35173	5.227	5.07244	-0.235823	-0.0812617	-0.279288	-0.124726	0.0848835	0.270079	0.587302	0.424927	0.623541	0.537582	0.0135466	0.447072	0.653595	0.192728	0.478929	0.585317	0.591828	0.774447	0.545139	0.0443645	0.674353	0.638889	0.149673	0.487472	0.592063	0.406911	0.669132	0.519444	0.0172923	0.410289	0.688889	<	4.73772	11	51	31	0	0.261905	1	1	0.621951	0.666667	7.02158e-05	0
ZNF10	4.75216	4.90501	5.27823	4.71893	-0.0781834	0.481109	-0.186079	0.373214	0.0243673	0.130422	0.584034	0.000108752	0.00254872	0.705882	0.470511	0.856725	0.578431	0.0221456	0.152923	0.62037	0.000262426	0.00577134	0.737269	0.785633	0.975056	0.535494	0.430177	0.735643	0.503175	0.0384834	0.21479	0.630556	0.16383	0.618248	0.681481	>	5.47802	11	51	31	0	0.261905	1	1	0.621951	0.666667	7.02158e-05	0
TNFRSF19	5.2322	5.25279	6.05143	5.23721	-0.00104752	0.813169	-0.0155841	0.798633	0.0127411	0.0893086	0.583567	0.000154841	0.00318131	0.689542	0.995162	0.998208	0.557734	0.0292633	0.177662	0.584656	0.000871565	0.0130415	0.690972	0.979092	0.998435	0.557099	0.156893	0.496038	0.580952	0.0235278	0.170538	0.686111	0.951656	0.987187	0.559259	>	6.36116	11	51	31	0	0.261905	1	1	0.621951	0.666667	7.02158e-05	0
WISP3	3.36084	3.30134	3.38647	3.06311	-0.280227	0.0431244	-0.238225	0.0851258	0.457598	0.681049	0.579365	0.792376	0.89066	0.530229	0.0768586	0.580023	0.64488	0.419616	0.694876	0.59127	0.884907	0.943088	0.543981	0.0680786	0.703845	0.654321	0.765049	0.911736	0.550794	0.701548	0.865185	0.502778	0.154835	0.60793	0.622222	<	2.86104	11	51	31	0	0.261905	1	1	0.621951	0.666667	7.02158e-05	0
AVPI1	7.97703	7.95808	7.40076	8.10354	0.13208	-0.570697	0.145455	-0.557322	0.0797059	0.259638	0.57563	0.000999951	0.011382	0.699346	0.456465	0.851247	0.589325	0.111431	0.36192	0.579365	0.00240446	0.0254595	0.700231	0.505973	0.919061	0.58179	0.295105	0.635031	0.566667	0.0279378	0.184616	0.697222	0.554196	0.851878	0.607407	<	6.86328	11	51	31	0	0.261905	1	1	0.621951	0.666667	7.02158e-05	0
LOC340544	3.90579	3.96648	3.84193	3.93847	0.0148337	-0.0817117	-0.0280018	-0.124547	0.237107	0.480414	0.571895	0.0309773	0.117308	0.648693	0.71771	0.932251	0.530501	0.561064	0.789529	0.542989	0.127308	0.324624	0.625	0.470945	0.908905	0.566358	0.139193	0.472669	0.64127	0.0348593	0.205137	0.705556	0.648326	0.89003	0.555556	<	3.72757	11	51	31	0	0.261905	1	1	0.621951	0.666667	7.02158e-05	0
UBASH3B	4.52448	4.44088	4.27681	4.70693	0.207037	-0.223084	0.266045	-0.164076	0.750967	0.873115	0.543884	0.118142	0.281903	0.687092	0.132197	0.639184	0.647059	0.646889	0.83902	0.554894	0.120112	0.312548	0.696759	0.218098	0.812698	0.634259	0.91654	0.971492	0.51746	0.44092	0.696352	0.663889	0.144457	0.59817	0.677778	<	3.80266	11	51	31	0	0.261905	1	1	0.621951	0.666667	7.02158e-05	0
NCALD	4.56227	4.47494	4.93173	4.53717	0.000586872	0.395144	0.0622343	0.456791	0.0530123	0.205016	0.537348	0.00281227	0.023241	0.628268	0.995907	0.998376	0.583878	0.135812	0.401035	0.525132	0.0136188	0.0787854	0.621528	0.841812	0.981492	0.603395	0.156186	0.495108	0.566667	0.0408	0.220922	0.644444	0.730654	0.922331	0.537037	>	5.4585	11	51	31	0	0.261905	1	1	0.621951	0.666667	7.02158e-05	0
FBRSL1	6.68904	6.63826	6.66694	6.85366	0.179556	-0.00716864	0.215406	0.0286812	0.428958	0.658521	0.528011	0.94494	0.973576	0.514706	0.107819	0.611101	0.584967	0.577584	0.799729	0.525794	0.8474	0.924491	0.513889	0.176218	0.784322	0.578704	0.457826	0.753936	0.533333	0.852142	0.941187	0.516667	0.172622	0.624193	0.6	>	7.22296	11	51	31	0	0.261905	1	1	0.621951	0.666667	7.02158e-05	0
UNC13D	4.88476	4.88009	4.80967	4.73447	-0.148925	-0.0737161	-0.14563	-0.0704212	0.00154198	0.0261152	0.727358	0.0586632	0.178798	0.691993	0.000510978	0.378067	0.77451	0.00550531	0.0727065	0.71627	0.0940751	0.269165	0.68287	0.0021331	0.581574	0.760802	0.0336258	0.274457	0.753968	0.177907	0.450848	0.713889	0.00600011	0.372852	0.807407	<	4.74144	21	45	21	6	0.5	0.882353	0.777778	0.681818	0.709677	7.11204e-05	0
OSMR	7.8099	8.01033	6.93589	7.50716	-0.361693	-0.932967	-0.50317	-1.07444	0.000508287	0.0134763	0.702614	5.66689e-05	0.0016001	0.763889	0.0997171	0.602796	0.620915	0.0045004	0.0648345	0.685847	0.000597219	0.010039	0.748843	0.197667	0.799681	0.601852	0.00895855	0.174608	0.742857	0.00242217	0.063253	0.8	0.102062	0.550491	0.666667	<	7.09654	21	45	21	6	0.5	0.882353	0.777778	0.681818	0.709677	7.11204e-05	0
CPNE8	5.74288	5.53977	4.91323	5.49246	-0.190687	-0.769917	-0.0473168	-0.626547	0.000518257	0.0135978	0.699813	6.96933e-06	0.000388936	0.790033	0.295702	0.76781	0.579521	0.000679013	0.0219291	0.71627	1.50727e-05	0.000851182	0.803241	0.21486	0.812698	0.600309	0.0856163	0.395417	0.660317	0.00442849	0.0812201	0.758333	0.839214	0.957959	0.52963	<	5.07976	21	45	21	6	0.5	0.882353	0.777778	0.681818	0.709677	7.11204e-05	0
ASPG	4.4429	4.47488	4.33346	4.37517	-0.0771402	-0.118842	-0.0997169	-0.141419	0.00508302	0.0523703	0.678338	0.00795067	0.0468862	0.700163	0.0678394	0.56434	0.649237	0.0233746	0.156334	0.661376	0.0281266	0.124785	0.68287	0.136823	0.763238	0.632716	0.0244225	0.24913	0.719048	0.0329977	0.199836	0.741667	0.0630931	0.501337	0.688889	<	4.31615	21	45	21	6	0.5	0.882353	0.777778	0.681818	0.709677	7.11204e-05	0
LSM6	8.61108	8.63795	9.07675	8.92436	0.305377	0.457767	0.28641	0.4388	5.54116e-06	0.00114199	0.755369	6.36097e-06	0.000366241	0.79902	0.00572194	0.410689	0.697168	3.27747e-05	0.00406956	0.755952	2.90898e-05	0.00131867	0.797454	0.00950357	0.581574	0.700617	0.00227578	0.115019	0.753968	0.000838295	0.0445819	0.802778	0.0415127	0.483613	0.688889	>	9.06048	21	45	21	6	0.5	0.882353	0.777778	0.681818	0.709677	7.11204e-05	0
ZNF192	3.3823	3.50386	4.19618	3.50291	0.0848574	0.778121	-0.000945749	0.692317	7.0349e-05	0.00443643	0.731092	9.56549e-08	2.53038e-05	0.849673	0.388824	0.819496	0.572985	0.000178671	0.0104736	0.749339	7.3035e-07	0.000116803	0.866898	0.224533	0.813349	0.592593	0.0509644	0.321465	0.687302	0.0031299	0.069727	0.808333	0.994461	0.998033	0.525926	>	3.77725	21	45	21	6	0.5	0.882353	0.777778	0.681818	0.709677	7.11204e-05	0
GNL2	7.88862	7.9931	8.61729	8.10932	0.189971	0.697939	0.116223	0.624191	7.41182e-05	0.00454642	0.723156	1.25845e-06	0.000122551	0.804739	0.142981	0.649178	0.614379	0.000204906	0.0112227	0.739418	6.41636e-06	0.000476838	0.815972	0.116137	0.741665	0.637346	0.0297289	0.265497	0.684127	0.00272245	0.0653158	0.777778	0.484986	0.818425	0.559259	>	8.44927	21	45	21	6	0.5	0.882353	0.777778	0.681818	0.709677	7.11204e-05	0
ZRANB3	3.80579	3.75626	4.04253	3.88277	0.0915434	0.251307	0.126505	0.286269	0.00119218	0.0222671	0.71662	0.000170645	0.00340456	0.770425	0.181283	0.690233	0.64488	0.00786181	0.0883448	0.691799	0.00135186	0.0174665	0.753472	0.303861	0.846493	0.609568	0.00966707	0.180708	0.77619	0.00204798	0.0598911	0.811111	0.148328	0.599664	0.72963	>	3.99121	21	45	21	6	0.5	0.882353	0.777778	0.681818	0.709677	7.11204e-05	0
NUP43	6.49495	6.3232	6.95032	6.64555	0.201108	0.505878	0.322345	0.627115	9.02283e-05	0.00501043	0.707283	2.08469e-05	0.000815557	0.744281	0.0534647	0.545781	0.657952	0.00173206	0.036983	0.683201	0.000327876	0.00666638	0.726852	0.146383	0.770498	0.625	0.00100169	0.0910217	0.765079	0.000580726	0.0386977	0.786111	0.0179469	0.411349	0.737037	>	6.88717	21	45	21	6	0.5	0.882353	0.777778	0.681818	0.709677	7.11204e-05	0
LRP6	6.39254	6.47978	6.95642	6.59133	0.173134	0.538222	0.111556	0.476644	0.000105793	0.00552197	0.707283	4.49035e-06	0.000292399	0.779412	0.11921	0.624319	0.611111	0.000218854	0.0114956	0.724206	1.29003e-05	0.000761735	0.797454	0.0923326	0.727847	0.626543	0.0329936	0.273835	0.666667	0.00448501	0.0813788	0.736111	0.441781	0.796759	0.574074	>	6.77839	21	45	21	6	0.5	0.882353	0.777778	0.681818	0.709677	7.11204e-05	0
NRF1	5.56267	5.53017	5.75023	5.67432	0.121207	0.19712	0.144147	0.22006	0.00026013	0.00927925	0.706816	0.000173562	0.00344461	0.751634	0.0215712	0.469558	0.647059	0.00212793	0.041905	0.694444	0.00118447	0.0161741	0.744213	0.0501863	0.682963	0.628086	0.0094307	0.1787	0.736508	0.00631045	0.0931879	0.769444	0.0596736	0.499767	0.692593	>	5.7099	21	45	21	6	0.5	0.882353	0.777778	0.681818	0.709677	7.11204e-05	0
RCHY1	6.27187	6.29561	6.65885	6.49658	0.217726	0.379994	0.200969	0.363238	0.000326256	0.0105196	0.695612	7.06269e-06	0.000391778	0.79902	0.0567831	0.548174	0.557734	0.00100622	0.0270983	0.695767	1.45282e-05	0.000825092	0.795139	0.0734028	0.70752	0.563272	0.0384369	0.289741	0.695238	0.00335685	0.0718487	0.808333	0.275083	0.704866	0.544444	>	6.51708	21	45	21	6	0.5	0.882353	0.777778	0.681818	0.709677	7.11204e-05	0
ARL3	6.00312	6.11116	6.33373	6.09953	0.0646392	0.298835	-0.0116261	0.22257	0.000882376	0.018568	0.68254	2.54411e-05	0.000928091	0.77451	0.290017	0.764649	0.559913	0.000736512	0.023013	0.714947	3.79874e-05	0.00157881	0.805556	0.142311	0.767102	0.594136	0.200377	0.5487	0.604762	0.0385277	0.21479	0.7	0.888467	0.971009	0.522222	>	6.22413	21	45	21	6	0.5	0.882353	0.777778	0.681818	0.709677	7.11204e-05	0
MCM7	8.91816	8.81353	9.2895	9.17252	0.285134	0.402108	0.35899	0.475964	0.00269618	0.0364431	0.677404	0.00383863	0.0287301	0.714052	0.0423766	0.518453	0.62854	0.0130324	0.11605	0.667989	0.0136988	0.0791025	0.706019	0.0857795	0.7187	0.617284	0.0195164	0.232034	0.7	0.0209659	0.16139	0.733333	0.061637	0.501337	0.655556	>	9.28828	21	45	21	6	0.5	0.882353	0.777778	0.681818	0.709677	7.11204e-05	0
KIF23	5.25972	5.17937	5.55786	5.58076	0.344679	0.321775	0.401394	0.37849	0.00481766	0.0506095	0.671335	0.0223411	0.0941297	0.64951	0.0155126	0.447072	0.700436	0.0189442	0.141575	0.66336	0.0548309	0.190829	0.635417	0.0360007	0.653847	0.700617	0.0283728	0.263083	0.690476	0.0607959	0.269006	0.683333	0.0280635	0.44504	0.7	>	5.62709	21	45	21	6	0.5	0.882353	0.777778	0.681818	0.709677	7.11204e-05	0
RAPGEF3	5.12882	5.10808	4.9782	4.98645	-0.136271	-0.144517	-0.121631	-0.129877	3.91436e-05	0.00321009	0.736228	0.000402613	0.00614727	0.734477	0.00176131	0.378067	0.738562	0.000115946	0.00811858	0.741402	0.000786699	0.012277	0.738426	0.00253558	0.581574	0.74537	0.0132966	0.201221	0.72381	0.0252797	0.176516	0.725	0.0382447	0.473537	0.722222	<	5.12259	36	28	6	23	0.857143	0.54902	0.610169	0.823529	0.688172	7.33408e-05	0
ROBO4	6.03122	6.11261	5.80635	5.90212	-0.153045	-0.248807	-0.210491	-0.306253	0.000217415	0.00834392	0.730626	0.000346393	0.00553536	0.767157	0.0462265	0.526623	0.681917	0.00127038	0.0311864	0.707672	0.00110554	0.0153799	0.74537	0.0865179	0.718804	0.657407	0.000800021	0.0876316	0.785714	0.00102955	0.0477346	0.819444	0.03581	0.467187	0.740741	<	5.99967	36	28	6	23	0.857143	0.54902	0.610169	0.823529	0.688172	7.33408e-05	0
BANF1	10.5353	10.3735	10.7822	10.6484	0.160717	0.294475	0.274931	0.408689	0.000397343	0.0119918	0.71662	4.48216e-05	0.00137217	0.778595	0.0817279	0.586902	0.633987	0.00680076	0.0811666	0.678571	0.000410452	0.00777022	0.737269	0.233159	0.81365	0.600309	0.000776167	0.0876017	0.807937	5.07442e-05	0.0156066	0.877778	0.047792	0.488411	0.714815	>	10.4897	36	28	6	23	0.857143	0.54902	0.610169	0.823529	0.688172	7.33408e-05	0
FABP4	5.14432	4.8723	4.20811	4.44445	-0.61986	-0.856206	-0.427844	-0.66419	0.00123168	0.0226519	0.70028	0.00375619	0.0282612	0.731209	0.0685685	0.56434	0.659041	0.00137142	0.0323685	0.713624	0.00432133	0.0373229	0.743056	0.0640702	0.703735	0.674383	0.0114746	0.188953	0.668254	0.00715859	0.0984886	0.702778	0.14717	0.599537	0.622222	<	4.76893	36	28	6	23	0.857143	0.54902	0.610169	0.823529	0.688172	7.33408e-05	0
CKS2	10.2087	9.86898	10.4997	10.5223	0.413478	0.390898	0.653281	0.630701	0.000934255	0.019237	0.697946	0.00651126	0.0410361	0.702614	0.0140866	0.447072	0.691721	0.0102532	0.101774	0.67328	0.0269231	0.121084	0.677083	0.0446384	0.674858	0.66821	0.000467881	0.0797171	0.757143	0.00212051	0.0609809	0.763889	0.00721515	0.377587	0.748148	>	10.1046	36	28	6	23	0.857143	0.54902	0.610169	0.823529	0.688172	7.33408e-05	0
GHDC	5.95309	5.83175	5.56666	5.82792	-0.0894806	-0.35074	-0.00383222	-0.265091	0.00345055	0.0416797	0.681606	0.000547582	0.00761246	0.736928	0.343819	0.79574	0.607843	0.00280732	0.0494688	0.709656	0.000643635	0.0105994	0.760417	0.216475	0.812698	0.641975	0.189014	0.536881	0.614286	0.0529244	0.252148	0.680556	0.970646	0.992135	0.525926	<	5.95077	36	28	6	23	0.857143	0.54902	0.610169	0.823529	0.688172	7.33408e-05	0
ACAA1	7.95636	7.81708	7.59837	7.75322	-0.162175	-0.31703	-0.0638625	-0.218717	0.0002453	0.0089813	0.72409	9.62048e-05	0.00236851	0.80719	0.0738548	0.573594	0.61329	7.83503e-05	0.00672232	0.761905	2.84275e-05	0.00129452	0.849537	0.0313336	0.644689	0.645062	0.10769	0.430408	0.633333	0.0317686	0.196123	0.705556	0.580834	0.863309	0.537037	<	7.7691	29	37	13	14	0.690476	0.72549	0.674419	0.74	0.709677	7.39214e-05	0
TXNDC11	7.59586	7.78042	7.20208	7.41001	-0.24013	-0.448065	-0.370413	-0.578348	0.000406373	0.012089	0.72409	0.00052322	0.00737117	0.763072	0.0507923	0.537974	0.672113	0.0051004	0.069362	0.703042	0.00415732	0.03615	0.746528	0.13621	0.76197	0.645062	0.000741954	0.0852437	0.774603	0.00131543	0.0520484	0.802778	0.00855331	0.389751	0.737037	<	7.39298	29	37	13	14	0.690476	0.72549	0.674419	0.74	0.709677	7.39214e-05	0
FAM3C	5.3639	5.4613	5.08388	5.30016	-0.0923837	-0.308672	-0.161132	-0.377421	0.00324552	0.0402739	0.683473	0.000795643	0.0097821	0.765523	0.322163	0.78063	0.574074	0.00605285	0.0761022	0.693122	0.000670882	0.0109215	0.780093	0.396213	0.88638	0.57716	0.0161248	0.217658	0.660317	0.00955784	0.112859	0.730556	0.255199	0.690071	0.566667	<	5.24294	29	37	13	14	0.690476	0.72549	0.674419	0.74	0.709677	7.39214e-05	0
CCM2	7.93357	8.02459	7.74216	7.77459	-0.185755	-0.218184	-0.25	-0.28243	0.00707516	0.0635112	0.683007	0.0217245	0.0923636	0.678922	0.0623841	0.557728	0.688453	0.0370075	0.202591	0.661376	0.0714763	0.225768	0.658565	0.148472	0.772182	0.665123	0.00521444	0.147026	0.734921	0.0126786	0.128659	0.727778	0.0125031	0.398511	0.744444	<	7.85329	29	37	13	14	0.690476	0.72549	0.674419	0.74	0.709677	7.39214e-05	0
CWC27	5.71005	5.7216	6.04795	5.85925	0.145804	0.334502	0.137656	0.326354	1.04005e-05	0.00164638	0.747899	1.14328e-06	0.000115944	0.820261	0.0388441	0.509742	0.651416	6.04432e-05	0.0058416	0.746032	7.45753e-06	0.000526797	0.81713	0.0507182	0.685486	0.651235	0.00303369	0.124775	0.752381	0.000357811	0.0347233	0.827778	0.120276	0.5726	0.651852	>	5.81038	29	37	13	14	0.690476	0.72549	0.674419	0.74	0.709677	7.39214e-05	0
RNFT2	4.52765	4.26823	5.04601	4.75775	0.306398	0.594658	0.489524	0.777784	0.000579777	0.0146342	0.736695	0.000328766	0.00536082	0.781046	0.0680664	0.56434	0.67756	0.0119476	0.110782	0.704365	0.00605458	0.0468048	0.752315	0.229368	0.813429	0.640432	0.000483193	0.0797171	0.814286	0.000185521	0.0266817	0.85	0.00544104	0.370307	0.766667	>	4.45556	29	37	13	14	0.690476	0.72549	0.674419	0.74	0.709677	7.39214e-05	0
PRIM1	7.59209	7.43865	8.31627	7.95155	0.404591	0.769309	0.512901	0.877619	9.88185e-05	0.00528892	0.730626	5.70886e-05	0.00160967	0.778595	0.045721	0.525292	0.666667	0.000727232	0.022967	0.718254	0.000288658	0.00613238	0.767361	0.0842913	0.716763	0.652778	0.00134694	0.10004	0.760317	0.000621595	0.039956	0.805556	0.0458832	0.485421	0.7	>	7.96459	29	37	13	14	0.690476	0.72549	0.674419	0.74	0.709677	7.39214e-05	0
TAF1B	5.07901	4.98068	5.3444	5.4971	0.447009	0.294306	0.516414	0.363711	0.000124014	0.00611162	0.724556	0.00710031	0.0434851	0.690359	0.000323033	0.378067	0.770153	0.000385359	0.0155317	0.720238	0.00995625	0.0647059	0.68287	0.0002907	0.581574	0.770062	0.00406897	0.13881	0.734921	0.0310527	0.194417	0.708333	0.00628732	0.372852	0.77037	>	5.21996	29	37	13	14	0.690476	0.72549	0.674419	0.74	0.709677	7.39214e-05	0
ZBTB39	5.77512	5.76908	6.18703	5.95086	0.177518	0.413686	0.181781	0.417949	0.000198984	0.00789263	0.714753	2.88057e-05	0.00101588	0.769608	0.0778523	0.582682	0.641612	0.0012882	0.0313289	0.707672	0.000256716	0.00568329	0.761574	0.12357	0.74579	0.635802	0.00922584	0.176304	0.731746	0.00141049	0.0533025	0.788889	0.13426	0.586537	0.655556	>	5.86468	29	37	13	14	0.690476	0.72549	0.674419	0.74	0.709677	7.39214e-05	0
VIPR1	6.74129	6.65161	6.156	6.43932	-0.275593	-0.558913	-0.212288	-0.495609	8.73609e-06	0.00148841	0.751634	3.20147e-06	0.000228574	0.811275	0.0224831	0.470147	0.672113	1.1659e-05	0.00268835	0.759259	3.75531e-06	0.000330523	0.822917	0.0137651	0.587968	0.674383	0.00891387	0.174191	0.733333	0.00269988	0.0652638	0.783333	0.174016	0.625242	0.666667	<	6.15921	17	48	25	3	0.404762	0.941176	0.85	0.657534	0.698925	7.41816e-05	0
S100A3	5.74488	5.69428	5.30276	5.52158	-0.208414	-0.427233	-0.172699	-0.391519	0.00253469	0.0350412	0.716153	0.000502531	0.00717578	0.75	0.156618	0.663502	0.671024	0.00410112	0.0614584	0.723545	0.000674338	0.0109518	0.75463	0.156927	0.776711	0.682099	0.0709692	0.364154	0.698413	0.0157568	0.142984	0.738889	0.402265	0.776536	0.644444	<	5.09681	17	48	25	3	0.404762	0.941176	0.85	0.657534	0.698925	7.41816e-05	0
GBP6	7.34583	6.44427	4.83608	6.88668	-0.193978	-2.24458	0.442414	-1.60819	0.000138109	0.00640636	0.67507	6.50237e-08	1.96953e-05	0.802288	0.598138	0.89966	0.505447	4.15188e-05	0.00454758	0.712302	2.35124e-08	1.56679e-05	0.828704	0.20664	0.806752	0.557099	0.1989	0.54727	0.585714	0.00751956	0.0998827	0.738889	0.387491	0.769022	0.618519	<	4.74097	17	48	25	3	0.404762	0.941176	0.85	0.657534	0.698925	7.41816e-05	0
DOK4	5.7066	5.68244	5.35875	5.70855	0.00906013	-0.340744	0.0261139	-0.32369	0.0163191	0.103232	0.650794	0.000107129	0.00253146	0.75817	0.924791	0.985002	0.507625	0.031883	0.185884	0.643519	0.000558655	0.0095781	0.75	0.985819	0.998964	0.501543	0.144495	0.47957	0.668254	0.00451831	0.0816108	0.777778	0.832242	0.954731	0.522222	<	5.32301	17	48	25	3	0.404762	0.941176	0.85	0.657534	0.698925	7.41816e-05	0
TM2D2	10.0757	9.99136	9.59948	9.81215	-0.238736	-0.451409	-0.179204	-0.391876	0.00704708	0.0633445	0.645658	0.00538639	0.0362434	0.680556	0.164479	0.67333	0.599129	0.00970163	0.0988508	0.653439	0.00756182	0.054124	0.686343	0.156325	0.776711	0.609568	0.102169	0.421478	0.626984	0.0572537	0.261017	0.666667	0.370687	0.760221	0.574074	<	9.50828	17	48	25	3	0.404762	0.941176	0.85	0.657534	0.698925	7.41816e-05	0
CYSLTR2	4.38647	4.70695	4.48333	4.40951	-0.0712145	0.00260276	-0.297436	-0.223618	0.810416	0.905733	0.608777	0.986266	0.993272	0.588235	0.579101	0.894583	0.636166	0.582831	0.802658	0.582011	0.501742	0.711803	0.560185	0.792854	0.975416	0.611111	0.236086	0.583914	0.673016	0.403317	0.666836	0.655556	0.174529	0.626055	0.696296	<	4.19103	17	48	25	3	0.404762	0.941176	0.85	0.657534	0.698925	7.41816e-05	0
DDX20	6.4901	6.43684	6.99344	6.67848	0.204046	0.519	0.241645	0.5566	1.62361e-05	0.00210375	0.742764	1.56516e-06	0.000142841	0.808007	0.0507714	0.537974	0.655773	0.000234542	0.0118586	0.723545	2.80825e-05	0.00128761	0.790509	0.0996323	0.734793	0.634259	0.00100114	0.0910217	0.788889	0.000126821	0.0253667	0.85	0.0469998	0.486726	0.707407	>	7.02478	17	48	25	3	0.404762	0.941176	0.85	0.657534	0.698925	7.41816e-05	0
RAB9B	4.2831	4.43917	4.88978	4.62416	0.295164	0.560777	0.184995	0.450608	5.02159e-05	0.00357145	0.726891	2.21372e-05	0.000843561	0.759804	0.0044257	0.403314	0.683007	8.19343e-05	0.00682275	0.748016	4.41625e-05	0.00176218	0.783565	0.00160587	0.581574	0.700617	0.0692437	0.361637	0.67619	0.0386916	0.215185	0.702778	0.238431	0.676383	0.640741	>	4.77547	17	48	25	3	0.404762	0.941176	0.85	0.657534	0.698925	7.41816e-05	0
TXNL1	6.16845	6.07182	6.48515	6.45674	0.316717	0.345126	0.384926	0.413335	3.75265e-05	0.00314451	0.715686	0.000160999	0.00326092	0.722222	0.000836014	0.378067	0.706972	0.000926577	0.0260157	0.687169	0.00211433	0.0233942	0.693287	0.00644513	0.581574	0.679012	0.00176956	0.108232	0.784127	0.00269913	0.0652638	0.791667	0.00444275	0.36884	0.774074	>	6.53958	17	48	25	3	0.404762	0.941176	0.85	0.657534	0.698925	7.41816e-05	0
NUSAP1	8.18224	7.93798	8.78256	8.32367	0.213277	0.672162	0.385693	0.844579	0.000764857	0.0169892	0.714753	7.42907e-05	0.00195929	0.781863	0.224436	0.723662	0.625272	0.00669148	0.0801494	0.705026	0.000526856	0.00916682	0.766204	0.418874	0.894819	0.623457	0.00244635	0.115342	0.738095	0.000491718	0.0375188	0.819444	0.100751	0.548584	0.62963	>	8.85227	17	48	25	3	0.404762	0.941176	0.85	0.657534	0.698925	7.41816e-05	0
FGF19	4.07862	3.67696	5.84547	5.21155	1.25107	1.88499	1.53459	2.16851	5.63563e-05	0.00381265	0.681606	1.99319e-05	0.000795328	0.696078	0.00361962	0.396974	0.662309	0.00144481	0.0335072	0.660714	0.000620811	0.0103336	0.679398	0.024504	0.628517	0.635802	0.00417059	0.139212	0.731746	0.00182721	0.0580842	0.736111	0.0166417	0.409665	0.725926	>	5.11045	17	48	25	3	0.404762	0.941176	0.85	0.657534	0.698925	7.41816e-05	0
DACH1	3.79817	3.71069	4.76482	4.28901	0.516571	0.992381	0.578321	1.05413	0.000403842	0.0120887	0.665733	9.13464e-05	0.00227463	0.700163	0.0305295	0.49219	0.619826	0.00307814	0.0520162	0.656085	0.000881075	0.0131445	0.693287	0.0697881	0.703845	0.606481	0.0197842	0.232241	0.688889	0.00780021	0.101785	0.716667	0.0950121	0.54163	0.651852	>	4.58517	17	48	25	3	0.404762	0.941176	0.85	0.657534	0.698925	7.41816e-05	0
ZNF251	5.64775	5.85067	6.33479	5.78611	0.078677	0.62736	-0.0645607	0.484122	0.00327448	0.0405138	0.657796	6.17361e-05	0.00170701	0.767974	0.60563	0.901945	0.510893	0.00251491	0.0459138	0.675265	6.77297e-05	0.00235505	0.783565	0.391595	0.886235	0.530864	0.221257	0.569993	0.615873	0.0276038	0.183551	0.730556	0.745301	0.927728	0.537037	>	6.31602	17	48	25	3	0.404762	0.941176	0.85	0.657534	0.698925	7.41816e-05	0
RPL22	11.4375	11.5546	11.7358	11.5265	0.0546055	0.263901	-0.0280869	0.181208	0.0054472	0.0545293	0.651261	0.000447134	0.00662614	0.718137	0.41162	0.830149	0.562092	0.0036281	0.0566635	0.67791	0.000466585	0.00847184	0.736111	0.217485	0.812698	0.600309	0.351616	0.682176	0.587302	0.104414	0.349419	0.675	0.743694	0.927479	0.52963	>	11.7946	17	48	25	3	0.404762	0.941176	0.85	0.657534	0.698925	7.41816e-05	0
C5orf25	6.97503	6.94267	7.428	7.37534	0.409826	0.462485	0.432671	0.485329	0.00045814	0.0127381	0.701214	0.0033711	0.0261919	0.716503	0.0196361	0.467856	0.680828	0.00177745	0.0375217	0.687169	0.00843067	0.0581565	0.696759	0.0355985	0.652492	0.674383	0.00141228	0.100658	0.734921	0.0041286	0.0782321	0.763889	0.0144408	0.403349	0.696296	>	6.64769	42	15	0	36	1	0.294118	0.538462	1	0.612903	7.65944e-05	0
KIF20A	7.65408	7.63086	8.25258	7.96654	0.319285	0.605325	0.335672	0.621713	0.000957272	0.0195601	0.672736	0.000788247	0.00972706	0.707516	0.0906713	0.592812	0.626362	0.00118694	0.0298842	0.684524	0.000660616	0.0107983	0.717593	0.0745356	0.709743	0.640432	0.0241817	0.248845	0.644444	0.0184457	0.153618	0.683333	0.204251	0.647945	0.592593	>	7.20302	42	15	0	36	1	0.294118	0.538462	1	0.612903	7.65944e-05	0
LRP1	4.85889	4.85133	4.65427	4.78132	-0.0753439	-0.202392	-0.0700085	-0.197056	0.00154169	0.0261152	0.681139	0.000366485	0.00577791	0.753268	0.238696	0.735407	0.584967	0.00250978	0.045862	0.690476	0.000524744	0.00915372	0.756944	0.241419	0.815987	0.601852	0.0248439	0.25086	0.65873	0.00539533	0.0870526	0.744444	0.382239	0.766433	0.544444	<	5.00935	42	15	0	36	1	0.294118	0.538462	1	0.612903	7.65944e-05	0
MS4A2	3.52225	3.79372	3.24153	3.34856	-0.253539	-0.360566	-0.445169	-0.552196	0.00216317	0.0320326	0.623716	0.00625001	0.03988	0.65768	0.0876912	0.590049	0.578431	0.0181337	0.138522	0.584656	0.0262073	0.119125	0.618056	0.219421	0.812698	0.540123	9.01737e-05	0.0491217	0.71746	0.000604397	0.0391019	0.752778	0.0112807	0.393563	0.67037	<	3.84985	42	15	0	36	1	0.294118	0.538462	1	0.612903	7.65944e-05	0
C16orf89	5.68855	6.57604	5.17489	5.57803	-0.371549	-0.774683	-0.99801	-1.40114	0.0444738	0.186038	0.612979	0.0312376	0.117736	0.631536	0.38647	0.819023	0.588235	0.286956	0.57758	0.555556	0.170196	0.385497	0.5625	0.807949	0.978462	0.546296	0.000987712	0.0909924	0.750794	0.000277305	0.0300453	0.797222	0.0395959	0.476518	0.688889	<	7.35882	42	15	0	36	1	0.294118	0.538462	1	0.612903	7.65944e-05	0
SFTA3	4.85215	6.45577	4.62805	5.18187	-0.141937	-0.695757	-1.27391	-1.82773	0.334095	0.578477	0.567227	0.225336	0.422698	0.584967	0.832896	0.96409	0.543573	0.979358	0.991476	0.507937	0.710916	0.852461	0.501157	0.645275	0.948042	0.520062	0.00640768	0.158731	0.747619	0.00278666	0.0656903	0.786111	0.0793266	0.52441	0.696296	<	7.57089	42	15	0	36	1	0.294118	0.538462	1	0.612903	7.65944e-05	0
SCARF1	4.0128	4.09178	3.76668	3.85084	-0.185192	-0.269356	-0.240937	-0.325102	1.21839e-05	0.00176719	0.751167	2.63515e-05	0.000952608	0.789216	0.00851974	0.427184	0.700436	0.000168835	0.0101443	0.733466	0.000166328	0.00430707	0.770833	0.0230319	0.624736	0.683642	0.000223999	0.0632569	0.793651	0.000262226	0.0294504	0.833333	0.0119434	0.397188	0.740741	<	4.02921	38	24	4	27	0.904762	0.470588	0.584615	0.857143	0.666667	8.51368e-05	0
PLA2G4F	5.20699	5.05805	4.84469	4.95956	-0.203616	-0.318485	-0.0984824	-0.213351	3.62249e-05	0.00306853	0.741363	6.34147e-05	0.00173932	0.776144	0.0158304	0.447072	0.694989	5.1746e-06	0.00201048	0.782407	9.61337e-06	0.000616065	0.8125	0.00315725	0.581574	0.742284	0.0761473	0.373653	0.642857	0.0463142	0.235862	0.688889	0.369397	0.759266	0.581481	<	5.17596	38	24	4	27	0.904762	0.470588	0.584615	0.857143	0.666667	8.51368e-05	0
SEMA3F	6.97541	6.8667	6.57428	6.73996	-0.203474	-0.369156	-0.126735	-0.292418	0.000942991	0.0193347	0.679272	0.000647632	0.00848971	0.727124	0.0896659	0.591475	0.615468	0.0012251	0.0304614	0.684524	0.000940666	0.0137462	0.731481	0.0781566	0.711094	0.621914	0.0551003	0.33198	0.666667	0.016521	0.146419	0.716667	0.336247	0.740676	0.6	<	7.01687	38	24	4	27	0.904762	0.470588	0.584615	0.857143	0.666667	8.51368e-05	0
PECAM1	7.71311	7.94846	7.46991	7.47682	-0.305517	-0.312429	-0.471646	-0.478558	0.01062	0.0803274	0.660598	0.0364631	0.130028	0.664216	0.06829	0.56434	0.655773	0.0521681	0.242901	0.623016	0.102767	0.284189	0.626157	0.153361	0.775375	0.618827	0.00448393	0.141609	0.750794	0.0139672	0.134888	0.755556	0.0260681	0.438314	0.744444	<	7.93575	38	24	4	27	0.904762	0.470588	0.584615	0.857143	0.666667	8.51368e-05	0
PAICS	7.40853	7.46275	7.85781	7.9066	0.482117	0.433327	0.443846	0.395056	7.68775e-06	0.00138456	0.754435	9.76061e-05	0.00239416	0.761438	0.000311879	0.378067	0.745098	1.90729e-05	0.0031253	0.765873	9.73901e-05	0.00297856	0.773148	0.000390818	0.581574	0.756173	0.00840856	0.171308	0.726984	0.0141359	0.135665	0.733333	0.0255962	0.436634	0.718519	>	8.02102	15	49	27	2	0.357143	0.960784	0.882353	0.644737	0.688172	8.65722e-05	0
RSRC2	8.92943	8.87205	9.20071	9.08069	0.16814	0.288159	0.208642	0.328661	7.58609e-05	0.00456787	0.72409	9.19702e-05	0.00228679	0.752451	0.00801361	0.425064	0.686275	0.00083225	0.0246847	0.718915	0.000715321	0.0114583	0.743056	0.0187845	0.618488	0.686728	0.00434156	0.139793	0.736508	0.00519805	0.0860165	0.775	0.0197936	0.416279	0.685185	>	9.23272	15	49	27	2	0.357143	0.960784	0.882353	0.644737	0.688172	8.65722e-05	0
DPF2	8.59613	8.52414	8.93769	8.59157	0.0166166	0.36274	0.0674279	0.413551	0.00173538	0.0280289	0.695145	1.35567e-06	0.000128442	0.832516	0.846183	0.966674	0.511983	0.0116381	0.108949	0.685847	2.50664e-05	0.00119026	0.821759	0.961361	0.997732	0.50463	0.0101791	0.182176	0.71746	2.2066e-05	0.0133673	0.858333	0.556716	0.852625	0.52963	>	8.94105	15	49	27	2	0.357143	0.960784	0.882353	0.644737	0.688172	8.65722e-05	0
C10orf126	2.29246	2.26758	2.46023	2.40418	0.119034	0.175089	0.136598	0.192653	0.00224582	0.0325807	0.67507	0.0018611	0.0174919	0.684641	0.013566	0.447072	0.662309	0.0129255	0.11556	0.654101	0.0104917	0.0670973	0.657407	0.0440143	0.673218	0.649691	0.0508329	0.321465	0.725397	0.0464444	0.236072	0.75	0.0823629	0.52542	0.692593	>	2.44891	15	49	27	2	0.357143	0.960784	0.882353	0.644737	0.688172	8.65722e-05	0
NVL	7.22407	7.21715	7.50036	7.40532	0.183292	0.278327	0.188176	0.283211	0.000780575	0.0171668	0.672269	0.0005399	0.00755139	0.698529	0.0392477	0.51044	0.637255	0.00214482	0.0420519	0.67328	0.00104729	0.014817	0.701389	0.0497297	0.67999	0.635802	0.0307835	0.26979	0.669841	0.0185996	0.153939	0.691667	0.154449	0.607349	0.640741	>	7.70172	15	49	27	2	0.357143	0.960784	0.882353	0.644737	0.688172	8.65722e-05	0
DUXAP10	4.8151	4.95136	5.41859	5.40455	0.549376	0.56342	0.453192	0.467236	0.0016191	0.0269055	0.662932	0.00601922	0.0389923	0.662582	0.0076411	0.425064	0.663399	0.00352019	0.0554976	0.678571	0.010511	0.0671199	0.671296	0.0118333	0.583792	0.688272	0.0872831	0.397919	0.625397	0.112413	0.363	0.641667	0.0872522	0.534229	0.603704	>	5.8713	15	49	27	2	0.357143	0.960784	0.882353	0.644737	0.688172	8.65722e-05	0
PPP5C	6.01573	6.05621	6.29597	6.14842	0.120788	0.268332	0.0922139	0.239758	0.00126698	0.0230256	0.653595	1.27606e-05	0.000586432	0.767974	0.139746	0.646794	0.501089	0.00330501	0.0539797	0.669974	5.94473e-05	0.00216075	0.778935	0.159101	0.778843	0.524691	0.0893587	0.402789	0.614286	0.00610879	0.0918202	0.741667	0.47557	0.815572	0.555556	>	6.35783	15	49	27	2	0.357143	0.960784	0.882353	0.644737	0.688172	8.65722e-05	0
EXOC6	5.31079	5.39072	5.45664	5.67931	0.34501	0.122342	0.288584	0.0659163	0.0155549	0.100276	0.625117	0.207357	0.401589	0.57598	0.00125904	0.378067	0.690632	0.0207954	0.148102	0.641534	0.189016	0.408368	0.592593	0.00249093	0.581574	0.70679	0.264872	0.610629	0.585714	0.651302	0.837479	0.536111	0.058579	0.499213	0.651852	>	5.7617	15	49	27	2	0.357143	0.960784	0.882353	0.644737	0.688172	8.65722e-05	0
TUSC1	7.94298	8.1043	8.39627	7.96886	-0.021562	0.405845	-0.135433	0.291973	0.214718	0.454852	0.624183	0.045425	0.151105	0.705882	0.921055	0.983748	0.515251	0.191215	0.476631	0.62963	0.0493602	0.178506	0.707176	0.915872	0.9904	0.526235	0.69115	0.87931	0.611111	0.296671	0.57385	0.702778	0.637043	0.8858	0.511111	>	8.71983	15	49	27	2	0.357143	0.960784	0.882353	0.644737	0.688172	8.65722e-05	0
AGFG2	4.80847	4.79944	4.64778	4.74907	-0.0567439	-0.15803	-0.050373	-0.151659	0.000582339	0.0146567	0.695145	0.000107651	0.0025408	0.775327	0.172548	0.680758	0.588235	0.00173343	0.036983	0.693122	0.000400511	0.0076297	0.775463	0.192233	0.793995	0.583333	0.02261	0.24382	0.7	0.00544342	0.0873426	0.775	0.320153	0.730938	0.6	<	4.62733	15	49	27	2	0.357143	0.960784	0.882353	0.644737	0.688172	8.65722e-05	0
TLR9	4.78448	4.87825	4.60853	4.58847	-0.223593	-0.203533	-0.289784	-0.269723	0.00111997	0.0214865	0.694211	0.0118574	0.0615171	0.686275	0.0043444	0.403314	0.704793	0.0106035	0.103437	0.669974	0.0487698	0.177388	0.667824	0.0190662	0.620524	0.67284	0.00335391	0.128939	0.752381	0.018166	0.152587	0.730556	0.00173797	0.317632	0.781481	<	4.41357	15	49	27	2	0.357143	0.960784	0.882353	0.644737	0.688172	8.65722e-05	0
MAPKAPK3	7.429	7.4206	7.05805	7.28595	-0.140574	-0.368471	-0.134644	-0.362541	0.000468734	0.0129605	0.692344	0.000103903	0.00248757	0.750817	0.116179	0.620356	0.614379	0.00187606	0.0386245	0.687169	0.000523307	0.00914461	0.748843	0.146803	0.771425	0.604938	0.0182662	0.226948	0.704762	0.00532987	0.0864301	0.755556	0.187314	0.635432	0.637037	<	7.00449	15	49	27	2	0.357143	0.960784	0.882353	0.644737	0.688172	8.65722e-05	0
GIPC1	8.65678	8.33536	7.98268	8.47634	-0.0859049	-0.579562	0.14098	-0.352677	0.000831668	0.0178769	0.69141	1.16466e-05	0.000546543	0.789216	0.495567	0.868028	0.561002	0.000212299	0.0113903	0.738095	5.40563e-06	0.00042713	0.820602	0.182073	0.788784	0.628086	0.363744	0.691639	0.579365	0.0341944	0.203326	0.713889	0.311788	0.727125	0.6	<	8.00019	15	49	27	2	0.357143	0.960784	0.882353	0.644737	0.688172	8.65722e-05	0
KLF9	5.28242	5.31011	5.02059	5.05558	-0.234983	-0.269977	-0.25453	-0.289524	0.00141636	0.0248048	0.685808	0.00423363	0.0307579	0.694444	0.0162423	0.447072	0.674292	0.00646032	0.0785947	0.67791	0.0135148	0.0785025	0.688657	0.0364014	0.654407	0.66358	0.0205068	0.234593	0.704762	0.0273791	0.183087	0.708333	0.0401309	0.478793	0.7	<	4.84105	15	49	27	2	0.357143	0.960784	0.882353	0.644737	0.688172	8.65722e-05	0
KLK12	6.38146	5.87594	5.45322	6.25959	0.0268106	-0.779553	0.383647	-0.422717	0.0412528	0.178022	0.673669	0.00111923	0.0123821	0.800654	0.928929	0.985191	0.504357	0.0161326	0.129687	0.691799	0.000526871	0.00916682	0.805556	0.717994	0.963188	0.540123	0.764087	0.911517	0.630159	0.0250254	0.175601	0.788889	0.252932	0.689391	0.581481	<	5.27193	15	49	27	2	0.357143	0.960784	0.882353	0.644737	0.688172	8.65722e-05	0
CYP2C18	6.3535	5.21798	4.53296	5.56188	-0.457641	-1.48657	0.343902	-0.685023	0.00380005	0.0439978	0.6676	0.00080413	0.00985502	0.75817	0.318912	0.777841	0.546841	0.000441987	0.0167787	0.710317	0.00012268	0.00348863	0.791667	0.0928844	0.729833	0.601852	0.614362	0.841738	0.565079	0.206221	0.483153	0.677778	0.507848	0.830538	0.585185	<	3.63288	15	49	27	2	0.357143	0.960784	0.882353	0.644737	0.688172	8.65722e-05	0
SEMA4B	9.76757	9.69701	8.73585	9.5426	-0.204213	-1.01097	-0.154401	-0.961157	0.00032162	0.0104886	0.665733	9.83975e-07	0.000104631	0.795752	0.344599	0.79574	0.507625	0.000862299	0.0251653	0.669312	3.63762e-06	0.000324404	0.799769	0.327701	0.86021	0.50463	0.0355862	0.281644	0.657143	0.00128093	0.051432	0.786111	0.621083	0.878081	0.514815	<	8.50522	15	49	27	2	0.357143	0.960784	0.882353	0.644737	0.688172	8.65722e-05	0
DPP7	6.1033	6.11913	5.86141	6.02337	-0.0845881	-0.246548	-0.0957581	-0.257718	0.0190277	0.112572	0.651261	0.00531156	0.035825	0.706699	0.314614	0.776187	0.577342	0.0459755	0.22726	0.652116	0.0156223	0.0867032	0.703704	0.39103	0.886137	0.583333	0.11872	0.44553	0.649206	0.0553881	0.257323	0.713889	0.406128	0.779025	0.562963	<	5.69935	15	49	27	2	0.357143	0.960784	0.882353	0.644737	0.688172	8.65722e-05	0
ST8SIA3	3.07741	3.12368	3.16282	3.01787	-0.0731492	0.071799	-0.10581	0.0391383	0.869585	0.937323	0.647059	0.345176	0.549296	0.607843	0.015571	0.447072	0.699346	0.73792	0.887271	0.619048	0.341701	0.574223	0.579861	0.0689591	0.703845	0.671296	0.82882	0.938059	0.714286	0.774748	0.902563	0.675	0.0137547	0.401502	0.766667	<	2.9612	15	49	27	2	0.357143	0.960784	0.882353	0.644737	0.688172	8.65722e-05	0
ACVR1	8.93551	8.9466	8.62805	8.74281	-0.195962	-0.310719	-0.203788	-0.318545	0.011246	0.0828455	0.64239	0.00853412	0.0494079	0.670752	0.0920169	0.595216	0.604575	0.023718	0.157733	0.64418	0.0158478	0.0872521	0.672454	0.110273	0.737742	0.606481	0.121162	0.449296	0.638095	0.0986235	0.339343	0.666667	0.262451	0.695792	0.6	<	8.41404	15	49	27	2	0.357143	0.960784	0.882353	0.644737	0.688172	8.65722e-05	0
ARL4D	5.66518	5.57424	5.21136	5.58915	-0.0492808	-0.427068	0.0149063	-0.362881	0.00639251	0.0598281	0.633053	0.000255456	0.00449941	0.700163	0.627108	0.909471	0.543573	0.00889317	0.0940653	0.649471	0.000634954	0.0105024	0.711806	0.49424	0.915287	0.566358	0.186287	0.532876	0.593651	0.0357212	0.207106	0.672222	0.905925	0.975265	0.511111	<	4.99484	15	49	27	2	0.357143	0.960784	0.882353	0.644737	0.688172	8.65722e-05	0
SMURF1	6.57801	6.31233	6.18991	6.50135	0.00147739	-0.309961	0.189014	-0.122424	0.0616289	0.223598	0.61578	0.00311087	0.0248463	0.681373	0.990151	0.99766	0.528322	0.0165324	0.131383	0.65873	0.000741217	0.0117507	0.726852	0.554102	0.927413	0.567901	0.937327	0.97844	0.512698	0.360121	0.629794	0.572222	0.239741	0.677644	0.566667	<	6.01779	15	49	27	2	0.357143	0.960784	0.882353	0.644737	0.688172	8.65722e-05	0
MMS19	7.77671	7.74141	7.54398	7.68886	-0.0774701	-0.222351	-0.0525499	-0.197431	0.0395693	0.173609	0.614846	0.013362	0.0663336	0.665033	0.388733	0.819496	0.54793	0.0459201	0.227056	0.626323	0.0152616	0.0854368	0.672454	0.340043	0.868201	0.564815	0.295091	0.635031	0.587302	0.168736	0.439464	0.647222	0.702457	0.913066	0.507407	<	7.38196	15	49	27	2	0.357143	0.960784	0.882353	0.644737	0.688172	8.65722e-05	0
PCK2	7.72002	7.45402	7.31149	7.64641	0.00462977	-0.330292	0.19239	-0.142532	0.14964	0.370918	0.596172	0.0229764	0.0959117	0.648693	0.97781	0.994216	0.526144	0.0771244	0.300603	0.624339	0.0139347	0.0800714	0.673611	0.697192	0.958369	0.558642	0.99565	0.9992	0.528571	0.41282	0.674113	0.588889	0.349998	0.74754	0.551852	<	7.09113	15	49	27	2	0.357143	0.960784	0.882353	0.644737	0.688172	8.65722e-05	0
LOC253724	3.04031	3.06394	3.00889	3.01076	-0.0364944	-0.0383625	-0.0531747	-0.0550428	0.153292	0.375869	0.592437	0.204462	0.398538	0.601307	0.26748	0.753437	0.58061	0.308655	0.599163	0.576058	0.35755	0.590628	0.583333	0.422905	0.896385	0.566358	0.199048	0.547462	0.631746	0.232253	0.511791	0.644444	0.270735	0.70203	0.614815	<	2.91078	15	49	27	2	0.357143	0.960784	0.882353	0.644737	0.688172	8.65722e-05	0
IFI16	10.2078	10.2154	9.93112	10.1345	-0.0755345	-0.278935	-0.0809057	-0.284306	0.20272	0.440449	0.546685	0.125814	0.293264	0.538399	0.615001	0.904899	0.557734	0.277949	0.568556	0.550265	0.188435	0.407452	0.543981	0.663237	0.952635	0.558642	0.422342	0.730493	0.538095	0.325599	0.599525	0.525	0.679141	0.903387	0.555556	<	9.64424	15	49	27	2	0.357143	0.960784	0.882353	0.644737	0.688172	8.65722e-05	0
RNPEPL1	6.91138	6.91594	6.56553	6.74199	-0.170727	-0.347183	-0.173945	-0.350401	3.11216e-05	0.00282796	0.741363	1.97116e-05	0.000789689	0.781863	0.0363439	0.505664	0.687364	0.000227965	0.011672	0.738095	0.000142391	0.00387285	0.771991	0.0596533	0.695432	0.692901	0.00132105	0.10004	0.749206	0.000475205	0.0372816	0.805556	0.0405038	0.480256	0.674074	<	6.68589	24	42	18	9	0.571429	0.823529	0.727273	0.7	0.709677	9.02981e-05	0
RTTN	4.40272	4.56865	4.74782	4.56434	0.112816	0.296293	-0.00430625	0.17917	0.000468636	0.0129605	0.739029	4.04257e-05	0.00126868	0.808824	0.150168	0.656731	0.645969	4.13967e-05	0.00454758	0.779101	1.53735e-06	0.000185139	0.84838	0.0318262	0.650549	0.686728	0.299529	0.638476	0.642857	0.0866878	0.31873	0.713889	0.970469	0.992119	0.548148	>	4.57922	24	42	18	9	0.571429	0.823529	0.727273	0.7	0.709677	9.02981e-05	0
A2ML1	4.76872	4.15011	3.60923	4.33232	-0.254454	-0.977539	0.182208	-0.540877	0.00131779	0.0235424	0.715686	5.29733e-05	0.00152812	0.808007	0.336813	0.790842	0.592593	0.000206639	0.0112461	0.760582	7.88653e-06	0.000547429	0.841435	0.116494	0.741665	0.652778	0.427142	0.733511	0.607937	0.0648088	0.276308	0.727778	0.582213	0.863477	0.551852	<	3.6696	24	42	18	9	0.571429	0.823529	0.727273	0.7	0.709677	9.02981e-05	0
TMPRSS11E	6.70246	5.79838	4.17386	6.03025	-0.4063	-2.26269	0.231874	-1.62451	0.000515024	0.0135829	0.711018	3.07675e-06	0.000223789	0.832516	0.469098	0.856295	0.54902	0.000108559	0.00788331	0.75	2.49117e-07	5.82648e-05	0.87037	0.234999	0.813708	0.589506	0.164545	0.504994	0.61746	0.00526594	0.0860165	0.741667	0.756213	0.931915	0.548148	<	4.41064	24	42	18	9	0.571429	0.823529	0.727273	0.7	0.709677	9.02981e-05	0
METTL10	5.24129	5.1791	5.50601	5.31587	0.0928676	0.28301	0.136767	0.326909	0.0029971	0.0387548	0.704482	0.000476257	0.00689417	0.770425	0.287708	0.764344	0.616558	0.0169333	0.132855	0.681217	0.00339572	0.0317362	0.744213	0.443765	0.902343	0.597222	0.00820232	0.170088	0.760317	0.00100369	0.0473045	0.833333	0.171234	0.623246	0.662963	>	5.43489	24	42	18	9	0.571429	0.823529	0.727273	0.7	0.709677	9.02981e-05	0
CXorf36	4.56784	4.62615	4.40661	4.47093	-0.114054	-0.178381	-0.155214	-0.219541	0.00097988	0.0198267	0.690476	0.00127529	0.013568	0.734477	0.070622	0.569516	0.631808	0.00445432	0.0644036	0.672619	0.00344431	0.0321003	0.717593	0.123396	0.74579	0.612654	0.0036169	0.13368	0.733333	0.00348091	0.0728818	0.775	0.0694057	0.512746	0.677778	<	4.39284	24	42	18	9	0.571429	0.823529	0.727273	0.7	0.709677	9.02981e-05	0
PLCD1	7.45119	7.24647	6.86388	7.30183	-0.0891479	-0.527101	0.0553604	-0.382592	0.036863	0.166237	0.676937	0.00795047	0.0468862	0.775327	0.670631	0.920719	0.545752	0.0272023	0.171007	0.698413	0.00710776	0.0521627	0.793981	0.508482	0.919499	0.570988	0.370353	0.694751	0.625397	0.113193	0.364564	0.730556	0.811492	0.9481	0.514815	<	6.80217	24	42	18	9	0.571429	0.823529	0.727273	0.7	0.709677	9.02981e-05	0
RNF149	10.2223	10.0445	9.6855	10.15	-0.0200595	-0.484528	0.10544	-0.359028	0.00124649	0.0228611	0.672736	4.11337e-07	5.63222e-05	0.825163	0.84945	0.966937	0.530501	0.000805782	0.0242596	0.70172	4.52848e-07	8.7892e-05	0.847222	0.533062	0.923276	0.507716	0.233564	0.58241	0.603175	0.00324413	0.0708781	0.772222	0.466937	0.810444	0.622222	<	9.91965	24	42	18	9	0.571429	0.823529	0.727273	0.7	0.709677	9.02981e-05	0
PIBF1	7.11961	7.01943	7.53921	7.22223	0.132088	0.449069	0.202801	0.519783	0.0102587	0.0788845	0.671802	0.00220433	0.0197166	0.731209	0.369177	0.810617	0.592593	0.0421271	0.217108	0.656085	0.0116555	0.0716005	0.712963	0.535061	0.923997	0.580247	0.0273953	0.26111	0.709524	0.00716334	0.0984886	0.775	0.220135	0.661021	0.622222	>	7.45254	24	42	18	9	0.571429	0.823529	0.727273	0.7	0.709677	9.02981e-05	0
ZKSCAN2	5.56529	5.57691	5.81708	5.64441	0.0757017	0.248371	0.0675007	0.24017	0.0206779	0.118241	0.664799	0.00457305	0.032361	0.716503	0.437432	0.842944	0.595861	0.036374	0.200811	0.666667	0.00947042	0.0625242	0.717593	0.462496	0.906723	0.598765	0.122969	0.451382	0.660317	0.0316846	0.19587	0.713889	0.580816	0.863309	0.588889	>	5.70534	24	42	18	9	0.571429	0.823529	0.727273	0.7	0.709677	9.02981e-05	0
SPTB	5.42563	5.4435	5.36634	5.39735	-0.0335362	-0.0645473	-0.0461467	-0.0771579	0.164995	0.392948	0.628385	0.13817	0.311124	0.696078	0.38976	0.819496	0.538126	0.282371	0.572841	0.612434	0.236997	0.465677	0.677083	0.519586	0.921849	0.526235	0.303318	0.641248	0.666667	0.279279	0.556721	0.741667	0.424054	0.788107	0.566667	<	5.35468	24	42	18	9	0.571429	0.823529	0.727273	0.7	0.709677	9.02981e-05	0
NKRF	7.77517	7.66458	7.9731	7.98197	0.239323	0.230459	0.317388	0.308524	0.00202177	0.0306423	0.704482	0.0101256	0.0556407	0.718137	0.0205164	0.469558	0.686275	0.0123527	0.11256	0.684524	0.0325819	0.136837	0.696759	0.0529537	0.689191	0.66821	0.00415048	0.139212	0.752381	0.00934558	0.111472	0.769444	0.0203222	0.416279	0.72963	>	7.51519	42	14	0	37	1	0.27451	0.531646	1	0.602151	9.072e-05	0
HMGB3	8.61914	8.70573	9.13962	9.07087	0.426264	0.495009	0.36514	0.433885	0.000420727	0.0121432	0.690943	0.00184423	0.0173988	0.684641	0.0129459	0.447072	0.699346	0.000975639	0.0267178	0.700397	0.00337451	0.0315971	0.693287	0.017396	0.617093	0.709877	0.022142	0.242277	0.668254	0.0263097	0.180194	0.663889	0.0607254	0.501105	0.674074	>	8.06035	42	14	0	37	1	0.27451	0.531646	1	0.602151	9.072e-05	0
WIPF3	4.82165	4.72643	5.12811	5.09895	0.305302	0.334468	0.372522	0.401688	0.0157057	0.10079	0.680205	0.040185	0.138794	0.691993	0.0853409	0.586902	0.664488	0.0463474	0.228146	0.675265	0.0859333	0.254843	0.68287	0.149372	0.772307	0.665123	0.0274725	0.261401	0.692063	0.0437946	0.229128	0.713889	0.0619961	0.501337	0.662963	>	4.34741	42	14	0	37	1	0.27451	0.531646	1	0.602151	9.072e-05	0
RAET1E	3.76442	3.37192	3.16178	3.29376	-0.355214	-0.487198	-0.0781539	-0.210138	9.6359e-05	0.00524881	0.748833	0.000633183	0.0083733	0.811275	0.0284713	0.489406	0.665577	9.20443e-06	0.00255984	0.799603	0.000139289	0.00382753	0.859954	0.0084882	0.581574	0.719136	0.0609972	0.344365	0.626984	0.0268325	0.181755	0.694444	0.483515	0.818425	0.537037	<	3.78558	42	14	0	37	1	0.27451	0.531646	1	0.602151	9.072e-05	0
VCL	6.29148	6.25569	5.95876	6.17554	-0.105413	-0.322198	-0.0801486	-0.296933	0.00029657	0.0098812	0.710551	4.95256e-05	0.00146027	0.762255	0.110714	0.613052	0.641612	0.000826202	0.0246516	0.720238	0.000195109	0.00472778	0.770833	0.100787	0.734793	0.652778	0.0347276	0.278361	0.687302	0.0113162	0.12288	0.741667	0.296139	0.718286	0.614815	<	6.49251	42	14	0	37	1	0.27451	0.531646	1	0.602151	9.072e-05	0
LOC100144603	6.31788	6.14827	5.9516	6.06726	-0.200736	-0.316397	-0.0810157	-0.196677	0.0126176	0.0888166	0.621382	0.0148111	0.0710876	0.652778	0.180046	0.688679	0.579521	0.00520173	0.0702187	0.656085	0.00631404	0.0481037	0.6875	0.104635	0.73572	0.614198	0.294731	0.63451	0.538095	0.203275	0.479943	0.569444	0.655998	0.894049	0.503704	<	6.64588	42	14	0	37	1	0.27451	0.531646	1	0.602151	9.072e-05	0
LRRN4	3.88905	4.24979	3.63787	3.85827	-0.13688	-0.357277	-0.391518	-0.611915	0.0172578	0.106285	0.576097	0.0102633	0.0561505	0.633987	0.396072	0.821848	0.501089	0.165572	0.444367	0.510582	0.0725913	0.228081	0.547454	0.851569	0.982988	0.587963	4.68464e-05	0.037114	0.784127	3.02862e-05	0.0143733	0.841667	0.0213557	0.422286	0.707407	<	4.5281	42	14	0	37	1	0.27451	0.531646	1	0.602151	9.072e-05	0
PDZK1IP1	7.85128	7.80795	6.15892	6.97188	-0.86666	-1.67961	-0.836076	-1.64903	2.5009e-05	0.00252503	0.736695	1.16388e-05	0.000546543	0.787582	0.0346463	0.500082	0.668845	0.000109233	0.00788331	0.732143	4.55674e-05	0.00181101	0.780093	0.0458783	0.677709	0.66821	0.00206505	0.112526	0.747619	0.000422693	0.0361419	0.805556	0.0800071	0.52542	0.67037	<	7.7536	35	29	7	22	0.833333	0.568627	0.614035	0.805556	0.688172	9.57565e-05	0
TRH	4.17689	4.20075	4.30074	4.30988	0.125974	0.11683	0.109127	0.0999825	0.00221609	0.0324729	0.690943	0.010781	0.0580768	0.707516	0.0207251	0.469558	0.668845	0.00337531	0.054416	0.675926	0.0123267	0.0742408	0.695602	0.0245723	0.628517	0.649691	0.0612921	0.344861	0.726984	0.0857312	0.317145	0.736111	0.125535	0.576946	0.714815	>	4.18152	35	29	7	22	0.833333	0.568627	0.614035	0.805556	0.688172	9.57565e-05	0
CDC40	7.40015	7.31624	7.82265	7.61717	0.241698	0.447182	0.300931	0.506416	0.000127004	0.00617745	0.731559	6.38273e-05	0.00174791	0.760621	0.043051	0.520557	0.69281	0.00103434	0.0273511	0.720899	0.000391242	0.00752774	0.746528	0.084891	0.717031	0.686728	0.00209343	0.112526	0.757143	0.000799776	0.044045	0.794444	0.0508176	0.488411	0.707407	>	7.83345	22	44	20	7	0.52381	0.862745	0.758621	0.6875	0.709677	9.62441e-05	0
ATP5G2	7.56882	7.64028	7.73756	7.76062	0.170786	0.14772	0.120338	0.0972725	0.000185754	0.00751704	0.718021	0.0025461	0.0216961	0.718137	0.00183445	0.378067	0.717865	0.000168146	0.0101443	0.733466	0.00184648	0.0213586	0.731481	0.00147651	0.581574	0.736111	0.0781947	0.378925	0.680952	0.137324	0.399814	0.686111	0.0895609	0.535486	0.674074	>	7.75277	22	44	20	7	0.52381	0.862745	0.758621	0.6875	0.709677	9.62441e-05	0
RRP15	6.68363	6.59597	7.08475	6.9719	0.314058	0.426911	0.375935	0.488789	0.000565937	0.0144271	0.699346	0.000789387	0.00973512	0.721405	0.0221487	0.469558	0.669935	0.00310354	0.0522246	0.689153	0.0028347	0.0282354	0.71412	0.0438743	0.673131	0.655864	0.00996143	0.181365	0.72381	0.00889307	0.108833	0.738889	0.054799	0.493685	0.703704	>	7.02913	22	44	20	7	0.52381	0.862745	0.758621	0.6875	0.709677	9.62441e-05	0
TACC3	7.31428	7.26638	7.71771	7.6063	0.306113	0.417518	0.339924	0.45133	0.00128117	0.0231501	0.693744	0.000421853	0.00635514	0.746732	0.0428452	0.520386	0.623094	0.00487745	0.067618	0.695106	0.00107323	0.0150772	0.751157	0.0722039	0.703845	0.62037	0.0309416	0.270347	0.690476	0.0102933	0.117786	0.736111	0.153092	0.605314	0.62963	>	7.68235	22	44	20	7	0.52381	0.862745	0.758621	0.6875	0.709677	9.62441e-05	0
MAP3K4	8.29928	8.44064	8.71371	8.59376	0.252901	0.37285	0.153117	0.273066	0.000478121	0.0130933	0.690009	0.000889906	0.0105768	0.719771	0.0212138	0.469558	0.650327	0.000266747	0.0128805	0.719577	0.000506141	0.00895422	0.748843	0.00770731	0.581574	0.680556	0.113855	0.439507	0.619048	0.0976961	0.337605	0.65	0.29838	0.719792	0.577778	>	8.70845	22	44	20	7	0.52381	0.862745	0.758621	0.6875	0.709677	9.62441e-05	0
KIAA1919	4.78603	4.73039	5.00031	4.99516	0.225497	0.230648	0.264774	0.269926	0.00348728	0.0419965	0.673669	0.0148371	0.0711292	0.651961	0.015279	0.447072	0.702614	0.0142658	0.121254	0.662037	0.0384419	0.151876	0.642361	0.0330942	0.651192	0.688272	0.0255447	0.253431	0.701587	0.0535502	0.253438	0.675	0.0300343	0.451257	0.737037	>	5.06114	22	44	20	7	0.52381	0.862745	0.758621	0.6875	0.709677	9.62441e-05	0
S100A16	11.5955	11.3875	10.4556	11.2838	-0.250488	-1.07872	-0.103655	-0.93189	4.91413e-06	0.00114199	0.747899	9.40354e-09	4.59036e-06	0.857843	0.136869	0.644386	0.601307	1.31645e-05	0.00268835	0.771164	6.39438e-08	2.5566e-05	0.861111	0.0875233	0.720795	0.651235	0.0145472	0.208313	0.692063	0.000269281	0.0297414	0.85	0.607071	0.872961	0.518519	<	10.8583	22	44	20	7	0.52381	0.862745	0.758621	0.6875	0.709677	9.62441e-05	0
TMPRSS4	9.84126	9.40129	7.99652	9.43995	-0.271908	-1.71534	0.0386624	-1.40477	7.80551e-05	0.00461656	0.723156	3.68585e-07	5.189e-05	0.815359	0.300602	0.769053	0.600218	9.57637e-05	0.00730691	0.75463	1.03406e-06	0.000142906	0.835648	0.137755	0.763512	0.646605	0.0724836	0.367589	0.647619	0.00526427	0.0860165	0.766667	0.905049	0.975249	0.511111	<	9.00833	22	44	20	7	0.52381	0.862745	0.758621	0.6875	0.709677	9.62441e-05	0
GLYCTK	5.00417	4.9684	4.83726	4.96091	-0.032742	-0.156392	-0.0074964	-0.131147	0.015994	0.101924	0.704482	7.80422e-05	0.00203143	0.777778	0.576949	0.894231	0.606754	0.0223443	0.153231	0.712963	0.000191443	0.00467294	0.782407	0.523299	0.921849	0.62037	0.256972	0.605297	0.684127	0.0101655	0.117196	0.766667	0.935074	0.981778	0.574074	<	4.86013	22	44	20	7	0.52381	0.862745	0.758621	0.6875	0.709677	9.62441e-05	0
GATA2	5.49866	5.62873	5.3439	5.39178	-0.145136	-0.193017	-0.23695	-0.28483	0.000599331	0.0147745	0.701681	0.001168	0.0127523	0.714052	0.0278641	0.487435	0.685185	0.00969913	0.0988508	0.671958	0.00890301	0.060271	0.688657	0.100864	0.734793	0.649691	0.000653566	0.0826927	0.773016	0.00107176	0.0482556	0.775	0.0122025	0.398511	0.77037	<	5.34973	22	44	20	7	0.52381	0.862745	0.758621	0.6875	0.709677	9.62441e-05	0
ADCK5	5.71116	5.63979	5.43523	5.41751	-0.272657	-0.254936	-0.222281	-0.20456	0.00297519	0.0386717	0.701214	0.0170913	0.0788171	0.705065	0.0152226	0.447072	0.696078	0.00399075	0.060393	0.714286	0.0189897	0.0978664	0.71875	0.0155761	0.604936	0.708333	0.0890424	0.402217	0.669841	0.149997	0.415549	0.672222	0.0985316	0.545756	0.666667	<	5.27874	22	44	20	7	0.52381	0.862745	0.758621	0.6875	0.709677	9.62441e-05	0
CRTAP	8.0302	7.99441	7.55686	7.92564	-0.0940344	-0.462814	-0.0687742	-0.437553	0.0001713	0.00716414	0.69141	3.02751e-06	0.000221696	0.764706	0.222397	0.723044	0.593682	0.000793111	0.0240286	0.699735	3.40707e-05	0.00146698	0.768519	0.225353	0.813349	0.608025	0.027947	0.262249	0.671429	0.0032157	0.0705654	0.755556	0.435864	0.793	0.559259	<	7.77789	22	44	20	7	0.52381	0.862745	0.758621	0.6875	0.709677	9.62441e-05	0
CCL24	4.57701	4.51463	4.5524	4.41543	-0.143232	-0.00626472	-0.0991936	0.0377733	0.403236	0.638368	0.620448	0.946192	0.973862	0.609477	0.0780403	0.58286	0.635076	0.350226	0.638171	0.62963	0.815582	0.909747	0.615741	0.0698683	0.703845	0.648148	0.869467	0.953247	0.598413	0.798564	0.915057	0.594444	0.367511	0.757737	0.603704	<	4.31093	22	44	20	7	0.52381	0.862745	0.758621	0.6875	0.709677	9.62441e-05	0
PHOSPHO2	4.63578	4.5557	5.01845	4.75738	0.14515	0.406224	0.201674	0.462748	0.000359747	0.0111499	0.724556	5.8907e-05	0.00164471	0.798203	0.171668	0.680683	0.626362	0.00271298	0.0482091	0.714947	0.000448399	0.00825723	0.792824	0.283535	0.837404	0.611111	0.00166386	0.10661	0.747619	0.000245346	0.0290953	0.811111	0.095076	0.54163	0.662963	>	4.85145	25	41	17	10	0.595238	0.803922	0.714286	0.706897	0.709677	9.98485e-05	0
PRPF38A	7.48024	7.52604	8.02493	7.66036	0.166648	0.531221	0.134321	0.498894	3.34559e-05	0.00293804	0.724556	9.9585e-07	0.000105334	0.792484	0.0783075	0.583312	0.633987	0.000160032	0.00996637	0.725529	8.51164e-06	0.0005768	0.792824	0.0806877	0.714354	0.635802	0.0144927	0.208313	0.722222	0.00176882	0.0578151	0.791667	0.2637	0.697398	0.62963	>	7.76437	25	41	17	10	0.595238	0.803922	0.714286	0.706897	0.709677	9.98485e-05	0
SBSN	6.48293	5.1652	4.04185	5.50687	-0.588491	-2.05351	0.341673	-1.12334	0.000324726	0.0105196	0.721989	1.67073e-05	0.000708243	0.845997	0.287182	0.763646	0.556645	2.31438e-05	0.00342717	0.779431	1.20698e-06	0.000158742	0.889468	0.0915766	0.727847	0.632716	0.281652	0.625937	0.584127	0.0103053	0.117789	0.741667	0.568286	0.858287	0.625926	<	4.22484	25	41	17	10	0.595238	0.803922	0.714286	0.706897	0.709677	9.98485e-05	0
C15orf32	2.87103	2.90169	2.74834	2.78721	-0.0928397	-0.131711	-0.114481	-0.153352	8.89097e-05	0.00499924	0.721755	0.000166391	0.0033464	0.751634	0.013724	0.447072	0.681917	0.00104784	0.0275987	0.706349	0.00123127	0.0165049	0.736111	0.0385967	0.667565	0.666667	0.00217174	0.113951	0.75873	0.00243353	0.063253	0.788889	0.0291454	0.447837	0.718519	<	2.77748	25	41	17	10	0.595238	0.803922	0.714286	0.706897	0.709677	9.98485e-05	0
TBCA	10.9699	10.9751	11.2411	11.178	0.206581	0.269715	0.202866	0.266	0.000158007	0.0068705	0.711951	0.000434073	0.00649518	0.723856	0.00819389	0.425138	0.696078	0.000571998	0.0196137	0.716931	0.00112522	0.0156102	0.726852	0.0119065	0.583792	0.703704	0.0144371	0.208313	0.7	0.0169174	0.147746	0.716667	0.0544668	0.49286	0.677778	>	11.1156	25	41	17	10	0.595238	0.803922	0.714286	0.706897	0.709677	9.98485e-05	0
ORC4L	7.6887	7.64089	8.18156	7.75273	0.0780871	0.506925	0.111841	0.540678	0.000634148	0.0152922	0.708683	1.04617e-05	0.000506393	0.800654	0.459622	0.852574	0.586057	0.00295454	0.0507425	0.701058	7.1872e-05	0.00242388	0.792824	0.556223	0.927804	0.578704	0.0134308	0.201783	0.726984	0.00113698	0.049113	0.819444	0.395588	0.774832	0.603704	>	7.91522	25	41	17	10	0.595238	0.803922	0.714286	0.706897	0.709677	9.98485e-05	0
NINL	5.92875	6.15103	6.58141	6.1933	0.199177	0.587287	0.0422755	0.430385	0.0030513	0.0391676	0.693744	0.000669287	0.0086992	0.754085	0.204633	0.711674	0.61329	0.00257012	0.0464971	0.725529	0.000775201	0.012126	0.78125	0.118725	0.743887	0.651235	0.219547	0.568519	0.61746	0.0825133	0.311172	0.688889	0.824872	0.952739	0.522222	>	6.22721	25	41	17	10	0.595238	0.803922	0.714286	0.706897	0.709677	9.98485e-05	0
FAM3D	6.06562	5.63673	5.49083	5.42546	-0.514013	-0.448644	-0.211269	-0.1459	0.0126094	0.0887898	0.676004	0.0625894	0.186836	0.688725	0.0367868	0.505664	0.659041	0.00420714	0.062497	0.706349	0.0288682	0.126825	0.710648	0.0143349	0.593454	0.700617	0.481999	0.767014	0.603175	0.626248	0.822352	0.636111	0.39649	0.774832	0.559259	<	5.24121	25	41	17	10	0.595238	0.803922	0.714286	0.706897	0.709677	9.98485e-05	0
TTF1	7.37549	7.36027	7.65618	7.57182	0.200812	0.285164	0.211556	0.295908	0.00320731	0.0400271	0.675537	0.00306156	0.0245977	0.707516	0.0491227	0.534865	0.632898	0.00855379	0.0924424	0.673942	0.0064452	0.0487684	0.709491	0.0668962	0.703845	0.626543	0.0574734	0.337728	0.679365	0.0460862	0.235388	0.702778	0.165733	0.618607	0.648148	>	7.60271	25	41	17	10	0.595238	0.803922	0.714286	0.706897	0.709677	9.98485e-05	0
CEP135	4.45234	4.56628	4.74368	4.75741	0.271559	0.257824	0.191133	0.177398	0.00215716	0.0319672	0.658263	0.00796734	0.0469285	0.670752	0.00614549	0.410689	0.641612	0.00230389	0.0438639	0.683201	0.00710307	0.0521474	0.701389	0.0047749	0.581574	0.658951	0.18952	0.537329	0.598413	0.241048	0.520693	0.597222	0.18989	0.638306	0.6	>	4.65085	25	41	17	10	0.595238	0.803922	0.714286	0.706897	0.709677	9.98485e-05	0
POGZ	6.68132	6.67412	6.92412	6.84071	0.161504	0.244911	0.166591	0.249998	0.0131593	0.0909639	0.655929	0.013306	0.0661693	0.675654	0.123709	0.630606	0.62963	0.0318759	0.185884	0.653439	0.0301722	0.130448	0.678241	0.176248	0.784322	0.62037	0.0816805	0.386937	0.661905	0.0593536	0.265921	0.669444	0.200472	0.64608	0.651852	>	6.86421	25	41	17	10	0.595238	0.803922	0.714286	0.706897	0.709677	9.98485e-05	0
CXorf27	3.92991	3.89448	3.88406	3.88554	-0.0339492	-0.0354215	-0.00894431	-0.0104166	0.701235	0.844755	0.634921	0.762798	0.872074	0.712418	0.608618	0.902746	0.53159	0.666504	0.849714	0.642196	0.735366	0.865667	0.721065	0.517668	0.921849	0.537037	0.950287	0.98223	0.61746	0.959027	0.984899	0.691667	0.915285	0.977115	0.518519	<	3.77753	25	41	17	10	0.595238	0.803922	0.714286	0.706897	0.709677	9.98485e-05	0
BAX	6.65167	6.60465	7.08301	7.08006	0.442215	0.445168	0.47541	0.478363	4.30558e-05	0.00328324	0.734827	0.000711242	0.00906788	0.732843	0.00307332	0.387853	0.737473	0.000153476	0.00977115	0.737434	0.00135002	0.0174601	0.732639	0.00492213	0.581574	0.743827	0.00134152	0.10004	0.728571	0.00471447	0.0825559	0.733333	0.012573	0.398511	0.722222	>	6.96369	26	40	16	11	0.619048	0.784314	0.702703	0.714286	0.709677	0.000109203	0
ZNF644	6.63541	6.7416	7.31145	6.7155	0.0488637	0.644812	-0.0260984	0.56985	0.00022353	0.00849543	0.728758	4.20596e-07	5.69212e-05	0.873366	0.575505	0.893898	0.535948	0.000552869	0.0192887	0.744709	3.60653e-06	0.00032331	0.883102	0.389626	0.885384	0.560185	0.0702819	0.36305	0.690476	0.00448451	0.0813788	0.85	0.812499	0.948643	0.522222	>	6.89353	26	40	16	11	0.619048	0.784314	0.702703	0.714286	0.709677	0.000109203	0
B3GAT2	3.28216	3.23728	3.50468	3.39443	0.125474	0.235726	0.157154	0.267406	0.000501416	0.0133651	0.727358	0.00031974	0.00526518	0.742647	0.0372734	0.505992	0.706972	0.00495035	0.0681559	0.70172	0.00302976	0.0294305	0.717593	0.099308	0.734793	0.680556	0.00784152	0.170088	0.788889	0.00528336	0.0860795	0.802778	0.034191	0.462626	0.77037	>	3.34148	26	40	16	11	0.619048	0.784314	0.702703	0.714286	0.709677	0.000109203	0
ST3GAL1	7.00212	6.89393	6.07894	6.84715	-0.123145	-0.89136	-0.0467798	-0.814995	0.000414738	0.0121299	0.70775	1.2012e-06	0.000120019	0.839869	0.512501	0.87279	0.53159	0.000993634	0.0269522	0.708995	6.14883e-06	0.000467381	0.836806	0.452876	0.903856	0.53858	0.037452	0.287119	0.704762	0.000601079	0.0390629	0.847222	0.840721	0.958336	0.514815	<	6.56082	26	40	16	11	0.619048	0.784314	0.702703	0.714286	0.709677	0.000109203	0
SMARCA2	5.81153	5.6154	6.03154	5.87565	0.121811	0.277698	0.260254	0.416142	0.0138067	0.0937693	0.668534	0.00606904	0.0391628	0.705065	0.251304	0.744655	0.619826	0.106859	0.354018	0.623677	0.0457551	0.170429	0.664352	0.57534	0.932237	0.569444	0.00616421	0.158059	0.77619	0.00298788	0.0685665	0.802778	0.0531137	0.492587	0.740741	>	5.90755	26	40	16	11	0.619048	0.784314	0.702703	0.714286	0.709677	0.000109203	0
VPS45	6.01539	5.95558	6.16497	6.01479	0.0169886	0.167163	0.0592074	0.209381	0.033307	0.156559	0.663866	0.00422686	0.030727	0.72549	0.777149	0.949055	0.581699	0.114112	0.366282	0.652778	0.0199213	0.100593	0.712963	0.992627	0.99899	0.572531	0.0375802	0.287621	0.690476	0.00776395	0.101643	0.755556	0.407617	0.780002	0.603704	>	6.09859	26	40	16	11	0.619048	0.784314	0.702703	0.714286	0.709677	0.000109203	0
ANKRD60	3.9757	3.97613	3.88551	3.8681	-0.107725	-0.0903148	-0.108028	-0.0906176	0.0139149	0.0940093	0.662465	0.0571396	0.175681	0.645425	0.028116	0.489099	0.685185	0.0268721	0.169599	0.666005	0.0822763	0.247485	0.648148	0.039771	0.668537	0.689815	0.110145	0.434122	0.653968	0.197386	0.472737	0.638889	0.107409	0.557427	0.674074	<	3.86734	26	40	16	11	0.619048	0.784314	0.702703	0.714286	0.709677	0.000109203	0
C18orf21	7.89367	7.92083	8.42939	8.1104	0.208743	0.527734	0.189572	0.508563	3.47666e-05	0.00299151	0.727824	2.26366e-06	0.000184518	0.811275	0.0723668	0.569823	0.616558	0.000197092	0.0109751	0.721561	1.84812e-05	0.000965379	0.804398	0.0939454	0.729833	0.611111	0.00502096	0.145528	0.742857	0.000301925	0.031601	0.827778	0.169705	0.622761	0.62963	>	7.76476	39	22	3	29	0.928571	0.431373	0.573529	0.88	0.655914	0.000110533	0
FAF1	6.08959	6.16529	6.54918	6.21841	0.106551	0.437323	0.0531158	0.383888	0.000531622	0.0138201	0.719888	2.83942e-05	0.00100822	0.780229	0.272895	0.756163	0.639434	0.000823664	0.0246126	0.743386	6.33303e-05	0.00226078	0.798611	0.207851	0.808344	0.669753	0.054852	0.3312	0.663492	0.00831149	0.105295	0.736111	0.648995	0.890187	0.566667	>	5.96659	39	22	3	29	0.928571	0.431373	0.573529	0.88	0.655914	0.000110533	0
CXCL1	8.51871	8.70251	6.83196	7.80496	-0.767811	-1.74081	-0.897549	-1.87055	9.7878e-05	0.00528383	0.719421	1.74304e-05	0.000727454	0.780229	0.0784681	0.583312	0.638344	0.000301163	0.0135431	0.718254	2.88048e-05	0.00130872	0.783565	0.0938496	0.729833	0.631173	0.00461053	0.143789	0.722222	0.00117028	0.0496709	0.772222	0.142074	0.594797	0.655556	<	9.12936	39	22	3	29	0.928571	0.431373	0.573529	0.88	0.655914	0.000110533	0
TUBA4A	9.91592	9.65307	9.02811	9.62341	-0.2152	-0.8105	-0.0296635	-0.624963	0.000269504	0.00949297	0.696545	1.35157e-05	0.000612638	0.77451	0.227888	0.724976	0.592593	0.000248499	0.0123269	0.724868	2.15243e-05	0.00106772	0.792824	0.132021	0.757629	0.634259	0.0797127	0.382261	0.628571	0.00813524	0.104452	0.730556	0.876806	0.968518	0.507407	<	10.074	39	22	3	29	0.928571	0.431373	0.573529	0.88	0.655914	0.000110533	0
CYP3A5	4.18104	3.6547	3.44432	3.52158	-0.504658	-0.581916	-0.133123	-0.210381	0.000143888	0.00647852	0.694211	0.00158919	0.0157979	0.714869	0.0159459	0.447072	0.666667	2.64891e-06	0.00149789	0.759259	9.31165e-05	0.00287267	0.774306	0.00189527	0.581574	0.739198	0.242179	0.589901	0.538095	0.251085	0.530052	0.572222	0.521809	0.83769	0.507407	<	3.94734	39	22	3	29	0.928571	0.431373	0.573529	0.88	0.655914	0.000110533	0
GNAI2	8.555	8.72219	8.29486	8.39392	-0.210255	-0.309309	-0.328267	-0.427321	0.00175527	0.0281844	0.664799	0.00374408	0.0282019	0.687092	0.0574293	0.54935	0.635076	0.0208375	0.148225	0.613095	0.0262633	0.119298	0.640046	0.178515	0.78652	0.57716	0.000568464	0.0797171	0.788889	0.00120171	0.0499446	0.8	0.00471329	0.36884	0.774074	<	8.74345	39	22	3	29	0.928571	0.431373	0.573529	0.88	0.655914	0.000110533	0
ISLR	6.89104	7.37679	6.67859	6.71629	-0.317614	-0.355318	-0.660496	-0.6982	0.150408	0.372036	0.641923	0.225007	0.422239	0.635621	0.324778	0.782097	0.650327	0.45093	0.716862	0.61045	0.507069	0.716383	0.604167	0.617535	0.943183	0.618827	0.0188597	0.229509	0.71746	0.0337546	0.202081	0.711111	0.0449534	0.485421	0.725926	<	7.72158	39	22	3	29	0.928571	0.431373	0.573529	0.88	0.655914	0.000110533	0
RPL3	12.968	13.0652	13.1541	13.1448	0.148232	0.157496	0.079591	0.0888547	7.43028e-05	0.00454642	0.728291	0.000599362	0.00809458	0.724673	0.00322058	0.387853	0.733115	3.82952e-05	0.00438275	0.762566	0.000327601	0.00666638	0.760417	0.00169883	0.581574	0.765432	0.107961	0.4309	0.646032	0.121177	0.37559	0.638889	0.182288	0.631015	0.655556	>	13.1005	27	39	15	12	0.642857	0.764706	0.692308	0.722222	0.709677	0.000118711	0
URB2	6.64932	6.74388	6.97399	6.9641	0.286966	0.296858	0.220222	0.230114	0.000490119	0.0132226	0.721755	0.00239547	0.0207435	0.706699	0.00787335	0.425064	0.74183	0.000315052	0.0137739	0.738757	0.00113659	0.0157242	0.721065	0.0036701	0.581574	0.762346	0.0820252	0.387651	0.680952	0.110069	0.359717	0.672222	0.158261	0.613157	0.692593	>	6.86194	27	39	15	12	0.642857	0.764706	0.692308	0.722222	0.709677	0.000118711	0
HTRA1	9.15446	9.11937	8.54479	8.56681	-0.577337	-0.599353	-0.552567	-0.574584	0.000226775	0.00856987	0.712185	0.00121178	0.0131015	0.70098	0.00167061	0.378067	0.727124	0.000537233	0.0189338	0.716931	0.00177332	0.020841	0.704861	0.00140379	0.581574	0.733025	0.0342036	0.276492	0.700794	0.0572303	0.26097	0.691667	0.0541195	0.492587	0.712963	<	8.81307	27	39	15	12	0.642857	0.764706	0.692308	0.722222	0.709677	0.000118711	0
DCLRE1A	6.33243	6.28638	6.6756	6.60681	0.287922	0.356709	0.320428	0.389215	0.000313597	0.0102941	0.706349	0.000753262	0.00945289	0.723856	0.00989514	0.427184	0.683007	0.00172992	0.036983	0.701058	0.00269552	0.0273062	0.719907	0.0206137	0.620524	0.675926	0.0103493	0.182767	0.719048	0.0119829	0.125977	0.733333	0.039491	0.476442	0.7	>	6.51637	27	39	15	12	0.642857	0.764706	0.692308	0.722222	0.709677	0.000118711	0
RNF138	7.40429	7.2775	8.03987	7.44848	0.0814847	0.672868	0.170981	0.762364	0.000189098	0.00762147	0.705415	2.0592e-07	3.90887e-05	0.838235	0.519234	0.876162	0.528322	0.00191262	0.0390952	0.693122	3.65119e-06	0.000324404	0.833333	0.735709	0.96852	0.506173	0.00412427	0.139212	0.734921	5.79693e-05	0.0169333	0.85	0.32347	0.732715	0.581481	>	7.62977	27	39	15	12	0.642857	0.764706	0.692308	0.722222	0.709677	0.000118711	0
TDRKH	4.117	4.21891	4.52481	4.39538	0.248404	0.377833	0.176468	0.305896	0.00113496	0.0216078	0.696078	0.000963	0.0111487	0.726307	0.0448813	0.524691	0.655773	0.00110245	0.0284554	0.712302	0.000759379	0.0119439	0.747685	0.0306119	0.642359	0.665123	0.102199	0.421478	0.657143	0.0656403	0.277541	0.675	0.317142	0.729245	0.633333	>	4.39317	27	39	15	12	0.642857	0.764706	0.692308	0.722222	0.709677	0.000118711	0
SNHG10	3.47372	3.5081	3.66696	3.60803	0.124196	0.183131	0.0999301	0.158865	0.00259144	0.0355075	0.691877	0.00376957	0.0283405	0.70098	0.056534	0.548174	0.679739	0.00521342	0.0703103	0.702381	0.00732669	0.053068	0.707176	0.067455	0.703845	0.695988	0.0697409	0.362076	0.666667	0.0546799	0.255843	0.686111	0.185913	0.634479	0.640741	>	3.54262	27	39	15	12	0.642857	0.764706	0.692308	0.722222	0.709677	0.000118711	0
C1orf94	4.68149	4.79188	4.58857	4.63812	-0.0758339	-0.125392	-0.153755	-0.203313	0.014933	0.0980379	0.678338	0.010021	0.0552024	0.70098	0.188556	0.696647	0.648148	0.099031	0.341097	0.640873	0.044335	0.166975	0.666667	0.438601	0.899575	0.606481	0.0083205	0.170458	0.768254	0.00617153	0.0920942	0.783333	0.083073	0.526471	0.748148	<	4.61448	27	39	15	12	0.642857	0.764706	0.692308	0.722222	0.709677	0.000118711	0
HAUS7	6.69894	6.64974	7.10053	7.02022	0.335754	0.416059	0.370481	0.450786	2.51367e-05	0.00252517	0.737162	0.000147306	0.00308922	0.747549	0.00402794	0.399534	0.723312	0.000170971	0.0101723	0.728175	0.000552336	0.00948605	0.736111	0.00828239	0.581574	0.717593	0.00134697	0.10004	0.75873	0.00249152	0.0636323	0.775	0.0133899	0.399753	0.737037	>	6.43271	41	17	1	34	0.97619	0.333333	0.546667	0.944444	0.623656	0.00012	0
ACBD4	5.20085	5.1759	4.96959	5.01101	-0.182506	-0.223923	-0.164892	-0.206309	0.000169299	0.00711369	0.719421	0.000964433	0.0111509	0.720588	0.00693621	0.425064	0.717865	0.00022829	0.011672	0.730159	0.00103746	0.0147228	0.732639	0.00433435	0.581574	0.726852	0.0236917	0.24714	0.693651	0.0406571	0.220922	0.691667	0.0739993	0.519972	0.696296	<	5.33434	41	17	1	34	0.97619	0.333333	0.546667	0.944444	0.623656	0.00012	0
PSMC3	9.28399	9.20806	9.62221	9.56081	0.299155	0.360551	0.352751	0.414147	0.000229125	0.00862607	0.70775	0.000974153	0.0111986	0.720588	0.0107757	0.436983	0.690632	0.00152764	0.0346469	0.704365	0.00373053	0.0336661	0.719907	0.0247465	0.628517	0.683642	0.00290015	0.122488	0.715873	0.00509143	0.0855317	0.722222	0.018297	0.412925	0.707407	>	9.00074	41	17	1	34	0.97619	0.333333	0.546667	0.944444	0.623656	0.00012	0
ZHX3	5.58257	5.50804	5.29982	5.44026	-0.120391	-0.260834	-0.0677823	-0.208225	0.000404227	0.0120887	0.692344	0.000252406	0.00446884	0.749183	0.113339	0.617501	0.616558	0.000534965	0.018921	0.697751	0.000432844	0.00804928	0.747685	0.093719	0.729833	0.631173	0.0234132	0.246474	0.679365	0.00523077	0.0860165	0.752778	0.33696	0.741052	0.581481	<	5.67833	41	17	1	34	0.97619	0.333333	0.546667	0.944444	0.623656	0.00012	0
ADAM29	2.63768	2.69484	2.51491	2.61902	-0.0354714	-0.13958	-0.0758193	-0.179927	0.00136676	0.0242224	0.679272	0.000147277	0.00308922	0.761438	0.359094	0.804558	0.569717	0.01434	0.12147	0.645503	0.00159842	0.0194604	0.729167	0.645167	0.948042	0.533951	0.00132133	0.10004	0.760317	0.000278044	0.0300453	0.838889	0.112448	0.563006	0.655556	<	2.74887	41	17	1	34	0.97619	0.333333	0.546667	0.944444	0.623656	0.00012	0
CENPL	6.56286	6.41438	7.05584	6.76648	0.24729	0.536656	0.352095	0.641461	0.00205891	0.0309937	0.672736	0.00149336	0.0151312	0.715686	0.15421	0.662281	0.615468	0.00594079	0.0754253	0.67328	0.00296184	0.0289921	0.716435	0.207412	0.80763	0.615741	0.00841966	0.171308	0.671429	0.00774266	0.101564	0.713889	0.12345	0.574917	0.614815	>	6.1096	41	17	1	34	0.97619	0.333333	0.546667	0.944444	0.623656	0.00012	0
PRAM1	4.38252	4.4158	4.18067	4.25137	-0.140942	-0.211637	-0.164432	-0.235127	0.00632125	0.059418	0.665733	0.0107769	0.0580768	0.683007	0.0938259	0.595357	0.642702	0.0190638	0.141938	0.642857	0.0260325	0.118546	0.665509	0.143416	0.767741	0.612654	0.025932	0.255288	0.720635	0.0325125	0.19816	0.725	0.0865374	0.533612	0.714815	<	4.56973	41	17	1	34	0.97619	0.333333	0.546667	0.944444	0.623656	0.00012	0
DUOXA1	6.07254	5.62315	5.09346	5.83947	-0.100893	-0.846902	0.216324	-0.529686	0.000142664	0.00647852	0.727358	9.83726e-08	2.55398e-05	0.856209	0.550874	0.885148	0.555556	1.09535e-05	0.00268835	0.78373	3.06834e-09	4.08928e-06	0.902778	0.16699	0.783814	0.625	0.29366	0.633765	0.592063	0.00637093	0.0937169	0.744444	0.32949	0.73626	0.611111	<	5.22874	19	46	23	5	0.452381	0.901961	0.791667	0.666667	0.698925	0.000122317	0
HOPX	6.68452	6.58229	5.89584	6.5047	-0.149751	-0.758609	-0.0775904	-0.686448	0.00120208	0.022375	0.718487	2.53671e-05	0.000927083	0.805556	0.444722	0.846295	0.602397	0.00138748	0.0325552	0.716931	2.47765e-05	0.00118212	0.800926	0.36979	0.87674	0.604938	0.0586951	0.339864	0.722222	0.00396394	0.0765747	0.816667	0.765355	0.934507	0.596296	<	6.03638	19	46	23	5	0.452381	0.901961	0.791667	0.666667	0.698925	0.000122317	0
MXD1	7.38851	7.02291	6.52256	6.98794	-0.293042	-0.758428	-0.0349721	-0.500358	0.000303717	0.0100857	0.717554	1.52037e-05	0.000663617	0.798203	0.147284	0.65488	0.610022	0.000130891	0.00881023	0.748677	7.2387e-06	0.000516817	0.824074	0.0709429	0.703845	0.648148	0.158568	0.498259	0.642857	0.0131217	0.130571	0.736111	0.890358	0.971768	0.518519	<	6.52157	19	46	23	5	0.452381	0.901961	0.791667	0.666667	0.698925	0.000122317	0
CKMT2	3.75765	3.83774	3.60027	3.60821	-0.173003	-0.180934	-0.229536	-0.237467	0.000179175	0.007355	0.714286	0.00105051	0.0117981	0.719771	0.00422798	0.402484	0.706972	0.00266013	0.0474809	0.696429	0.0069551	0.051477	0.699074	0.0179081	0.618488	0.692901	0.00141992	0.100658	0.757143	0.00340173	0.0721226	0.769444	0.00769076	0.383101	0.740741	<	3.56724	19	46	23	5	0.452381	0.901961	0.791667	0.666667	0.698925	0.000122317	0
TMEM30B	6.6198	6.53874	6.23142	6.25976	-0.336195	-0.364532	-0.278974	-0.307311	0.000155548	0.00680467	0.70915	0.000448221	0.0066324	0.74183	0.00285536	0.387853	0.665577	0.000515378	0.018464	0.719577	0.00119495	0.0162727	0.74537	0.00548886	0.581574	0.685185	0.0379969	0.288717	0.684127	0.0350083	0.205751	0.733333	0.0677236	0.509465	0.618519	<	6.18757	19	46	23	5	0.452381	0.901961	0.791667	0.666667	0.698925	0.000122317	0
GRN	9.9879	9.91527	9.48624	9.79602	-0.170517	-0.480302	-0.119251	-0.429036	0.0002299	0.00863317	0.705882	4.94504e-06	0.000309895	0.787582	0.129737	0.638276	0.59695	0.000776908	0.0238526	0.71627	3.482e-05	0.00149055	0.795139	0.138545	0.763872	0.611111	0.0368008	0.2851	0.680952	0.00217257	0.0609809	0.769444	0.422741	0.78746	0.562963	<	9.55453	19	46	23	5	0.452381	0.901961	0.791667	0.666667	0.698925	0.000122317	0
ANXA9	4.31148	4.23135	3.84174	4.12425	-0.163654	-0.446169	-0.107093	-0.389608	0.017371	0.106522	0.68394	0.00609726	0.0392688	0.741013	0.41161	0.830149	0.607843	0.0192624	0.142885	0.684524	0.00671547	0.0501116	0.741898	0.385025	0.883092	0.608025	0.0994142	0.417878	0.68254	0.0137245	0.13339	0.738889	0.636506	0.885633	0.607407	<	3.75709	19	46	23	5	0.452381	0.901961	0.791667	0.666667	0.698925	0.000122317	0
PRSS2	5.96914	6.61291	5.04431	5.74891	-0.409572	-1.11418	-0.863997	-1.56861	0.00854849	0.0706461	0.680205	0.00157346	0.0156791	0.744281	0.32846	0.784216	0.594771	0.0482631	0.233671	0.661376	0.00602638	0.046677	0.730324	0.593344	0.934718	0.569444	0.00756547	0.16931	0.725397	0.00162874	0.0559452	0.777778	0.154458	0.607349	0.655556	<	4.56072	19	46	23	5	0.452381	0.901961	0.791667	0.666667	0.698925	0.000122317	0
DYX1C1	3.97013	3.99006	4.55938	4.04894	0.0729431	0.583382	0.0588817	0.56932	0.00102537	0.0203355	0.679739	5.03567e-06	0.000314588	0.776961	0.552477	0.885889	0.550109	0.00378715	0.0582125	0.688492	5.10385e-05	0.00196214	0.780093	0.568524	0.930029	0.566358	0.0400458	0.295081	0.65873	0.00149425	0.0552155	0.769444	0.70589	0.913963	0.511111	>	4.45884	19	46	23	5	0.452381	0.901961	0.791667	0.666667	0.698925	0.000122317	0
CES3	6.07587	6.13805	5.91894	6.00964	-0.0845136	-0.175222	-0.128407	-0.219115	0.00334041	0.041069	0.672269	0.00130129	0.0137713	0.723856	0.147847	0.65488	0.603486	0.0194509	0.143417	0.658069	0.00653295	0.0492514	0.710648	0.278477	0.835421	0.587963	0.0123562	0.195576	0.706349	0.00597494	0.0907666	0.755556	0.117902	0.569565	0.640741	<	5.92922	19	46	23	5	0.452381	0.901961	0.791667	0.666667	0.698925	0.000122317	0
ZNF238	6.09054	6.11998	6.63513	6.33111	0.231909	0.535933	0.211131	0.515155	0.0017445	0.0281228	0.663866	0.000437102	0.00653072	0.712418	0.119214	0.624319	0.599129	0.00464908	0.0659018	0.662698	0.0013332	0.0173488	0.712963	0.137258	0.763512	0.595679	0.0560103	0.334712	0.666667	0.0212409	0.162546	0.711111	0.290689	0.715657	0.607407	>	6.66499	19	46	23	5	0.452381	0.901961	0.791667	0.666667	0.698925	0.000122317	0
KIAA1958	5.28862	5.39605	5.64612	5.56117	0.240957	0.325906	0.165128	0.250078	0.00460727	0.049625	0.653595	0.00786292	0.0465603	0.653595	0.042978	0.520557	0.653595	0.0050078	0.0686934	0.667328	0.0083093	0.0575177	0.666667	0.0319384	0.650748	0.66821	0.173781	0.516988	0.620635	0.165982	0.435396	0.622222	0.29104	0.715657	0.618519	>	5.70218	19	46	23	5	0.452381	0.901961	0.791667	0.666667	0.698925	0.000122317	0
LOC439938	3.17259	3.25247	3.35387	3.38015	0.184066	0.157789	0.127677	0.101401	0.0108074	0.0810405	0.652661	0.0392455	0.136778	0.624183	0.0183235	0.460361	0.690632	0.0138811	0.119685	0.680556	0.0442218	0.166705	0.653935	0.0233423	0.626356	0.716049	0.257657	0.60585	0.585714	0.341608	0.612351	0.552778	0.183752	0.632906	0.62963	>	3.39063	19	46	23	5	0.452381	0.901961	0.791667	0.666667	0.698925	0.000122317	0
TMED3	9.04746	9.0395	8.76095	8.93012	-0.114998	-0.284175	-0.109376	-0.278553	0.0115551	0.0841526	0.645191	0.00493031	0.0341281	0.694444	0.256925	0.746469	0.579521	0.0218592	0.151833	0.646164	0.00981531	0.0640189	0.6875	0.279663	0.83556	0.591049	0.0988161	0.416764	0.642857	0.0498588	0.243823	0.711111	0.393547	0.773437	0.551852	<	8.60294	19	46	23	5	0.452381	0.901961	0.791667	0.666667	0.698925	0.000122317	0
SLAIN1	4.55803	4.68743	5.33515	5.09584	0.499752	0.739061	0.408405	0.647714	0.0037621	0.0437973	0.637722	0.00240999	0.0208293	0.669118	0.0633811	0.557728	0.595861	0.00837177	0.0915536	0.646825	0.00572922	0.0451628	0.675926	0.0832001	0.715965	0.608025	0.101945	0.421459	0.615873	0.0512143	0.247957	0.652778	0.257404	0.691542	0.566667	>	5.36168	19	46	23	5	0.452381	0.901961	0.791667	0.666667	0.698925	0.000122317	0
HEATR1	5.91246	5.92243	6.15396	6.15779	0.242405	0.238572	0.235367	0.231534	3.7823e-05	0.0031505	0.738562	0.000596014	0.00807209	0.742647	0.001682	0.378067	0.733115	0.000107054	0.00786805	0.736111	0.000972066	0.0140918	0.733796	0.00230578	0.581574	0.739198	0.00549627	0.149956	0.744444	0.0142987	0.136402	0.763889	0.0210552	0.421045	0.718519	>	5.93841	34	30	8	21	0.809524	0.588235	0.618182	0.789474	0.688172	0.000122508	0
ZBTB47	5.79294	5.76562	5.58463	5.6449	-0.140006	-0.20027	-0.120725	-0.180988	8.6575e-05	0.00490289	0.731559	0.000182043	0.00355045	0.753268	0.0120996	0.443067	0.702614	0.000377112	0.0153854	0.728175	0.000710555	0.0113911	0.747685	0.0202878	0.620524	0.70216	0.0109538	0.18634	0.739683	0.00767774	0.100911	0.766667	0.0585556	0.499213	0.703704	<	5.74864	34	30	8	21	0.809524	0.588235	0.618182	0.789474	0.688172	0.000122508	0
ZNF2	5.54931	5.55807	5.98519	5.76851	0.216625	0.433299	0.210447	0.427121	5.2281e-05	0.00363099	0.728758	5.26934e-05	0.00152666	0.75817	0.0133196	0.447072	0.689542	0.000287759	0.0132828	0.734127	0.000282082	0.00605016	0.759259	0.0178362	0.618488	0.700617	0.00873205	0.172919	0.715873	0.00743183	0.0996443	0.755556	0.0330365	0.460903	0.662963	>	5.64398	34	30	8	21	0.809524	0.588235	0.618182	0.789474	0.688172	0.000122508	0
C13orf27	6.77183	6.74131	7.27028	7.16079	0.397942	0.50743	0.419482	0.52897	0.00169835	0.027648	0.715686	0.00497421	0.0343507	0.729575	0.0233604	0.473673	0.697168	0.00721137	0.0838154	0.708333	0.015576	0.0866391	0.722222	0.0484104	0.677709	0.689815	0.0192884	0.231209	0.733333	0.0282278	0.185042	0.747222	0.0264446	0.439017	0.714815	>	6.73804	34	30	8	21	0.809524	0.588235	0.618182	0.789474	0.688172	0.000122508	0
EHD3	5.68227	5.5759	5.34858	5.45156	-0.19942	-0.302405	-0.124336	-0.227321	0.000238162	0.00881684	0.714753	0.000545263	0.0076045	0.729575	0.0277637	0.487435	0.694989	9.09625e-05	0.00714294	0.748677	0.000225197	0.00520217	0.766204	0.0103421	0.581574	0.725309	0.065726	0.353967	0.633333	0.0562792	0.258483	0.641667	0.278647	0.707312	0.622222	<	5.58917	34	30	8	21	0.809524	0.588235	0.618182	0.789474	0.688172	0.000122508	0
ROCK2	7.06132	7.09967	7.27349	7.30056	0.227953	0.200884	0.200882	0.173813	0.00120195	0.022375	0.704015	0.0120278	0.0621471	0.68219	0.00672581	0.425064	0.733115	0.00228594	0.0436052	0.712302	0.0166033	0.0898283	0.689815	0.00902033	0.581574	0.742284	0.0406828	0.296188	0.684127	0.0957641	0.334664	0.663889	0.0396289	0.476518	0.711111	>	7.0896	34	30	8	21	0.809524	0.588235	0.618182	0.789474	0.688172	0.000122508	0
FAM169A	5.12793	5.11163	5.70125	5.57397	0.45083	0.578115	0.462334	0.58962	0.000938814	0.0193054	0.699346	0.00199637	0.0183745	0.724673	0.0347606	0.50085	0.665577	0.00252369	0.0459504	0.707672	0.0038287	0.0341847	0.738426	0.048763	0.677709	0.666667	0.0153322	0.212851	0.679365	0.013015	0.130417	0.691667	0.0890018	0.535486	0.662963	>	5.12175	34	30	8	21	0.809524	0.588235	0.618182	0.789474	0.688172	0.000122508	0
NFU1	8.60516	8.58168	8.86783	8.70886	0.11061	0.269579	0.127182	0.286151	0.0264028	0.13667	0.679272	0.0188167	0.0840592	0.708333	0.311711	0.774899	0.640523	0.0478521	0.2323	0.667989	0.0329659	0.137928	0.700231	0.351656	0.870629	0.625	0.0997947	0.418238	0.706349	0.0788118	0.305039	0.727778	0.327833	0.735408	0.677778	>	8.5601	34	30	8	21	0.809524	0.588235	0.618182	0.789474	0.688172	0.000122508	0
RLF	7.45131	7.60027	8.29138	7.78532	0.290199	0.796261	0.18505	0.691112	6.89814e-05	0.00439174	0.728291	1.22627e-05	0.000568779	0.780229	0.0323038	0.495355	0.659041	0.000185015	0.0105075	0.749339	5.16644e-05	0.00198239	0.796296	0.0215013	0.620524	0.686728	0.0391098	0.292127	0.677778	0.0135994	0.132747	0.741667	0.244163	0.681779	0.592593	>	7.96721	23	43	19	8	0.547619	0.843137	0.741935	0.693548	0.709677	0.000127392	0
SNRPA	8.92639	8.94847	9.32975	9.10361	0.170727	0.396871	0.155137	0.381281	9.92215e-05	0.00528892	0.717087	1.71875e-05	0.000723357	0.770425	0.0543872	0.546085	0.645969	0.000349228	0.0147599	0.725529	6.61424e-05	0.00232543	0.775463	0.0594568	0.695432	0.658951	0.0160632	0.217386	0.696825	0.00452673	0.0816108	0.758333	0.188615	0.637021	0.614815	>	9.25817	23	43	19	8	0.547619	0.843137	0.741935	0.693548	0.709677	0.000127392	0
C11orf21	3.72255	3.75402	3.60813	3.65817	-0.073638	-0.123673	-0.0958563	-0.145891	0.00372183	0.0435616	0.689076	0.00306042	0.0245977	0.710784	0.0962576	0.599279	0.660131	0.0163595	0.130556	0.681878	0.0109853	0.0689937	0.702546	0.170373	0.784101	0.654321	0.0228483	0.244518	0.706349	0.0179443	0.151361	0.730556	0.124025	0.575833	0.674074	<	3.60804	23	43	19	8	0.547619	0.843137	0.741935	0.693548	0.709677	0.000127392	0
FAM110C	8.49539	8.89826	6.6967	8.27705	-0.336834	-1.91717	-0.621219	-2.20156	0.000413377	0.0121299	0.687675	1.61845e-06	0.000145741	0.811275	0.391984	0.820347	0.522876	0.0056721	0.0733922	0.669312	7.82823e-05	0.00256548	0.789352	0.627811	0.944321	0.509259	0.00450223	0.141962	0.731746	6.84944e-05	0.0180167	0.863889	0.205008	0.647945	0.555556	<	7.52592	23	43	19	8	0.547619	0.843137	0.741935	0.693548	0.709677	0.000127392	0
PCDHGA3	4.20626	4.16707	4.08529	4.07228	-0.122453	-0.109442	-0.0947945	-0.0817839	0.00841037	0.0700841	0.687675	0.0391268	0.136459	0.691993	0.0121116	0.443067	0.681917	0.0113455	0.10739	0.698413	0.045066	0.168774	0.700231	0.0129901	0.584174	0.695988	0.200198	0.548417	0.661905	0.310501	0.586029	0.672222	0.13217	0.58453	0.648148	<	4.04689	23	43	19	8	0.547619	0.843137	0.741935	0.693548	0.709677	0.000127392	0
GPBP1	8.36474	8.46074	8.72882	8.49273	0.0997539	0.335843	0.0319913	0.268081	0.000702344	0.0161944	0.679739	5.14285e-05	0.0014987	0.752451	0.209985	0.716595	0.582789	0.000823295	0.0246126	0.699074	9.17822e-05	0.00284027	0.768519	0.140129	0.764972	0.606481	0.104604	0.426357	0.633333	0.0192266	0.156111	0.713889	0.744167	0.927642	0.525926	>	8.57678	23	43	19	8	0.547619	0.843137	0.741935	0.693548	0.709677	0.000127392	0
SLC38A5	6.34194	6.91556	5.64587	5.66382	-0.846834	-0.864781	-1.25174	-1.26968	2.7511e-05	0.00263144	0.742764	0.000511001	0.00725012	0.737745	0.00125681	0.378067	0.749455	0.00159328	0.0355087	0.700397	0.00792943	0.0559736	0.696759	0.0121724	0.584174	0.705247	1.4419e-05	0.037114	0.844444	0.0001562	0.025387	0.836111	0.00010785	0.309461	0.855556	<	5.90996	28	38	14	13	0.666667	0.745098	0.682927	0.730769	0.709677	0.000128645	0
SMARCC1	7.49921	7.34875	8.02774	7.62231	0.167355	0.572781	0.27356	0.678985	3.50636e-05	0.00299151	0.73296	1.41915e-06	0.000131955	0.835784	0.131435	0.638748	0.595861	0.000167946	0.0101443	0.728836	2.10459e-06	0.000227421	0.832176	0.173749	0.784101	0.591049	0.00152082	0.104706	0.742857	0.000400643	0.0360922	0.844444	0.109556	0.559726	0.607407	>	7.66956	28	38	14	13	0.666667	0.745098	0.682927	0.730769	0.709677	0.000128645	0
HMGXB4	8.32525	8.18143	8.59327	8.53706	0.254111	0.31032	0.355633	0.411841	0.000263863	0.00931957	0.729225	0.0011139	0.0123506	0.727124	0.00864528	0.427184	0.732026	0.00354605	0.0556429	0.699074	0.00716715	0.0525214	0.693287	0.0301979	0.64222	0.70679	0.00120742	0.097276	0.801587	0.00326477	0.0709754	0.808333	0.00662076	0.37474	0.792593	>	8.46415	28	38	14	13	0.666667	0.745098	0.682927	0.730769	0.709677	0.000128645	0
RPS11	10.53	10.6051	10.8285	10.6446	0.0925617	0.276439	0.0395482	0.223426	0.000120908	0.00601262	0.72409	2.11456e-05	0.00082082	0.796569	0.128902	0.638122	0.627451	0.000207021	0.0112461	0.734788	6.36145e-05	0.00226284	0.800926	0.0949954	0.731752	0.646605	0.0294186	0.26491	0.698413	0.00461404	0.0818485	0.786111	0.463724	0.808926	0.581481	>	10.687	28	38	14	13	0.666667	0.745098	0.682927	0.730769	0.709677	0.000128645	0
LOC441461	6.20436	6.2514	6.02855	6.09074	-0.127451	-0.189645	-0.160655	-0.222849	0.000252171	0.0091242	0.719421	0.000315314	0.00522241	0.780229	0.0382358	0.509742	0.638344	0.00150033	0.034256	0.704365	0.00108542	0.0151738	0.765046	0.0738292	0.708446	0.623457	0.00212118	0.113078	0.755556	0.00135007	0.0524064	0.816667	0.0537521	0.492587	0.674074	<	6.08582	28	38	14	13	0.666667	0.745098	0.682927	0.730769	0.709677	0.000128645	0
C2orf54	5.04252	4.856	4.72402	4.73867	-0.248994	-0.263636	-0.117336	-0.131977	0.00824808	0.0693589	0.715686	0.0276413	0.108766	0.712418	0.0661608	0.56434	0.720044	0.00439577	0.0642055	0.729497	0.0169275	0.091111	0.724537	0.0433922	0.670427	0.736111	0.264862	0.610629	0.68254	0.281198	0.558014	0.683333	0.380335	0.765188	0.681481	<	4.7175	28	38	14	13	0.666667	0.745098	0.682927	0.730769	0.709677	0.000128645	0
LOC284475	3.19014	3.22262	3.06835	3.04678	-0.152918	-0.131347	-0.175846	-0.154275	0.000592959	0.0147253	0.702614	0.00776622	0.0462067	0.686275	0.00528714	0.410689	0.724401	0.00494375	0.0681559	0.675265	0.0295149	0.128523	0.665509	0.0205816	0.620524	0.688272	0.00239725	0.115019	0.768254	0.00931363	0.111224	0.736111	0.00451527	0.36884	0.811111	<	3.11175	28	38	14	13	0.666667	0.745098	0.682927	0.730769	0.709677	0.000128645	0
HAT1	9.44946	9.44367	9.80021	9.57907	0.131311	0.352453	0.135403	0.356546	0.00225356	0.032622	0.690943	0.000252895	0.00446884	0.75817	0.230995	0.727366	0.601307	0.00667022	0.0800417	0.687831	0.00086345	0.0129908	0.752315	0.280944	0.836117	0.601852	0.0324183	0.272897	0.698413	0.00393519	0.0764177	0.772222	0.345014	0.745795	0.6	>	9.58938	28	38	14	13	0.666667	0.745098	0.682927	0.730769	0.709677	0.000128645	0
PMPCB	6.43989	6.34025	6.54673	6.5533	0.142715	0.136147	0.213048	0.206481	0.00776054	0.0670474	0.678805	0.0252634	0.10209	0.666667	0.0435247	0.520591	0.694989	0.0571076	0.254954	0.650794	0.105192	0.288296	0.638889	0.1397	0.764923	0.666667	0.00448361	0.141609	0.746032	0.00738776	0.0994531	0.733333	0.0179761	0.411349	0.762963	>	6.50961	28	38	14	13	0.666667	0.745098	0.682927	0.730769	0.709677	0.000128645	0
WNT9A	4.47013	4.41512	4.18756	4.35778	-0.0961683	-0.266391	-0.0573348	-0.227558	0.0191762	0.112981	0.660598	0.00367229	0.0278501	0.714052	0.378041	0.815007	0.589325	0.0209523	0.148438	0.677249	0.00360573	0.0330337	0.736111	0.334874	0.865517	0.598765	0.218436	0.567576	0.620635	0.0676982	0.28189	0.661111	0.711693	0.916227	0.566667	<	4.21857	28	38	14	13	0.666667	0.745098	0.682927	0.730769	0.709677	0.000128645	0
KIAA0513	4.77678	4.71585	4.41881	4.52772	-0.231137	-0.340046	-0.188126	-0.297035	9.25958e-05	0.00511349	0.725023	0.000316589	0.00523918	0.74183	0.0129646	0.447072	0.702614	0.000277848	0.0131311	0.722884	0.000861369	0.0129764	0.741898	0.0168228	0.612929	0.697531	0.00976387	0.180974	0.730159	0.0106611	0.120004	0.741667	0.0367208	0.468376	0.714815	<	4.79151	37	25	5	26	0.880952	0.490196	0.587302	0.833333	0.666667	0.000136493	0
SLC25A20	6.71002	6.70605	6.35283	6.58712	-0.121734	-0.356027	-0.118927	-0.353221	0.00791078	0.0677238	0.675537	0.00188714	0.017695	0.747549	0.334721	0.788337	0.579521	0.0204145	0.146455	0.670635	0.00630147	0.0480628	0.734954	0.393224	0.886235	0.584877	0.0429062	0.301702	0.687302	0.00614605	0.0920519	0.777778	0.378916	0.765049	0.566667	<	6.79087	37	25	5	26	0.880952	0.490196	0.587302	0.833333	0.666667	0.000136493	0
DOK3	5.32619	5.5349	5.08069	5.1443	-0.243276	-0.306881	-0.390602	-0.454207	0.01092	0.0816085	0.648926	0.0236392	0.0977397	0.662582	0.107069	0.611101	0.630719	0.0690009	0.282548	0.601852	0.0937832	0.268539	0.616898	0.262651	0.82815	0.58179	0.00199331	0.112526	0.761905	0.00356355	0.0736351	0.772222	0.0166835	0.409665	0.748148	<	5.56589	37	25	5	26	0.880952	0.490196	0.587302	0.833333	0.666667	0.000136493	0
NOSTRIN	3.93632	4.36212	3.72141	3.84279	-0.218762	-0.340148	-0.519331	-0.640716	0.0137497	0.0936377	0.644258	0.0212117	0.0910126	0.664216	0.177673	0.686216	0.617647	0.139795	0.406842	0.603175	0.112728	0.300434	0.618056	0.520072	0.921849	0.583333	0.000387825	0.0784806	0.742857	0.00153002	0.0555053	0.775	0.0140456	0.401502	0.7	<	4.05746	37	25	5	26	0.880952	0.490196	0.587302	0.833333	0.666667	0.000136493	0
LOC439990	3.96003	3.96828	3.72914	3.87361	-0.088847	-0.233316	-0.0946688	-0.239138	0.0174701	0.106992	0.634454	0.00627067	0.039999	0.679739	0.386402	0.819023	0.574074	0.0366023	0.201408	0.623677	0.0142203	0.0810835	0.668981	0.449288	0.903141	0.563272	0.0440001	0.304982	0.660317	0.00517414	0.0858631	0.705556	0.407825	0.780279	0.6	<	3.91274	37	25	5	26	0.880952	0.490196	0.587302	0.833333	0.666667	0.000136493	0
SSR2	10.7099	10.8744	10.9975	10.9245	0.166261	0.239266	0.0501165	0.123121	0.000140972	0.00643418	0.72549	0.000291158	0.00491185	0.760621	0.024303	0.480692	0.678649	2.6589e-05	0.00369456	0.775132	7.57835e-05	0.00252498	0.803241	0.00765863	0.581574	0.737654	0.17521	0.518399	0.606349	0.0892097	0.322975	0.658333	0.534155	0.841938	0.537037	>	10.7364	37	25	5	26	0.880952	0.490196	0.587302	0.833333	0.666667	0.000136493	0
TIMELESS	5.86268	5.83672	6.14673	6.10564	0.250596	0.29169	0.268918	0.310012	0.000517055	0.0135978	0.704482	0.00155101	0.0155131	0.713235	0.0133277	0.447072	0.69281	0.00221239	0.042898	0.688492	0.00434773	0.0374474	0.703704	0.025174	0.628517	0.66821	0.0126001	0.197081	0.742857	0.0149338	0.139389	0.736111	0.0473863	0.48799	0.751852	>	5.78522	37	25	5	26	0.880952	0.490196	0.587302	0.833333	0.666667	0.000136493	0
FARS2	5.77782	5.93394	6.06928	5.88247	0.0587324	0.245545	-0.0514737	0.135338	0.00296383	0.0385741	0.69888	0.000189639	0.00364877	0.779412	0.419753	0.834025	0.591503	0.000308602	0.0136187	0.743386	1.22201e-05	0.000740276	0.818287	0.144923	0.768108	0.643519	0.495848	0.774898	0.592063	0.118527	0.372032	0.686111	0.602972	0.870955	0.533333	>	5.75018	37	25	5	26	0.880952	0.490196	0.587302	0.833333	0.666667	0.000136493	0
PGRMC1	10.4397	10.4641	10.877	10.632	0.185151	0.430145	0.16791	0.412904	0.000681367	0.0159312	0.695612	0.000224869	0.00410536	0.745098	0.112933	0.616683	0.62963	0.0014873	0.0340579	0.695767	0.000484103	0.00869515	0.747685	0.113634	0.738768	0.626543	0.0285184	0.263083	0.695238	0.0108257	0.120668	0.738889	0.255977	0.690865	0.637037	>	10.3478	37	25	5	26	0.880952	0.490196	0.587302	0.833333	0.666667	0.000136493	0
KIF14	6.99214	6.74902	7.3734	7.36254	0.441906	0.45276	0.61352	0.624375	0.000944107	0.0193377	0.690009	0.00691271	0.0427887	0.693627	0.0148331	0.447072	0.685185	0.0042113	0.0625005	0.680556	0.0157417	0.08707	0.68287	0.0241079	0.628209	0.677469	0.00249663	0.116667	0.712698	0.0112671	0.122614	0.719444	0.0166936	0.409665	0.703704	>	6.8047	37	25	5	26	0.880952	0.490196	0.587302	0.833333	0.666667	0.000136493	0
TPR	6.04345	6.0591	6.53079	6.26648	0.218428	0.482732	0.207384	0.471688	4.55818e-05	0.00338952	0.739963	2.53495e-06	0.00019873	0.804739	0.050806	0.537974	0.653595	0.000286496	0.0132577	0.736772	2.20961e-05	0.00108531	0.800926	0.0748984	0.709743	0.651235	0.00766498	0.169814	0.747619	0.000530628	0.0379947	0.813889	0.162524	0.618151	0.659259	>	6.10145	32	33	10	18	0.761905	0.647059	0.64	0.767442	0.698925	0.000139135	0
MURC	2.92233	2.92163	3.25872	2.99799	0.0758596	0.33659	0.0763555	0.337086	0.000492486	0.0132329	0.727824	2.21534e-05	0.000843561	0.810458	0.178454	0.686754	0.617647	0.00227298	0.0434825	0.725529	0.000179967	0.00450843	0.809028	0.201411	0.800554	0.614198	0.0376333	0.287687	0.733333	0.00970356	0.113907	0.813889	0.330481	0.736531	0.625926	>	2.94838	32	33	10	18	0.761905	0.647059	0.64	0.767442	0.698925	0.000139135	0
PPT1	10.7603	10.7718	11.1626	11.0421	0.27843	0.398973	0.270287	0.39083	0.000139391	0.00642066	0.713352	0.000374657	0.0058377	0.71732	0.00710452	0.425064	0.708061	0.000792289	0.0240286	0.705688	0.00168049	0.0200684	0.712963	0.0148849	0.598088	0.695988	0.0111678	0.187294	0.731746	0.013493	0.132294	0.727778	0.0219949	0.42327	0.737037	>	10.8681	32	33	10	18	0.761905	0.647059	0.64	0.767442	0.698925	0.000139135	0
SMYD3	8.33612	8.43246	8.59111	8.8169	0.452444	0.226663	0.384441	0.158659	0.00532753	0.0538186	0.704015	0.064494	0.190443	0.68219	0.00551229	0.410689	0.733115	0.0082891	0.0909981	0.722884	0.0645056	0.21148	0.709491	0.0097406	0.581574	0.740741	0.11237	0.437409	0.65873	0.23264	0.512249	0.616667	0.0673804	0.509456	0.714815	>	8.44545	32	33	10	18	0.761905	0.647059	0.64	0.767442	0.698925	0.000139135	0
RWDD3	7.42907	7.35897	7.99407	7.57485	0.166399	0.585613	0.215883	0.635097	0.00024748	0.00902807	0.714753	9.63399e-06	0.00048269	0.827614	0.129766	0.638276	0.56427	0.00236309	0.0444939	0.700397	0.000164084	0.0042711	0.8125	0.227539	0.813349	0.550926	0.0111358	0.187073	0.749206	0.00205604	0.0600032	0.863889	0.139823	0.591017	0.596296	>	7.85815	18	47	24	4	0.428571	0.921569	0.818182	0.661972	0.698925	0.000140566	0
NBAS	4.98418	4.98794	5.17432	5.09784	0.112557	0.189039	0.109903	0.186385	0.000481122	0.0131216	0.709617	5.18612e-05	0.00150691	0.768791	0.0421805	0.518453	0.630719	0.00230757	0.0438922	0.706349	0.000328455	0.00666638	0.766204	0.0721487	0.703845	0.626543	0.0358365	0.282161	0.71746	0.00795112	0.103123	0.775	0.20212	0.647834	0.640741	>	5.15834	18	47	24	4	0.428571	0.921569	0.818182	0.661972	0.698925	0.000140566	0
RNF123	6.48626	6.43952	6.21951	6.32407	-0.148445	-0.253006	-0.115456	-0.220017	0.00013509	0.00633939	0.699346	0.000133957	0.00291923	0.729575	0.0239771	0.478659	0.659041	0.000440701	0.0167787	0.699074	0.000479993	0.00862909	0.732639	0.0308532	0.642486	0.654321	0.0207655	0.235464	0.7	0.0103338	0.11798	0.722222	0.112431	0.563006	0.67037	<	6.20957	18	47	24	4	0.428571	0.921569	0.818182	0.661972	0.698925	0.000140566	0
ANXA11	7.60321	7.63652	7.14557	7.54066	-0.0723444	-0.467434	-0.0958554	-0.490945	0.000839502	0.0179492	0.699346	3.60117e-06	0.000247392	0.790033	0.483755	0.864257	0.578431	0.00469832	0.0661438	0.688492	5.27328e-05	0.00200723	0.777778	0.588283	0.933532	0.569444	0.0193122	0.231209	0.725397	0.000469114	0.0372816	0.819444	0.483834	0.818425	0.6	<	7.21726	18	47	24	4	0.428571	0.921569	0.818182	0.661972	0.698925	0.000140566	0
C21orf117	3.79071	3.8102	3.63702	3.6707	-0.125739	-0.159427	-0.139493	-0.17318	0.000809296	0.0175324	0.698413	0.00145964	0.0148768	0.724673	0.0299093	0.490095	0.663399	0.00399996	0.0604409	0.68254	0.0052132	0.0422445	0.709491	0.0599587	0.695432	0.646605	0.0105298	0.183529	0.736508	0.00764907	0.100667	0.761111	0.0662339	0.507117	0.703704	<	3.59695	18	47	24	4	0.428571	0.921569	0.818182	0.661972	0.698925	0.000140566	0
NAP1L1	9.46063	9.72795	9.9431	9.71297	0.173719	0.403855	-0.0149793	0.215157	0.000291051	0.00981181	0.696078	0.000117371	0.00266329	0.758987	0.0900493	0.591657	0.6122	3.73612e-05	0.00436776	0.748016	2.53894e-05	0.00120275	0.796296	0.0180993	0.618488	0.683642	0.304265	0.641894	0.571429	0.102822	0.346599	0.669444	0.892225	0.972332	0.559259	>	9.98986	18	47	24	4	0.428571	0.921569	0.818182	0.661972	0.698925	0.000140566	0
TNFRSF1A	9.45683	9.39274	8.85414	9.37953	-0.0584466	-0.583839	-0.0132036	-0.538596	0.00074365	0.0167156	0.691877	2.89734e-06	0.00021626	0.801471	0.620243	0.906895	0.545752	0.00102038	0.0272343	0.710979	3.92143e-06	0.000336452	0.826389	0.502915	0.918856	0.557099	0.0667736	0.35606	0.646032	0.00433056	0.0802437	0.741667	0.938245	0.982888	0.518519	<	8.96379	18	47	24	4	0.428571	0.921569	0.818182	0.661972	0.698925	0.000140566	0
MDM4	5.85163	5.85047	6.12534	6.03236	0.181068	0.274053	0.181886	0.274871	0.00103887	0.020542	0.690476	0.000889234	0.0105768	0.727941	0.0518523	0.542282	0.640523	0.00346109	0.0550907	0.683862	0.00254098	0.0264842	0.721065	0.077478	0.709954	0.634259	0.0226286	0.24382	0.706349	0.0105353	0.119135	0.744444	0.133183	0.585156	0.655556	>	6.2079	18	47	24	4	0.428571	0.921569	0.818182	0.661972	0.698925	0.000140566	0
C14orf43	5.28886	5.23656	5.09339	5.19275	-0.0807323	-0.180083	-0.0438113	-0.143162	0.0015891	0.0266248	0.679272	0.000197013	0.00374737	0.754085	0.150609	0.657399	0.579521	0.00172084	0.0369749	0.70172	0.00020884	0.00492908	0.775463	0.116785	0.742093	0.603395	0.131854	0.465131	0.625397	0.0320524	0.19672	0.702778	0.587	0.863554	0.522222	<	5.07817	18	47	24	4	0.428571	0.921569	0.818182	0.661972	0.698925	0.000140566	0
ARHGAP12	6.81294	6.75165	7.15412	7.03993	0.245013	0.359205	0.288275	0.402467	0.000913968	0.0190225	0.678338	0.00161548	0.0159899	0.705882	0.0273534	0.487363	0.641612	0.00536126	0.0715295	0.666005	0.00705135	0.0519394	0.694444	0.0594811	0.695432	0.628086	0.0107999	0.185164	0.707937	0.0125796	0.128313	0.733333	0.0342853	0.462626	0.674074	>	7.26285	18	47	24	4	0.428571	0.921569	0.818182	0.661972	0.698925	0.000140566	0
TAGLN3	4.37287	4.44716	5.05817	4.45743	0.0627178	0.663456	0.0102772	0.611015	0.00169084	0.0275706	0.654995	2.68134e-05	0.000962347	0.767157	0.469128	0.856295	0.505447	0.0043771	0.0640576	0.669974	0.00017228	0.00439854	0.782407	0.348644	0.870321	0.520062	0.120926	0.448936	0.619048	0.0255052	0.17719	0.730556	0.939249	0.983476	0.52963	>	4.7036	18	47	24	4	0.428571	0.921569	0.818182	0.661972	0.698925	0.000140566	0
MRPS26	8.87422	9.0073	9.24387	9.11336	0.200003	0.330516	0.106067	0.23658	0.00650045	0.0604935	0.651261	0.00351886	0.0270664	0.686275	0.125357	0.63315	0.604575	0.00372099	0.0577085	0.667328	0.00140619	0.0179131	0.699074	0.0726384	0.70469	0.625	0.256547	0.60516	0.612698	0.154243	0.421298	0.655556	0.586247	0.863477	0.555556	>	9.3146	18	47	24	4	0.428571	0.921569	0.818182	0.661972	0.698925	0.000140566	0
KIAA0495	5.02797	5.13608	5.40174	5.05109	-0.00867806	0.341973	-0.0849955	0.265656	0.014911	0.0979254	0.639122	0.000268043	0.00466764	0.752451	0.917267	0.983288	0.511983	0.012081	0.111398	0.660714	0.000357991	0.00707098	0.771991	0.793482	0.975734	0.512346	0.352606	0.682905	0.587302	0.0558634	0.257791	0.705556	0.434033	0.792901	0.57037	>	5.382	18	47	24	4	0.428571	0.921569	0.818182	0.661972	0.698925	0.000140566	0
C6orf182	3.26359	3.41454	3.52383	3.34235	0.034365	0.215847	-0.0721929	0.109289	0.0282973	0.142169	0.72409	0.00778269	0.0462496	0.79085	0.681114	0.922692	0.635076	0.000156838	0.00989072	0.739418	1.28738e-05	0.000761735	0.806713	0.0874806	0.720795	0.649691	0.767168	0.912846	0.687302	0.419706	0.680095	0.752778	0.606061	0.872328	0.6	>	3.17323	40	19	2	32	0.952381	0.372549	0.555556	0.904762	0.634409	0.000143493	0
PSD4	6.028	6.01743	5.69436	5.78838	-0.236509	-0.330522	-0.229048	-0.323061	0.000288686	0.00981181	0.718021	0.000728342	0.0092212	0.740196	0.0157867	0.447072	0.688453	0.0013412	0.0319571	0.715608	0.00269633	0.0273062	0.733796	0.029344	0.64222	0.691358	0.0108922	0.186129	0.72381	0.0114289	0.122968	0.755556	0.03517	0.465132	0.681481	<	6.23752	40	19	2	32	0.952381	0.372549	0.555556	0.904762	0.634409	0.000143493	0
CLDN17	4.72716	4.59666	4.38457	4.47337	-0.215403	-0.304205	-0.123287	-0.21209	0.00291603	0.0382008	0.688142	0.00787767	0.0466172	0.726307	0.0979565	0.600732	0.637255	0.00286834	0.0500358	0.691799	0.00863229	0.0589775	0.731481	0.0864964	0.718804	0.638889	0.0222908	0.242551	0.679365	0.0135776	0.132599	0.713889	0.19551	0.641571	0.633333	<	4.71479	40	19	2	32	0.952381	0.372549	0.555556	0.904762	0.634409	0.000143493	0
GLB1	8.71897	8.76651	8.41211	8.58843	-0.14452	-0.320837	-0.178077	-0.354395	0.00117724	0.0220357	0.684874	0.000742411	0.00935784	0.712418	0.107732	0.611101	0.648148	0.00735646	0.0850075	0.662698	0.00455053	0.0385138	0.689815	0.194458	0.796598	0.626543	0.00682782	0.163076	0.738095	0.00423698	0.0792344	0.766667	0.0428884	0.484297	0.7	<	8.91378	40	19	2	32	0.952381	0.372549	0.555556	0.904762	0.634409	0.000143493	0
SH3GL1	8.71826	8.61769	8.4126	8.53192	-0.156759	-0.276084	-0.0857709	-0.205096	0.00129779	0.0233101	0.671335	0.00165342	0.0162665	0.700163	0.0813141	0.586902	0.632898	0.000961257	0.0265851	0.690476	0.00143068	0.0180674	0.721065	0.0514982	0.68781	0.649691	0.0943686	0.410381	0.625397	0.0609701	0.269241	0.65	0.380146	0.765188	0.592593	<	8.81664	40	19	2	32	0.952381	0.372549	0.555556	0.904762	0.634409	0.000143493	0
NOD1	6.288	6.40006	6.10269	6.21946	-0.101493	-0.218271	-0.180596	-0.297374	0.0113713	0.0832989	0.654062	0.00795079	0.0468862	0.700163	0.257828	0.746469	0.592593	0.0633099	0.269054	0.628968	0.0373893	0.14955	0.675926	0.478174	0.909521	0.566358	0.00384347	0.136474	0.714286	0.00231754	0.0624453	0.758333	0.0644787	0.502363	0.655556	<	6.51439	40	19	2	32	0.952381	0.372549	0.555556	0.904762	0.634409	0.000143493	0
SCN1A	2.78791	2.91397	2.66674	2.72476	-0.100226	-0.158253	-0.189208	-0.247235	0.0148459	0.0976669	0.615313	0.020692	0.0893423	0.642157	0.21292	0.717789	0.579521	0.0856854	0.315749	0.562169	0.0775096	0.238384	0.587963	0.440303	0.900377	0.527778	0.000927215	0.0904193	0.742857	0.00138863	0.0529022	0.772222	0.0433561	0.48508	0.703704	<	2.91015	40	19	2	32	0.952381	0.372549	0.555556	0.904762	0.634409	0.000143493	0
NUF2	7.642	7.46078	8.24959	8.14291	0.554213	0.660887	0.682131	0.788805	7.48224e-05	0.00454642	0.735761	0.000703566	0.00898721	0.756536	0.00608221	0.410689	0.708061	0.000307209	0.0136173	0.733466	0.00156833	0.0191993	0.756944	0.00803598	0.581574	0.70216	0.00115816	0.0946347	0.74127	0.00502516	0.0854166	0.755556	0.0118678	0.397188	0.722222	>	7.94444	31	34	11	17	0.738095	0.666667	0.645833	0.755556	0.698925	0.000150126	0
MRPL11	8.69601	8.60938	8.96867	9.02231	0.351778	0.298146	0.412924	0.359293	0.000502846	0.0133854	0.722222	0.00623547	0.0398354	0.701797	0.0054586	0.410689	0.749455	0.00292795	0.0505895	0.706349	0.0174716	0.093016	0.686343	0.0145026	0.593454	0.733025	0.00283056	0.122488	0.760317	0.00928275	0.110988	0.738889	0.0104774	0.393563	0.788889	>	8.85352	31	34	11	17	0.738095	0.666667	0.645833	0.755556	0.698925	0.000150126	0
C21orf121	3.96236	3.96914	3.74358	3.86211	-0.102245	-0.220772	-0.107035	-0.225562	0.000289636	0.00981181	0.714286	7.3674e-05	0.00194817	0.777778	0.0899354	0.591609	0.62963	0.000610113	0.0204988	0.733466	9.74428e-05	0.00297856	0.803241	0.0927838	0.729391	0.640432	0.0159137	0.216937	0.668254	0.00574886	0.0894719	0.716667	0.220997	0.661666	0.603704	<	3.86209	31	34	11	17	0.738095	0.666667	0.645833	0.755556	0.698925	0.000150126	0
CSRNP2	6.77836	6.70809	7.09239	6.86645	0.10876	0.334703	0.158364	0.384307	0.00151117	0.025823	0.707283	0.000328494	0.00536076	0.751634	0.227519	0.724524	0.648148	0.0108606	0.104684	0.685847	0.00285939	0.0283872	0.732639	0.381446	0.882327	0.623457	0.00502019	0.145528	0.75873	0.00133037	0.0520484	0.797222	0.0809984	0.52542	0.707407	>	6.85151	31	34	11	17	0.738095	0.666667	0.645833	0.755556	0.698925	0.000150126	0
KIF2C	7.44136	7.49994	8.16661	7.71424	0.255651	0.708015	0.214303	0.666667	0.000510667	0.0135215	0.703548	0.000133857	0.00291923	0.75817	0.157476	0.664999	0.630719	0.000901249	0.0255559	0.714947	0.000251818	0.00560164	0.768519	0.140277	0.765185	0.643519	0.023287	0.24632	0.67619	0.0074583	0.0996656	0.733333	0.30896	0.725731	0.6	>	7.61724	31	34	11	17	0.738095	0.666667	0.645833	0.755556	0.698925	0.000150126	0
TAL2	4.02755	3.96316	4.21316	4.15565	0.147039	0.204546	0.192491	0.249998	0.000411652	0.0121198	0.702614	0.000139205	0.0029891	0.745098	0.0195506	0.467856	0.645969	0.00562103	0.0732389	0.679894	0.00198118	0.022389	0.725694	0.0711421	0.703845	0.618827	0.00696219	0.16498	0.757143	0.00221621	0.0609934	0.791667	0.0483508	0.488411	0.711111	>	4.06817	31	34	11	17	0.738095	0.666667	0.645833	0.755556	0.698925	0.000150126	0
KDR	6.844	6.90668	6.43413	6.5742	-0.288233	-0.428304	-0.332482	-0.472553	0.000894691	0.0187679	0.701214	0.0013444	0.0140638	0.727941	0.0557351	0.546421	0.665577	0.00248644	0.0456324	0.699074	0.00245258	0.0257779	0.722222	0.0759923	0.709743	0.66821	0.00876321	0.172919	0.706349	0.00756249	0.100187	0.741667	0.0935666	0.539813	0.659259	<	6.73405	31	34	11	17	0.738095	0.666667	0.645833	0.755556	0.698925	0.000150126	0
MRPL45	7.83202	7.70081	8.0784	8.02884	0.235415	0.284971	0.328027	0.377583	0.00587269	0.0569355	0.687675	0.0122621	0.0628866	0.714052	0.0662486	0.56434	0.652505	0.0279201	0.173124	0.662037	0.0377899	0.150221	0.6875	0.139096	0.764621	0.628086	0.00970508	0.180822	0.749206	0.012724	0.128858	0.777778	0.0500712	0.488411	0.711111	>	7.86228	31	34	11	17	0.738095	0.666667	0.645833	0.755556	0.698925	0.000150126	0
MCM8	5.41369	5.42623	5.65885	5.56725	0.149871	0.241476	0.141023	0.232629	0.00768096	0.0667319	0.682073	0.00739133	0.044773	0.714052	0.139679	0.646794	0.639434	0.00763145	0.086797	0.676587	0.00517191	0.0419609	0.707176	0.115847	0.741665	0.635802	0.0964412	0.413178	0.695238	0.0760548	0.299648	0.730556	0.33756	0.741378	0.648148	>	5.44386	31	34	11	17	0.738095	0.666667	0.645833	0.755556	0.698925	0.000150126	0
LOC644794	4.63637	4.56959	4.4643	4.52479	-0.0919336	-0.152421	-0.044796	-0.105284	0.0104276	0.0793609	0.672736	0.013794	0.0676704	0.709967	0.12328	0.629696	0.623094	0.00944015	0.0976802	0.681217	0.0142715	0.0812592	0.716435	0.0912632	0.727573	0.634259	0.246573	0.594611	0.652381	0.200433	0.476537	0.694444	0.479404	0.816435	0.596296	<	4.56305	31	34	11	17	0.738095	0.666667	0.645833	0.755556	0.698925	0.000150126	0
MEP1A	3.03482	3.11306	2.94386	2.97572	-0.0821113	-0.113974	-0.137335	-0.169197	0.00823534	0.0692898	0.669001	0.0142345	0.0691693	0.686275	0.0933358	0.595357	0.645969	0.0493353	0.236061	0.642857	0.0530022	0.186836	0.663194	0.216147	0.812698	0.615741	0.00806235	0.170088	0.731746	0.0149659	0.139389	0.741667	0.0466763	0.486033	0.718519	<	3.00123	31	34	11	17	0.738095	0.666667	0.645833	0.755556	0.698925	0.000150126	0
KATNA1	7.68933	7.6664	8.07045	7.96012	0.277534	0.387858	0.293722	0.404045	0.000106628	0.00553663	0.721289	0.000484848	0.00698112	0.731209	0.00717041	0.425064	0.708061	0.000675473	0.0218855	0.713624	0.00207656	0.0230903	0.724537	0.0147243	0.593454	0.699074	0.004188	0.139305	0.739683	0.00862608	0.106825	0.747222	0.009259	0.393563	0.72963	>	7.77999	33	31	9	20	0.785714	0.607843	0.622642	0.775	0.688172	0.000153449	0
WEE1	8.12887	8.03366	8.642	8.41569	0.314819	0.541136	0.382023	0.60834	0.000147649	0.00662434	0.717554	0.000194776	0.00371543	0.735294	0.0208445	0.469558	0.6939	0.00102586	0.0273288	0.700397	0.000961718	0.0139925	0.722222	0.0380607	0.665679	0.671296	0.0040038	0.13881	0.75873	0.00452527	0.0816108	0.766667	0.0293424	0.448992	0.748148	>	8.14983	33	31	9	20	0.785714	0.607843	0.622642	0.775	0.688172	0.000153449	0
RPLP2	6.90335	6.92355	7.06932	7.03139	0.122096	0.16003	0.107834	0.145768	0.00014824	0.00662967	0.717554	0.000485057	0.00698112	0.723856	0.0104071	0.430742	0.70915	0.000489903	0.0178391	0.714947	0.00129294	0.0170451	0.724537	0.0155435	0.604936	0.70216	0.0165415	0.220357	0.72381	0.0183101	0.152962	0.722222	0.0658499	0.505622	0.725926	>	6.93928	33	31	9	20	0.785714	0.607843	0.622642	0.775	0.688172	0.000153449	0
C4orf14	8.50634	8.465	8.79289	8.9253	0.431121	0.298712	0.460303	0.327894	0.000803033	0.0174494	0.712885	0.010642	0.0576195	0.714052	0.0022828	0.387853	0.711329	0.00296577	0.0508064	0.702381	0.0194993	0.0993653	0.702546	0.00517334	0.581574	0.70216	0.0179615	0.225263	0.738095	0.0456147	0.233996	0.741667	0.0234503	0.430683	0.733333	>	8.52129	33	31	9	20	0.785714	0.607843	0.622642	0.775	0.688172	0.000153449	0
DIAPH3	4.74902	4.64107	5.08296	5.01974	0.302468	0.365686	0.378665	0.441883	0.000729306	0.0165168	0.710084	0.00235988	0.0205472	0.719771	0.0163612	0.447438	0.697168	0.00490541	0.0678644	0.693122	0.00942053	0.0623389	0.704861	0.0400927	0.668537	0.677469	0.00536077	0.148568	0.750794	0.00914082	0.110748	0.755556	0.0217703	0.422286	0.744444	>	4.71706	33	31	9	20	0.785714	0.607843	0.622642	0.775	0.688172	0.000153449	0
ACVRL1	6.11897	6.22828	5.86187	5.9903	-0.160821	-0.289251	-0.237985	-0.366416	0.000717384	0.01639	0.70028	0.000492289	0.00705473	0.750817	0.084864	0.586902	0.632898	0.00667448	0.0800417	0.676587	0.0032291	0.0307248	0.729167	0.190983	0.792816	0.606481	0.00114387	0.0944925	0.757143	0.000478596	0.0372816	0.802778	0.040606	0.480546	0.696296	<	6.10737	33	31	9	20	0.785714	0.607843	0.622642	0.775	0.688172	0.000153449	0
[truncated: 1,425 more rows]

## Sheet: SUP2B
prediction of basaloid vs non-basaloid tumors based on SOX4 and IVL quickscore (QS)
[truncated: 102 more rows]

[truncated: 8 more sheets: SUP3, SUP4A, SUP4B, SUP4C, SUP5, SUP6A, SUP6B, SUP7]
